# Supplementary material for: Iridium-catalyzed asymmetric hydrogenation of 5-hydroxypicolinate pyridinium salts under batch and flow: stereodefined access to cis-configurated hydroxypiperidine esters
Source: Royal Society of Chemistry journal article supplement (doi:10.1039/d4qo00322e), 2024-01-01
Supplement: d4qo00322e1.pdf [file d4qo00322e1.pdf]

## Supporting Information

# Iridium-Catalyzed Asymmetric Hydrogenation of 5-Hydroxypicolinate Pyridinium Salts under Batch and Flow: Stereodefined Access to *Cis*-Configured Hydroxypiperidine Esters

Zhi Yang,<sup>a</sup> Shangxian Luan,<sup>a</sup> Linxi Wan,<sup>a</sup> Jingxi Chen,<sup>a</sup> Xiaofang Wei,<sup>a</sup> Pei Tang<sup>\*a</sup> and Fen-Er Chen<sup>\*abcd</sup>

<sup>a</sup>*Sichuan Research Center for Drug Precision Industrial Technology, West China School of Pharmacy, Sichuan University, Chengdu 610041, China*

<sup>b</sup>*College of Chemistry and Chemical Engineering, Jiangxi Normal University, Nanchang, Jiangxi, 330022, China*

<sup>c</sup>*Engineering Center of Catalysis and Synthesis for Chiral Molecules, Department of Chemistry, Fudan University, Shanghai 200433, China*

<sup>d</sup>*Shanghai Engineering Center of Industrial Asymmetric Catalysis for Chiral Drugs, Shanghai 200433, China*

\*Corresponding Author: Pei Tang, E-mail: peitang@scu.edu.cn; Fen-Er Chen, E-mail: rfchen@fudan.edu.cn

### Table of Contents

|                                  |     |
|----------------------------------|-----|
| 1. General Information .....     | 1   |
| 2. Experimental Procedures ..... | 1   |
| 3. References .....              | 25  |
| 4. NMR Spectra .....             | 26  |
| 5. HPLC Spectra .....            | 112 |
| 6. Crystallographic Data .....   | 150 |

## 1. General Information

All commercially available reagents were used without further purification. Tetrahydrofuran and toluene were dried with sodium chips and indicated by benzophenone, other anhydrous solvents were purchased from Aladdin. Chromatography was conducted by using 300–400 mesh silica gel. All new compounds were characterized by NMR spectroscopy, high resolution mass spectrometry (HRMS) and melting point (if solids). NMR spectra were recorded on a 400 MHz NMR spectrometer. Reference values for residual solvents were taken as  $\delta = 7.26$  ( $\text{CDCl}_3$ ) ppm,  $\delta = 2.50$  ( $\text{DMSO}-d_6$ ) ppm for  $^1\text{H}$  NMR and  $\delta = 77.16$  ( $\text{CDCl}_3$ ) ppm,  $\delta = 39.52$  ( $\text{DMSO}-d_6$ ) ppm for  $^{13}\text{C}$  NMR. Coupling constants ( $J$ ) were given in Hz and multiplicities for coupled signals were denoted as: s = singlet, d = doublet, t = triplet, q = quartet, m = multiplet, br = broad and dd = double doublet etc. Infrared (IR) spectra were recorded on a Perkin Elmer Spectrum Two FT-IR spectrometer. High-resolution mass spectra (HRMS) were recorded on a Bruker microTOF Q III by the ESI method. Melting points (m.p.) were recorded on an SRS-optic melting point apparatus. Chiral HPLC was performed using a Daicel Chiralcel AD-H column, OJ-H column, IC column and OD-H column.

## 2. Experimental Procedures

### 2.1 General Procedures for 5-hydroxypicolinate esters

Picolinic acid esters were synthesized from 5-hydroxypicolinic acid with the corresponding alcohols via esterification. Methyl-5-hydroxypiperidine-2-carboxylate **S1m** was commercially available.

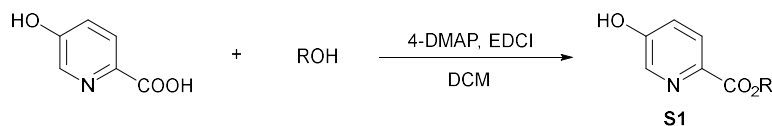

5-hydroxypicolinic acid (500.0 mg, 3.6 mmol, 1.0 equiv.), 4-DMAP (219.6 mg, 1.8 mmol, 0.5 equiv.) and EDCI (1.0 g, 5.4 mmol, 1.5 equiv.) were dissolved in dichloromethane (15 mL) and stirred at 0 °C for 15 min. Alcohol (4.0 mmol, 1.1 equiv.) was added to the reaction mixture that was then stirred at room temperature for 12 h. Water was added and the solution was extracted with dichloromethane. The combined organic layer was washed with brine, dried over anhydrous  $\text{Na}_2\text{SO}_4$ , filtered and concentrated under reduced pressure. The residue was purified by silica gel flash column chromatography (dichloromethane/methanol = 100:1) to give the desired products (81% – 95% yields).

**benzyl 5-hydroxypicolinate (S1a):** 758.0 mg, 92% yield, white solid, m.p. = 171.1 – 171.9 °C.  $^1\text{H}$  NMR (400 MHz,  $\text{DMSO}-d_6$ )  $\delta$  10.84 (s, 1H), 8.23 (d,  $J = 2.8$  Hz, 1H), 7.98 (d,  $J = 8.4$  Hz, 1H), 7.48 – 7.31 (m, 5H), 7.27 (dd,  $J = 8.4, 2.8$  Hz, 1H), 5.32 (s, 2H).  $^{13}\text{C}$  NMR (100 MHz,  $\text{DMSO}-d_6$ )  $\delta$  164.3, 156.9, 138.4, 138.2, 136.2, 128.5, 128.2, 128.1, 126.9, 122.1, 66.1. HRMS (ESI)  $m/z$  calcd for  $\text{C}_{13}\text{H}_{11}\text{NNaO}_3$   $[\text{M} + \text{Na}]^+$ : 252.0631, found: 252.0630.

**4-(methoxycarbonyl)benzyl 5-hydroxypicolinate (S1b):** 918.9 mg, 89% yield, white solid, m.p. =

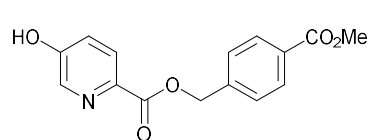

133.3 – 134.8 °C. <sup>1</sup>H NMR (400 MHz, DMSO-*d*<sub>6</sub>) δ 10.88 (s, 1H), 8.24 (d, *J* = 2.8 Hz, 1H), 7.99 (m, 3H), 7.58 (d, *J* = 8.0 Hz, 2H), 7.28 (dd, *J* = 8.8, 2.8 Hz, 1H), 5.40 (s, 2H), 3.85 (s, 3H). <sup>13</sup>C NMR (100

MHz, DMSO-*d*<sub>6</sub>) δ 166.0, 164.2, 157.0, 141.7, 138.5, 138.0, 129.4, 129.2, 127.9, 127.0, 122.1, 65.4, 52.2. HRMS (ESI) *m/z* calcd for C<sub>15</sub>H<sub>13</sub>NNaO<sub>5</sub> [*M* + Na]<sup>+</sup>: 310.0686, found: 310.0689.

**4-(trifluoromethyl)benzyl 5-hydroxypicolinate (S1c):** 918.7 mg, 86% yield, white solid, m.p. = 158.7

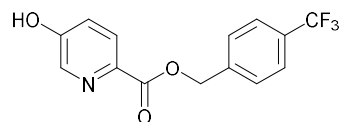

– 159.6 °C. <sup>1</sup>H NMR (400 MHz, DMSO-*d*<sub>6</sub>) δ 10.90 (s, 1H), 8.24 (d, *J* = 2.8 Hz, 1H), 8.00 (d, *J* = 8.8 Hz, 1H), 7.80 – 7.65 (m, 4H), 7.28 (dd, *J* = 8.8, 2.8 Hz, 1H), 5.42 (s, 2H). <sup>13</sup>C NMR (100 MHz, DMSO-*d*<sub>6</sub>) δ

164.2, 157.1, 141.0, 138.5, 138.0, 128.7 (q, *J* = 31.7 Hz), 128.4, 126.9, 125.3 (q, *J* = 3.6 Hz), 124.2 (q, *J* = 270.4 Hz), 122.1, 65.2. HRMS (ESI) *m/z* calcd for C<sub>14</sub>H<sub>10</sub>F<sub>3</sub>NNaO<sub>3</sub> [*M* + Na]<sup>+</sup>: 320.0505, found: 320.0504.

**4-nitrobenzyl 5-hydroxypicolinate (S1d):** 877.2 mg, 89% yield, white solid, m.p. = 211.7 – 213.0 °C.

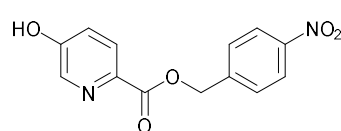

<sup>1</sup>H NMR (400 MHz, DMSO-*d*<sub>6</sub>) δ 10.92 (s, 1H), 8.29 – 8.21 (m, 3H), 8.01 (d, *J* = 8.4 Hz, 1H), 7.71 (d, *J* = 8.8 Hz, 2H), 7.28 (dd, *J* = 8.4, 2.8 Hz, 1H), 5.47 (s, 2H). <sup>13</sup>C NMR (100 MHz, DMSO-*d*<sub>6</sub>) δ 164.1, 157.1, 147.1, 144.0, 138.5, 137.8, 128.6, 127.0, 123.7, 122.1, 64.9.

HRMS (ESI) *m/z* calcd for C<sub>13</sub>H<sub>10</sub>N<sub>2</sub>NaO<sub>5</sub> [*M* + Na]<sup>+</sup>: 297.0482, found: 297.0480.

**4-cyanobenzyl 5-hydroxypicolinate (S1e):** 840.7 mg, 92% yield, white solid, m.p. = 208.6 – 209.5 °C.

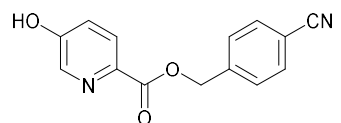

<sup>1</sup>H NMR (400 MHz, DMSO-*d*<sub>6</sub>) δ 10.90 (s, 1H), 8.24 (d, *J* = 2.8 Hz, 1H), 8.00 (d, *J* = 8.4 Hz, 1H), 7.86 (d, *J* = 8.4 Hz, 2H), 7.64 (d, *J* = 8.0 Hz, 2H), 7.28 (dd, *J* = 8.8, 3.2 Hz, 1H), 5.41 (s, 2H). <sup>13</sup>C NMR (100

MHz, DMSO-*d*<sub>6</sub>) δ 164.1, 157.1, 141.9, 138.5, 137.9, 132.5, 128.4, 127.0, 122.1, 118.7, 110.7, 65.2. HRMS (ESI) *m/z* calcd for C<sub>14</sub>H<sub>10</sub>N<sub>2</sub>NaO<sub>3</sub> [*M* + Na]<sup>+</sup>: 277.0584, found: 277.0577.

**4-bromobenzyl 5-hydroxypicolinate (S1f):** 996.7 mg, 90% yield, white solid, m.p. = 163.0 – 164.2 °C.

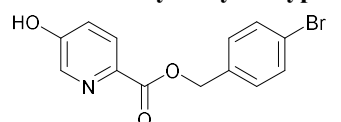

<sup>1</sup>H NMR (400 MHz, DMSO-*d*<sub>6</sub>) δ 10.87 (s, 1H), 8.22 (d, *J* = 2.8 Hz, 1H), 7.97 (d, *J* = 8.4 Hz, 1H), 7.60 (d, *J* = 8.4 Hz, 2H), 7.42 (d, *J* = 8.4 Hz, 2H), 7.27 (dd, *J* = 8.4, 2.8 Hz, 1H), 5.29 (s, 2H). <sup>13</sup>C NMR (100

MHz, DMSO-*d*<sub>6</sub>) δ 164.2, 157.0, 138.4, 138.1, 135.7, 131.4, 130.3, 126.9, 122.1, 121.3, 65.3. HRMS (ESI) *m/z* calcd for C<sub>13</sub>H<sub>10</sub>BrNNaO<sub>3</sub> [*M* + Na]<sup>+</sup>: 329.9736, found: 329.9741.

**4-fluorobenzyl 5-hydroxypicolinate (S1g):** 854.6 mg, 91% yield, white solid, m.p. = 160.4 – 161.8 °C.

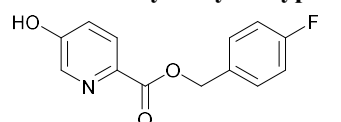

<sup>1</sup>H NMR (400 MHz, DMSO-*d*<sub>6</sub>) δ 10.86 (s, 1H), 8.22 (d, *J* = 2.8 Hz, 1H), 7.97 (d, *J* = 8.8 Hz, 1H), 7.56 – 7.46 (m, 2H), 7.30 – 7.16 (m, 3H), 5.30 (s, 2H). <sup>13</sup>C NMR (100 MHz, DMSO-*d*<sub>6</sub>) δ 164.3, 162.0 (d, *J* = 242.6

Hz) 156.9, 138.4, 138.2, 132.5 (d, *J* = 3.0 Hz), 130.6 (d, *J* = 8.3 Hz), 126.9, 122.1, 115.3 (d, *J* = 21.4 Hz), 65.4. HRMS (ESI) *m/z* calcd for C<sub>13</sub>H<sub>10</sub>FNNaO<sub>3</sub> [*M* + Na]<sup>+</sup>: 270.0537, found: 270.0537.

**4-chlorobenzyl 5-hydroxypicolinate (S1h):** 843.4 mg, 89% yield, white solid, m.p. = 154.8 – 155.2 °C.

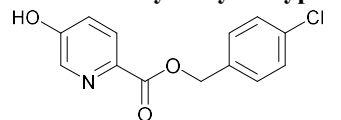

<sup>1</sup>H NMR (400 MHz, DMSO-*d*<sub>6</sub>) δ 10.87 (s, 1H), 8.23 (d, *J* = 2.8 Hz, 1H), 7.97 (d, *J* = 8.4 Hz, 1H), 7.52 – 7.42 (m, 4H), 7.27 (dd, *J* = 8.8, 2.8 Hz, 1H), 5.31 (s, 2H). <sup>13</sup>C NMR (100 MHz, DMSO-*d*<sub>6</sub>) δ 164.2, 157.0,

138.4, 138.1, 135.3, 132.8, 130.0, 128.5, 126.9, 122.1, 65.3. HRMS (ESI) *m/z* calcd for C<sub>13</sub>H<sub>10</sub>ClNNaO<sub>3</sub> [*M* + Na]<sup>+</sup>: 286.0241, found: 286.0243.

**4-methylbenzyl 5-hydroxypicolinate (S1i):** 795.6 mg, 91% yield, white solid, m.p. = 167.7 – 169.2 °C.

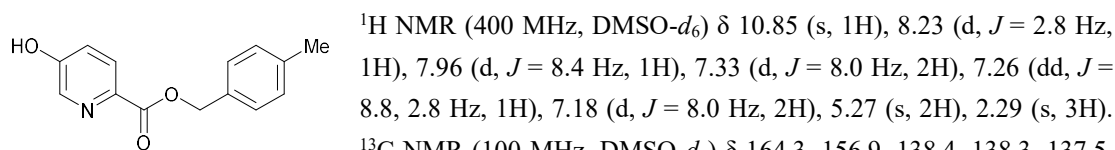

<sup>13</sup>C NMR (100 MHz, DMSO-*d*<sub>6</sub>) δ 164.3, 156.9, 138.4, 138.3, 137.5, 133.2, 129.0, 128.4, 126.8, 122.1, 66.0, 20.8. HRMS (ESI) *m/z* calcd for C<sub>14</sub>H<sub>13</sub>NNaO<sub>3</sub> [M + Na]<sup>+</sup>: 266.0788, found: 266.0789.

**3-methylbenzyl 5-hydroxypicolinate (S1j):** 813.1 mg, 93% yield, white solid, m.p. = 161.0 – 162.5 °C.

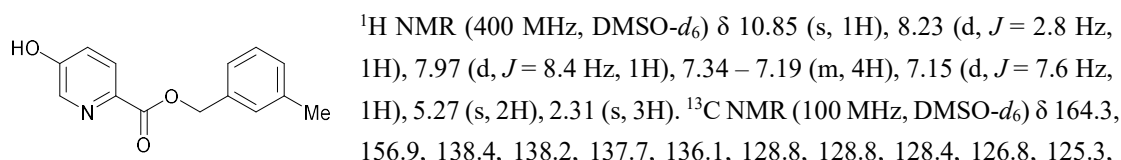

122.1, 66.1, 21.0. HRMS (ESI) *m/z* calcd for C<sub>14</sub>H<sub>13</sub>NNaO<sub>3</sub> [M + Na]<sup>+</sup>: 266.0788, found: 266.0787.

**3-bromobenzyl 5-hydroxypicolinate (S1k):** 1.0 g, 92% yield, white solid, m.p. = 148.0 – 149.5 °C. <sup>1</sup>H

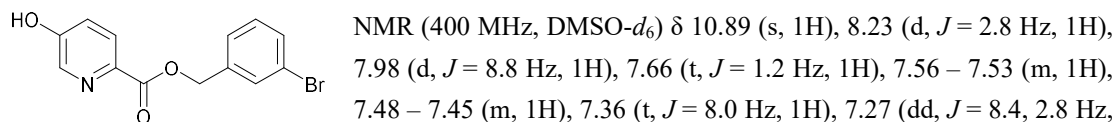

130.7, 127.1, 126.9, 122.1, 121.7, 65.2. HRMS (ESI) *m/z* calcd for C<sub>13</sub>H<sub>10</sub>BrNNaO<sub>3</sub> [M + Na]<sup>+</sup>: 329.9736, found: 329.9749.

**2,3-dimethoxybenzyl 5-hydroxypicolinate (S1l):** 883.7 mg, 85% yield, white solid, m.p. = 137.2 –

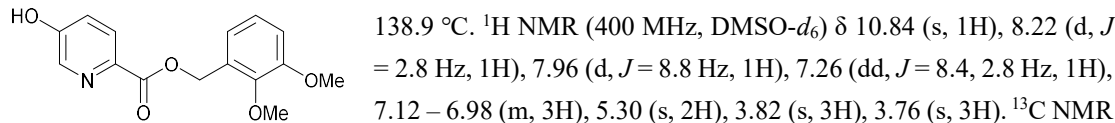

(100 MHz, DMSO-*d*<sub>6</sub>) δ 164.2, 156.9, 152.4, 147.0, 138.4, 138.3, 129.5, 126.8, 124.1, 122.1, 121.4, 113.3, 61.7, 60.5, 55.7. HRMS (ESI) *m/z* calcd for C<sub>15</sub>H<sub>15</sub>NNaO<sub>5</sub> [M + Na]<sup>+</sup>: 312.0842, found: 312.0844.

**ethyl 5-hydroxypicolinate (S1n):** 570.7 mg, 95% yield, white solid, m.p. = 162.0 – 163.3 °C. <sup>1</sup>H NMR

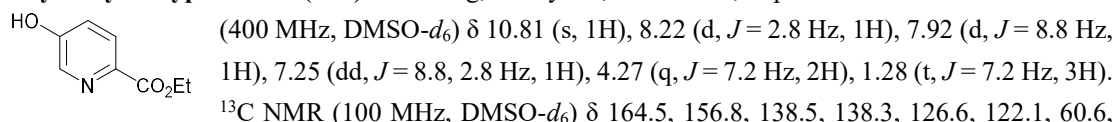

14.2. HRMS (ESI) *m/z* calcd for C<sub>8</sub>H<sub>9</sub>NNaO<sub>3</sub> [M + Na]<sup>+</sup>: 190.0475, found: 190.0475.

**isopropyl 5-hydroxypicolinate (S1o):** 527.5mg, 81% yield, white solid, m.p. = 157.2 – 158.7 °C. <sup>1</sup>H

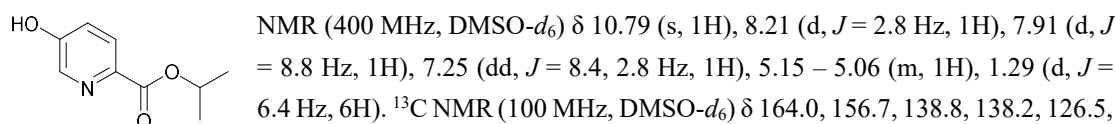

122.0, 67.9, 21.7. HRMS (ESI) *m/z* calcd for C<sub>9</sub>H<sub>11</sub>NNaO<sub>3</sub> [M + Na]<sup>+</sup>: 204.0631, found: 204.0630.

**tert-butyl 5-hydroxypicolinate (S1p):** 610.4 mg, 87% yield, white solid, m.p. = 173.5 – 174.6 °C. <sup>1</sup>H

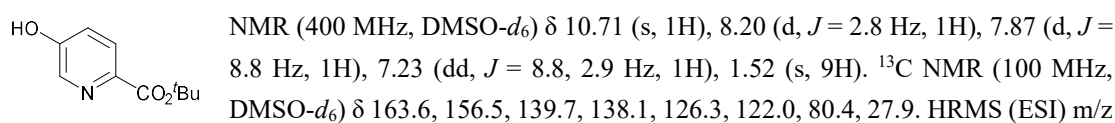

calcd for C<sub>10</sub>H<sub>13</sub>NNaO<sub>3</sub> [M + Na]<sup>+</sup>: 218.0788, found: 218.0793.



**cyclopropylmethyl 5-hydroxypicolinate (S1q):** 618.0 mg, 89% yield, white solid, m.p. = 133.7 – 134.5 °C. <sup>1</sup>H NMR (400 MHz, DMSO-*d*<sub>6</sub>) δ 10.82 (s, 1H), 8.22 (d, *J* = 2.8 Hz, 1H), 7.94 (d, *J* = 8.4 Hz, 1H), 7.26 (dd, *J* = 8.8, 2.8 Hz, 1H), 4.07 (d, *J* = 7.6 Hz, 2H), 1.26 – 1.13 (m, 1H), 0.60 – 0.50 (m, 2H), 0.32 (m, 2H). <sup>13</sup>C NMR (100 MHz, DMSO-*d*<sub>6</sub>) δ 164.6, 156.8, 138.5, 138.3, 126.7, 122.1, 69.2, 9.9, 3.2. HRMS (ESI) *m/z* calcd for C<sub>10</sub>H<sub>11</sub>NNaO<sub>3</sub> [M + Na]<sup>+</sup>: 216.0631, found: 216.0634.

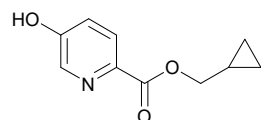

**cyclopentylmethyl 5-hydroxypicolinate (S1r):** 723.6 mg, 91% yield, white solid, m.p. = 119.8 – 122.1 °C. <sup>1</sup>H NMR (400 MHz, DMSO-*d*<sub>6</sub>) δ 10.80 (s, 1H), 8.23 (d, *J* = 2.8 Hz, 1H), 7.92 (d, *J* = 8.4 Hz, 1H), 7.26 (dd, *J* = 8.8, 2.8 Hz, 1H), 4.11 (d, *J* = 7.2 Hz, 2H), 2.32 – 2.17 (m, 1H), 1.71 (m, 2H), 1.63 – 1.44 (m, 4H), 1.28 (m, 2H). <sup>13</sup>C NMR (100 MHz, DMSO-*d*<sub>6</sub>) δ 164.5, 156.7, 138.5, 138.4, 126.6, 122.0, 68.2, 38.2, 28.9, 24.9. HRMS (ESI) *m/z* calcd for C<sub>12</sub>H<sub>15</sub>NNaO<sub>3</sub> [M + Na]<sup>+</sup>: 244.0944, found: 244.0946.

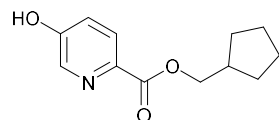

**cyclohexylmethyl 5-hydroxypicolinate (S1s):** 786.4 mg, 93% yield, white solid, m.p. = 145.8 – 146.9 °C. <sup>1</sup>H NMR (400 MHz, DMSO-*d*<sub>6</sub>) δ 10.80 (s, 1H), 8.23 (d, *J* = 2.8 Hz, 1H), 7.93 (d, *J* = 8.4 Hz, 1H), 7.26 (dd, *J* = 8.4, 2.8 Hz, 1H), 4.05 (d, *J* = 6.0 Hz, 2H), 1.81 – 1.55 (m, 6H), 1.30 – 0.90 (m, 5H). <sup>13</sup>C NMR (100 MHz, DMSO-*d*<sub>6</sub>) δ 164.4, 156.7, 138.5, 138.3, 126.6, 122.0, 69.3, 36.7, 29.1, 25.9, 25.2. HRMS (ESI) *m/z* calcd for C<sub>13</sub>H<sub>17</sub>NNaO<sub>3</sub> [M + Na]<sup>+</sup>: 258.1101, found: 258.1104.

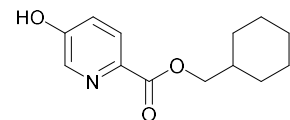

## 2.2 General Procedures for the synthesis of pyridinium salts<sup>1</sup>

A mixture of 5-hydroxypicolinate ester (1.0 mmol), benzyl bromide (1.2 mmol) and acetone (10.0 mL) was stirred at 50 °C for 24 h. Ether was added, the resulting precipitate was collected and rinsed with ethyl acetate to give the solid product which was directly used for the hydrogenation. If the desired product was not precipitated, the reaction mixture was purified by column chromatography on silica gel using CH<sub>2</sub>Cl<sub>2</sub>/MeOH (20:1) to give the desired products (86%–98% yields).

**1-benzyl-2-((benzyloxy)carbonyl)-5-hydroxypyridin-1-ium (1a):** 392.3 mg, 98% yield, white solid, m.p. = 134.6 – 136.0 °C. <sup>1</sup>H NMR (400 MHz, DMSO-*d*<sub>6</sub>) δ 7.97 (d, *J* = 9.6 Hz, 1H), 7.90 (d, *J* = 2.8 Hz, 1H), 7.34 – 7.32 (m, 8H), 7.19 (dd, *J* = 7.6, 2.4 Hz, 2H), 6.89 (dd, *J* = 9.6, 2.8 Hz, 1H), 5.97 (s, 2H), 5.23 (s, 2H). <sup>13</sup>C NMR (100 MHz, DMSO-*d*<sub>6</sub>) δ 170.6, 160.2, 141.6, 135.6, 135.6, 131.9, 130.2, 128.8, 128.5, 128.3, 128.2, 128.1, 127.0, 116.7, 66.6, 60.8. HRMS (ESI) *m/z* calcd for C<sub>20</sub>H<sub>18</sub>NO<sub>3</sub> [M – Br]<sup>+</sup>: 320.1281, found: 320.1280.

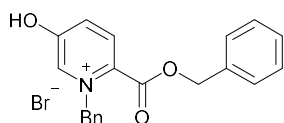

**1-benzyl-5-hydroxy-2-(((4-(methoxycarbonyl)benzyl)oxy)carbonyl)pyridin-1-ium (1b):** 403.3 mg, 88% yield, white solid, m.p. = 115.7 – 117.3 °C. <sup>1</sup>H NMR (400 MHz, DMSO-*d*<sub>6</sub>) δ 9.02 (d, *J* = 2.4 Hz, 1H), 8.51 (d, *J* = 8.8 Hz, 1H), 8.15 (dd, *J* = 8.8, 2.4 Hz, 1H), 7.94 (d, *J* = 8.0 Hz, 2H), 7.50 (d, *J* = 7.6 Hz, 2H), 7.41 – 7.23 (m, 5H), 6.18 (s, 2H), 5.43 (s, 2H), 3.85 (s, 3H). <sup>13</sup>C NMR (100 MHz, DMSO-*d*<sub>6</sub>) δ 165.9, 159.3, 139.8, 138.3, 134.2, 132.4, 132.3, 131.3, 129.6, 129.3, 129.0, 128.8, 128.3, 127.7, 67.7, 62.1, 52.3. HRMS (ESI) *m/z* calcd for C<sub>22</sub>H<sub>20</sub>NO<sub>5</sub> [M – Br]<sup>+</sup>: 378.1336, found: 378.1336.

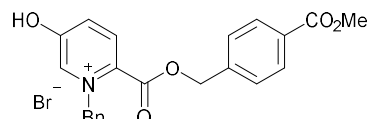

**1-benzyl-5-hydroxy-2-(((4-(trifluoromethyl)benzyl)oxy)carbonyl)pyridin-1-ium (1c):** 416.8 mg, 89% yield, white solid, m.p. = 151.4 – 152.7 °C. <sup>1</sup>H NMR (400 MHz, DMSO-*d*<sub>6</sub>) δ 8.98 (d, *J* = 2.4 Hz, 1H), 8.50 (d, *J* = 8.8 Hz, 1H), 8.10 (dd, *J* = 9.2, 2.8 Hz, 1H), 7.74 (d, *J* = 8.4 Hz, 2H), 7.59 (d, *J* = 8.0 Hz, 2H), 7.43 – 7.18 (m, 5H), 6.16 (s, 2H), 5.44 (s, 2H). <sup>13</sup>C NMR (100 MHz, DMSO-*d*<sub>6</sub>) δ 159.6, 159.2, 139.2, 138.3, 134.2, 132.3, 132.0, 131.2, 128.90 (q, *J* = 31.7 Hz), 128.88 (2C), 128.7, 127.6, 125.3 (q, *J* = 3.9 Hz), 124.1 (q, *J* = 270.6 Hz), 67.5, 62.1. HRMS (ESI) *m/z* calcd for C<sub>21</sub>H<sub>17</sub>F<sub>3</sub>NO<sub>3</sub> [M – Br]<sup>+</sup>: 388.1155, found: 388.1154.

**1-benzyl-5-hydroxy-2-(((4-nitrobenzyl)oxy)carbonyl)pyridin-1-ium (1d):** 423.0mg, 95% yield, white solid, m.p. = 147.9 – 149.9 °C. <sup>1</sup>H NMR (400 MHz, DMSO-*d*<sub>6</sub>) δ 8.20 (d, *J* = 8.0 Hz, 2H), 8.05 (d, *J* = 9.2 Hz, 1H), 7.92 (t, *J* = 2.4 Hz, 1H), 7.60 (d, *J* = 8.0 Hz, 2H), 7.40 – 7.28 (m, 3H), 7.18 (d, *J* = 6.8, 2H), 6.90 (dd, *J* = 11.6, 2.8 Hz, 1H), 5.96 (s, 2H), 5.37 (s, 2H). <sup>13</sup>C NMR (100 MHz, DMSO-*d*<sub>6</sub>) δ 170.7, 159.9, 147.1, 143.3, 141.9, 135.5, 132.0, 130.1, 128.8, 128.6, 128.2, 126.9, 123.5, 116.2, 65.3, 60.9. HRMS (ESI) *m/z* calcd for C<sub>20</sub>H<sub>17</sub>N<sub>2</sub>O<sub>5</sub> [M – Br]<sup>+</sup>: 365.1132, found: 365.1128.

**1-benzyl-2-(((4-cyanobenzyl)oxy)carbonyl)-5-hydroxypyridin-1-ium (1e):** 399.8 mg, 94% yield, white solid, m.p. = 144.1 – 145.2 °C. <sup>1</sup>H NMR (400 MHz, DMSO-*d*<sub>6</sub>) δ 8.98 (d, *J* = 2.4 Hz, 1H), 8.51 (d, *J* = 8.9 Hz, 1H), 8.11 (dd, *J* = 9.0, 2.6 Hz, 1H), 7.85 (d, *J* = 8.0 Hz, 2H), 7.56 (d, *J* = 8.0 Hz, 2H), 7.44 – 7.21 (m, 5H), 6.16 (s, 2H), 5.43 (s, 2H). <sup>13</sup>C NMR (100 MHz, DMSO-*d*<sub>6</sub>) δ 159.5, 159.2, 140.1, 138.3, 134.2, 132.5, 132.4, 132.1, 131.2, 129.0, 128.8 (2C), 127.6, 118.6, 111.1, 67.4, 62.2. HRMS (ESI) *m/z* calcd for C<sub>21</sub>H<sub>17</sub>N<sub>2</sub>O<sub>3</sub> [M – Br]<sup>+</sup>: 345.1234, found: 345.1234.

**1-benzyl-2-(((4-bromobenzyl)oxy)carbonyl)-5-hydroxypyridin-1-ium (1f):** 431.3 mg, 90% yield, white solid, m.p. = 135.7 – 137.2 °C. <sup>1</sup>H NMR (400 MHz, DMSO-*d*<sub>6</sub>) δ 8.96 (d, *J* = 2.8 Hz, 1H), 8.44 (d, *J* = 8.8 Hz, 1H), 8.08 (dd, *J* = 8.8, 2.4 Hz, 1H), 7.59 – 7.23 (m, 9H), 6.15 (s, 2H), 5.31 (s, 2H). <sup>13</sup>C NMR (100 MHz, DMSO-*d*<sub>6</sub>) δ 170.6, 160.1, 141.7, 135.6, 135.1, 131.9, 131.4, 130.23, 130.16, 128.8, 128.2, 126.9, 121.4, 116.5, 65.8, 60.8. HRMS (ESI) *m/z* calcd for C<sub>20</sub>H<sub>17</sub>BrNO<sub>3</sub> [M – Br]<sup>+</sup>: 398.0386, found: 398.0386.

**1-benzyl-2-(((4-fluorobenzyl)oxy)carbonyl)-5-hydroxypyridin-1-ium (1g):** 401.5 mg, 96% yield, white solid, m.p. = 136.1 – 137.7 °C. <sup>1</sup>H NMR (400 MHz, DMSO-*d*<sub>6</sub>) δ 9.00 (d, *J* = 2.4 Hz, 1H), 8.43 (d, *J* = 8.8 Hz, 1H), 8.10 (dd, *J* = 8.8, 2.4 Hz, 1H), 7.44 – 7.21 (m, 9H), 6.16 (s, 2H), 5.32 (s, 2H). <sup>13</sup>C NMR (100 MHz, DMSO-*d*<sub>6</sub>) δ 162.2 (d, *J* = 243.5 Hz), 159.4, 159.3, 138.2, 134.2, 132.3, 132.2, 131.2, 131.0 (d, *J* = 8.4 Hz), 130.7 (d, *J* = 3.1 Hz), 128.9, 128.8, 127.7, 115.4 (d, *J* = 21.4 Hz), 67.8, 62.1. HRMS (ESI) *m/z* calcd for C<sub>20</sub>H<sub>17</sub>FNO<sub>3</sub> [M – Br]<sup>+</sup>: 338.1187, found: 338.1184.

**1-benzyl-2-(((4-chlorobenzyl)oxy)carbonyl)-5-hydroxypyridin-1-ium (1h):** 391.2 mg, 90% yield, white solid, m.p. = 136.9 – 138.3 °C. <sup>1</sup>H NMR (400 MHz, DMSO-*d*<sub>6</sub>) δ 7.97 (d, *J* = 9.6 Hz, 1H), 7.91 (d, *J* = 2.8 Hz, 1H), 7.48 – 7.28 (m, 7H), 7.22 – 7.14 (m, 2H), 6.89 (dd, *J* = 9.2, 2.8 Hz, 1H), 5.96 (s, 2H), 5.22 (s, 2H). <sup>13</sup>C NMR (100 MHz, DMSO-*d*<sub>6</sub>) δ 170.5, 160.1, 141.7, 135.6, 134.6, 132.9, 131.9, 130.2, 130.0, 128.8, 128.5, 128.2, 126.9, 116.6, 65.8, 60.8. HRMS (ESI) *m/z* calcd for C<sub>20</sub>H<sub>17</sub>ClNO<sub>3</sub> [M – Br]<sup>+</sup>: 354.0891, found: 354.0894.

**1-benzyl-5-hydroxy-2-(((4-methylbenzyl)oxy)carbonyl)pyridin-1-ium (1i):** 401.9 mg, 97% yield,

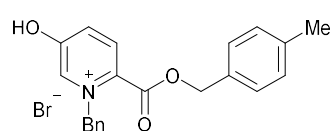

white solid, m.p. = 122.8 – 124.1 °C. <sup>1</sup>H NMR (400 MHz, DMSO-*d*<sub>6</sub>) δ 7.93 (d, *J* = 9.6 Hz, 1H), 7.89 (d, *J* = 2.8 Hz, 1H), 7.39 – 7.30 (m, 3H), 7.26 – 7.14 (m, 6H), 6.88 (dd, *J* = 9.6, 2.8 Hz, 1H), 5.96 (s, 2H), 5.18 (s, 2H), 2.30 (s, 3H). <sup>13</sup>C NMR (100 MHz, DMSO-*d*<sub>6</sub>) δ 170.5, 160.2,

141.5, 137.6, 135.6, 132.5, 131.8, 130.2, 129.0, 128.8, 128.5, 128.2, 127.0, 116.8, 66.6, 60.7, 20.8. HRMS (ESI) *m/z* calcd for C<sub>21</sub>H<sub>20</sub>NO<sub>3</sub> [M – Br]<sup>+</sup>: 334.1438, found: 334.1434.

**1-benzyl-5-hydroxy-2-(((3-methylbenzyl)oxy)carbonyl)pyridin-1-ium (1j):** 389.4 mg, 94% yield,

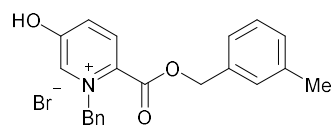

white solid, m.p. = 97.8 – 99.2 °C. <sup>1</sup>H NMR (400 MHz, DMSO-*d*<sub>6</sub>) δ 7.95 (d, *J* = 9.2 Hz, 1H), 7.90 (d, *J* = 2.8 Hz, 1H), 7.40 – 7.09 (m, 9H), 6.88 (dd, *J* = 9.6, 2.8 Hz, 1H), 5.97 (s, 2H), 5.19 (s, 2H), 2.29 (s, 3H). <sup>13</sup>C NMR (100 MHz, DMSO-*d*<sub>6</sub>) δ 170.5, 160.2, 141.6, 137.7, 135.6,

135.5, 131.9, 130.2, 128.9, 128.8, 128.7, 128.4, 128.2, 127.0, 125.2, 116.7, 66.6, 60.8, 20.9. HRMS (ESI) *m/z* calcd for C<sub>21</sub>H<sub>20</sub>NO<sub>3</sub> [M – Br]<sup>+</sup>: 334.1438, found: 334.1437.

**1-benzyl-2-(((3-bromobenzyl)oxy)carbonyl)-5-hydroxypyridin-1-ium (1k):** 436.0 mg, 91% yield,

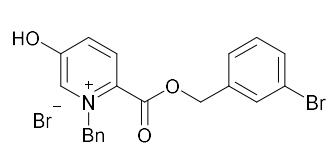

white solid, m.p. = 127.8 – 129.2 °C. <sup>1</sup>H NMR (400 MHz, DMSO-*d*<sub>6</sub>) δ 7.98 (d, *J* = 9.6 Hz, 1H), 7.91 (d, *J* = 2.8 Hz, 1H), 7.59 (t, *J* = 1.6 Hz, 1H), 7.54 (dt, *J* = 7.2, 2.0 Hz, 1H), 7.33 (m, 5H), 7.24 – 7.14 (m, 2H), 6.89 (dd, *J* = 9.6, 2.8 Hz, 1H), 5.96 (s, 2H), 5.22 (s, 2H). <sup>13</sup>C NMR (100

MHz, DMSO-*d*<sub>6</sub>) δ 170.6, 160.1, 141.7, 138.3, 135.6, 132.0, 131.1, 130.8, 130.7, 130.2, 128.8, 128.3, 127.1, 126.9, 121.7, 116.4, 65.7, 60.8. HRMS (ESI) *m/z* calcd for C<sub>20</sub>H<sub>17</sub>BrNO<sub>3</sub> [M – Br]<sup>+</sup>: 398.0386, found: 398.0392.

**1-benzyl-2-(((2,3-dimethoxybenzyl)oxy)carbonyl)-5-hydroxypyridin-1-ium (1l):** 395.9 mg, 86%

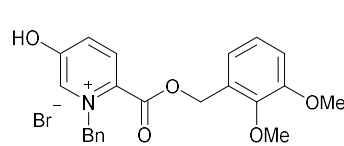

yield, white solid, m.p. = 129.7 – 131.1 °C. <sup>1</sup>H NMR (400 MHz, DMSO-*d*<sub>6</sub>) δ 7.94 – 7.89 (m, 2H), 7.37 – 7.31 (m, 3H), 7.22 – 7.17 (m, 2H), 7.08 – 7.02 (m, 2H), 6.91 – 6.86 (m, 2H), 5.97 (s, 2H), 5.22 (s, 2H), 3.81 (s, 3H), 3.68 (s, 3H). <sup>13</sup>C NMR (100 MHz, DMSO-*d*<sub>6</sub>) δ

170.4, 160.1, 152.3, 146.9, 141.5, 135.5, 131.8, 130.2, 128.8, 128.7, 128.2, 127.0, 124.0, 121.3, 116.8, 113.4, 62.1, 60.7, 60.4, 55.7. HRMS (ESI) *m/z* calcd for C<sub>22</sub>H<sub>22</sub>NO<sub>5</sub> [M – Br]<sup>+</sup>: 380.1492, found: 380.1492.

**1-benzyl-5-hydroxy-2-(methoxycarbonyl)pyridin-1-ium (1m):** 314.4 mg, 97% yield, white solid, m.p.

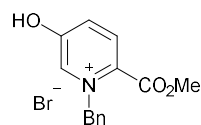

= 125.2 – 126.5 °C. <sup>1</sup>H NMR (400 MHz, DMSO-*d*<sub>6</sub>) δ 7.93 (d, *J* = 9.2 Hz, 1H), 7.87 (d, *J* = 2.8 Hz, 1H), 7.39 – 7.33 (m, 3H), 7.26 – 7.19 (m, 2H), 6.89 (dd, *J* = 9.2, 2.8 Hz, 1H), 5.95 (s, 2H), 3.74 (s, 3H). <sup>13</sup>C NMR (100 MHz, DMSO-*d*<sub>6</sub>) δ 170.4, 160.8, 141.4, 135.7, 131.8, 130.2, 128.8, 128.3, 127.0, 116.9, 60.8, 52.5. HRMS

(ESI) *m/z* calcd for C<sub>14</sub>H<sub>14</sub>NO<sub>3</sub> [M – Br]<sup>+</sup>: 244.0968, found: 244.0967.

**1-benzyl-2-(ethoxycarbonyl)-5-hydroxypyridin-1-ium (1n):** 321.3mg, 95% yield, white solid, m.p. =

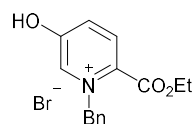

126.0 – 126.9 °C. <sup>1</sup>H NMR (400 MHz, DMSO-*d*<sub>6</sub>) δ 7.92 (d, *J* = 9.2 Hz, 1H), 7.87 (d, *J* = 2.8 Hz, 1H), 7.39 – 7.32 (m, 3H), 7.22 – 7.20 (m, 2H), 6.89 (dd, *J* = 9.6, 2.8 Hz, 1H), 5.95 (s, 2H), 4.18 (q, *J* = 7.2 Hz, 2H), 1.19 (t, *J* = 7.2 Hz, 3H). <sup>13</sup>C NMR (100 MHz, DMSO-*d*<sub>6</sub>) δ 170.5, 160.4, 141.3, 135.7, 131.7, 130.3, 128.8, 128.2,

127.0, 117.1, 61.3, 60.7, 13.9. HRMS (ESI) *m/z* calcd for C<sub>15</sub>H<sub>16</sub>NO<sub>3</sub> [M – Br]<sup>+</sup>: 258.1125, found: 258.1122.

**1-benzyl-5-hydroxy-2-(isopropoxycarbonyl)pyridin-1-ium (1o):** 313.5 mg, 89% yield, white solid, m.p. = 122.9 – 124.3 °C. <sup>1</sup>H NMR (400 MHz, DMSO-*d*<sub>6</sub>) δ 8.94 (d, *J* = 2.8 Hz, 1H), 8.36 (d, *J* = 9.2 Hz, 1H), 8.07 (dd, *J* = 8.8, 2.8 Hz, 1H), 7.46 – 7.19 (m, 5H), 6.13 (s, 2H), 5.07 (m, 1H), 1.18 (d, *J* = 6.4 Hz, 6H). <sup>13</sup>C NMR (100 MHz, DMSO-*d*<sub>6</sub>) δ 170.5, 160.0, 141.1, 135.7, 131.6, 130.3, 128.8, 128.2, 126.9, 117.5, 69.1, 60.8, 21.3. HRMS (ESI) *m/z* calcd for C<sub>16</sub>H<sub>18</sub>NO<sub>3</sub> [M – Br]<sup>+</sup>: 272.1281, found: 272.1281.

**1-benzyl-2-(*tert*-butoxycarbonyl)-5-hydroxypyridin-1-ium (1p):** 333.3 mg, 91% yield, white solid, m.p. = 136.3 – 137.2 °C. <sup>1</sup>H NMR (400 MHz, DMSO-*d*<sub>6</sub>) δ 8.88 (d, *J* = 2.8 Hz, 1H), 8.33 (d, *J* = 8.8 Hz, 1H), 8.01 (dd, *J* = 8.8, 2.4 Hz, 1H), 7.40 (m, 3H), 7.26 – 7.18 (m, 2H), 6.10 (s, 2H), 1.39 (s, 9H). <sup>13</sup>C NMR (100 MHz, DMSO-*d*<sub>6</sub>) δ 170.3, 160.0, 140.7, 135.7, 131.6, 130.4, 128.8, 128.3, 127.0, 118.6, 82.5, 60.7, 27.5. HRMS (ESI) *m/z* calcd for C<sub>17</sub>H<sub>20</sub>NO<sub>3</sub> [M – Br]<sup>+</sup>: 286.1438, found: 286.1433.

**1-benzyl-2-((cyclopropylmethoxy)carbonyl)-5-hydroxypyridin-1-ium (1q):** 331.5 mg, 91% yield, white solid, m.p. = 125.9 – 127.4 °C. <sup>1</sup>H NMR (400 MHz, DMSO-*d*<sub>6</sub>) δ 8.99 (d, *J* = 2.8 Hz, 1H), 8.40 (d, *J* = 8.8 Hz, 1H), 8.13 (dd, *J* = 8.8, 2.8 Hz, 1H), 7.44 – 7.24 (m, 5H), 6.15 (s, 2H), 4.11 (d, *J* = 7.2 Hz, 2H), 1.09 (m, 1H), 0.57 – 0.45 (m, 2H), 0.29 (m, 2H). <sup>13</sup>C NMR (100 MHz, DMSO-*d*<sub>6</sub>) δ 159.7, 159.1, 138.0, 134.2, 133.0, 131.9, 131.3, 129.0, 128.8, 127.8, 72.0, 62.1, 9.2, 3.3. HRMS (ESI) *m/z* calcd for C<sub>17</sub>H<sub>18</sub>NO<sub>3</sub> [M – Br]<sup>+</sup>: 284.1281, found: 284.1280.

**1-benzyl-2-((cyclopentylmethoxy)carbonyl)-5-hydroxypyridin-1-ium (1r):** 364.8 mg, 93% yield, white solid, m.p. = 147.8 – 148.5 °C. <sup>1</sup>H NMR (400 MHz, DMSO-*d*<sub>6</sub>) δ 9.00 (d, *J* = 2.8 Hz, 1H), 8.39 (d, *J* = 8.8 Hz, 1H), 8.14 (dd, *J* = 8.8, 2.4 Hz, 1H), 7.43 – 7.22 (m, 5H), 6.16 (s, 2H), 4.14 (d, *J* = 7.2 Hz, 2H), 2.18 – 2.07 (m, 1H), 1.67 – 1.41 (m, 6H), 1.21 – 1.08 (m, 2H). <sup>13</sup>C NMR (100 MHz, DMSO-*d*<sub>6</sub>) δ 159.6, 159.1, 138.1, 134.2, 132.8, 131.9, 131.3, 128.9, 128.8, 127.7, 70.6, 62.1, 37.6, 28.6, 24.8. HRMS (ESI) *m/z* calcd for C<sub>19</sub>H<sub>22</sub>NO<sub>3</sub> [M – Br]<sup>+</sup>: 312.1594, found: 312.1597.

**1-benzyl-2-((cyclohexylmethoxy)carbonyl)-5-hydroxypyridin-1-ium (1s):** 386.0 mg, 95% yield, white solid, m.p. = 147.4 – 148.9 °C. <sup>1</sup>H NMR (400 MHz, DMSO-*d*<sub>6</sub>) δ 8.98 (d, *J* = 2.4 Hz, 1H), 8.40 (d, *J* = 9.2 Hz, 1H), 8.11 (dd, *J* = 8.4, 2.4 Hz, 1H), 7.44 – 7.20 (m, 5H), 6.15 (s, 2H), 4.07 (d, *J* = 6.0 Hz, 2H), 1.69 – 1.50 (m, 6H), 1.14 (m, 3H), 0.97 – 0.79 (m, 2H). <sup>13</sup>C NMR (100 MHz, DMSO-*d*<sub>6</sub>) δ 159.5, 159.3, 138.2, 134.3, 132.5, 132.0, 131.3, 128.9, 128.7, 127.5, 71.7, 62.1, 36.2, 28.7, 25.7, 25.1. HRMS (ESI) *m/z* calcd for C<sub>20</sub>H<sub>24</sub>NO<sub>3</sub> [M – Br]<sup>+</sup>: 326.1751, found: 326.1752.

**2-((benzyloxy)carbonyl)-1-(4-cyanobenzyl)-5-hydroxypyridin-1-ium (1t):** 399.8 mg, 94% yield, white solid, m.p. = 139.7 – 142.6 °C. <sup>1</sup>H NMR (400 MHz, DMSO-*d*<sub>6</sub>) δ 9.02 (s, 1H), 8.49 (d, *J* = 8.8 Hz, 1H), 8.13 (d, *J* = 9.2 Hz, 1H), 7.82 (d, *J* = 7.6 Hz, 2H), 7.41 – 7.32 (m, 7H), 6.25 (s, 2H), 5.31 (s, 2H). <sup>13</sup>C NMR (100 MHz, DMSO-*d*<sub>6</sub>) δ 159.7, 159.1, 139.9, 138.9, 134.4, 132.6, 132.5, 132.2, 131.5, 128.6, 128.5, 128.5, 128.0, 118.4, 111.1, 68.5, 61.9. HRMS (ESI) *m/z* calcd for C<sub>21</sub>H<sub>17</sub>N<sub>2</sub>O<sub>3</sub> [M – Br]<sup>+</sup>: 345.1234, found: 345.1232.

**2-((benzyloxy)carbonyl)-5-hydroxy-1-(4-(methoxycarbonyl)benzyl)pyridin-1-ium (1u):** 412.5 mg,

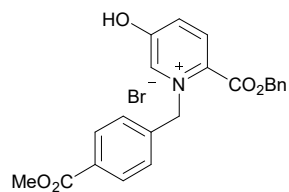

90% yield, white solid, m.p. = 114.8 – 116.1 °C. <sup>1</sup>H NMR (400 MHz, DMSO-*d*<sub>6</sub>) δ 8.94 (d, *J* = 2.8 Hz, 1H), 8.44 (d, *J* = 9.2 Hz, 1H), 8.05 (dd, *J* = 9.2, 2.4 Hz, 1H), 7.91 (d, *J* = 8.0 Hz, 2H), 7.34 (m, 7H), 6.21 (s, 2H), 5.29 (s, 2H), 3.86 (s, 3H). <sup>13</sup>C NMR (100 MHz, DMSO-*d*<sub>6</sub>) δ 165.7, 160.0, 159.2, 139.6, 138.9, 134.4, 132.3, 131.7, 131.4, 129.6, 128.6, 128.5, 128.5, 127.5

(2C), 68.4, 62.0, 52.3. HRMS (ESI) *m/z* calcd for C<sub>22</sub>H<sub>20</sub>NO<sub>5</sub> [M + Na]<sup>+</sup>: 378.1336, found: 378.1344.

**2-((benzyloxy)carbonyl)-5-hydroxy-1-(4-nitrobenzyl)pyridin-1-ium (1v):** 427.5 mg, 96% yield,

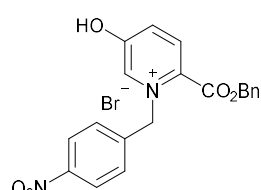

white solid, m.p. = 141.6 – 143.4 °C. <sup>1</sup>H NMR (400 MHz, DMSO-*d*<sub>6</sub>) δ 9.08 (d, *J* = 2.8 Hz, 1H), 8.52 (d, *J* = 9.2 Hz, 1H), 8.16 (m, 3H), 7.47 (d, *J* = 8.4 Hz, 2H), 7.32 (m, 5H), 6.32 (s, 2H), 5.30 (s, 2H). <sup>13</sup>C NMR (100 MHz, DMSO-*d*<sub>6</sub>) δ 159.9, 159.1, 147.2, 141.9, 139.1, 134.4, 132.5, 132.0, 131.6, 128.5, 128.5, 128.4, 128.3, 123.7, 68.5, 61.8. HRMS (ESI) *m/z* calcd for C<sub>20</sub>H<sub>17</sub>N<sub>2</sub>O<sub>5</sub> [M – Br]<sup>+</sup>: 365.1132, found: 365.1132.

**2-((benzyloxy)carbonyl)-5-hydroxy-1-(4-(trifluoromethyl)benzyl)pyridin-1-ium (1w):** 416.8 mg, 89%

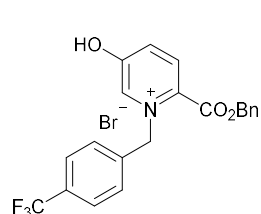

yield, white solid, m.p. = 132.9 – 134.6 °C. <sup>1</sup>H NMR (400 MHz, DMSO-*d*<sub>6</sub>) δ 9.00 (d, *J* = 2.4 Hz, 1H), 8.48 (d, *J* = 9.2 Hz, 1H), 8.11 (dd, *J* = 9.2, 2.8 Hz, 1H), 7.72 (d, *J* = 8.0 Hz, 2H), 7.45 (d, *J* = 8.0 Hz, 2H), 7.35 (m, 5H), 6.25 (s, 2H), 5.32 (s, 2H). <sup>13</sup>C NMR (100 MHz, DMSO-*d*<sub>6</sub>) δ 159.8, 159.2, 139.1, 138.9, 134.4, 132.4, 132.0, 131.5, 128.9 (q, *J* = 32.0 Hz), 128.6, 128.5 (2C), 128.1, 125.7 (q, *J* = 3.8 Hz), 124.0 (q, *J* = 270.5 Hz), 68.5, 61.8. HRMS (ESI)

*m/z* calcd for C<sub>21</sub>H<sub>17</sub>F<sub>3</sub>NO<sub>3</sub> [M – Br]<sup>+</sup>: 388.1155, found: 388.1154.

**2-((benzyloxy)carbonyl)-5-hydroxy-1-(4-methylbenzyl)pyridin-1-ium (1x):** 372.9 mg, 90% yield,

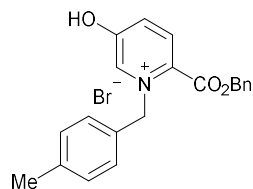

white solid, m.p. = 135.8 – 137.3 °C. <sup>1</sup>H NMR (400 MHz, DMSO-*d*<sub>6</sub>) δ 8.96 (d, *J* = 2.4 Hz, 1H), 8.41 (d, *J* = 8.8 Hz, 1H), 8.07 (dd, *J* = 8.8, 2.4 Hz, 1H), 7.38 (m, 5H), 7.17 (m, 4H), 6.10 (s, 2H), 5.34 (s, 2H), 2.28 (s, 3H). <sup>13</sup>C NMR (100 MHz, DMSO-*d*<sub>6</sub>) δ 159.5, 159.3, 138.4, 138.0, 134.4, 132.4, 132.0, 131.1, 131.1, 129.5, 128.6, 128.5 (2C), 128.0, 68.6, 61.9, 20.7. HRMS (ESI) *m/z* calcd for C<sub>21</sub>H<sub>20</sub>NO<sub>3</sub> [M – Br]<sup>+</sup>: 334.1438, found: 334.1443.

**2-((benzyloxy)carbonyl)-1-(4-bromobenzyl)-5-hydroxypyridin-1-ium (1y):** 460.0 mg, 96% yield,

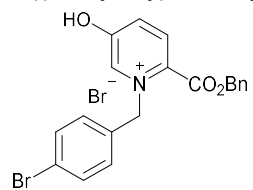

white solid, m.p. = 122.5 – 124.0 °C. <sup>1</sup>H NMR (400 MHz, DMSO-*d*<sub>6</sub>) δ 8.96 (d, *J* = 2.8 Hz, 1H), 8.44 (d, *J* = 8.8 Hz, 1H), 8.08 (dd, *J* = 9.2, 2.8 Hz, 1H), 7.57 (d, *J* = 8.4 Hz, 2H), 7.41 – 7.31 (m, 5H), 7.22 (d, *J* = 8.2 Hz, 2H), 6.12 (s, 2H), 5.34 (s, 2H). <sup>13</sup>C NMR (100 MHz, DMSO-*d*<sub>6</sub>) δ 159.5, 159.3, 138.5, 134.4, 133.7, 132.2, 132.1, 131.8, 131.3, 129.9, 128.6, 128.5, 128.5, 122.1, 68.5, 61.6.

HRMS (ESI) *m/z* calcd for C<sub>20</sub>H<sub>17</sub>BrNO<sub>3</sub> [M – Br]<sup>+</sup>: 398.0386, found: 398.0395.

**2-((benzyloxy)carbonyl)-1-(4-chlorobenzyl)-5-hydroxypyridin-1-ium (1z):** 400.0 mg, 92% yield,

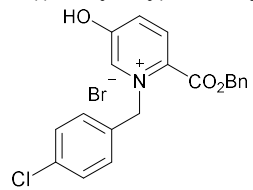

white solid, m.p. = 128.4 – 129.7 °C. <sup>1</sup>H NMR (400 MHz, DMSO-*d*<sub>6</sub>) δ 8.99 (d, *J* = 2.4 Hz, 1H), 8.44 (d, *J* = 8.8 Hz, 1H), 8.10 (dd, *J* = 8.8, 2.4 Hz, 1H), 7.47 – 7.25 (m, 9H), 6.15 (s, 2H), 5.34 (s, 2H). <sup>13</sup>C NMR (100 MHz, DMSO-*d*<sub>6</sub>) δ 159.6, 159.3, 138.5, 134.4, 133.5, 133.2, 132.3, 132.0, 131.3, 129.7, 128.9, 128.6, 128.5, 128.5, 68.5, 61.5. HRMS (ESI) *m/z* calcd for C<sub>20</sub>H<sub>17</sub>ClNO<sub>3</sub> [M – Br]<sup>+</sup>: 354.0891, found: 354.0889.

**2-((benzyloxy)carbonyl)-1-(2-bromobenzyl)-5-hydroxypyridin-1-ium (1aa):** 440.8 mg, 92% yield,

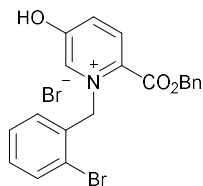

white solid, m.p. = 124.7 – 125.9 °C. <sup>1</sup>H NMR (400 MHz, Chloroform-*d*) δ 8.85 (s, 1H), 8.53 (dd, *J* = 9.2, 2.8 Hz, 1H), 8.12 (d, *J* = 8.8 Hz, 1H), 7.75 – 7.72 (m, 1H), 7.37 – 7.31 (m, 7H), 6.74 (q, *J* = 4.0 Hz, 1H), 6.16 (s, 2H), 5.29 (s, 2H). <sup>13</sup>C NMR (100 MHz, Chloroform-*d*) δ 159.9, 158.9, 140.3, 138.9, 134.4, 134.2, 132.9, 132.5, 132.2, 131.8, 130.1, 128.54, 128.51, 128.3, 127.3, 121.3, 68.4, 62.9. HRMS (ESI)

*m/z* calcd for C<sub>20</sub>H<sub>17</sub>BrNO<sub>3</sub> [M – Br]<sup>+</sup>: 398.0386, found: 398.0390.

**2-((benzyloxy)carbonyl)-1-(3,5-dimethylbenzyl)-5-hydroxypyridin-1-ium (1ab):** 389.8 mg, 91%

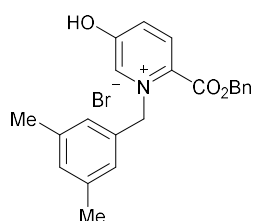

yield, white solid, m.p. = 132.4 – 133.9 °C. <sup>1</sup>H NMR (400 MHz, DMSO-*d*<sub>6</sub>) δ 7.96 (d, *J* = 9.2 Hz, 1H), 7.88 – 7.81 (d, *J* = 2.8 Hz, 1H), 7.35 (m, 5H), 6.95 (s, 1H), 6.88 (dd, *J* = 9.2, 2.4 Hz, 1H), 6.80 (s, 2H), 5.89 (s, 2H), 5.25 (s, 2H), 2.20 (s, 6H). <sup>13</sup>C NMR (100 MHz, DMSO-*d*<sub>6</sub>) δ 170.5, 160.3, 141.5, 137.9, 135.6, 135.5, 131.9, 130.2, 129.7, 128.5, 128.2, 128.0, 124.7, 116.7, 66.6, 60.6, 20.8. HRMS (ESI) *m/z* calcd for C<sub>22</sub>H<sub>22</sub>NO<sub>3</sub> [M – Br]<sup>+</sup>: 348.1594, found:

348.1592.

**2-((benzyloxy)carbonyl)-1-(3,5-dimethoxybenzyl)-5-hydroxypyridin-1-ium (1ac):** 437.3 mg, 95%

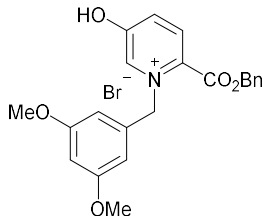

yield, white solid, m.p. = 123.2 – 125.1 °C. <sup>1</sup>H NMR (400 MHz, DMSO-*d*<sub>6</sub>) δ 8.90 (d, *J* = 2.8 Hz, 1H), 8.44 (d, *J* = 8.8 Hz, 1H), 8.08 (dd, *J* = 9.2, 2.8 Hz, 1H), 7.38 (m, 5H), 6.52 (d, *J* = 2.4 Hz, 1H), 6.46 (d, *J* = 2.4 Hz, 2H), 6.08 (s, 2H), 5.37 (s, 2H), 3.71 (s, 6H). <sup>13</sup>C NMR (100 MHz, DMSO-*d*<sub>6</sub>) δ 160.9, 159.5, 159.4, 138.0, 136.2, 134.5, 132.2, 132.0, 131.3, 128.6, 128.5, 128.4, 106.1, 100.1, 68.5, 61.8, 55.4. HRMS (ESI) *m/z* calcd for C<sub>22</sub>H<sub>22</sub>NO<sub>5</sub> [M – Br]<sup>+</sup>: 380.1492, found: 380.1492.

## 2.3 General Procedure for Hydrogenation of pyridinium salts

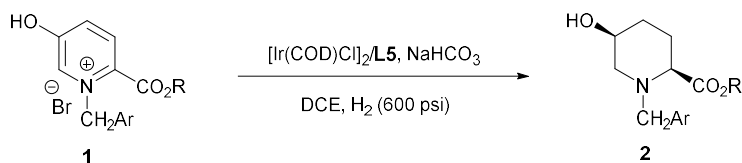

A mixture of [Ir(COD)Cl]<sub>2</sub> (0.7 mg, 1.0 μmol, 1.0 mol%) and (*S*)-ZhaoPhos (**L5**) (1.8 mg, 2.0 μmol, 2.0 mol%) were dissolved in degassed solvent (2.0 mL) at argon atmosphere, and the resulting solution was allowed to stirred for 20 min, followed by the addition of the substrate **1** (0.1 mmol, 1.0 equiv.) and NaHCO<sub>3</sub> (8.4 mg, 0.1 mmol, 1.0 equiv.). The resulting mixture was transferred to an autoclave, which was purged (3 × 50 psi) and charged with H<sub>2</sub> (600 psi), then the reaction mixtures were stirred at room temperature for 48 h. After careful release of the hydrogen gas, the reaction mixture was filtrated and concentrated in vacuo. Flash chromatography on silica gel using petroleum ether/ethyl acetate as the eluent gave the products. The enantiomeric excesses were determined by chiral HPLC.

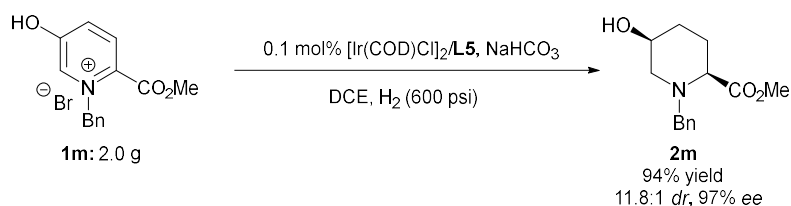

Asymmetric hydrogenation of 2-methyl ester-5-hydroxypyridinium salt (**1m**) at gram scale: A mixture of  $[\text{Ir}(\text{COD})\text{Cl}]_2$  (4.1 mg, 6.2  $\mu\text{mol}$ , 0.1 mol%) and (*S*)-ZhaoPhos (**L5**) (10.8 mg, 12.4  $\mu\text{mol}$ , 0.2 mol%) were dissolved in degassed solvent (80.0 mL) at argon atmosphere, and the resulting solution was allowed to stirred for 20 min, followed by the addition of the substrate **1m** (2.0 g, 6.2 mmol, 1.0 equiv.) and  $\text{NaHCO}_3$  (520.9 mg, 6.2 mmol, 1.0 equiv.). The resulting mixture was transferred to an autoclave, which was purged ( $3 \times 50$  psi) and charged with  $\text{H}_2$  (600 psi), then the reaction mixtures were stirred at room temperature for 48 h. After careful release of the hydrogen gas, the reaction mixture was filtrated and concentrated in vacuo. The residue was purified by silica gel flash column chromatography (petroleum ether/ethyl acetate = 20:1) to give compound **2m** (1.45 g, 94% yield, 11.8:1 *dr*, 97% *ee*) as a colorless oil.

**benzyl (2*S*,5*S*)-1-benzyl-5-hydroxypiperidine-2-carboxylate (2a)**: 31.2 mg, 96% yield, 16.7:1 *dr*, 95%

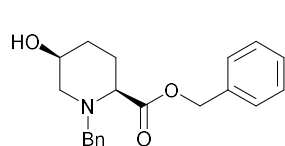

*ee*,  $[\alpha]_D^{25} = -58.9$  ( $c = 1.0$ ,  $\text{CHCl}_3$ ), colorless oil.  $^1\text{H}$  NMR (400 MHz, Chloroform-*d*)  $\delta$  7.43 – 7.19 (m, 10H), 5.17 (s, 2H), 3.81 (d,  $J = 13.2$  Hz, 1H), 3.77 – 3.72 (m, 1H), 3.51 (d,  $J = 13.6$  Hz, 1H), 3.25 (dd,  $J = 7.2$ , 4.4 Hz, 1H), 2.87 (dd,  $J = 11.6$ , 6.8 Hz, 1H), 2.49 (s, 1H), 2.45 (dd,  $J = 11.2$ ,

3.2 Hz, 1H), 2.13 – 2.00 (m, 1H), 1.86 – 1.72 (m, 1H), 1.72 – 1.53 (m, 2H).  $^{13}\text{C}$  NMR (100 MHz, Chloroform-*d*)  $\delta$  173.0, 137.9, 135.8, 129.1, 128.7, 128.4, 128.4, 128.4, 127.3, 66.4, 65.9, 62.8, 59.7, 55.7, 30.1, 25.5. HRMS (ESI)  $m/z$  calcd for  $\text{C}_{20}\text{H}_{23}\text{NNaO}_3$   $[\text{M} + \text{Na}]^+$ : 348.1570, found: 348.1566. HPLC: Chiralcel AD-H column, 254 nm, 30  $^\circ\text{C}$ , *n*-hexane/ethanol = 90/10, flow = 0.5 mL/min, retention time 15.6 min (maj) and 18.9 min.

**4-(methoxycarbonyl)benzyl (2*S*,5*S*)-1-benzyl-5-hydroxypiperidine-2-carboxylate (2b)**: 36.0 mg, 94%

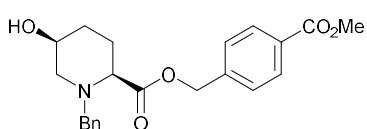

yield, 15.1:1 *dr*, 95% *ee*,  $[\alpha]_D^{25} = -49.7$  ( $c = 1.0$ ,  $\text{CHCl}_3$ ), colorless oil.  $^1\text{H}$  NMR (400 MHz, Chloroform-*d*)  $\delta$  8.03 (d,  $J = 7.2$  Hz, 2H), 7.42 (d,  $J = 7.6$  Hz, 2H), 7.28 – 7.23 (m, 5H), 5.21 (s, 2H), 3.91 (s, 3H), 3.81 (d,  $J = 13.2$  Hz, 1H), 3.78 – 3.70 (m, 1H), 3.54 (d,  $J = 13.2$

Hz, 1H), 3.30 (t,  $J = 5.6$  Hz, 1H), 2.88 (dd,  $J = 11.2$ , 6.4 Hz, 1H), 2.56 – 2.41 (m, 2H), 2.14 – 2.03 (m, 1H), 1.85 – 1.78 (m, 1H), 1.74 – 1.53 (m, 2H).  $^{13}\text{C}$  NMR (100 MHz, Chloroform-*d*)  $\delta$  172.8, 166.7, 140.9, 137.9, 130.1, 130.0, 129.0, 128.4, 127.9, 127.4, 66.0, 65.5, 62.5, 59.7, 55.7, 52.3, 30.1, 25.6. HRMS (ESI)  $m/z$  calcd for  $\text{C}_{22}\text{H}_{25}\text{NNaO}_5$   $[\text{M} + \text{Na}]^+$ : 406.1625, found: 406.1624. HPLC: Chiralcel IA-H column, 254 nm, 30  $^\circ\text{C}$ , *n*-hexane/*i*-propanol = 90/10, flow = 0.7 mL/min, retention time 21.3 min (maj) and 27.0 min.

**4-(trifluoromethyl)benzyl (2*S*,5*S*)-1-benzyl-5-hydroxypiperidine-2-carboxylate (2c)**: 35.4 mg, 90%

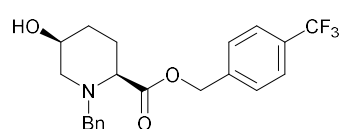

yield, 13.6:1 *dr*, 94% *ee*,  $[\alpha]_D^{25} = -46.4$  ( $c = 1.0$ ,  $\text{CHCl}_3$ ), colorless oil.  $^1\text{H}$  NMR (400 MHz, Chloroform-*d*)  $\delta$  7.62 (d,  $J = 8.0$  Hz, 2H), 7.46 (d,  $J = 8.0$  Hz, 2H), 7.30 – 7.21 (m,  $J = 6.0$ , 5.4 Hz, 5H), 5.21 (s, 2H), 3.81 (d,  $J = 13.2$  Hz, 1H), 3.79 – 3.72 (m, 1H), 3.53 (d,  $J = 13.2$  Hz, 1H),

3.29 (dd,  $J = 6.8$ , 4.4 Hz, 1H), 2.88 (dd,  $J = 11.2$ , 6.4 Hz, 1H), 2.50 – 2.46 (m, 2H), 2.12 – 2.03 (m, 1H), 1.87 – 1.77 (m, 1H), 1.73 – 1.54 (m, 2H).  $^{13}\text{C}$  NMR (100 MHz, Chloroform-*d*)  $\delta$  172.8, 139.9, 137.9, 130.6 (q,  $J = 32.4$  Hz), 129.0, 128.43, 128.39, 127.4, 125.7 (q,  $J = 3.6$  Hz), 124.7 (q,  $J = 270.5$  Hz), 65.9, 65.4, 62.7, 59.7, 55.8, 30.1, 25.6. HRMS (ESI)  $m/z$  calcd for  $\text{C}_{21}\text{H}_{22}\text{F}_3\text{NNaO}_3$   $[\text{M} + \text{Na}]^+$ : 416.1444,

found: 416.1439. HPLC: Chiralcel IA-H column, 254 nm, 30 °C, *n*-hexane/*i*-propanol = 90/10, flow = 0.7 mL/min, retention time 12.4 min (maj) and 15.7 min.

**4-nitrobenzyl (2*S*,5*S*)-1-benzyl-5-hydroxypiperidine-2-carboxylate (2d):** 34.4 mg, 93% yield, 14.2:1

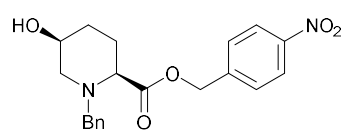

*dr*, 94% *ee*,  $[\alpha]_D^{25} = -61.3$  (*c* = 1.0, CHCl<sub>3</sub>), colorless oil. <sup>1</sup>H NMR (400 MHz, Chloroform-*d*) δ 8.12 (d, *J* = 8.4 Hz, 2H), 7.44 (d, *J* = 8.4 Hz, 2H), 7.37 – 7.33 (m, 5H), 5.22 – 5.13 (m, 2H), 3.89 – 3.92 (m, 1H), 3.81 – 3.73 (m, 1H), 3.65 – 3.61 (m, 1H), 3.37 – 3.28 (m, 1H),

2.84 (dd, *J* = 11.6, 6.4 Hz, 1H), 2.53 – 2.50 (m, 1H), 2.24 (s, 1H), 2.18 – 2.07 (m, 1H), 1.92 – 1.79 (m, 1H), 1.79 – 1.69 (m, 1H), 1.60 – 1.51 (m, 1H). <sup>13</sup>C NMR (100 MHz, Chloroform-*d*) δ 172.6, 147.4, 135.7, 129.4, 128.8, 128.6, 128.5, 123.7, 66.6, 66.2, 62.5, 59.0, 55.8, 30.0, 25.7. HRMS (ESI) *m/z* calcd for C<sub>20</sub>H<sub>22</sub>N<sub>2</sub>NaO<sub>5</sub> [*M* + Na]<sup>+</sup>: 393.1421, found: 393.1418. HPLC: Chiralcel IA-H column, 254 nm, 30 °C, *n*-hexane/*i*-propanol = 90/10, flow = 0.7 mL/min, retention time 66.9 min (maj) and 89.9 min.

**4-cyanobenzyl (2*S*,5*S*)-1-benzyl-5-hydroxypiperidine-2-carboxylate (2e):** 31.9 mg, 91% yield, 12.6:1

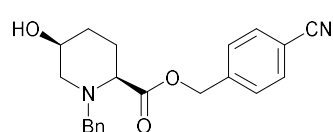

*dr*, 95% *ee*,  $[\alpha]_D^{25} = -51.3$  (*c* = 1.0, CHCl<sub>3</sub>), colorless oil. <sup>1</sup>H NMR (400 MHz, Chloroform-*d*) δ 7.65 (d, *J* = 7.6 Hz, 2H), 7.46 (d, *J* = 8.0 Hz, 2H), 7.31 – 7.25 (m, 5H), 5.20 (s, 2H), 3.80 (d, *J* = 13.6 Hz, 1H), 3.77 – 3.74 (m, 1H), 3.53 (d, *J* = 13.2 Hz, 1H), 3.30 (t, *J* = 6.0 Hz, 1H), 2.88

(dd, *J* = 11.6, 6.4 Hz, 1H), 2.51 – 2.43 (m, 2H), 2.17 – 2.02 (m, 1H), 1.86 – 1.80 (m, 1H), 1.72 – 1.69 (m, 1H), 1.68 – 1.54 (m, 1H). <sup>13</sup>C NMR (100 MHz, Chloroform-*d*) δ 172.7, 141.1, 137.8, 132.5, 128.9, 128.5, 128.4, 127.4, 118.5, 112.3, 65.9, 65.1, 62.6, 59.7, 55.7, 30.0, 25.6. HRMS (ESI) *m/z* calcd for C<sub>21</sub>H<sub>22</sub>N<sub>2</sub>NaO<sub>3</sub> [*M* + Na]<sup>+</sup>: 373.1523, found: 373.1520. HPLC: Chiralcel IA-H column, 254 nm, 30 °C, *n*-hexane/*i*-propanol = 95/5, flow = 0.7 mL/min, retention time 70.6 min (maj) and 92.3 min.

**4-bromobenzyl (2*S*,5*S*)-1-benzyl-5-hydroxypiperidine-2-carboxylate (2f):** 35.6 mg, 88% yield,

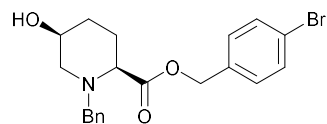

15.4:1 *dr*, 94% *ee*,  $[\alpha]_D^{25} = -59.6$  (*c* = 1.0, CHCl<sub>3</sub>), colorless oil. <sup>1</sup>H NMR (400 MHz, Chloroform-*d*) δ 7.49 – 7.47 (m, 2H), 7.33 – 7.18 (m, 7H), 5.10 (s, 2H), 3.79 (d, *J* = 13.2 Hz, 1H), 3.76 – 3.72 (m, 1H), 3.51 (d, *J* = 13.6 Hz, 1H), 3.25 (dd, *J* = 6.8, 4.4 Hz, 1H), 2.86 (dd, *J* = 11.2,

6.8 Hz, 1H), 2.49 (s, 1H), 2.46 (dd, *J* = 11.2, 3.3 Hz, 1H), 2.12 – 2.01 (m, 1H), 2.09 – 2.01 (m, 1H), 1.73 – 1.50 (m, 2H). <sup>13</sup>C NMR (100 MHz, Chloroform-*d*) δ 172.9, 137.9, 134.9, 131.8, 130.1, 129.0, 128.4, 127.4, 122.5, 65.9, 65.5, 62.7, 59.7, 55.7, 30.0, 25.5. HRMS (ESI) *m/z* calcd for C<sub>20</sub>H<sub>23</sub>BrNO<sub>3</sub> [*M* + H]<sup>+</sup>: 404.0856, found: 404.0857. HPLC: Chiralcel IA-H column, 254 nm, 30 °C, *n*-hexane/*i*-propanol = 90/10, flow = 0.7 mL/min, retention time 18.8 min (maj) and 23.7 min.

**4-fluorobenzyl (2*S*,5*S*)-1-benzyl-5-hydroxypiperidine-2-carboxylate (2g):** 28.5 mg, 83% yield,

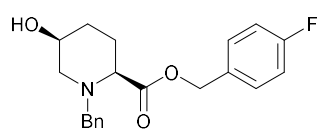

13.8:1 *dr*, 96% *ee*,  $[\alpha]_D^{25} = -44.8$  (*c* = 0.5, CHCl<sub>3</sub>), colorless oil. <sup>1</sup>H NMR (400 MHz, Chloroform-*d*) δ 7.40 – 7.21 (m, 7H), 7.06 – 7.02 (m, 2H), 5.13 (s, 2H), 3.79 (d, *J* = 13.2 Hz, 1H), 3.76 – 3.73 (m, 1H), 3.50 (d, *J* = 13.2 Hz, 1H), 3.24 (dd, *J* = 7.2, 4.4 Hz, 1H), 2.87 (dd, *J* = 11.2,

6.4 Hz, 1H), 2.47 (s, 1H), 2.45 (dd, *J* = 11.2, 3.2 Hz, 1H), 2.12 – 1.98 (m, 1H), 1.79 (m, 1H), 1.71 – 1.53 (m, 2H). <sup>13</sup>C NMR (100 MHz, Chloroform-*d*) δ 172.9, 162.8 (d, *J* = 245.6 Hz), 137.8, 131.7 (d, *J* = 3.3 Hz), 130.5 (d, *J* = 8.2 Hz), 129.0, 128.4, 127.4, 115.7 (d, *J* = 21.5 Hz), 65.9, 65.7, 62.8, 59.7, 55.8, 30.1, 25.5. HRMS (ESI) *m/z* calcd for C<sub>20</sub>H<sub>22</sub>FNNO<sub>3</sub> [*M* + Na]<sup>+</sup>: 366.1476, found: 366.1477. HPLC: Chiralcel IA-H column, 254 nm, 30 °C, *n*-hexane/*i*-propanol = 95/5, flow = 0.5 mL/min, retention time 30.9 min (maj) and 41.9 min.



**4-chlorobenzyl (2*S*,5*S*)-1-benzyl-5-hydroxypiperidine-2-carboxylate (2h):** 32.4 mg, 90% yield,

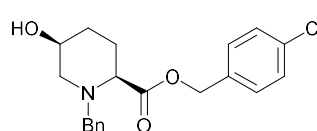

11.6:1 *dr*, 94% *ee*,  $[\alpha]_D^{25} = -52.1$  (*c* = 1.0, CHCl<sub>3</sub>), colorless oil. <sup>1</sup>H NMR (400 MHz, Chloroform-*d*)  $\delta$  7.38 – 7.15 (m, 9H), 5.12 (s, 2H), 3.79 (d, *J* = 13.6 Hz, 1H), 3.75 – 3.72 (m, 1H), 3.51 (d, *J* = 13.2 Hz, 1H), 3.25 (dd, *J* = 7.2, 4.4 Hz, 1H), 2.86 (dd, *J* = 11.6, 6.8 Hz, 1H),

2.52 (s, 1H), 2.46 (dd, *J* = 11.6, 3.6 Hz, 1H), 2.12 – 1.99 (m, 1H), 1.86 – 1.72 (m, 1H), 1.71 – 1.51 (m, 2H). <sup>13</sup>C NMR (100 MHz, Chloroform-*d*)  $\delta$  172.9, 137.9, 134.4, 134.3, 129.8, 129.0, 128.9, 128.4, 127.3, 65.9, 65.5, 62.7, 59.7, 55.7, 30.0, 25.5. HRMS (ESI) *m/z* calcd for C<sub>20</sub>H<sub>22</sub>ClNNaO<sub>3</sub> [*M* + Na]<sup>+</sup>: 382.1180, found: 382.1185. HPLC: Chiralcel AD-H column, 254 nm, 30 °C, *n*-hexane/*i*-propanol = 95/5, flow = 0.5 mL/min, retention time 49.4 min (maj) and 67.1 min.

**4-methylbenzyl (2*S*,5*S*)-1-benzyl-5-hydroxypiperidine-2-carboxylate (2i):** 31.2 mg, 92% yield,

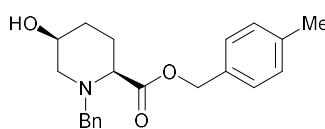

14.2:1 *dr*, 97% *ee*,  $[\alpha]_D^{25} = -59.6$  (*c* = 1.0, CHCl<sub>3</sub>), colorless oil. <sup>1</sup>H NMR (400 MHz, Chloroform-*d*)  $\delta$  7.30 – 7.13 (m, 9H), 5.12 (s, 2H), 3.80 (d, *J* = 13.2 Hz, 1H), 3.75 – 3.70 (m, 1H), 3.51 (d, *J* = 13.6 Hz, 1H), 3.23 (dd, *J* = 7.2, 4.4 Hz, 1H), 2.86 (dd, *J* = 11.2, 6.4 Hz, 1H), 2.50

(s, 1H), 2.44 (dd, *J* = 11.6, 3.6 Hz, 1H), 2.33 (s, 3H), 2.14 – 1.99 (m, 1H), 1.85 – 1.71 (m, 1H), 1.71 – 1.53 (m, 2H). <sup>13</sup>C NMR (100 MHz, Chloroform-*d*)  $\delta$  173.0, 138.3, 138.0, 132.9, 129.3, 129.1, 128.5, 128.3, 127.3, 66.3, 66.0, 62.8, 59.7, 55.7, 30.1, 25.5, 21.3. HRMS (ESI) *m/z* calcd for C<sub>21</sub>H<sub>25</sub>NNaO<sub>3</sub> [*M* + Na]<sup>+</sup>: 362.1727, found: 362.1725. HPLC: Chiralcel OD-H column, 254 nm, 30 °C, *n*-hexane/*i*-propanol = 95/5, flow = 0.5 mL/min, retention time 25.9 min (maj) and 28.0 min.

**3-methylbenzyl (2*S*,5*S*)-1-benzyl-5-hydroxypiperidine-2-carboxylate (2j):** 31.6 mg, 93% yield,

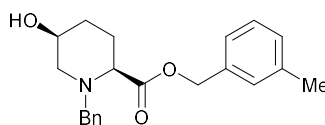

12.8:1 *dr*, 96% *ee*,  $[\alpha]_D^{25} = -56.2$  (*c* = 1.0, CHCl<sub>3</sub>), colorless oil. <sup>1</sup>H NMR (400 MHz, Chloroform-*d*)  $\delta$  7.31 – 7.19 (m, 6H), 7.21 – 7.12 (m, 3H), 5.13 (s, 2H), 3.82 (d, *J* = 13.2 Hz, 1H), 3.77 – 3.72 (m, 1H), 3.51 (d, *J* = 13.2 Hz, 1H), 3.25 (t, *J* = 6.0 Hz, 1H), 2.88 (dd, *J* = 11.6, 6.4 Hz, 1H), 2.55 (s, 1H), 2.44 (dd, *J* = 11.2, 3.2 Hz, 1H), 2.34 (s, 3H), 2.12 – 2.03 (m, 1H), 1.85 – 1.75 (m, 1H),

1.68 – 1.59 (m, 2H). <sup>13</sup>C NMR (100 MHz, Chloroform-*d*)  $\delta$  173.0, 138.4, 137.9, 135.7, 129.2, 129.1, 129.1, 128.6, 128.4, 127.3, 125.5, 66.5, 65.9, 62.9, 59.7, 55.8, 30.1, 25.5, 21.4. HRMS (ESI) *m/z* calcd for C<sub>21</sub>H<sub>25</sub>NNaO<sub>3</sub> [*M* + Na]<sup>+</sup>: 362.1727, found: 362.1730. HPLC: Chiralcel IA-H column, 254 nm, 30 °C, *n*-hexane/*i*-propanol = 95/5, flow = 0.7 mL/min, retention time 16.1 min (maj) and 20.6 min.

**3-bromobenzyl (2*S*,5*S*)-1-benzyl-5-hydroxypiperidine-2-carboxylate (2k):** 34.3 mg, 85% yield,

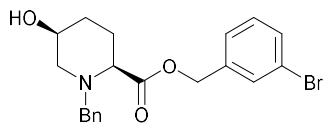

16.7:1 *dr*, 95% *ee*,  $[\alpha]_D^{25} = -43.2$  (*c* = 1.0, CHCl<sub>3</sub>), colorless oil. <sup>1</sup>H NMR (400 MHz, Chloroform-*d*)  $\delta$  7.51 (t, *J* = 2.0 Hz, 1H), 7.46 – 7.43 (m, 1H), 7.33 – 7.18 (m, 7H), 5.11 (s, 2H), 3.80 (d, *J* = 13.2 Hz, 1H), 3.77 – 3.71 (m, 1H), 3.52 (d, *J* = 13.6 Hz, 1H), 3.27 (dd, *J* = 7.2, 4.4 Hz, 1H), 2.87 (dd, *J* = 11.6, 6.8 Hz, 1H), 2.48 (dd, *J* = 11.6, 3.6 Hz, 1H), 2.43 (s, 1H), 2.13 – 2.02 (m, 1H),

1.85 – 1.74 (m, 1H), 1.74 – 1.53 (m, 2H). <sup>13</sup>C NMR (100 MHz, Chloroform-*d*)  $\delta$  172.8, 138.1, 137.9, 131.5, 131.3, 130.3, 129.0, 128.4, 127.4, 126.8, 122.7, 66.0, 65.3, 62.6, 59.7, 55.8, 30.1, 25.6. HRMS (ESI) *m/z* calcd for C<sub>20</sub>H<sub>23</sub>BrNO<sub>3</sub> [*M* + H]<sup>+</sup>: 404.0856, found: 404.0856. HPLC: Chiralcel AD-H column, 254 nm, 30 °C, *n*-hexane/*i*-propanol = 90/10, flow = 0.7 mL/min, retention time 17.6 min (maj) and 25.0 min.

**2,3-dimethoxybenzyl (2S,5S)-1-benzyl-5-hydroxypiperidine-2-carboxylate (2l):** 33.2 mg, 86% yield,

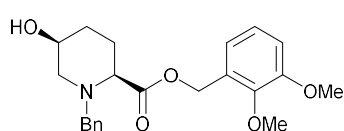

8.4:1 *dr*, 93% *ee*,  $[\alpha]_D^{25} = -72.1$  ( $c = 1.0$ ,  $\text{CHCl}_3$ ), colorless oil.  $^1\text{H}$  NMR (400 MHz,  $\text{Chloroform-}d$ )  $\delta$  7.19 – 7.15 (m, 5H), 6.99 – 6.95 (m, 1H), 6.90 – 6.83 (m, 2H), 5.16 (s, 2H), 3.87 – 3.75 (m, 7H), 3.67 – 3.65 (m, 1H), 3.43 (d,  $J = 13.2$  Hz, 1H), 3.16 (dd,  $J = 8.0, 4.4$  Hz,

1H), 2.80 (t,  $J = 9.6$  Hz, 1H), 2.36 (d,  $J = 11.2$  Hz, 1H), 2.25 (s, 1H), 2.05 – 1.96 (m, 1H), 1.79 – 1.66 (m, 1H), 1.62 – 1.48 (m, 2H).  $^{13}\text{C}$  NMR (100 MHz,  $\text{Chloroform-}d$ )  $\delta$  173.1, 152.8, 147.7, 138.1, 129.7, 129.1, 128.4, 127.3, 124.2, 121.8, 113.0, 66.0, 63.1, 61.7, 61.1, 59.7, 55.9, 55.8, 30.2, 25.5. HRMS (ESI)  $m/z$  calcd for  $\text{C}_{22}\text{H}_{27}\text{NNaO}_5$   $[\text{M} + \text{H}]^+$ : 408.1781, found: 408.1779. HPLC: Chiralcel AD-H column, 254 nm, 30 °C, *n*-hexane/*i*-propanol = 90/10, flow = 0.7 mL/min, retention time 22.4 min (maj) and 24.4 min.

**methyl (2S,5S)-1-benzyl-5-hydroxypiperidine-2-carboxylate (2m):** 23.2 mg, 93% yield, 11.8:1 *dr*, 97%

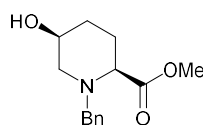

*ee*,  $[\alpha]_D^{25} = -59.2$  ( $c = 1.0$ ,  $\text{CHCl}_3$ ), colorless oil.  $^1\text{H}$  NMR (400 MHz,  $\text{Chloroform-}d$ )  $\delta$  7.33 – 7.20 (m, 5H), 3.80 (d,  $J = 13.2$  Hz, 1H), 3.76 – 3.73 (m, 1H), 3.71 (s, 3H), 3.51 (d,  $J = 13.2$  Hz, 1H), 3.23 (dd,  $J = 7.2, 4.4$  Hz, 1H), 2.85 (dd,  $J = 11.2, 6.4$  Hz, 1H), 2.66 (s, 1H), 2.45 (dd,  $J = 11.2, 3.2$  Hz, 1H), 2.12 – 1.99 (m, 1H), 1.84

– 1.72 (m, 1H), 1.72 – 1.54 (m, 2H).  $^{13}\text{C}$  NMR (100 MHz,  $\text{Chloroform-}d$ )  $\delta$  173.8, 138.0, 129.0, 128.3, 127.3, 65.9, 62.8, 59.7, 55.6, 51.6, 30.0, 25.5. HRMS (ESI)  $m/z$  calcd for  $\text{C}_{14}\text{H}_{19}\text{NNaO}_3$   $[\text{M} + \text{Na}]^+$ : 272.1257, found: 272.1259. HPLC: Chiralcel AD-H column, 254 nm, 30 °C, *n*-hexane/*i*-propanol = 90/10, flow = 0.7 mL/min, retention time 11.9 min (maj) and 14.2 min.

**ethyl (2S,5S)-1-benzyl-5-hydroxypiperidine-2-carboxylate (2n):** 24.8 mg, 94% yield, 11.4:1 *dr*, 94%

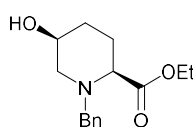

*ee*,  $[\alpha]_D^{25} = -80.3$  ( $c = 1.0$ ,  $\text{CHCl}_3$ ), colorless oil.  $^1\text{H}$  NMR (400 MHz,  $\text{Chloroform-}d$ )  $\delta$  7.33 – 7.20 (m, 5H), 4.19 (q,  $J = 7.2$  Hz, 2H), 3.82 (d,  $J = 13.6$  Hz, 1H), 3.78 – 3.69 (m, 1H), 3.50 (d,  $J = 13.6$  Hz, 1H), 3.19 (dd,  $J = 7.6, 4.4$  Hz, 1H), 2.86 (dd,  $J = 11.2, 6.4$  Hz, 1H), 2.66 (s, 1H), 2.43 (dd,  $J = 11.2, 2.8$  Hz, 1H), 2.10 – 2.02 (m,

1H), 1.82 – 1.75 (m, 1H), 1.68 – 1.58 (m, 2H), 1.29 (t,  $J = 7.2$  Hz, 3H).  $^{13}\text{C}$  NMR (100 MHz,  $\text{Chloroform-}d$ )  $\delta$  173.3, 138.0, 129.0, 128.3, 127.3, 65.9, 63.1, 60.5, 59.7, 55.7, 30.1, 25.6, 14.4. HRMS (ESI)  $m/z$  calcd for  $\text{C}_{15}\text{H}_{21}\text{NNaO}_3$   $[\text{M} + \text{Na}]^+$ : 286.1414, found: 286.1415. HPLC: Chiralcel AD-H column, 254 nm, 30 °C, *n*-hexane/*i*-propanol = 90/10, flow = 0.7 mL/min, retention time 11.3 min (maj) and 16.4 min.

**isopropyl (2S,5S)-1-benzyl-5-hydroxypiperidine-2-carboxylate (2o):** 23.6 mg, 85% yield, 13.8:1 *dr*,

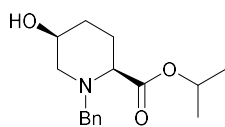

92% *ee*,  $[\alpha]_D^{25} = -69.1$  ( $c = 1.0$ ,  $\text{CHCl}_3$ ) colorless oil.  $^1\text{H}$  NMR (400 MHz,  $\text{Chloroform-}d$ )  $\delta$  7.34 – 7.19 (m, 5H), 5.13 – 5.04 (m, 1H), 3.83 (d,  $J = 13.6$  Hz, 1H), 3.76 – 3.72 (m, 1H), 3.49 (d,  $J = 13.2$  Hz, 1H), 3.15 (dd,  $J = 7.6, 4.4$  Hz, 1H), 2.86 (dd,  $J = 11.2, 6.4$  Hz, 1H), 2.64 (s, 1H), 2.41 (dd,  $J = 11.2, 2.8$  Hz, 1H),

2.09 – 2.00 (m, 1H), 1.83 – 1.71 (m, 1H), 1.68 – 1.60 (m, 2H), 1.28 (d,  $J = 6.4$  Hz, 3H), 1.26 (d,  $J = 6.4$  Hz, 3H).  $^{13}\text{C}$  NMR (100 MHz,  $\text{Chloroform-}d$ )  $\delta$  172.8, 138.1, 129.0, 128.3, 127.3, 68.0, 65.9, 63.2, 59.6, 55.7, 30.1, 25.4, 22.0, 21.9. HRMS (ESI)  $m/z$  calcd for  $\text{C}_{16}\text{H}_{23}\text{NNaO}_3$   $[\text{M} + \text{Na}]^+$ : 300.1570, found: 300.1568. HPLC: Chiralcel AD-H column, 254 nm, 30 °C, *n*-hexane/ethanol = 95/5, flow = 0.7 mL/min, retention time 15.5 min (maj) and 23.4 min.

**tert-butyl (2S,5S)-1-benzyl-5-hydroxypiperidine-2-carboxylate (2p):** 26.5 mg, 91% yield, 19.3:1 *dr*,

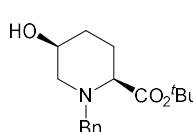

94% *ee*,  $[\alpha]_D^{25} = -59.6$  ( $c = 1.0$ ,  $\text{CHCl}_3$ ), colorless oil.  $^1\text{H}$  NMR (400 MHz,  $\text{Chloroform-}d$ )  $\delta$  7.35 – 7.20 (m, 5H), 3.86 (d,  $J = 13.2$  Hz, 1H), 3.73 (m, 1H), 3.48 (d,  $J = 13.6$  Hz, 1H), 3.06 (dd,  $J = 7.6, 4.4$  Hz, 1H), 2.85 (dd,  $J = 11.6, 6.4$  Hz, 1H), 2.68 (s, 1H), 2.38 (dd,  $J = 11.6, 3.2$  Hz, 1H), 2.08 – 2.00 (m, 1H), 1.82 – 1.69 (m,

1H), 1.63 (m, 2H), 1.49 (s, 9H).  $^{13}\text{C}$  NMR (100 MHz,  $\text{Chloroform-}d$ )  $\delta$  172.7, 138.3, 129.0, 128.4, 127.3,

81.1, 65.9, 63.9, 59.6, 55.7, 30.1, 28.2, 25.5. HRMS (ESI)  $m/z$  calcd for  $C_{17}H_{23}NNaO_3$   $[M + Na]^+$ : 314.1727, found: 314.1731. HPLC: Chiralcel IA-H column, 254 nm, 30 °C, *n*-hexane/*i*-propanol = 95/5, flow = 0.5 mL/min, retention time 14.3 min (maj) and 16.6 min.

**cyclopropylmethyl (2*S*,5*S*)-1-benzyl-5-hydroxypiperidine-2-carboxylate (2q)**: 25.8 mg, 89% yield,

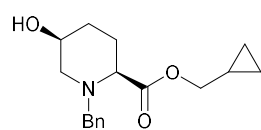

17.8:1 *dr*, 96% *ee*,  $[\alpha]_D^{25} = -58.6$  ( $c = 1.0$ ,  $CHCl_3$ ), colorless oil.  $^1H$  NMR (400 MHz, Chloroform-*d*)  $\delta$  7.36 – 7.20 (m, 5H), 4.04 – 3.92 (m, 2H), 3.84 (d,  $J = 13.6$  Hz, 1H), 3.78 – 3.73 (m, 1H), 3.52 (d,  $J = 13.2$  Hz, 1H), 3.22 (dd,  $J = 7.6$ , 4.0 Hz, 1H), 2.87 (dd,  $J = 11.2$ , 6.4 Hz, 1H), 2.65 (s, 1H), 2.44 (dd,  $J =$

11.6, 3.2 Hz, 1H), 2.15 – 2.01 (m, 1H), 1.85 – 1.74 (m, 1H), 1.70 – 1.58 (m, 2H), 1.22 – 1.10 (m, 1H), 0.62 – 0.52 (m, 2H), 0.35 – 0.26 (m, 2H).  $^{13}C$  NMR (100 MHz, Chloroform-*d*)  $\delta$  173.4, 138.0, 129.1, 128.3, 127.3, 69.3, 65.9, 63.1, 59.7, 55.7, 30.1, 25.5, 10.0, 3.43, 3.41. HRMS (ESI)  $m/z$  calcd for  $C_{17}H_{23}NNaO_3$   $[M + Na]^+$ : 312.1570, found: 312.1572. HPLC: Chiralcel AD-H column, 254 nm, 30 °C, *n*-hexane/*i*-propanol = 95/5, flow = 0.7 mL/min, retention time 19.1 min (maj) and 36.1 min.

**cyclopentylmethyl (2*S*,5*S*)-1-benzyl-5-hydroxypiperidine-2-carboxylate (2r)**: 29.2 mg, 92% yield,

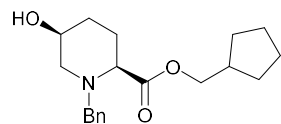

13.8:1 *dr*, 96% *ee*,  $[\alpha]_D^{25} = -48.2$  ( $c = 1.0$ ,  $CHCl_3$ ), colorless oil.  $^1H$  NMR (400 MHz, Chloroform-*d*)  $\delta$  7.33 – 7.20 (m, 5H), 4.04 (d,  $J = 6.4$  Hz, 2H), 3.83 (d,  $J = 13.6$  Hz, 1H), 3.77 – 3.72 (m, 1H), 3.54 (d,  $J = 13.2$  Hz, 1H), 3.22 (dd,  $J = 8.0$ , 3.6 Hz, 1H), 2.86 (dd,  $J = 11.6$ , 6.8 Hz, 1H), 2.48 – 2.44

(m, 2H), 2.25 (m, 1H), 2.13 – 2.01 (m, 1H), 1.83 – 1.80 (m, 3H), 1.68 – 1.52 (m, 6H), 1.31 – 1.22 (m, 2H).  $^{13}C$  NMR (100 MHz, Chloroform-*d*)  $\delta$  173.4, 138.2, 129.0, 128.4, 127.3, 68.6, 66.1, 62.9, 59.7, 55.7, 38.7, 30.2, 29.6, 25.7, 25.5. HRMS (ESI)  $m/z$  calcd for  $C_{19}H_{27}NNaO_3$   $[M + Na]^+$ : 340.1883, found: 340.1887. HPLC: Chiralcel AS-H column, 254 nm, 30 °C, *n*-hexane/*i*-propanol = 95/5, flow = 0.5 mL/min, retention time 20.0 min (maj) and 23.5 min.

**cyclohexylmethyl (2*S*,5*S*)-1-benzyl-5-hydroxypiperidine-2-carboxylate (2s)**: 30.8 mg, 93% yield,

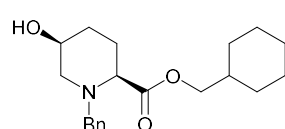

13.7:1 *dr*, 93% *ee*,  $[\alpha]_D^{25} = -55.1$  ( $c = 1.0$ ,  $CHCl_3$ ), colorless oil.  $^1H$  NMR (400 MHz, Chloroform-*d*)  $\delta$  7.33 – 7.18 (m, 5H), 3.95 (d,  $J = 6.4$  Hz, 2H), 3.83 (d,  $J = 13.2$  Hz, 1H), 3.77 – 3.72 (m, 1H), 3.53 (d,  $J = 13.6$  Hz, 1H), 3.22 (dd,  $J = 7.6$ , 4.4 Hz, 1H), 2.86 (dd,  $J = 11.6$ , 6.8 Hz, 1H), 2.54 – 2.36

(m, 2H), 2.16 – 2.00 (m, 1H), 1.87 – 1.53 (m, 9H), 1.33 – 1.12 (m, 3H), 1.04 – 0.95 (m, 2H).  $^{13}C$  NMR (100 MHz, Chloroform-*d*)  $\delta$  173.4, 138.2, 129.0, 128.4, 127.3, 69.8, 66.0, 63.0, 59.7, 55.8, 37.3, 30.2, 29.9, 26.4, 25.8, 25.7. HRMS (ESI)  $m/z$  calcd for  $C_{20}H_{29}NNaO_3$   $[M + Na]^+$ : 354.2040, found: 354.2035. HPLC: Chiralcel AS-H column, 254 nm, 30 °C, *n*-hexane/*i*-propanol = 95/5, flow = 0.5 mL/min, retention time 18.1 min (maj) and 21.2 min.

**benzyl (2*S*,5*S*)-1-(4-cyanobenzyl)-5-hydroxypiperidine-2-carboxylate (2t)**: 31.2 mg, 89% yield,

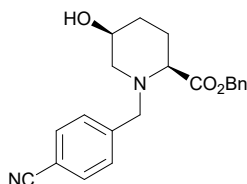

13.0:1 *dr*, 90% *ee*,  $[\alpha]_D^{25} = -55.9$  ( $c = 1.0$ ,  $CHCl_3$ ), colorless oil.  $^1H$  NMR (400 MHz, Chloroform-*d*)  $\delta$  7.48 (d,  $J = 7.6$  Hz, 2H), 7.31 – 7.27 (m, 7H), 5.13 – 5.05 (m, 2H), 3.78 (d,  $J = 14.0$  Hz, 1H), 3.67 – 3.65 (m, 1H), 3.49 (d,  $J = 14.0$  Hz, 1H), 3.22 (t,  $J = 5.6$  Hz, 1H), 2.79 – 2.70 (m, 1H), 2.42 – 2.38 (m, 1H), 2.22 (s, 1H), 2.05 – 1.98 (m, 1H), 1.81 – 1.70 (m, 1H), 1.67 – 1.62 (m, 1H), 1.52 –

1.42 (m, 1H).  $^{13}C$  NMR (100 MHz, Chloroform-*d*)  $\delta$  172.7, 144.2, 135.7, 132.2, 129.3, 128.7, 128.6, 128.4, 119.0, 111.1, 66.5, 66.1, 62.5, 59.3, 55.7, 30.0, 25.6. HRMS (ESI)  $m/z$  calcd for  $C_{21}H_{22}N_2NaO_3$   $[M + Na]^+$ : 373.1523, found: 373.1521. HPLC: Chiralcel AD-H column, 254 nm, 30 °C, *n*-hexane/*i*-propanol = 90/10, flow = 0.7 mL/min, retention time 45.9 min (maj) and 52.4 min.

**benzyl (2*S*,5*S*)-5-hydroxy-1-(4-(methoxycarbonyl)benzyl)piperidine-2-carboxylate (2u):** 36.4 mg,

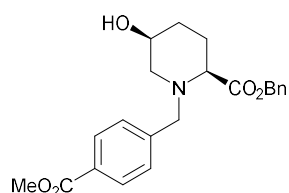

95% yield, 13.7:1 *dr*, 95% *ee*,  $[\alpha]_D^{25} = -80.7$  ( $c = 1.0$ ,  $\text{CHCl}_3$ ), colorless oil.  $^1\text{H}$  NMR (400 MHz,  $\text{Chloroform-}d$ )  $\delta$  7.94 (d,  $J = 7.6$  Hz, 2H), 7.35 – 7.26 (m, 7H), 5.24 – 5.10 (m, 2H), 3.89 (s, 3H), 3.85 (d,  $J = 14.0$  Hz, 1H), 3.75 – 3.73 (m, 1H), 3.56 (d,  $J = 14.0$  Hz, 1H), 3.33 – 3.23 (m, 1H), 2.89 – 2.79 (m, 1H), 2.47 (d,  $J = 11.2$  Hz, 1H), 2.39 – 2.31 (m, 1H), 2.11 – 2.05 (m, 1H), 1.85 – 1.77 (m, 1H), 1.73 – 1.66 (m, 1H), 1.61 – 1.53 (m, 1H).  $^{13}\text{C}$  NMR (100 MHz,  $\text{Chloroform-}d$ )  $\delta$  172.9, 167.1, 143.7, 135.8, 129.7, 129.2, 128.8, 128.7, 128.5, 128.4, 66.4, 66.1, 62.7, 59.4, 55.8, 52.1, 30.0, 25.6. HRMS (ESI)  $m/z$  calcd for  $\text{C}_{22}\text{H}_{25}\text{NNaO}_5$   $[\text{M} + \text{Na}]^+$ : 406.1625, found: 406.1620. HPLC: Chiralcel IA-H column, 254 nm, 30 °C, *n*-hexane/*i*-propanol = 90/10, flow = 0.7 mL/min, retention time 26.3 min (maj) and 31.6 min.

**benzyl (2*S*,5*S*)-5-hydroxy-1-(4-nitrobenzyl)piperidine-2-carboxylate (2v):** 32.6 mg, 88% yield,

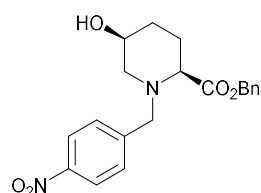

12.5:1 *dr*, 91% *ee*,  $[\alpha]_D^{25} = -59.2$  ( $c = 1.0$ ,  $\text{CHCl}_3$ ), colorless oil.  $^1\text{H}$  NMR (400 MHz,  $\text{Chloroform-}d$ )  $\delta$  8.12 (d,  $J = 8.4$  Hz, 2H), 7.44 (d,  $J = 8.4$  Hz, 2H), 7.34 – 7.33 (m, 5H), 5.22 – 5.13 (m, 2H), 3.91 (d,  $J = 14.4$  Hz, 1H), 3.81 – 3.73 (m, 1H), 3.63 (d,  $J = 14.4$  Hz, 1H), 3.32 t,  $J = 5.6$  Hz, 1H), 2.84 (dd,  $J = 11.2$ , 6.4 Hz, 1H), 2.52 (dd,  $J = 10.8$ , 3.2 Hz, 1H), 2.25 (s, 1H), 2.18 – 2.07 (m, 1H), 1.92 – 1.79 (m, 1H), 1.79 – 1.69 (m, 1H), 1.61 – 1.52 (m, 1H).  $^{13}\text{C}$  NMR (100 MHz,  $\text{Chloroform-}d$ )  $\delta$  172.6, 147.4, 146.2, 135.7, 129.4, 128.8, 128.6, 128.5, 123.7, 66.6, 66.2, 62.5, 59.0, 55.8, 30.0, 25.7. HRMS (ESI)  $m/z$  calcd for  $\text{C}_{20}\text{H}_{22}\text{N}_2\text{NaO}_5$   $[\text{M} + \text{Na}]^+$ : 393.1421, found: 393.1425. HPLC: Chiralcel AD-H column, 254 nm, 30 °C, *n*-hexane/*i*-propanol = 90/10, flow = 0.7 mL/min, retention time 53.0 min (maj) and 56.7 min.

**benzyl (2*S*,5*S*)-5-hydroxy-1-(4-(trifluoromethyl)benzyl)piperidine-2-carboxylate (2w):** 35.8 mg, 91%

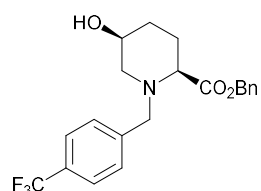

yield, 14.5:1 *dr*, 88% *ee*,  $[\alpha]_D^{25} = -69.7$  ( $c = 1.0$ ,  $\text{CHCl}_3$ ), colorless oil.  $^1\text{H}$  NMR (400 MHz,  $\text{Chloroform-}d$ )  $\delta$  7.53 (d,  $J = 8.0$  Hz, 2H), 7.52 – 7.36 (m, 7H), 5.19 – 5.17 (m, 2H), 3.86 (d,  $J = 14.0$  Hz, 1H), 3.76 – 3.74 (m, 1H), 3.56 (dd,  $J = 13.6$ , 2.4 Hz, 1H), 3.31 – 3.27 (m, 1H), 2.91 – 2.80 (m, 1H), 2.53 – 2.43 (m, 1H), 2.29 (s, 1H), 2.18 – 2.04 (m, 1H), 1.86 – 1.79 (m, 1H), 1.75 – 1.66 (m, 1H), 1.63 – 1.54 (m, 1H).  $^{13}\text{C}$  NMR (100 MHz,  $\text{Chloroform-}d$ )  $\delta$  172.9, 142.5, 135.8, 129.6 (q,  $J = 32.1$  Hz), 129.1, 128.8, 128.6, 128.5, 125.3 (q,  $J = 3.8$  Hz), 124.3 (q,  $J = 270.3$  Hz), 66.5, 66.1, 62.8, 59.2, 55.8, 30.1, 25.6. HRMS (ESI)  $m/z$  calcd for  $\text{C}_{21}\text{H}_{22}\text{F}_3\text{NNaO}_3$   $[\text{M} + \text{Na}]^+$ : 416.1444, found: 416.1438. HPLC: Chiralcel AD-H column, 254 nm, 30 °C, *n*-hexane/*i*-propanol = 90/10, flow = 0.7 mL/min, retention time 10.8 min (maj) and 12.1 min.

**benzyl (2*S*,5*S*)-5-hydroxy-1-(4-methylbenzyl)piperidine-2-carboxylate (2x):** 30.9 mg, 91% yield,

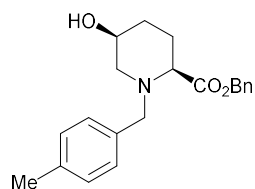

16.5:1 *dr*, 97% *ee*,  $[\alpha]_D^{25} = -51.7$  ( $c = 1.0$ ,  $\text{CHCl}_3$ ), colorless oil.  $^1\text{H}$  NMR (400 MHz,  $\text{Chloroform-}d$ )  $\delta$  7.34 – 7.30 (m, 5H), 7.17 – 7.02 (m, 4H), 5.17 (s, 2H), 3.78 – 3.72 (m, 2H), 3.47 (dd,  $J = 12.8$ , 2.0 Hz, 1H), 3.25 – 3.21 (m, 1H), 2.91 – 2.82 (m, 1H), 2.54 – 2.39 (m, 2H), 2.31 (s, 3H), 2.09 – 2.02 (m, 1H), 1.82 – 1.74 (m, 1H), 1.67 – 1.53 (m, 2H).  $^{13}\text{C}$  NMR (100 MHz,  $\text{Chloroform-}d$ )  $\delta$  173.1, 136.9, 135.9, 134.7, 129.1, 129.0, 128.7, 128.4 (2C), 66.3, 65.9, 62.8, 59.4, 55.7, 30.1, 25.5, 21.2. HRMS (ESI)  $m/z$  calcd for  $\text{C}_{21}\text{H}_{25}\text{NNaO}_3$   $[\text{M} + \text{Na}]^+$ : 362.1727, found: 362.1733. HPLC: Chiralcel AD-H column, 254 nm, 30 °C, *n*-hexane/*i*-propanol = 90/10, flow = 0.7 mL/min, retention time 15.0 min (maj) and 20.9 min.

**benzyl (2*S*,5*S*)-1-(4-bromobenzyl)-5-hydroxypiperidine-2-carboxylate (2y):** 36.0 mg, 89% yield,

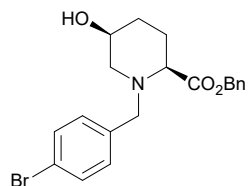

15.7:1 *dr*, 91% *ee*,  $[\alpha]_D^{25} = -71.9$  ( $c = 1.0$ ,  $\text{CHCl}_3$ ), colorless oil.  $^1\text{H}$  NMR (400 MHz,  $\text{Chloroform-}d$ )  $\delta$  7.48 – 7.23 (m, 7H), 7.12 (d,  $J = 8.0$  Hz, 2H), 5.16 (s, 2H), 3.76 – 3.73 (m, 2H), 3.45 (d,  $J = 13.6$  Hz, 1H), 3.24 (t,  $J = 6.0$  Hz, 1H), 2.84 (dd,  $J = 11.2, 6.4$  Hz, 1H), 2.44 (d,  $J = 11.6$  Hz, 1H), 2.36 (s, 1H), 2.14 – 1.99 (m, 1H), 1.83 – 1.76 (m, 1H), 1.74 – 1.52 (m, 2H).  $^{13}\text{C}$  NMR (100 MHz,  $\text{Chloroform-}d$ )  $\delta$  172.9, 137.1, 135.8, 131.5, 130.7, 128.7, 128.54, 128.47, 121.2, 66.5, 66.0, 62.7, 59.0, 55.7, 30.0, 25.5. HRMS (ESI)  $m/z$  calcd for  $\text{C}_{20}\text{H}_{23}\text{BrNO}_3$   $[\text{M} + \text{H}]^+$ : 404.0856, found: 404.0853. HPLC: Chiralcel AD-H column, 254 nm, 30 °C, *n*-hexane/*i*-propanol = 90/10, flow = 0.7 mL/min, retention time 20.9 min (maj) and 24.5 min.

**benzyl (2*S*,5*S*)-1-(4-chlorobenzyl)-5-hydroxypiperidine-2-carboxylate (2z):** 33.5 mg, 93% yield,

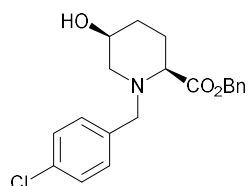

15.4:1 *dr*, 93% *ee*,  $[\alpha]_D^{25} = -70.1$  ( $c = 1.0$ ,  $\text{CHCl}_3$ ), colorless oil.  $^1\text{H}$  NMR (400 MHz,  $\text{Chloroform-}d$ )  $\delta$  7.36 – 7.24 (m, 5H), 7.26 – 7.14 (m, 4H), 5.16 (s, 2H), 3.80 – 3.68 (m, 2H), 3.48 (dd,  $J = 13.6, 2.4$  Hz, 1H), 3.25 (t,  $J = 6.0$  Hz, 1H), 2.84 (dd,  $J = 11.6, 6.4$  Hz, 1H), 2.51 – 2.36 (m, 2H), 2.11 – 2.01 (m, 1H), 1.83 – 1.76 (m, 1H), 1.70 – 1.66 (m, 1H), 1.59 – 1.54 (m, 1H).  $^{13}\text{C}$  NMR (100 MHz,  $\text{Chloroform-}d$ )  $\delta$  172.9, 136.6, 135.8, 133.0, 130.3, 128.7, 128.52 (2C), 128.45, 66.4, 66.0, 62.6, 59.0, 55.7, 30.1, 25.6. HRMS (ESI)  $m/z$  calcd for  $\text{C}_{20}\text{H}_{22}\text{ClNNaO}_3$   $[\text{M} + \text{Na}]^+$ : 382.1180, found: 382.1189. HPLC: Chiralcel AD-H column, 254 nm, 30 °C, *n*-hexane/*i*-propanol = 90/10, flow = 0.7 mL/min, retention time 19.1 min (maj) and 22.7 min.

**benzyl (2*S*,5*S*)-1-(2-bromobenzyl)-5-hydroxypiperidine-2-carboxylate (2aa):** 34.4 mg, 85% yield,

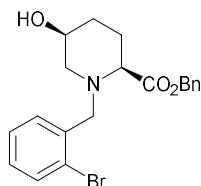

11.9:1 *dr*, 90% *ee*,  $[\alpha]_D^{20} = -57.7$  ( $c = 1.0$ ,  $\text{CHCl}_3$ ), colorless oil.  $^1\text{H}$  NMR (400 MHz,  $\text{Chloroform-}d$ )  $\delta$  7.43 (d,  $J = 8.0$  Hz, 1H), 7.35 (d,  $J = 8.0$  Hz, 1H), 7.28 – 7.26 (m, 5H), 7.21 – 7.14 (m, 1H), 7.04 – 7.00 (m, 1H), 5.15 – 5.05 (m, 2H), 3.76 (d,  $J = 14.4$  Hz, 1H), 3.71 – 3.59 (m, 2H), 3.35 – 3.31 (m, 1H), 2.80 (t,  $J = 10.0$  Hz, 1H), 2.53 – 2.49 (m, 1H), 2.12 – 1.93 (m, 2H), 1.79 – 1.64 (m, 2H), 1.49 – 1.42 (m, 1H).

$^{13}\text{C}$  NMR (100 MHz,  $\text{Chloroform-}d$ )  $\delta$  173.0, 137.8, 135.9, 132.9, 130.8, 128.7, 128.7, 128.5, 128.4, 127.4, 124.7, 66.50, 66.46, 62.6, 59.1, 55.4, 30.2, 25.8. HRMS (ESI)  $m/z$  calcd for  $\text{C}_{20}\text{H}_{23}\text{BrNO}_3$   $[\text{M} + \text{H}]^+$ : 404.0856, found: 404.0854. HPLC: Chiralcel AD-H column, 254 nm, 30 °C, *n*-hexane/*i*-propanol = 90/10, flow = 0.7 mL/min, retention time 18.9 min (maj) and 24.1 min.

**benzyl (2*S*,5*S*)-1-(3,5-dimethylbenzyl)-5-hydroxypiperidine-2-carboxylate (2ab):** 32.2 mg, 91%

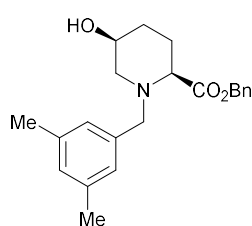

yield, 13.6:1 *dr*, 94% *ee*,  $[\alpha]_D^{25} = -65.1$  ( $c = 1.0$ ,  $\text{CHCl}_3$ ), colorless oil.  $^1\text{H}$  NMR (400 MHz,  $\text{Chloroform-}d$ )  $\delta$  7.39 – 7.35 (m, 5H), 6.93 – 6.83 (m, 3H), 5.19 (s, 2H), 3.77 – 3.73 (m, 2H), 3.42 (d,  $J = 13.2$  Hz, 1H), 2.91 – 2.88 (m, 1H), 2.94 – 2.84 (m, 1H), 2.43 – 2.27 (m, 2H), 2.27 (s, 6H), 2.11 – 2.06 (m, 1H), 1.88 – 1.75 (m, 1H), 1.64 (q,  $J = 6.3, 5.6$  Hz, 2H).  $^{13}\text{C}$  NMR (100 MHz,  $\text{Chloroform-}d$ )  $\delta$  173.2, 137.8, 137.7, 135.9, 129.0, 128.7, 128.5 (2C), 127.0, 66.4, 65.9,

63.2, 59.7, 55.9, 30.2, 25.5, 21.4. HRMS (ESI)  $m/z$  calcd for  $\text{C}_{22}\text{H}_{27}\text{NNaO}_3$   $[\text{M} + \text{Na}]^+$ : 376.1883, found: 376.1878. HPLC: Chiralcel IA-H column, 254 nm, 30 °C, *n*-hexane/*i*-propanol = 95/5, flow = 0.5 mL/min, retention time 21.3 min (maj) and 29.7 min.

**benzyl (2*S*,5*S*)-1-(3,5-dimethoxybenzyl)-5-hydroxypiperidine-2-carboxylate (2ac):** 35.8 mg, 93%

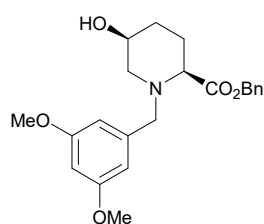

yield, >20:1 *dr*, 95% *ee*,  $[\alpha]_D^{25} = -49.1$  ( $c = 1.0$ ,  $\text{CHCl}_3$ ), colorless oil.  $^1\text{H}$  NMR (400 MHz,  $\text{Chloroform-}d$ )  $\delta$  7.28 – 7.17 (m, 5H), 6.36 (s, 2H), 6.26 (s, 1H), 5.08 (s, 2H), 3.73 – 3.60 (m, 8H), 3.39 (dd,  $J = 13.2, 2.0$  Hz, 1H), 3.25 – 3.15 (m, 1H), 2.84 – 2.74 (m, 1H), 2.40 – 2.38 (m, 2H), 2.06 – 1.96 (m, 1H), 1.78 – 1.67 (m, 1H), 1.65 – 1.44 (m, 2H).  $^{13}\text{C}$  NMR (100 MHz,  $\text{Chloroform-}d$ )  $\delta$  173.1, 160.8, 140.6, 135.9, 128.7, 128.42, 128.36, 106.7, 99.3, 66.4, 66.1, 62.6, 59.8, 55.7, 55.3, 30.1, 25.6. HRMS (ESI)  $m/z$  calcd for  $\text{C}_{22}\text{H}_{27}\text{NNaO}_5$   $[\text{M} + \text{Na}]^+$ : 408.1781, found: 408.1790 HPLC: Chiralcel AD-H column, 254 nm, 30 °C, *n*-hexane/*i*-propanol = 90/10, flow = 0.7 mL/min, retention time 15.9 min (maj) and 27.7 min.

## 2.4 Result of deuterium labeling experiments

Following standard hydrogenation procedure, deuterium labeling experiment was conducted with specific modification.

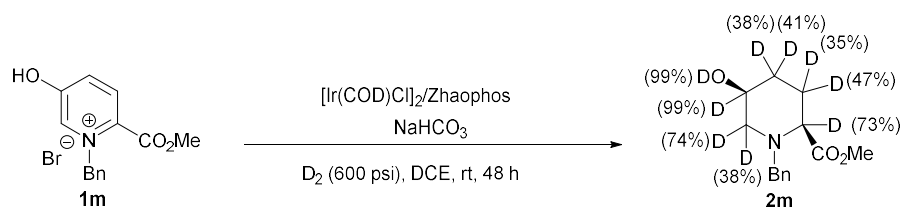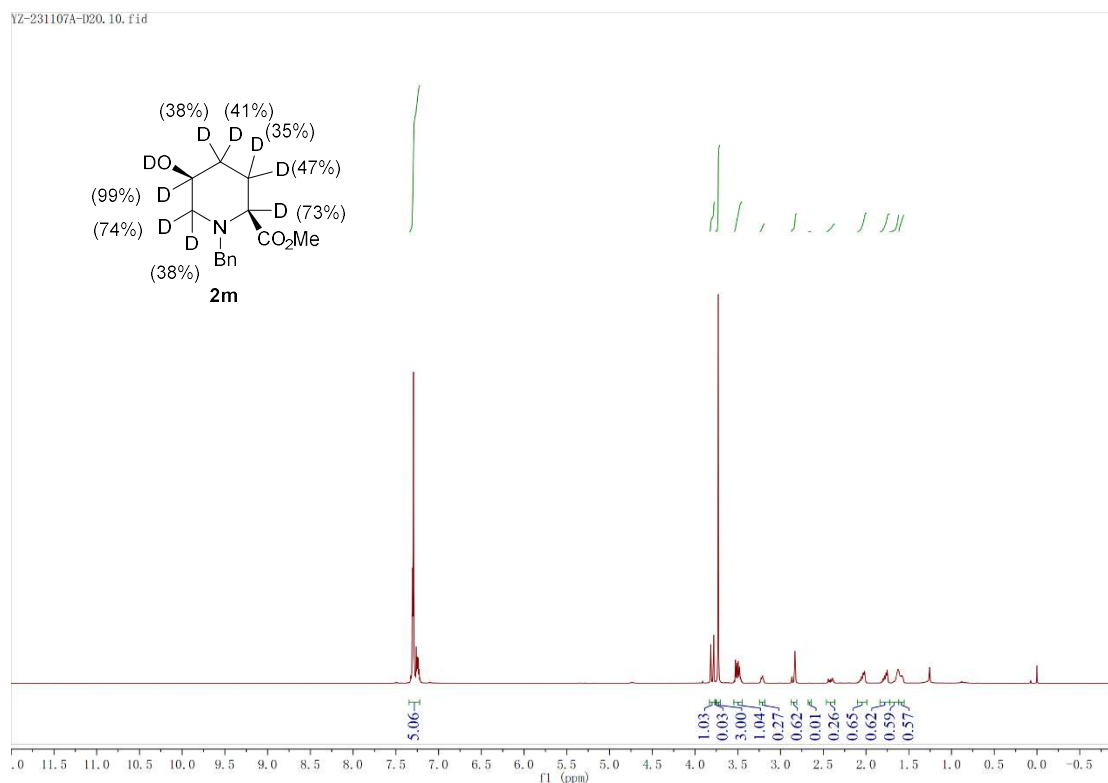

## 2.5 General procedure for asymmetric hydrogenation under continuous flow

All process parts, including fittings, tubes, valves and junctions that hold pressure were purchased from SHENZHEN INSFTECH CO., Ltd. The specification of the reaction coil is 0.5 ml/m. The information of other main components is summarized in Table S1.

**Table S1** Components details of reactor system

| Name  | Information                                                  |
|-------|--------------------------------------------------------------|
| Pump  | Sanotac high pressure HPLC pump AP0030 (0-10 mL/min; 20 MPa) |
| MFC   | SHENZHEN INSFTECH CO., Ltd. FCM-1050 (0-500 sccm, 10 MPa)    |
| BPR   | SHENZHEN INSFTECH CO., Ltd. FAV-1500B (0-500 mL/min, 10 MPa) |
| Mixer | Shanghai X-tec Fluid technology CO., Ltd. SS-CUT-K1FF        |

A mixture of  $[\text{Ir}(\text{COD})\text{Cl}]_2$  (1.0 mol%) and Zhaophos (2.0 mol%) was dissolved in a degassed solvent DCE at argon atmosphere, and the resulting solution was allowed to be stirred at room temperature for 30.0 min. Then, 2-methyl ester-5-hydroxypyridinium salt **1m** (1.0 equiv.) and  $\text{Et}_3\text{N}$  (1.0 equiv.) were added. The process was washed by DCE at a liquid flow rate of 5 mL/min and gas flow rate of 10.0 sccm (avoid back flow of liquid to gas flow meter) for 10.0 minutes and then pressurized the BPR. After the reactor was pressurized to 8.0 MPa, the beforehand reaction medium was pumped instead of solvent. Liquid flow rate was set at 0.5 mL/min and gas flow rate was keeping 40.0 sccm. The liquid holding capacity of the reaction coil can be adjusted according to the needs. When reaction finished, system was depressurized by releasing the gas slowly, and washed the whole system by pumping ethanol for 10.0 minutes. The reaction mixture was filtrated and concentrated in vacuo. The residue was purified by silica gel flash column chromatography ( $\text{CH}_2\text{Cl}_2/\text{MeOH} = 100:1$ ) to give the desired product **2m** (95% yield, 13.1:1 *dr*, 93% *ee*) as a pale-yellow oil.

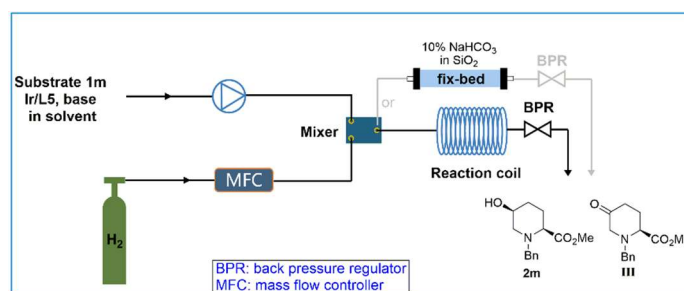

**Figure S1** AH of **1m** under continuous flow.

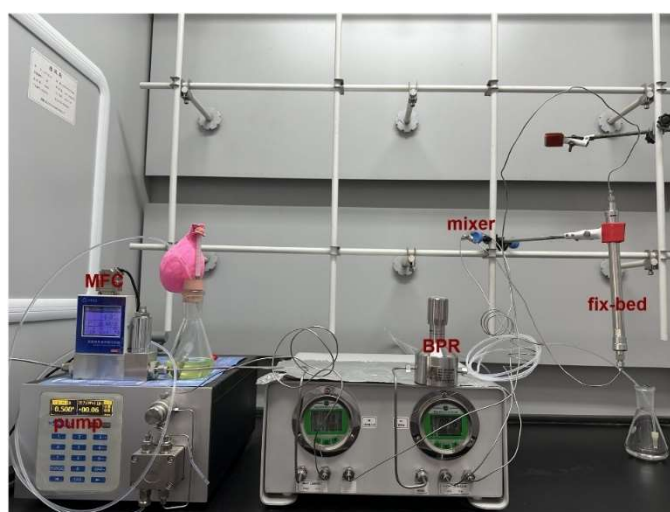

**Figure S2** Set-up for asymmetric hydrogenation under continuous flow in a fix-bed.

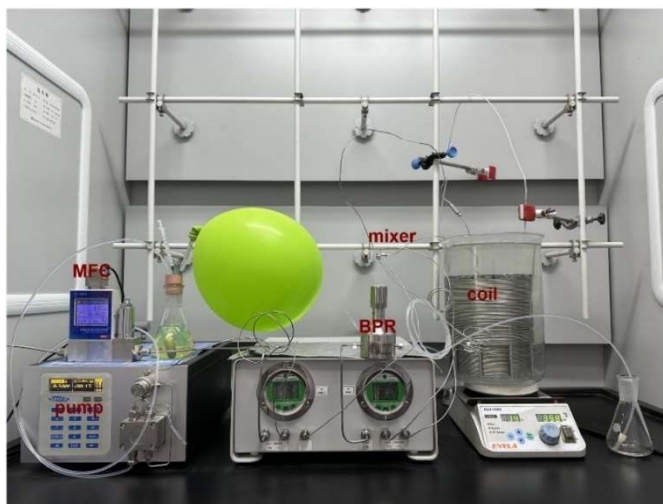

**Figure S3** Set-up for asymmetric hydrogenation under continuous flow in a coil.

## 2.6 General Procedures for Products Transformations

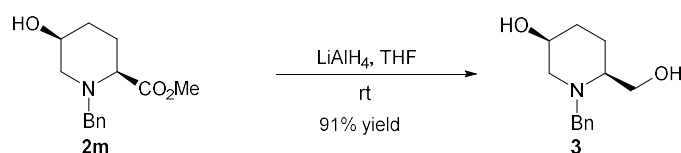

A solution of the methyl ester **2m** (100.0 mg, 0.40 mmol, 1.0 equiv.) in THF (2.5 mL) was added dropwise to a stirred suspension of  $\text{LiAlH}_4$  (22.9 mg, 0.60 mmol, 1.5 equiv.) in THF (2.5 mL) at 0 °C under an argon atmosphere. The resulting mixture was stirred at room temperature for 8 h and then 2 M  $\text{NaOH(aq)}$  (1  $\mu\text{L}$  per 1 mg of  $\text{LiAlH}_4$ ),  $\text{Et}_2\text{O}$  (5 mL) and  $\text{Na}_2\text{SO}_4$  were carefully added. The solids were removed by filtration through Celite and evaporated under reduced pressure to give the crude product. The residue was purified by silica gel flash column chromatography ( $\text{CH}_2\text{Cl}_2/\text{MeOH} = 50:1$ ) to give compound **3** (80.8 mg, 91% yield, 96% *ee*) as a pale-yellow oil.  $[\alpha]_D^{25} = -35.1$  ( $c = 1.0$ ,  $\text{CHCl}_3$ ).  $^1\text{H}$  NMR (400 MHz, Chloroform-*d*)  $\delta$  7.38 – 7.22 (m, 5H), 4.11 (d,  $J = 13.6$  Hz, 1H), 3.89 – 3.85 (m, 2H), 3.64 (dd,  $J = 11.2$ , 4.4 Hz, 1H), 3.44 (d,  $J = 13.2$  Hz, 1H), 2.86 (dd,  $J = 12.4$ , 5.2 Hz, 1H), 2.51 – 2.46 (m, 1H), 2.38 (dd,  $J = 12.4$ , 2.4 Hz, 1H), 2.30 (s, 2H), 1.99 – 1.89 (m, 1H), 1.82 – 1.75 (m, 1H), 1.73 – 1.58 (m, 2H).  $^{13}\text{C}$  NMR (100 MHz, Chloroform-*d*)  $\delta$  138.6, 128.9, 128.6, 127.4, 64.7, 62.8, 61.3, 58.2, 56.7, 30.5, 23.1. HRMS (ESI)  $m/z$  calcd for  $\text{C}_{13}\text{H}_{20}\text{NO}_2$   $[\text{M} + \text{H}]^+$ : 222.1489, found: 222.1492. HPLC: Chiralcel OJ-H column, 254 nm, 30 °C, *n*-hexane/*i*-propanol = 90/10, flow = 0.5 mL/min, retention time 28.5 min and 30.9 min (maj).

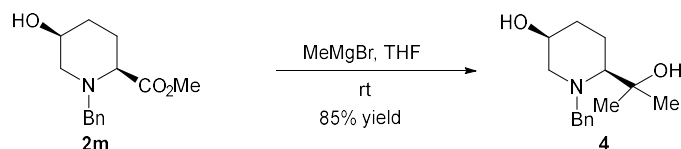

To a solution of the methyl ester **2m** (100.0 mg, 0.4 mmol, 1.0 equiv.) in anhydrous THF (5.0 mL) was added methyl magnesium bromide (1.0 M in THF, 1.2 mL, 1.2 mmol, 3.0 equiv.) dropwise under argon atmosphere at 0 °C. The resulting mixture was stirred at room temperature for 7 h and then quenched with aqueous  $\text{NH}_4\text{Cl}$  solution, extracted with ethyl acetate. Organic phases were combined and dried over



anhydrous Na<sub>2</sub>SO<sub>4</sub>, filtered and the solvent was evaporated under reduced pressure. The residue was purified by silica gel flash column chromatography (CH<sub>2</sub>Cl<sub>2</sub>/MeOH = 50:1) to give compound **4** (84.8 mg, 85% yield, 95% *ee*) as a pale-yellow oil.  $[\alpha]_D^{25} = -23.4$  (*c* = 1.0, CHCl<sub>3</sub>). <sup>1</sup>H NMR (400 MHz, Chloroform-*d*)  $\delta$  7.38 – 7.20 (m, 5H), 4.13 (d, *J* = 13.6 Hz, 1H), 3.95 – 3.90 (m, 1H), 3.69 (d, *J* = 13.2 Hz, 1H), 2.70 – 2.61 (m, 2H), 2.47 (t, *J* = 6.0 Hz, 1H), 1.82 – 1.68 (m, 4H), 1.29 (s, 3H), 1.21 (s, 3H). <sup>13</sup>C NMR (100 MHz, Chloroform-*d*)  $\delta$  139.7, 128.7, 128.6, 127.3, 73.3, 67.5, 63.2, 61.2, 53.6, 30.9, 29.6, 26.0, 20.4. HRMS (ESI) *m/z* calcd for C<sub>15</sub>H<sub>24</sub>NO<sub>2</sub> [*M* + *H*]<sup>+</sup>: 250.1802, found: 250.1804. HPLC: Chiralcel OD-H column, 254 nm, 30 °C, *n*-hexane/*i*-propanol = 90/10, flow = 0.5 mL/min, retention time 16.6 min and 20.0 min (maj).

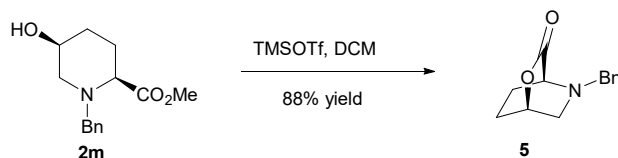

To a stirred solution of the methyl ester **2m** (100.0 mg, 0.4 mmol, 1.0 equiv.) in dry DCM (5.0 mL) was added TMSOTf (144.8  $\mu$ L, 0.8 mmol, 2.0 equiv.). The resulting mixture was stirred overnight at room temperature, then quenched with aqueous NH<sub>4</sub>Cl solution, extracted with ethyl acetate. Organic phases were combined and dried over anhydrous Na<sub>2</sub>SO<sub>4</sub>, filtered and the solvent was evaporated under reduced pressure. The residue was purified by silica gel flash column chromatography (petroleum ether/ethyl acetate = 50:1) to give compound **5** (76.5 mg, 88% yield, 96% *ee*) as a pale-yellow oil.  $[\alpha]_D^{25} = -21.7$  (*c* = 0.3, CHCl<sub>3</sub>). <sup>1</sup>H NMR (400 MHz, Chloroform-*d*)  $\delta$  7.36 – 7.24 (m, 5H), 4.70 – 4.67 (m, 1H), 3.78 (d, *J* = 12.8 Hz, 1H), 3.61 (d, *J* = 13.2 Hz, 1H), 3.32 – 3.30 (m, 1H), 3.16 (dd, *J* = 11.6, 1.2 Hz, 1H), 2.70 – 2.65 (m, 1H), 2.25 – 2.14 (m, 1H), 1.98 – 1.86 (m, 2H), 1.79 – 1.69 (m, 1H). <sup>13</sup>C NMR (100 MHz, Chloroform-*d*)  $\delta$  172.9, 137.8, 129.0, 128.6, 127.6, 74.7, 62.1, 56.0, 54.7, 24.7, 23.5. HRMS (ESI) *m/z* calcd for C<sub>13</sub>H<sub>16</sub>NO<sub>2</sub> [*M* + *H*]<sup>+</sup>: 218.1176, found: 218.1175. HPLC: Chiralcel IC-H column, 254 nm, 30 °C, *n*-hexane/*i*-propanol = 90/10, flow = 0.5 mL/min, retention time 13.7 min and 15.2 min (maj).

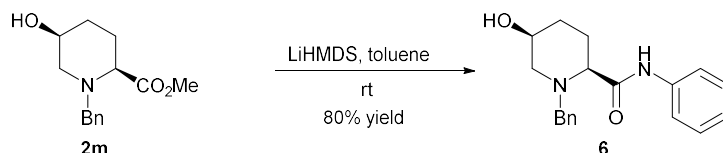

An oven-dried vial equipped with a stir bar was charged with the methyl ester **2m** (100.0 mg, 0.4 mmol, 1.0 equiv.), aniline (45.6  $\mu$ L, 0.5 mmol, 1.2 equiv.) placed under a positive pressure of argon, and subjected to three evacuation/backfilling cycles. Toluene (5.0 mL) and LiHMDS (1.0 M in THF, 0.8 mL, 0.8 mmol, 2.0 equiv.) were sequentially added with vigorous stirring at room temperature, and the reaction mixture was stirred at room temperature overnight. The reaction mixture was quenched with aqueous NH<sub>4</sub>Cl solution, diluted with ethyl acetate (5.0 mL), the organic layer was washed with water, brine, dried over anhydrous Na<sub>2</sub>SO<sub>4</sub>, filtered and concentrated under reduced pressure. The residue was purified by silica gel flash column chromatography (CH<sub>2</sub>Cl<sub>2</sub>/MeOH = 100:1) to give compound **6** (99.3 mg, 80% yield, 95% *ee*) as a white solid, m.p. = 154.6 – 155.9 °C.  $[\alpha]_D^{25} = -55.1$  (*c* = 0.5, CHCl<sub>3</sub>). <sup>1</sup>H NMR (400 MHz, Chloroform-*d*)  $\delta$  8.97 (s, 1H), 7.56 – 7.54 (m, 2H), 7.34 – 7.21 (m, 7H), 7.10 – 7.06 (m, 1H), 3.98 – 3.88 (m, 2H), 3.36 (d, *J* = 13.2 Hz, 1H), 3.03 (dd, *J* = 9.6, 4.0 Hz, 1H), 2.89 (dd, *J* = 12.8, 4.8 Hz, 1H), 2.72 (s, 1H), 2.34 (dd, *J* = 12.8, 2.8 Hz, 1H), 2.21 – 2.11 (m, 1H), 1.94 – 1.88 (m, 1H), 1.81 – 1.70 (m, 1H), 1.67 – 1.60 (m, 1H). <sup>13</sup>C NMR (100 MHz, Chloroform-*d*)  $\delta$  172.0, 137.9, 137.3, 129.1, 128.9, 128.7, 127.7, 124.3, 119.8, 66.8, 64.3, 60.5, 56.4, 30.2, 23.6. HRMS (ESI) *m/z* calcd for

C<sub>19</sub>H<sub>23</sub>N<sub>2</sub>O<sub>2</sub> [M + H]<sup>+</sup>: 311.1754, found: 311.1759. HPLC: Chiralcel OD-H column, 254 nm, 30 °C, *n*-hexane/*i*-propanol = 90/10, flow = 0.5 mL/min, retention time 18.5 min and 19.7 min (maj).

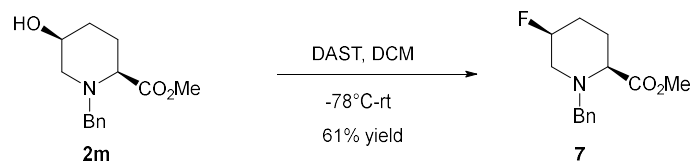

Under nitrogen atmosphere, to a stirred solution of **2m** (100.0 mg, 0.4 mmol, 1.0 equiv.) in dichloromethane (5.0 mL) was added (*N,N*-diethylamino)sulfurtrifluoride (95.1  $\mu$ L, 0.72 mmol, 1.8 equiv.) at  $-78$  °C, and the resulted mixture was slowly warmed to rt. Then, the reaction was quenched with saturated sodium bicarbonate solution and extracted with ethyl acetate. Organic phases were combined and dried over anhydrous Na<sub>2</sub>SO<sub>4</sub>, filtered and the solvent was evaporated under reduced pressure. The residue was purified by silica gel flash column chromatography (petroleum ether/ethyl acetate = 30:1) to give compound **7** (61.3 mg, 61% yield, 97% *ee*) as a pale-yellow oil.  $[\alpha]_D^{25} = -55.9$  (*c* = 0.5, CHCl<sub>3</sub>). <sup>1</sup>H NMR (400 MHz, Chloroform-*d*)  $\delta$  7.37 – 7.25 (m, 5H), 4.67 – 4.50 (m, 1H), 3.84 (d, *J* = 13.6 Hz, 1H), 3.74 – 3.70 (m, 4H), 3.36 – 3.34 (m, 1H), 3.09 – 3.02 (m, 1H), 2.82 – 2.67 (m, 1H), 2.17 – 2.10 (m, 1H), 1.96 – 1.85 (m, 1H), 11.85 – 1.75 (m, 1H), 1.75 – 1.63 (m, 1H). <sup>13</sup>C NMR (100 MHz, Methanol-*d*<sub>4</sub>)  $\delta$  173.3, 138.2, 128.9, 128.5, 127.4, 87.8 (d, *J* = 171.8 Hz), 60.7, 59.7, 52.2 (d, *J* = 24.7 Hz), 51.6, 27.8 (d, *J* = 19.5 Hz), 25.5 (d, *J* = 8.7 Hz). HRMS (ESI) *m/z* calcd for C<sub>14</sub>H<sub>19</sub>FNO<sub>2</sub> [M + H]<sup>+</sup>: 252.1394, found: 252.1398. HPLC: Chiralcel AD-H column, 254 nm, 30 °C, *n*-hexane/*i*-propanol = 90/10, flow = 0.5 mL/min, retention time 14.0 min and 15.4 min (maj).

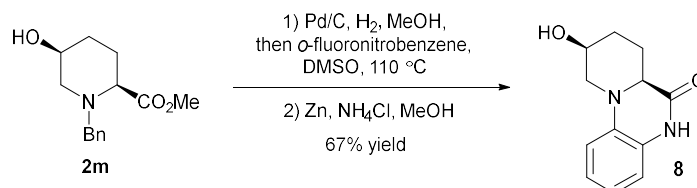

To a stirred solution of the methyl ester **2m** (100.0 mg, 0.4 mmol, 1.0 equiv.) in MeOH (5.0 mL) were added 10% Pd/C (10.0 mg, 10.0 wt%). The resulting mixture was stirred overnight at room temperature under H<sub>2</sub> (1 atm, balloon) and then filtered, washed with MeOH and concentrated under reduced pressure. The crude was dissolved in DMSO, *o*-fluoronitrobenzene (21.1  $\mu$ L, 0.20 mmol, 0.5 equiv.) was added. The mixture was heated to 110 °C overnight. After cooled to room temperature, The mixture was extracted with ethyl acetate, the combined organic phase was washed with brine, dried over anhydrous Na<sub>2</sub>SO<sub>4</sub>, filtered and concentrated under reduced pressure. The resulting residue was next dissolved in methanol (5.0 mL), zinc powder (392.3 mg, 6.0 mmol, 15.0 equiv.) and ammonium chloride (320.9 mg, 6.0 mmol, 15.0 equiv.) was added to this solution, and the mixture was stirred at room temperature overnight. The mixture solution was then filtered, concentrated under reduced pressure. The residue was purified by silica gel flash column chromatography (CH<sub>2</sub>Cl<sub>2</sub>/MeOH = 100:1) to give compound **8** (58.5 mg, 67% yield over 3 steps, 95% *ee*) as a white solid, m.p. = 198.3 – 200.4 °C.  $[\alpha]_D^{25} = -12.3$  (*c* = 0.1, CHCl<sub>3</sub>). <sup>1</sup>H NMR (400 MHz, Methanol-*d*<sub>4</sub>)  $\delta$  6.98 – 6.74 (m, 4H), 4.12 – 4.09 (m, 1H), 3.80 – 3.75 (m, 1H), 3.45 – 3.38 (m, 1H), 2.80 (dd, *J* = 12.4, 2.0 Hz, 1H), 2.15 – 2.07 (m, 2H), 2.01 – 1.94 (m, 1H), 1.78 – 1.68 (m, 1H). <sup>13</sup>C NMR (100 MHz, Methanol-*d*<sub>4</sub>)  $\delta$  170.8, 137.9, 128.3, 124.9, 120.7, 116.2, 113.4, 65.0, 59.6, 53.1, 30.5, 22.4. HRMS (ESI) *m/z* calcd for C<sub>12</sub>H<sub>15</sub>N<sub>2</sub>O<sub>2</sub> [M + H]<sup>+</sup>: 219.1128, found: 219.1129. HPLC: Chiralcel OD-H column, 254 nm, 30 °C, *n*-hexane/*i*-propanol = 90/10, flow = 0.7 mL/min, retention time 14.9 min and 16.6 min (maj).

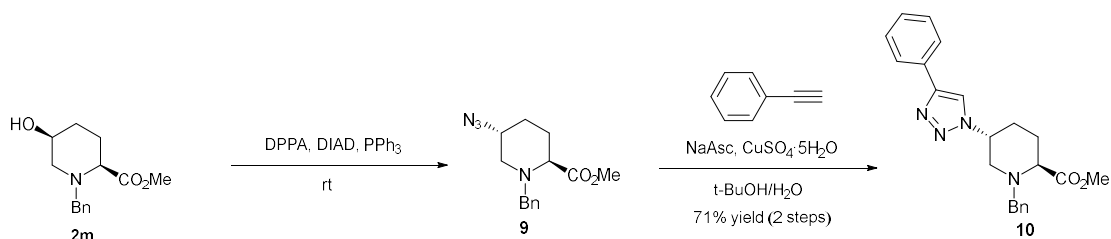

To a solution of compound **2m** (100.0 mg, 0.4 mmol, 1.0 equiv.) and triphenylphosphine (161.8 mg, 0.8 mmol, 2.0 equiv.) in THF (5.0 mL) were added DIAD (158.6  $\mu$ L, 0.8 mmol, 2.0 equiv.) and DPPA (103.4  $\mu$ L, 0.48 mmol, 1.2 equiv.) at 0  $^{\circ}$ C. The reaction mixture was stirred for 7 h at room temperature and extracted with ethyl acetate. Organic phases were combined and dried over anhydrous  $\text{Na}_2\text{SO}_4$ , filtered and the solvent was evaporated under reduced pressure. The residue was purified by silica gel flash column chromatography (petroleum ether/ethyl acetate = 50:1) to give compound **9** as a yellow oil.

To a solution of  $\text{CuSO}_4 \cdot 5\text{H}_2\text{O}$  (1.0 mg, 4.0  $\mu$ mol, 1.0 mol%) and sodium ascorbate (1.6 mg, 8.0  $\mu$ mol, 2.0 mol%) in *t*-BuOH/ $\text{H}_2\text{O}$  (1:1 by v/v, 6.0 mL) was added a mixture of phenylethyne (43.9 mg, 0.4 mmol, 1.0 equiv.) and **9** (109.7 mg, 0.4 mmol, 1.0 equiv.) at room temperature. The resultant mixture was stirred continuously overnight. Then  $\text{CH}_2\text{Cl}_2$  was added to dissolve the crude product. The organic layer was washed with  $\text{H}_2\text{O}$  and brine, and dried over anhydrous  $\text{Na}_2\text{SO}_4$ . Removal of the solvent yielded a residue, which was purified by silica gel flash column chromatography (petroleum ether/ethyl acetate = 40:1) to give compound **10** (106.9 mg, 71% yield, 96% *ee*) as a white solid, m.p. = 178.4 – 180.2  $^{\circ}$ C.  $[\alpha]_D^{25} = 93.73$  ( $c = 1.0$ ,  $\text{CHCl}_3$ ).  $^1\text{H}$  NMR (400 MHz, Chloroform-*d*)  $\delta$  7.94 (s, 1H), 7.80 (d,  $J = 8.0$  Hz, 2H), 7.45 – 7.23 (m, 8H), 4.79 – 4.73 (m, 1H), 3.94 – 3.66 (m, 5H), 3.53 (t,  $J = 4.4$  Hz, 1H), 3.37 (dd,  $J = 11.6, 9.2$  Hz, 1H), 2.98 (dd,  $J = 11.6, 4.4$  Hz, 1H), 2.20 – 1.93 (m, 4H).  $^{13}\text{C}$  NMR (100 MHz, Chloroform-*d*)  $\delta$  173.2, 147.4, 138.0, 130.9, 128.9 (2C), 128.6, 128.1, 127.6, 125.7, 118.6, 60.4, 59.8, 56.8, 52.3, 51.6, 27.9, 26.5. HRMS (ESI)  $m/z$  calcd for  $\text{C}_{22}\text{H}_{25}\text{N}_4\text{O}_2$   $[\text{M} + \text{H}]^+$ : 377.1972, found: 377.1966. HPLC: Chiralcel IA-H column, 254 nm, 30  $^{\circ}$ C, *n*-hexane/*i*-propanol = 90/10, flow = 0.5 mL/min, retention time 18.6 min (maj) and 25.2 min.

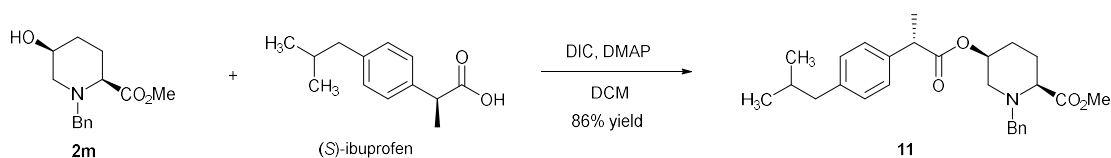

To a solution of **2m** (100.0 mg, 0.4 mmol, 1.0 equiv.) and (S)-ibuprofen (99.0 mg, 0.48 mmol, 1.2 equiv.) in  $\text{CH}_2\text{Cl}_2$  (7.0 mL) were added DMAP (4.9 mg, 0.04 mmol, 10.0% mmol) and DIC (74.3  $\mu$ L, 0.48 mmol, 1.2 equiv.). The resulting suspension was stirred at rt overnight. After adding  $\text{H}_2\text{O}$ , the reaction mixture was extracted with  $\text{CH}_2\text{Cl}_2$ . The combined organic layers were dried over  $\text{Na}_2\text{SO}_4$ , and concentrated under reduced pressure to give the residue, which was purified by flash column chromatography (petroleum ether/ethyl acetate = 50:1) to afford compound **11** (106.9 mg, 86% yield, >20:1 *dr*, 95% *ee*) as a pale-yellow oil.  $[\alpha]_D^{25} = -1.5$  ( $c = 2.0$ ,  $\text{CHCl}_3$ ).  $^1\text{H}$  NMR (400 MHz, Methanol-*d*<sub>4</sub>)  $\delta$  7.25 – 7.04 (m, 9H), 4.80 – 4.70 (m, 1H), 3.75 – 3.57 (m, 6H), 3.33 – 3.29 (m, 1H), 2.84 (dd,  $J = 11.2, 8.4$  Hz, 1H), 2.53 (dd,  $J = 11.6, 4.4$  Hz, 1H), 2.43 (d,  $J = 7.2$  Hz, 2H), 2.03 – 1.97 (m, 1H), 1.88 – 1.72 (m, 3H), 1.55 – 1.46 (m, 1H), 1.40 (d,  $J = 7.2$  Hz, 3H), 0.87 (d,  $J = 6.4$  Hz, 6H).  $^{13}\text{C}$  NMR (100 MHz, Methanol-*d*<sub>4</sub>)  $\delta$  175.6, 174.5, 141.5, 139.5, 139.2, 130.3, 129.7, 129.3, 128.20, 128.17, 70.8, 61.5, 60.4, 52.3, 51.8, 46.4, 46.0, 31.4, 27.6, 26.8, 22.8, 18.9. HRMS (ESI)  $m/z$  calcd for  $\text{C}_{27}\text{H}_{36}\text{NO}_4$   $[\text{M} + \text{H}]^+$ : 438.2639, found: 438.2644. HPLC: Chiralcel OD-H column, 254 nm, 30  $^{\circ}$ C, *n*-hexane/*i*-propanol = 90/10, flow = 0.5 mL/min, retention time 24.4 min (maj) and 31.9 min.

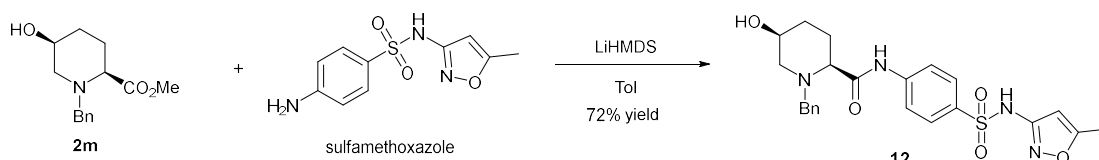

An oven-dried vial equipped with a stir bar was charged with the methyl ester **2m** (100.0 mg, 0.4 mmol, 1.0 equiv.), sulfamethoxazole (121.6 mg, 0.48 mmol, 1.2 equiv.) placed under a positive pressure of argon, and subjected to three evacuation/backfilling cycles. Toluene (5.0 mL) and LiHMDS (1.0 M in THF, 0.8 mL, 0.8 mmol, 2.0 equiv.) were sequentially added with vigorous stirring at room temperature, and the reaction mixture was stirred at room temperature overnight. The reaction mixture was quenched with aqueous  $\text{NH}_4\text{Cl}$  solution, diluted with ethyl acetate (5.0 mL), the organic layer was washed with water, brine, dried over anhydrous  $\text{Na}_2\text{SO}_4$ , filtered and concentrated under reduced pressure. The residue was purified by silica gel flash column chromatography (petroleum ether/ethyl acetate = 20:1) to give compound **12** (135.5 mg, 72% yield, 96% *ee*) as a yellow oil.  $[\alpha]_D^{25} = -30.51$  ( $c = 0.3$ ,  $\text{CHCl}_3$ ).  $^1\text{H}$  NMR (400 MHz, Methanol- $d_4$ )  $\delta$  7.88 – 7.78 (m, 4H), 7.37 – 7.21 (m, 5H), 6.13 (s, 1H), 3.90 – 3.86 (m, 1H), 3.84 – 3.81 (m, 1H), 3.34 – 3.32 (m, 1H), 3.01 (dd,  $J = 10.0, 3.6$  Hz, 1H), 2.94 (dd,  $J = 12.4, 4.4$  Hz, 1H), 2.30 – 2.26 (m, 4H), 2.13 – 2.02 (m, 1H), 1.88 – 1.71 (m, 2H), 1.69 – 1.58 (m, 1H).  $^{13}\text{C}$  NMR (100 MHz, Methanol- $d_4$ )  $\delta$  175.4, 172.1, 159.3, 144.3, 138.4, 135.5, 130.3, 129.5, 129.4, 128.4, 120.4, 96.5, 68.7, 65.5, 61.6, 57.0, 30.6, 25.3, 12.3. HRMS (ESI)  $m/z$  calcd for  $\text{C}_{23}\text{H}_{27}\text{N}_4\text{O}_5\text{S}$   $[\text{M} + \text{H}]^+$ : 471.1697, found: 471.1695. HPLC: Chiralcel AD-H column, 254 nm, 30 °C, *n*-hexane/*i*-propanol = 95/5, flow = 0.7 mL/min, retention time 14.6 min (maj) and 21.4 min.

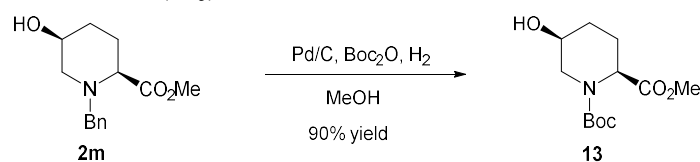

To a stirred solution of the methyl ester **2m** (100.0 mg, 0.4 mmol, 1.0 equiv.) and  $\text{Boc}_2\text{O}$  (104.8 mg, 0.48 mmol, 1.2 equiv.) in MeOH (5.0 mL) were added 10% Pd/C (10.0 mg, 10.0 wt%). The resulting mixture was stirred overnight at room temperature under  $\text{H}_2$  (50 psi) and then filtered, washed with MeOH and concentrated under reduced pressure. The residue was purified by silica gel flash column chromatography (petroleum ether/ethyl acetate = 10:1) to give compound **13** (93.3 mg, 90% yield) as a pale-yellow oil.  $[\alpha]_D^{20} = -19.7$  ( $c = 1.0$ , MeOH) [Lit.<sup>2</sup>  $[\alpha]_D^{20} = -17.7$  ( $c = 1.3$ , MeOH), Lit.<sup>3</sup>  $[\alpha]_D^{20} = -20.4$  ( $c = 1.0$ , MeOH)].

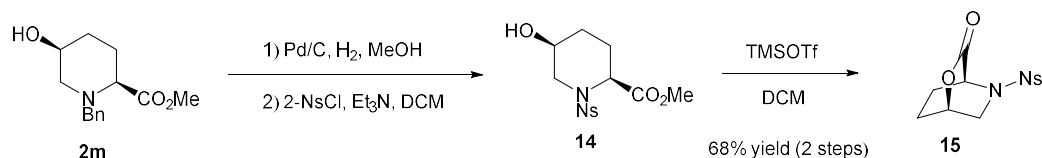

To a stirred solution of the methyl ester **2m** (100.0 mg, 0.4 mmol, 1.0 equiv.) in MeOH (5.0 mL) were added 10% Pd/C (10.0 mg, 10.0 wt%). The resulting mixture was stirred for 6 h at room temperature under  $\text{H}_2$  (1 atm, balloon) and then filtered, washed with MeOH and concentrated under reduced pressure. The crude was dissolved in DCM, 2-Nitrobenzenesulfonyl chloride and  $\text{Et}_3\text{N}$  were added. The resultant mixture was stirred for 3 h, then extracted with  $\text{CH}_2\text{Cl}_2$ . The combined organic layers were dried over  $\text{Na}_2\text{SO}_4$ , and concentrated under reduced pressure to give the residue, which was purified by flash column chromatography (petroleum ether/ethyl acetate = 50:1) to afford compound **14** as a yellow oil.  $^1\text{H}$  NMR (400 MHz, Methanol- $d_4$ )  $\delta$  8.10 – 8.04 (m, 1H), 7.84 – 7.73 (m, 3H), 4.69 – 4.67 (m, 1H), 3.94 – 3.89 (m, 1H), 3.59 (s, 3H), 3.58 – 3.50 (m, 1H), 2.99 (dd,  $J = 12.4, 10.8$  Hz, 1H), 2.33 – 2.25 (m, 1H), 1.98 –

1.80 (m, 2H), 1.23 – 1.10 (m, 1H).  $^{13}\text{C}$  NMR (100 MHz, Methanol- $d_4$ )  $\delta$  171.9, 149.1, 135.3, 133.8, 133.1, 131.7, 125.4, 67.1, 56.2, 52.8, 50.0, 30.6, 27.3. HRMS (ESI)  $m/z$  calcd for  $\text{C}_{13}\text{H}_{17}\text{N}_2\text{O}_7\text{S}$   $[\text{M} + \text{H}]^+$ : 345.0751, found: 345.0755.

To a stirred solution of the methyl ester **14** (137.7 mg, 0.4 mmol, 1.0 equiv.) in dry DCM (6.0 mL) was added TMSOTf (144.8  $\mu\text{L}$ , 0.8 mmol, 2.0 equiv.). The resulting mixture was stirred overnight at room temperature, then quenched with aqueous  $\text{NH}_4\text{Cl}$  solution, extracted with ethyl acetate. Organic phases were combined and dried over anhydrous  $\text{Na}_2\text{SO}_4$ , filtered and the solvent was evaporated under reduced pressure. The residue was purified by silica gel flash column chromatography (petroleum ether/ethyl acetate = 50:1) to give compound **15** (85.2 mg, 68% yield over 2 steps) as a white crystal, m.p. = 130.6 – 132.5  $^\circ\text{C}$ .

### 3. References

1. W.-X. Huang, C.-B. Yu, Y. Ji, L.-J. Liu, Y.-G. Zhou, *ACS Catal.* **2016**, 6, 2368–2371.
2. Z. Edoó, L. Iannazzo, F. Compain, I. Li de la Sierra Gallay, H. van Tilbeurgh, M. Fonvielle, F. Bouchet, E. Le Run, J. L. Mainardi, M. Arthur, M. Etheve-Quelquejeu, J. E. Hugonnet, *Chem. Eur. J.* **2018**, 24, 8081–8086.
3. Z. Yang, Y. Chen, L. Wan, X. Cen, P. Tang, F. Chen, *Chem. Commun.* **2022**, 58, 10869–10872.

## 4. NMR Spectra

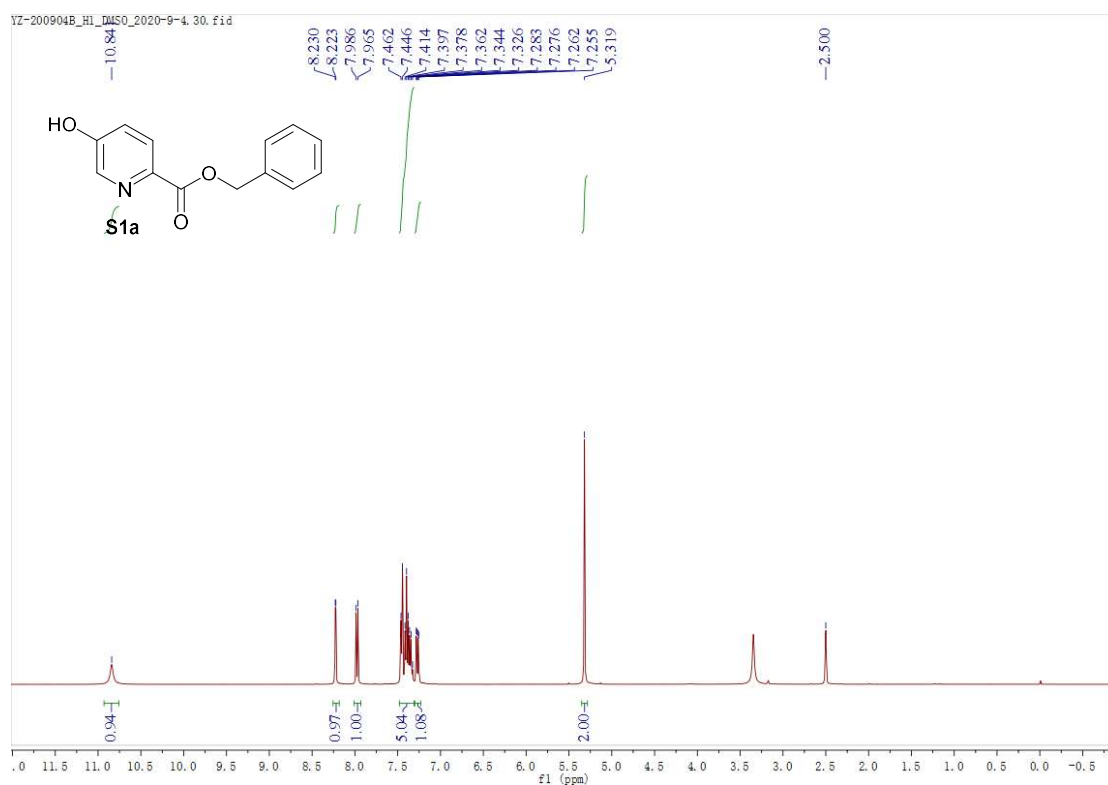

**<sup>1</sup>H-NMR Spectrum (400 MHz, DMSO-*d*<sub>6</sub>) of Compound S1a**

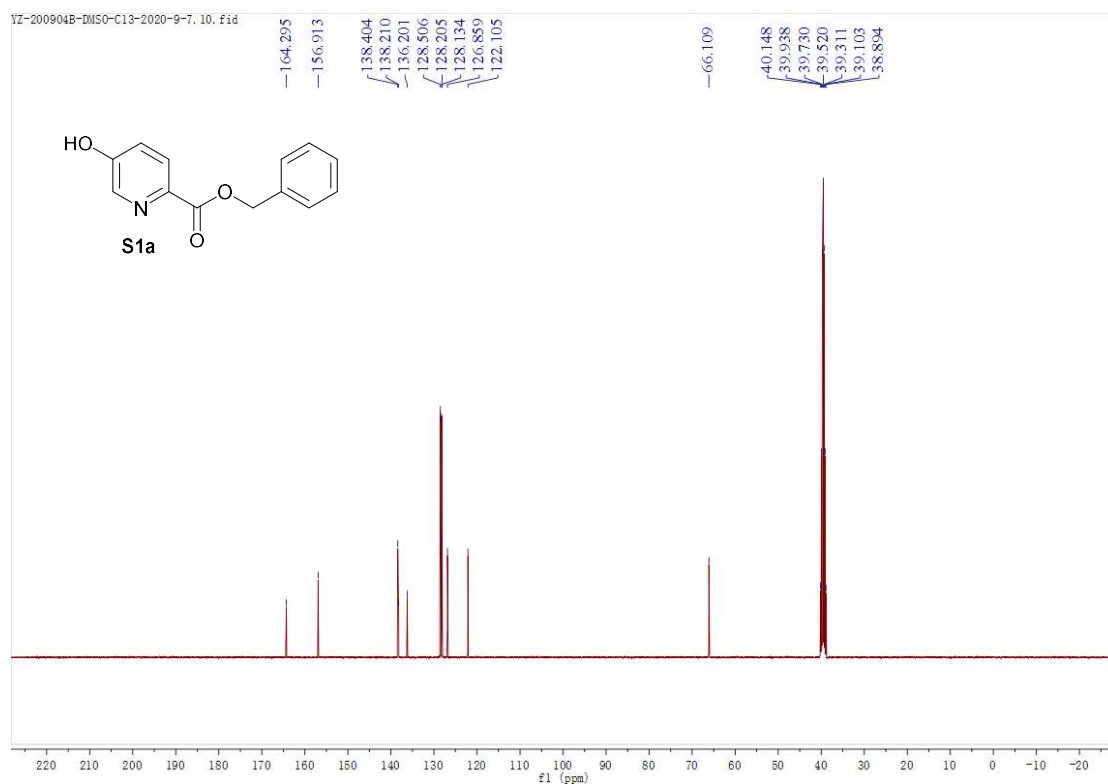

**<sup>13</sup>C-NMR Spectrum (100 MHz, DMSO-*d*<sub>6</sub>) of Compound S1a**

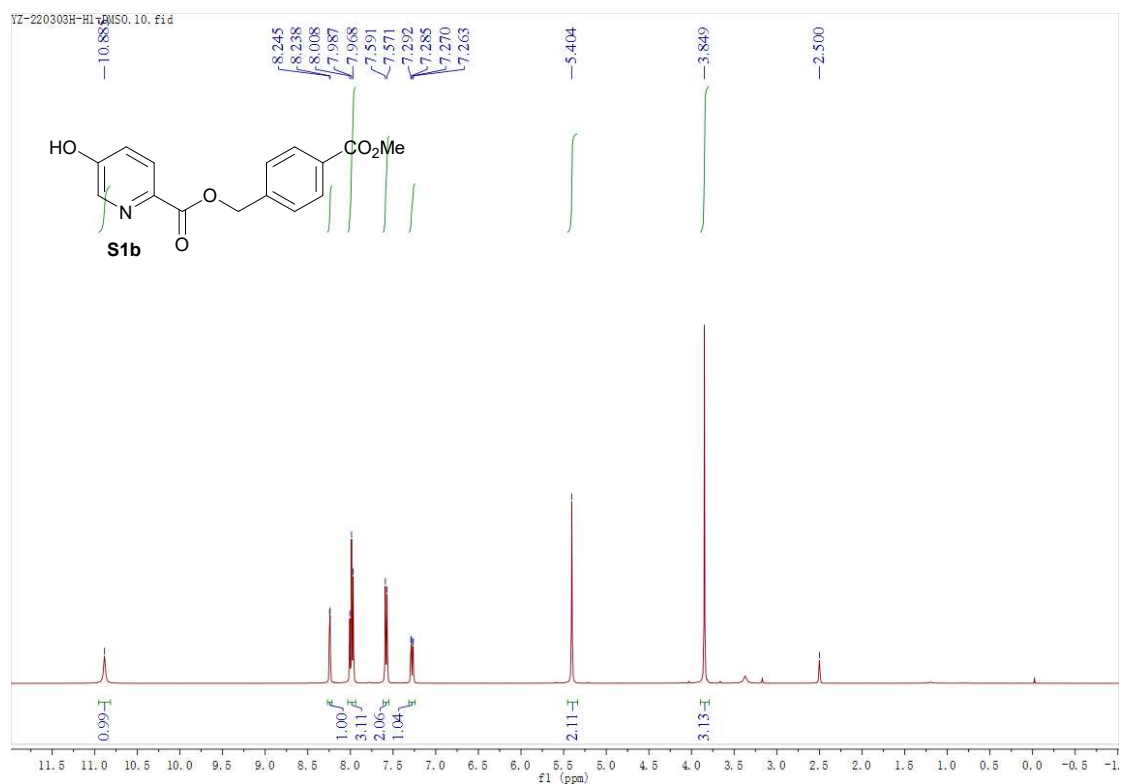

**<sup>1</sup>H-NMR Spectrum (400 MHz, DMSO-*d*<sub>6</sub>) of Compound S1b**

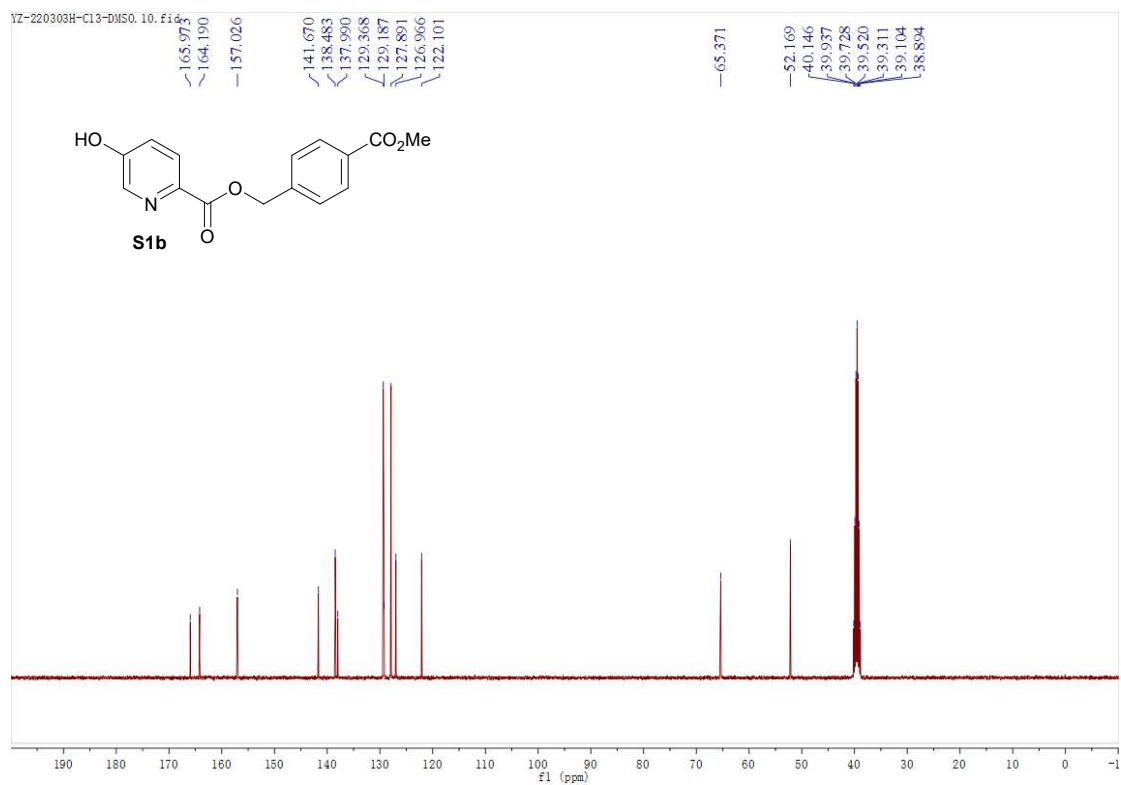

**<sup>13</sup>C-NMR Spectrum (100 MHz, DMSO-*d*<sub>6</sub>) of Compound S1b**



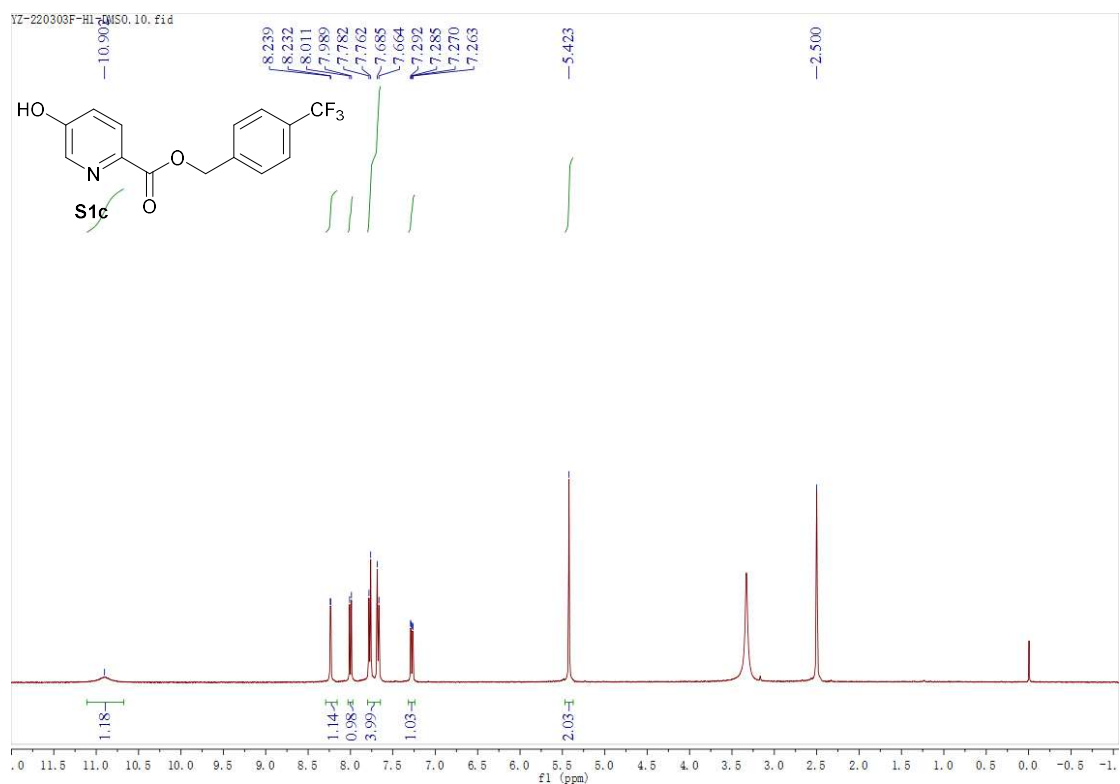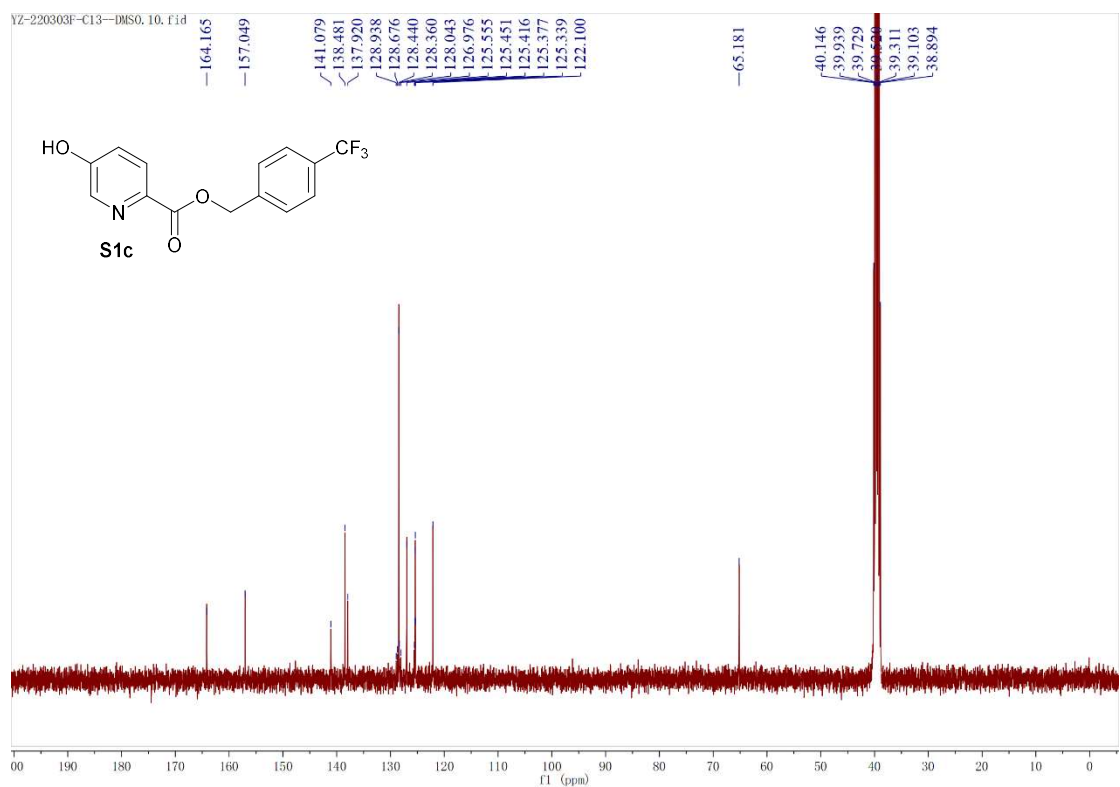

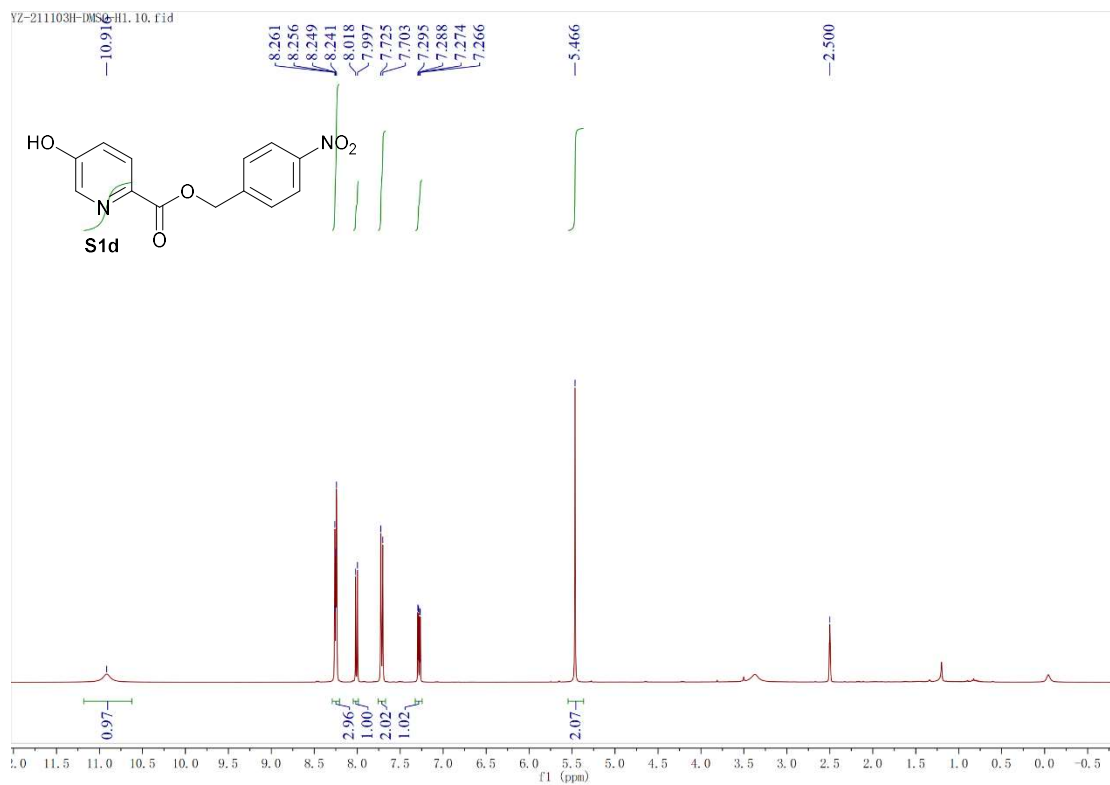

**<sup>1</sup>H-NMR Spectrum (400 MHz, DMSO-*d*<sub>6</sub>) of Compound S1d**

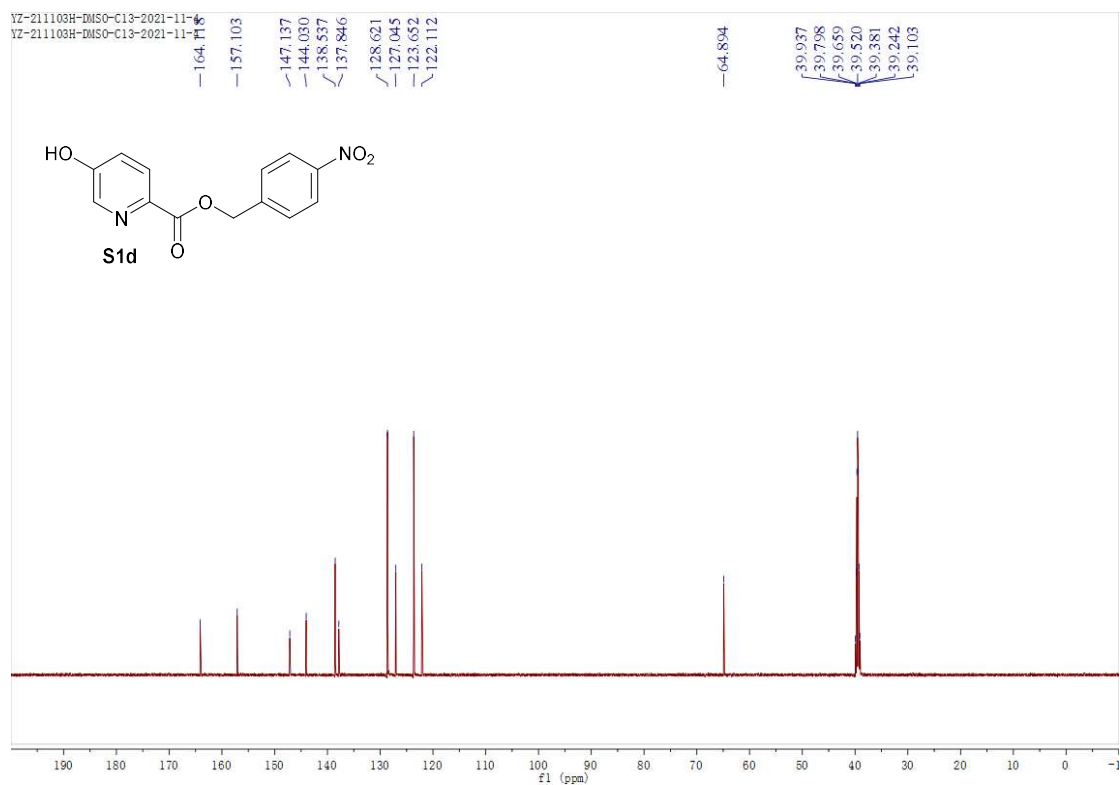

**<sup>13</sup>C-NMR Spectrum (100 MHz, DMSO-*d*<sub>6</sub>) of Compound S1d**

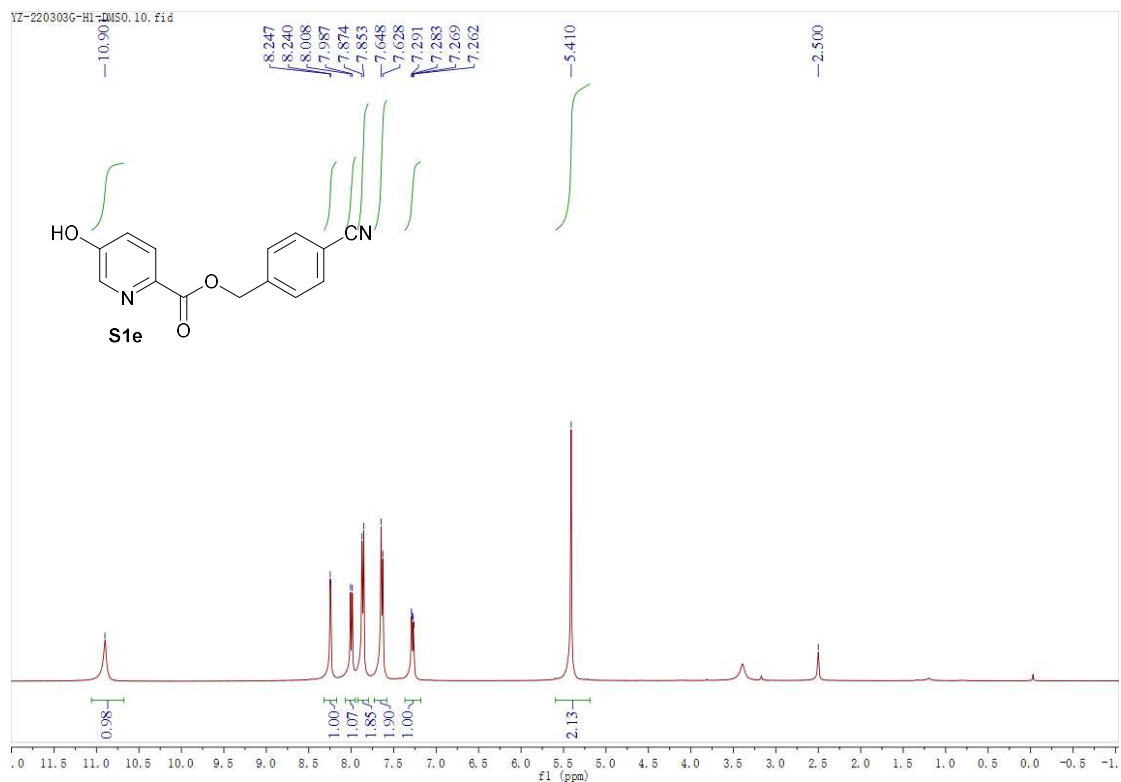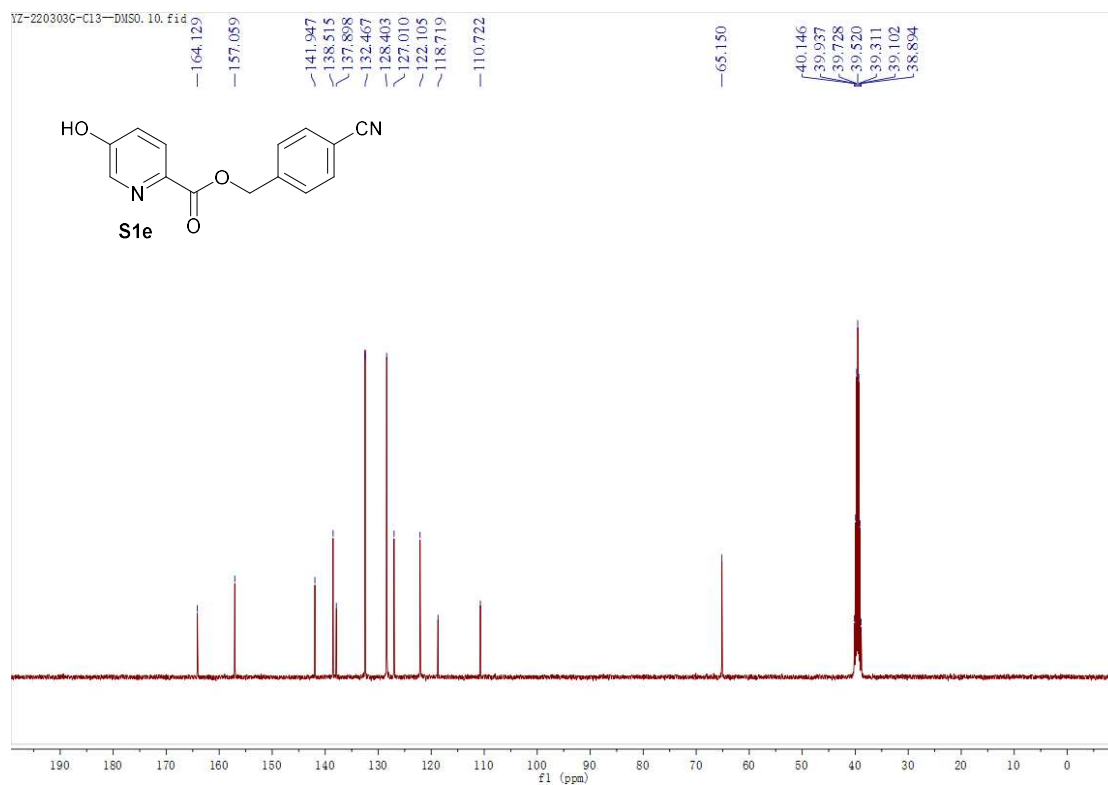

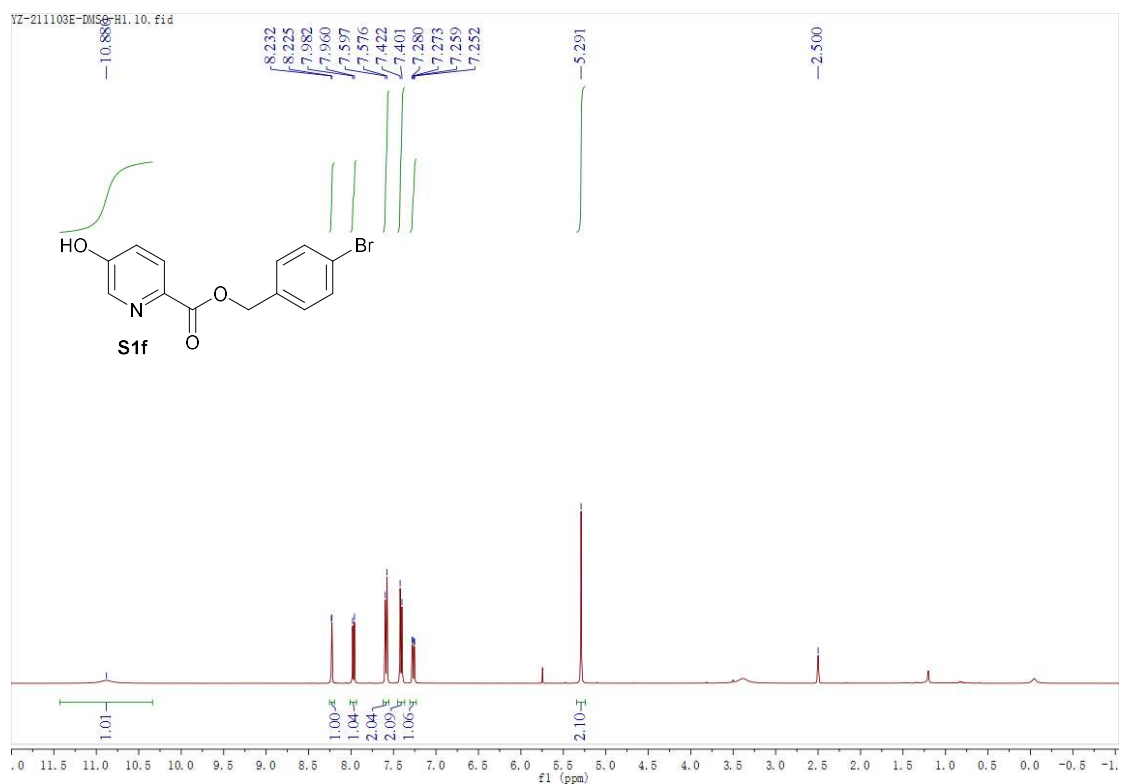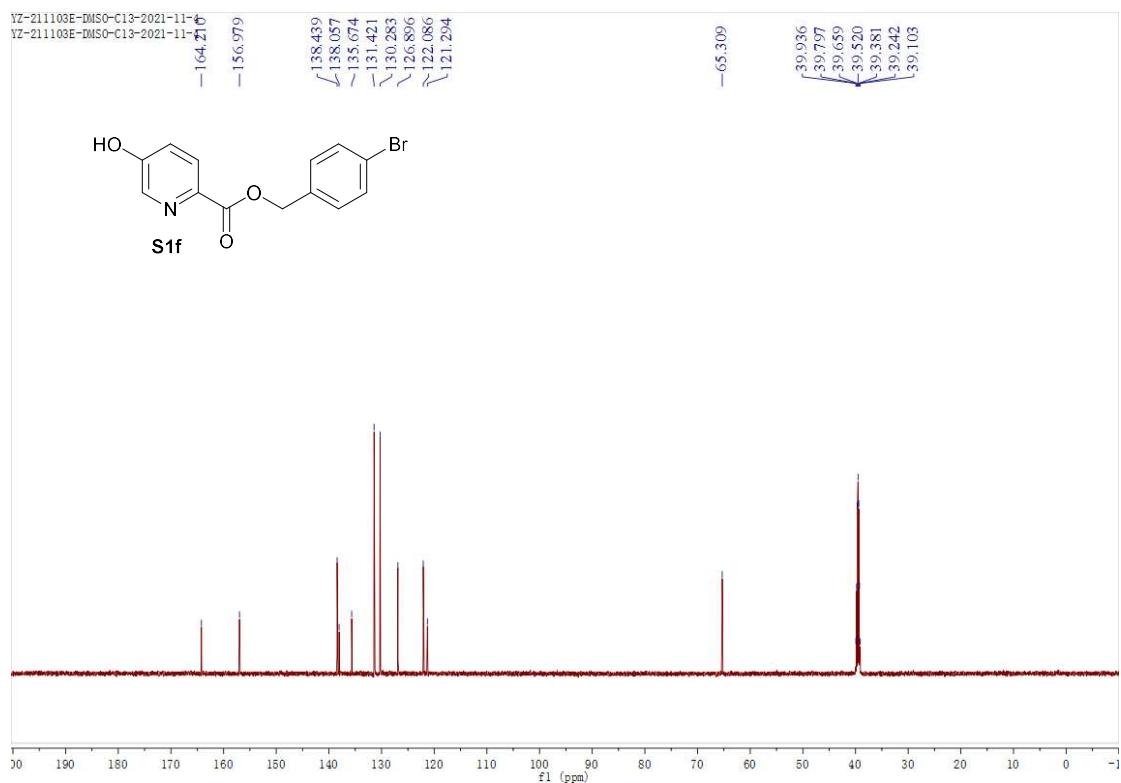

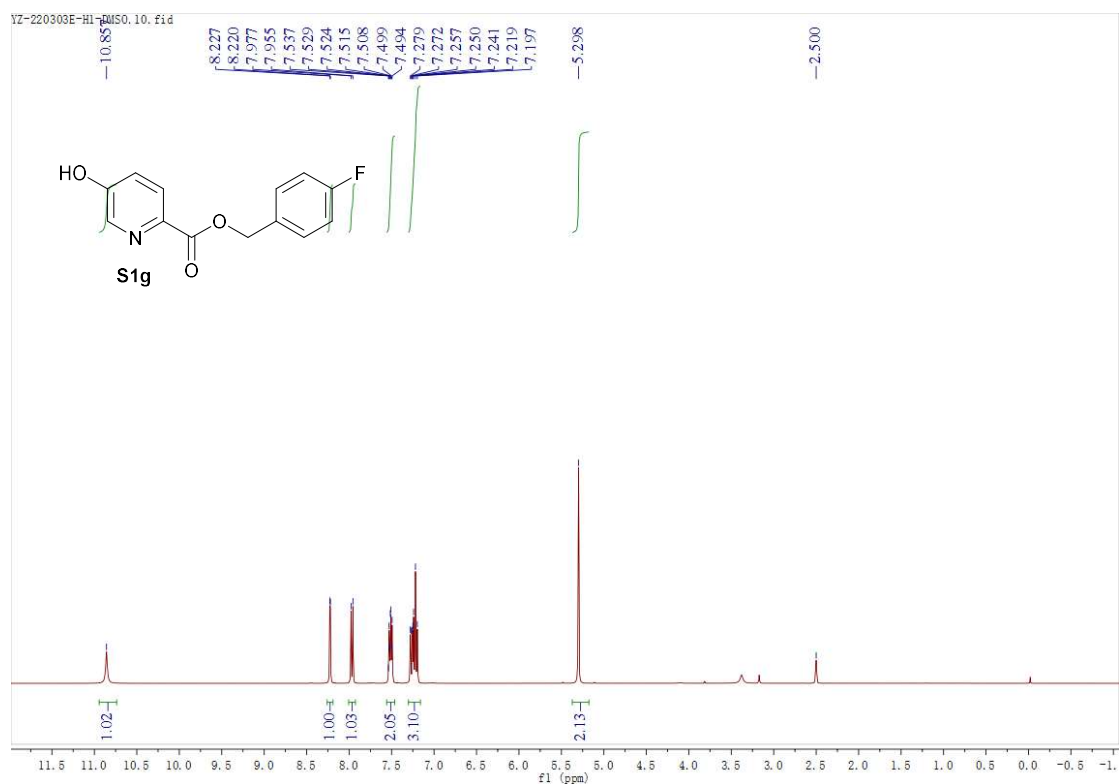

**<sup>1</sup>H-NMR Spectrum (400 MHz, DMSO-*d*<sub>6</sub>) of Compound S1g**

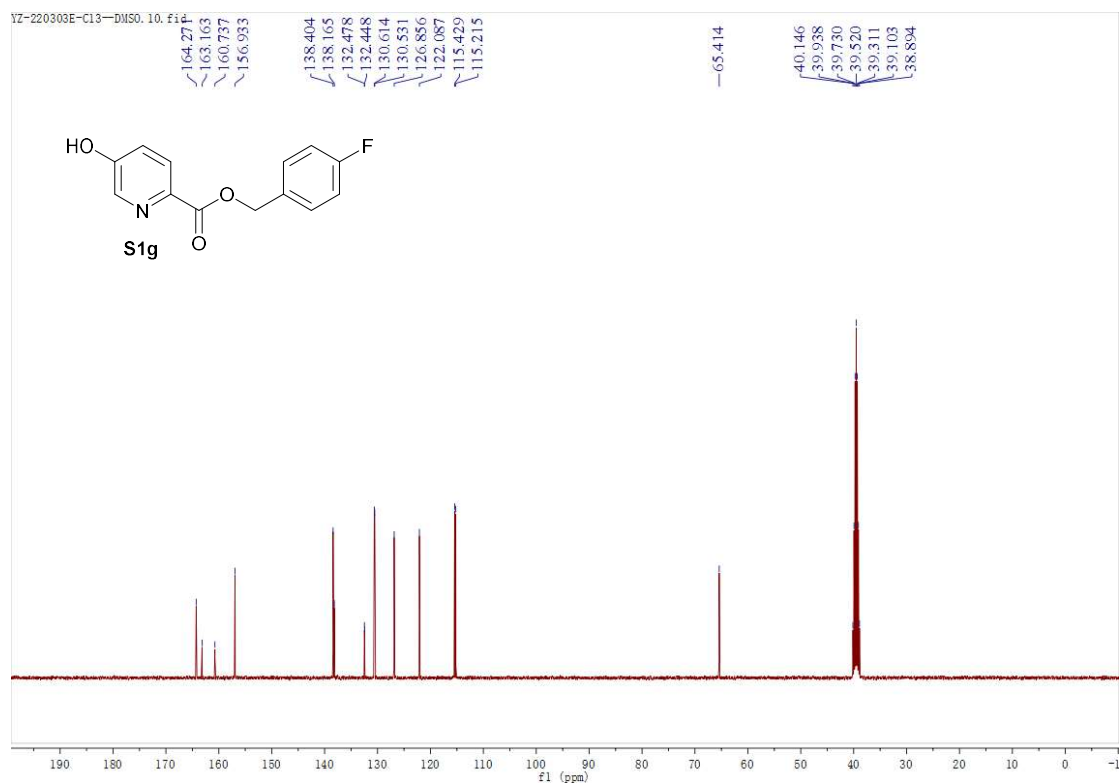

**<sup>13</sup>C-NMR Spectrum (100 MHz, DMSO-*d*<sub>6</sub>) of Compound S1g**

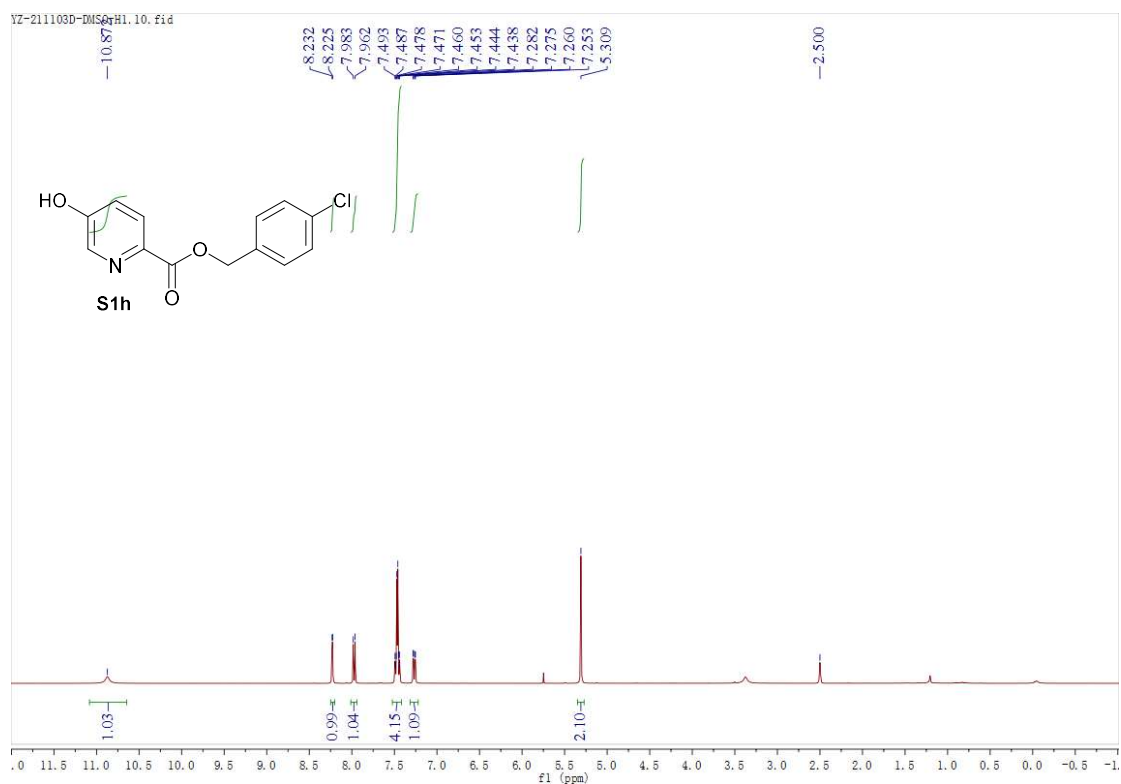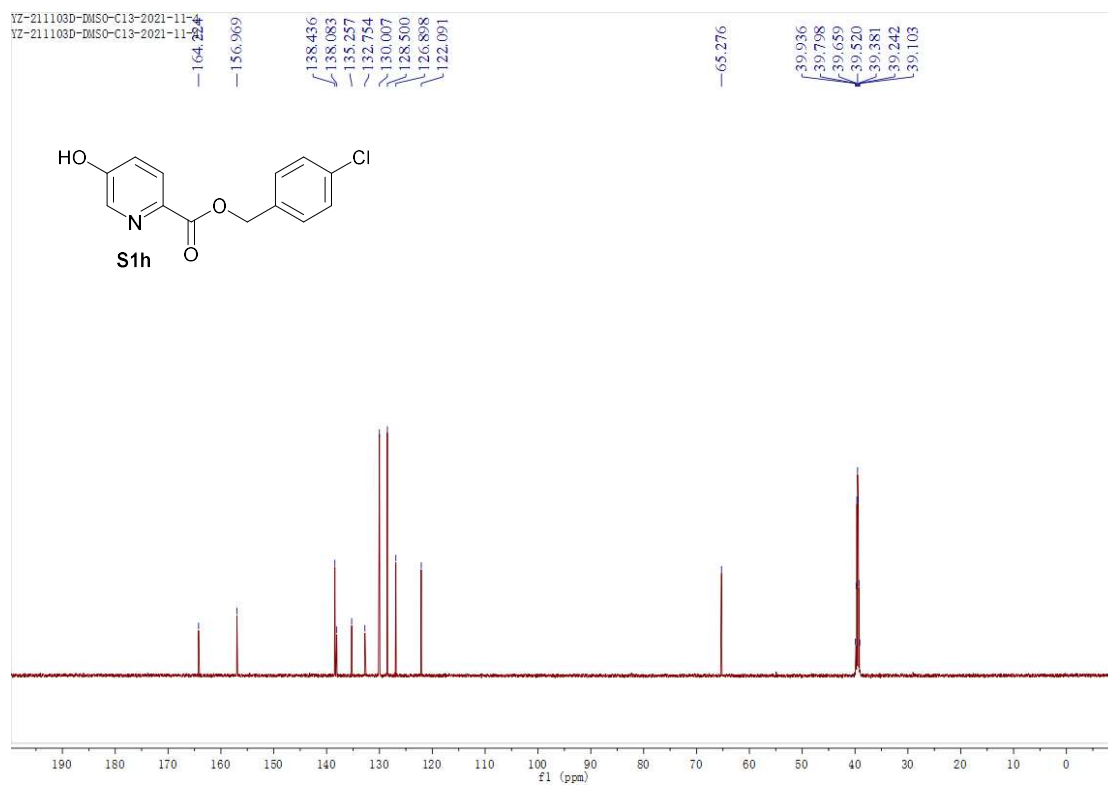

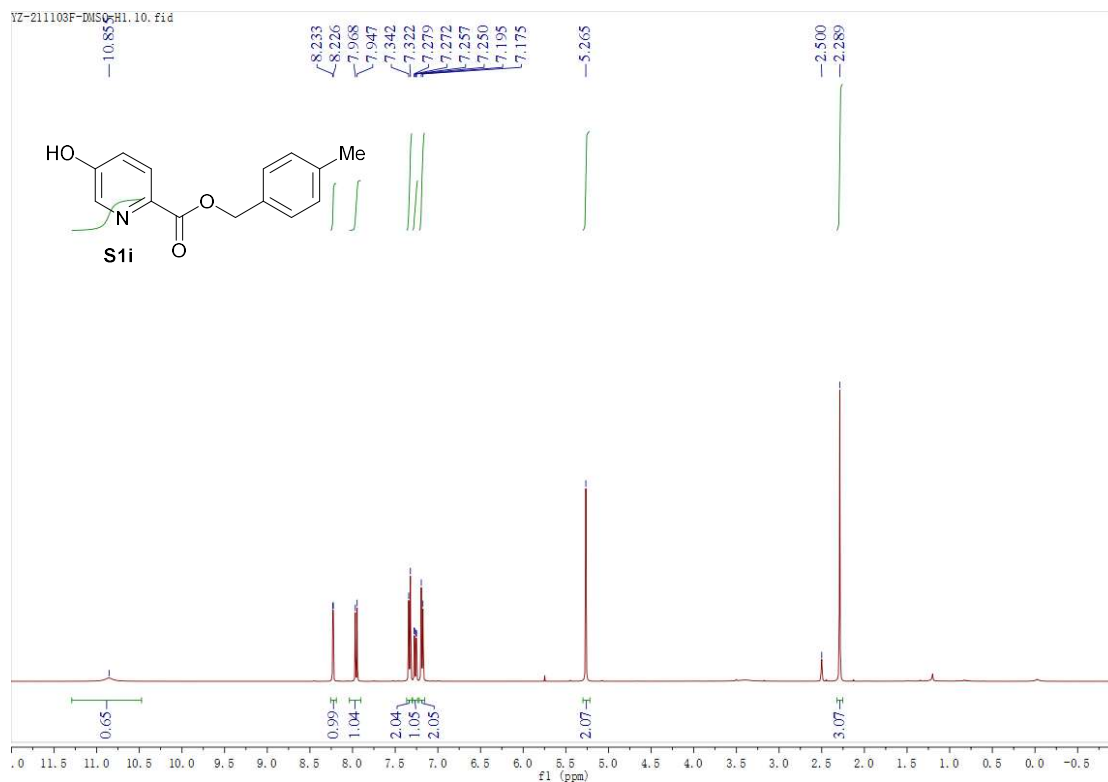

**<sup>1</sup>H-NMR Spectrum (400 MHz, DMSO-*d*<sub>6</sub>) of Compound S1i**

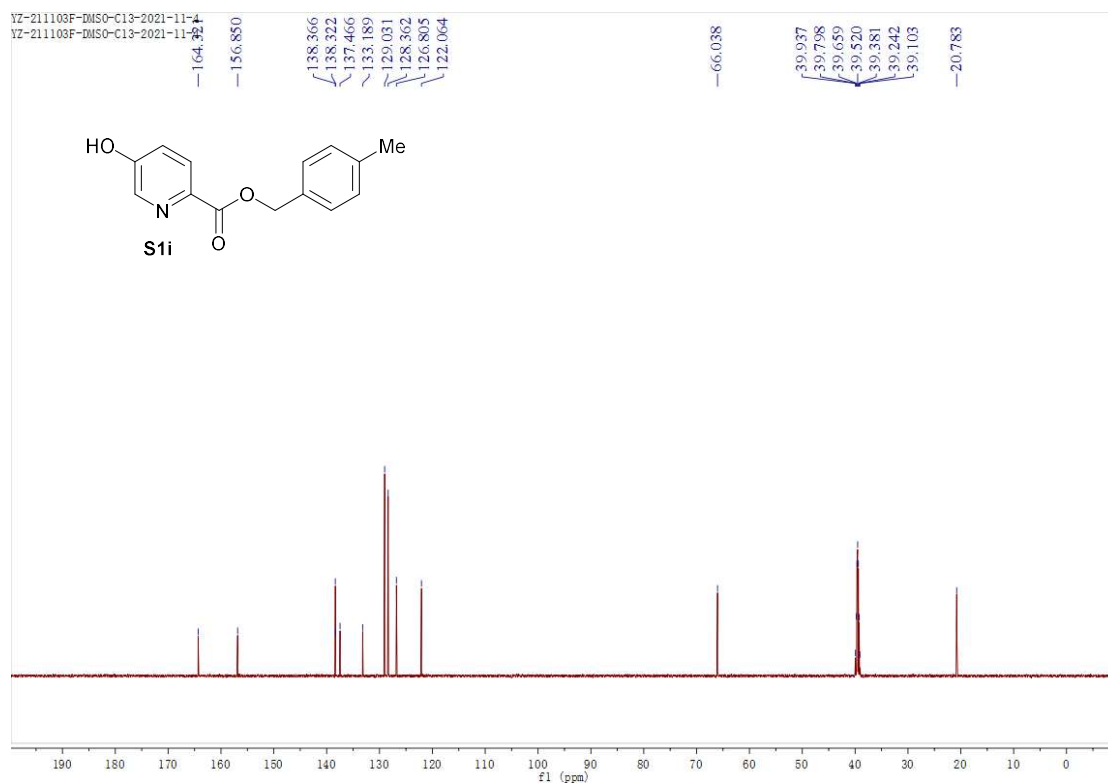

**<sup>13</sup>C-NMR Spectrum (100 MHz, DMSO-*d*<sub>6</sub>) of Compound S1i**

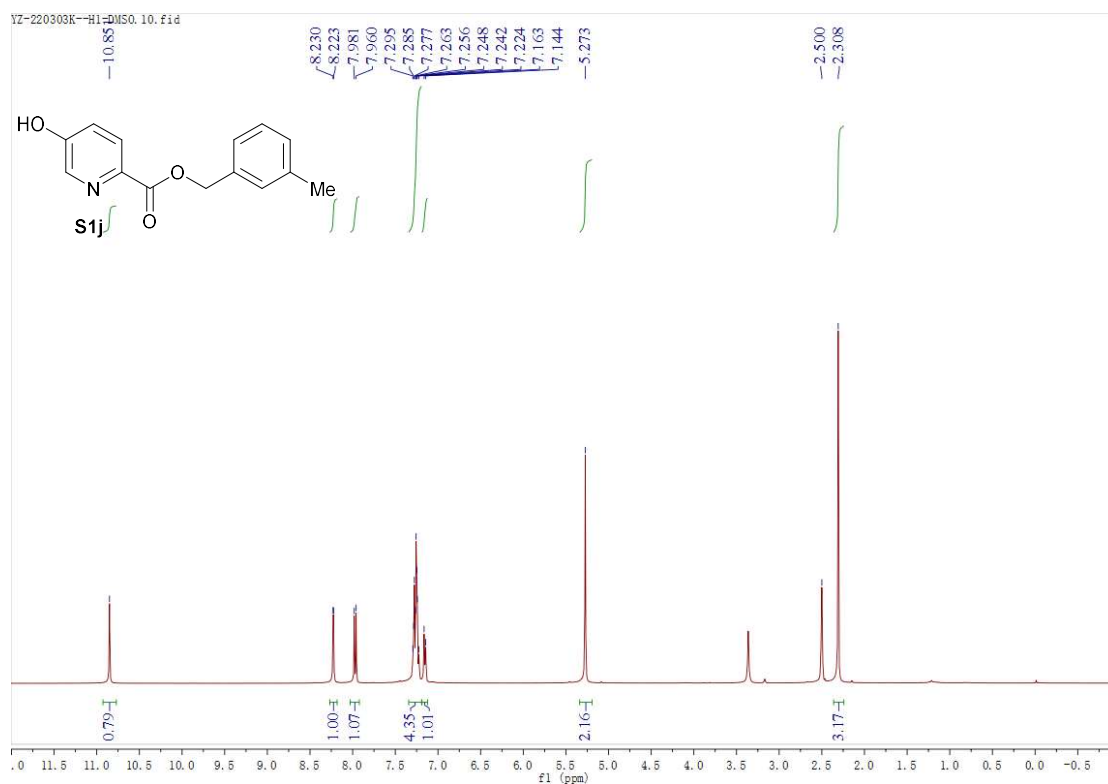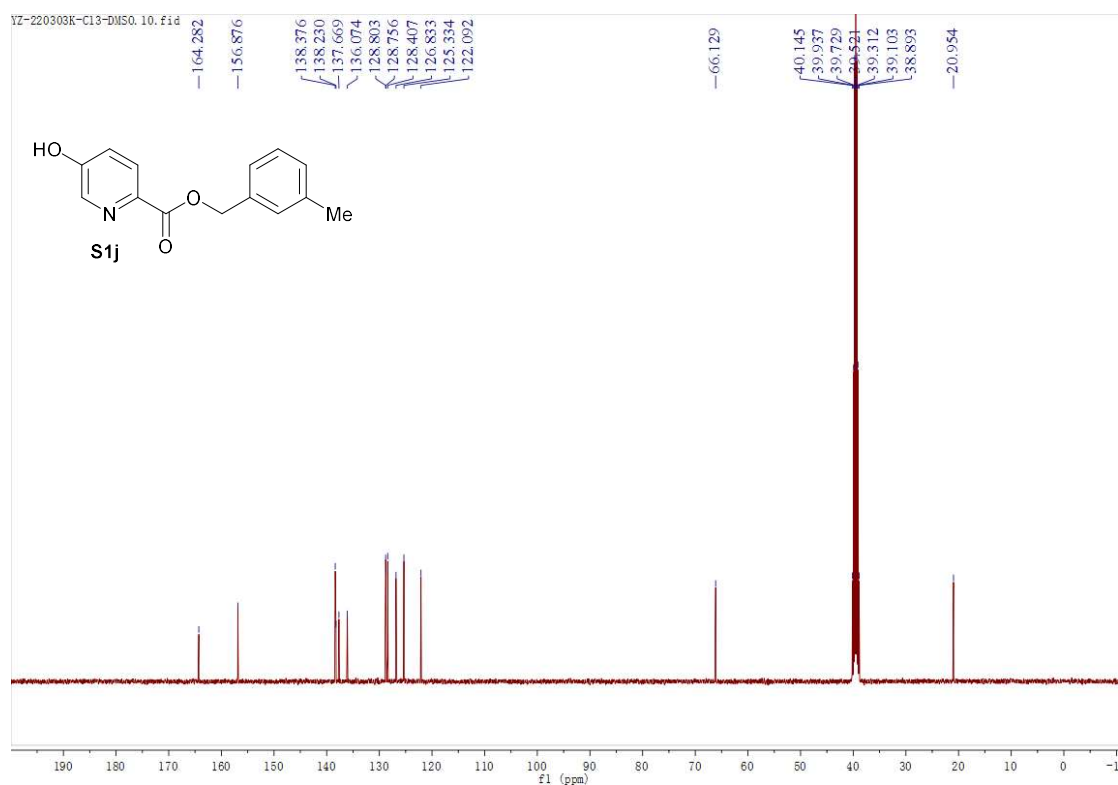



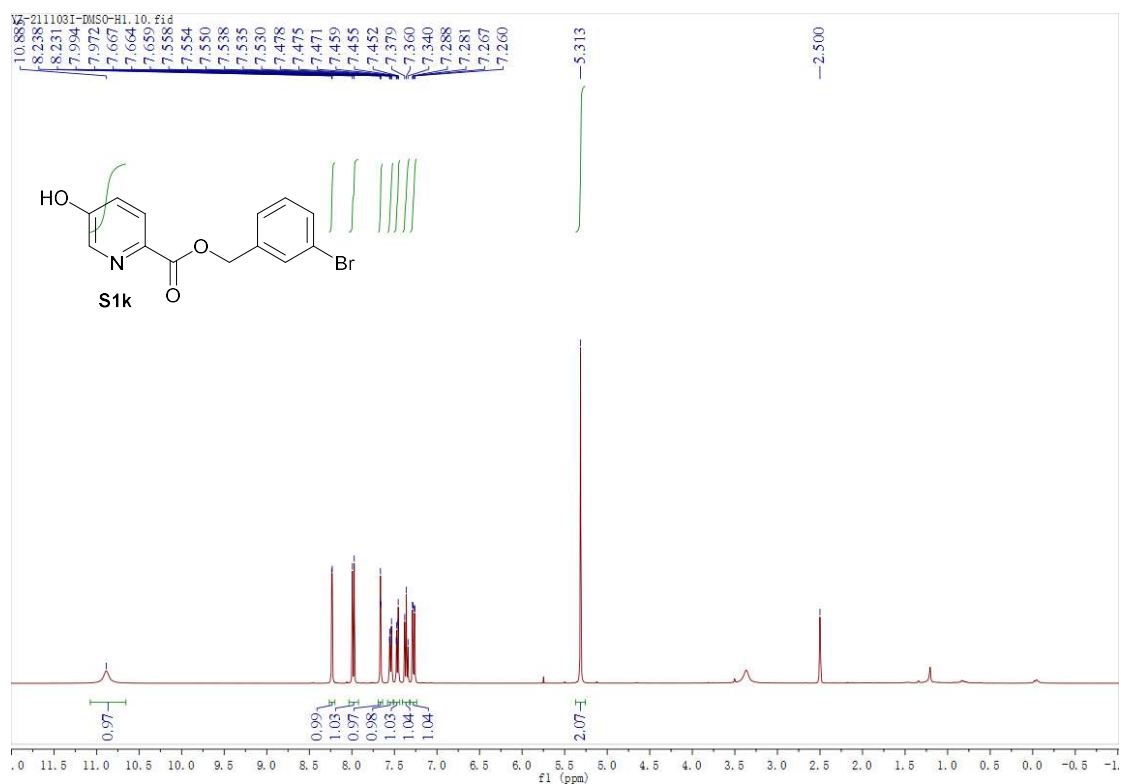

**<sup>1</sup>H-NMR Spectrum (400 MHz, DMSO-*d*<sub>6</sub>) of Compound S1k**

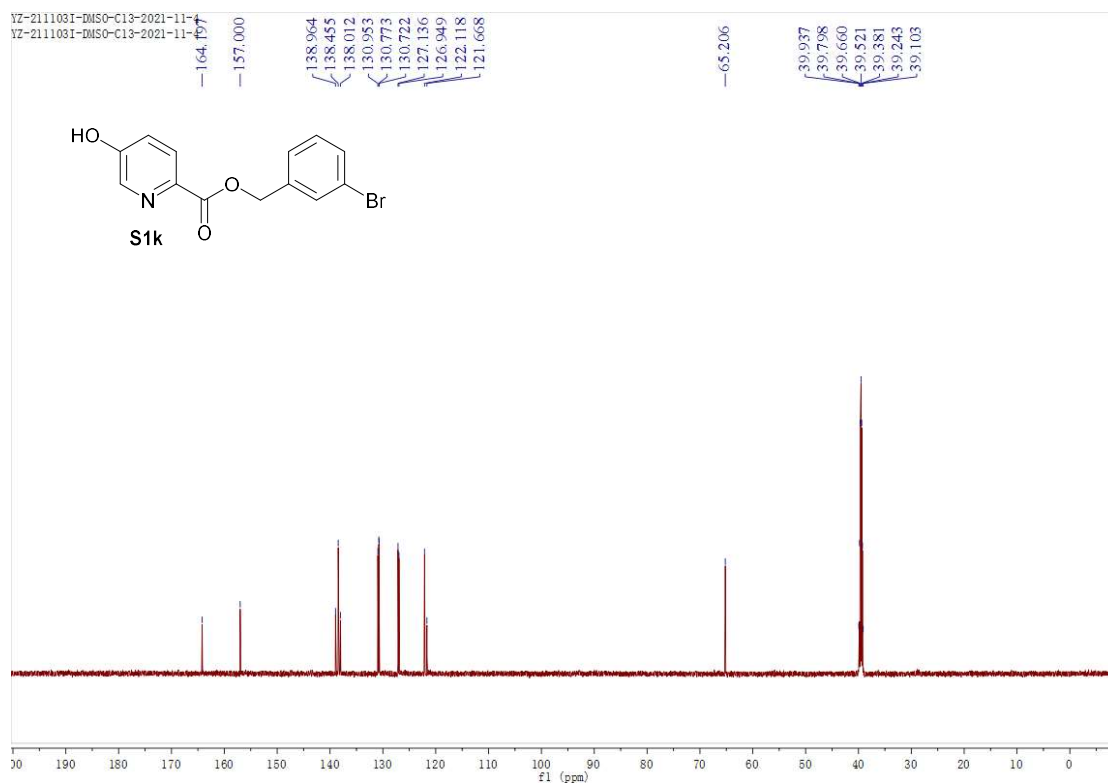

**<sup>13</sup>C-NMR Spectrum (100 MHz, DMSO-*d*<sub>6</sub>) of Compound S1k**

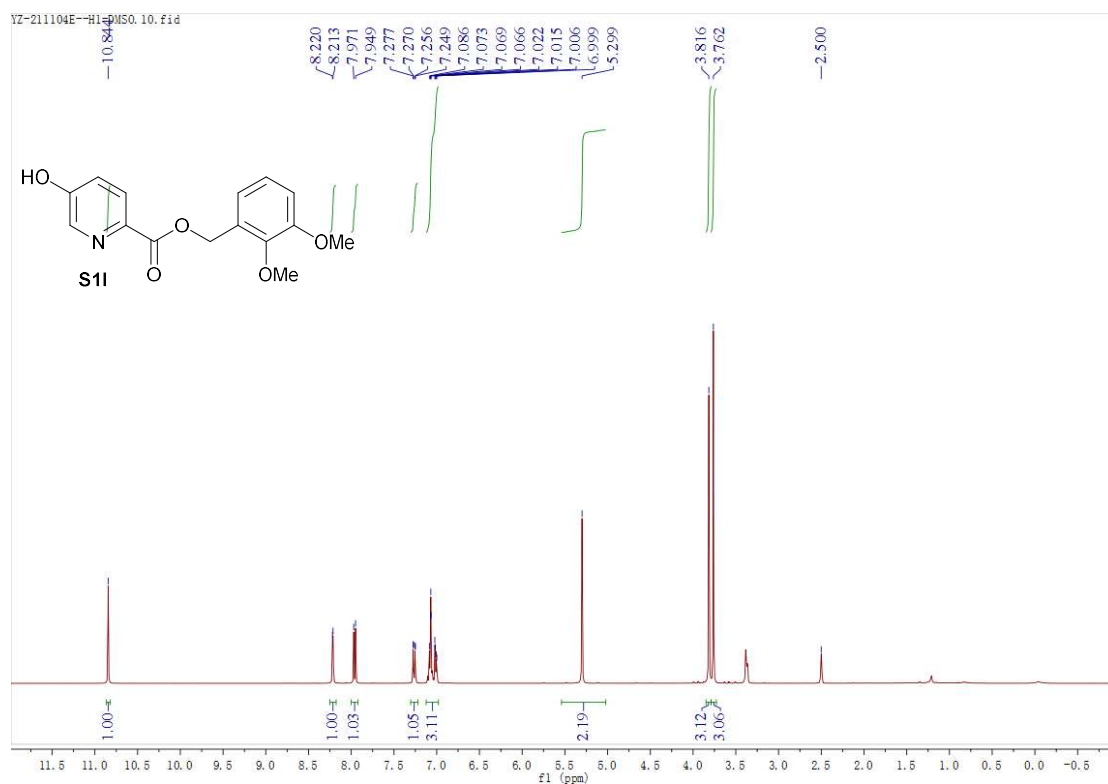

**<sup>1</sup>H-NMR Spectrum (400 MHz, DMSO-*d*<sub>6</sub>) of Compound S11**

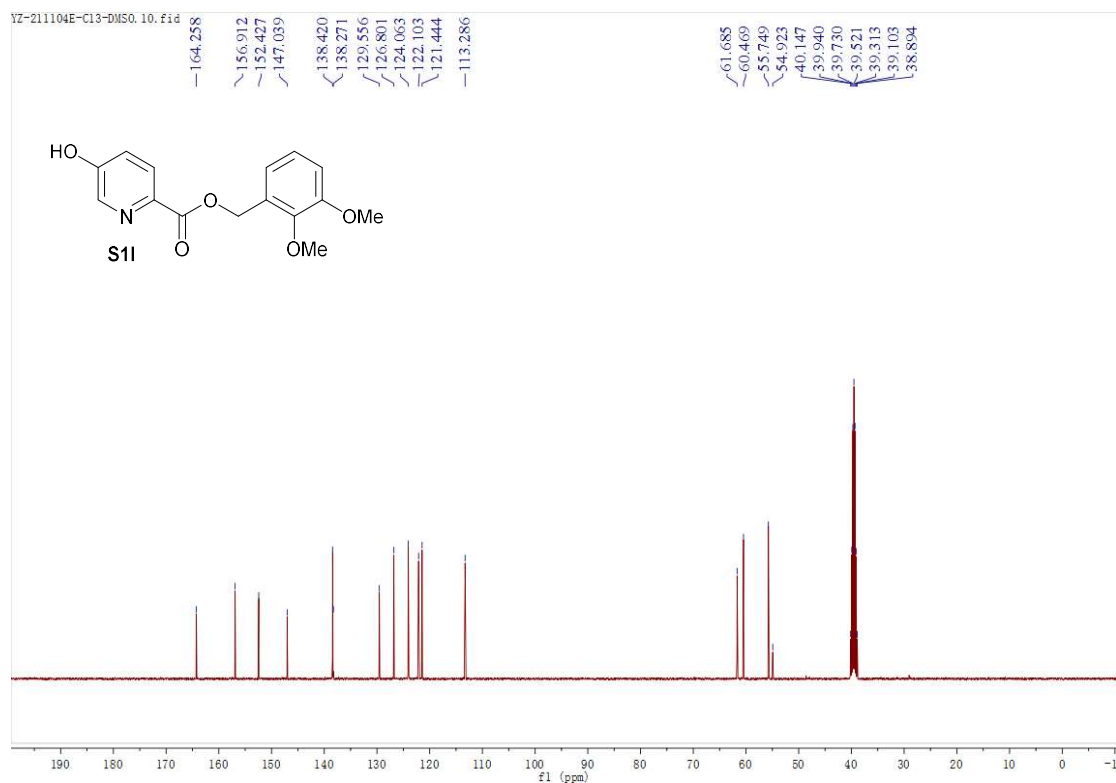

**<sup>13</sup>C-NMR Spectrum (100 MHz, DMSO-*d*<sub>6</sub>) of Compound S11**

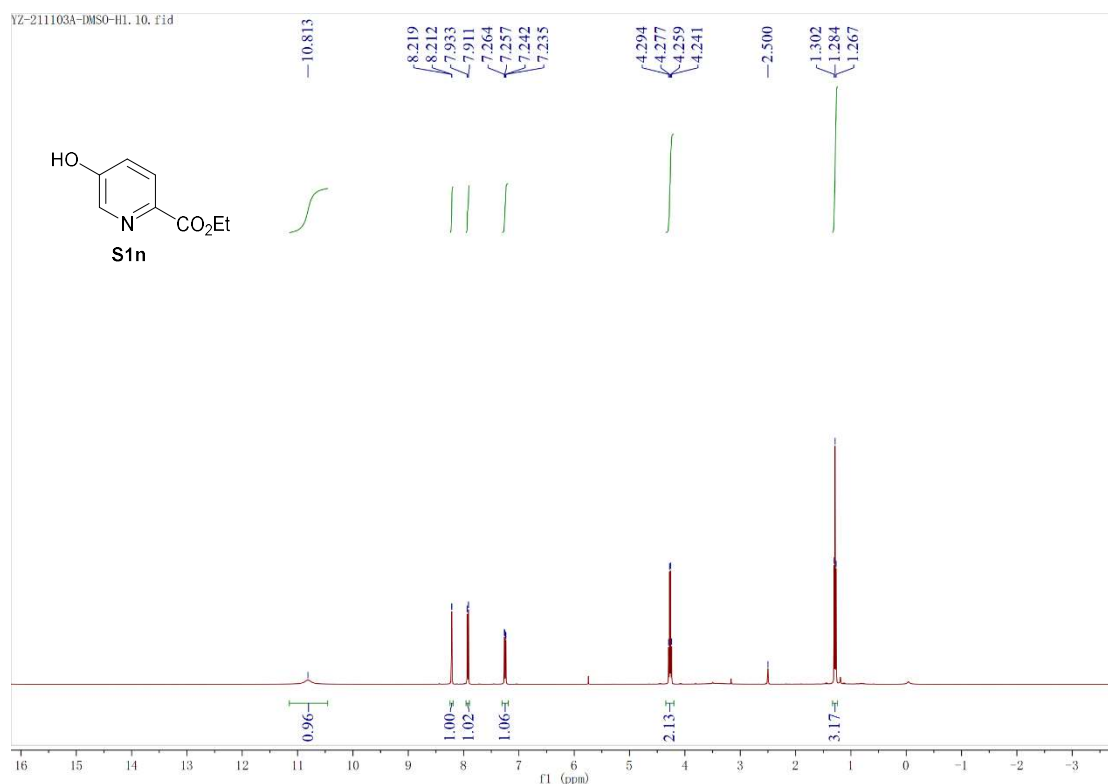

**<sup>1</sup>H-NMR Spectrum (400 MHz, DMSO-*d*<sub>6</sub>) of Compound S1n**

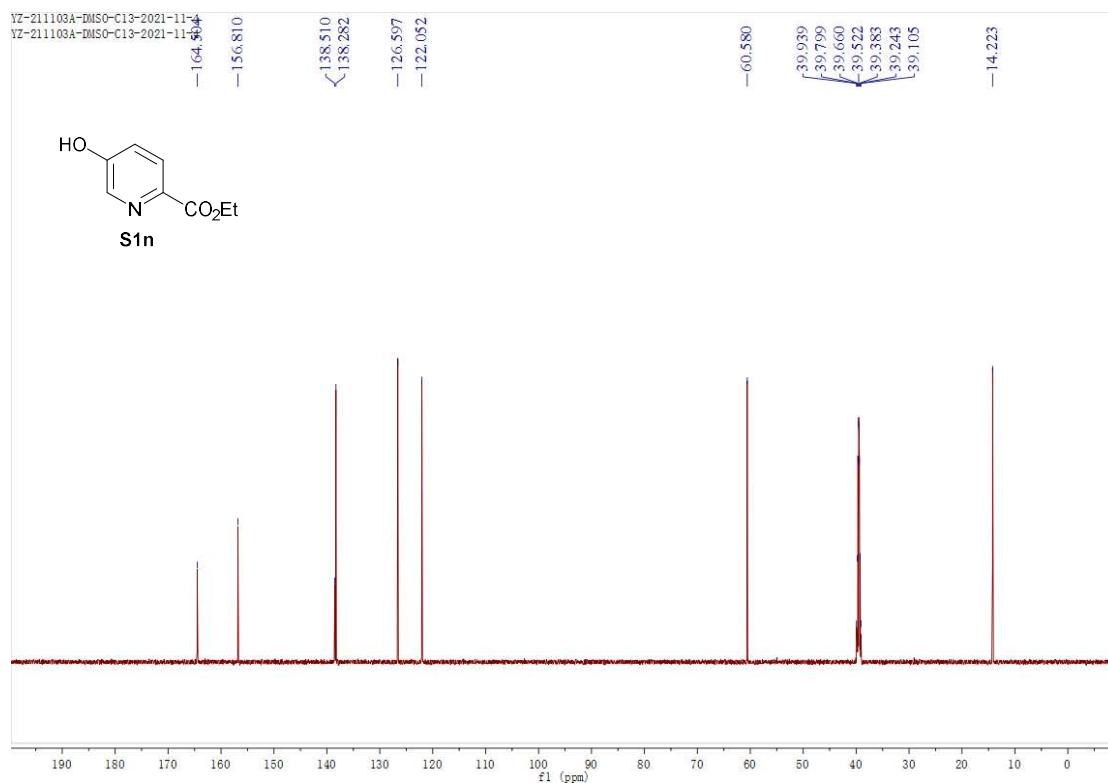

**<sup>13</sup>C-NMR Spectrum (100 MHz, DMSO-*d*<sub>6</sub>) of Compound S1n**

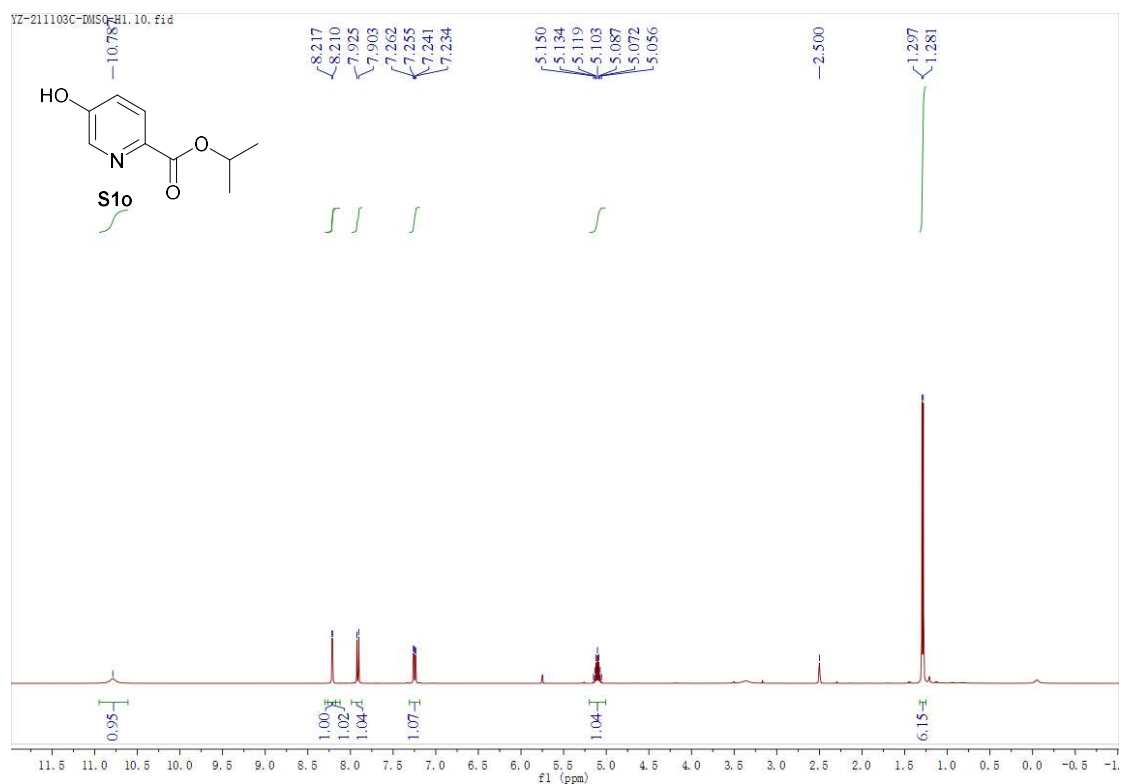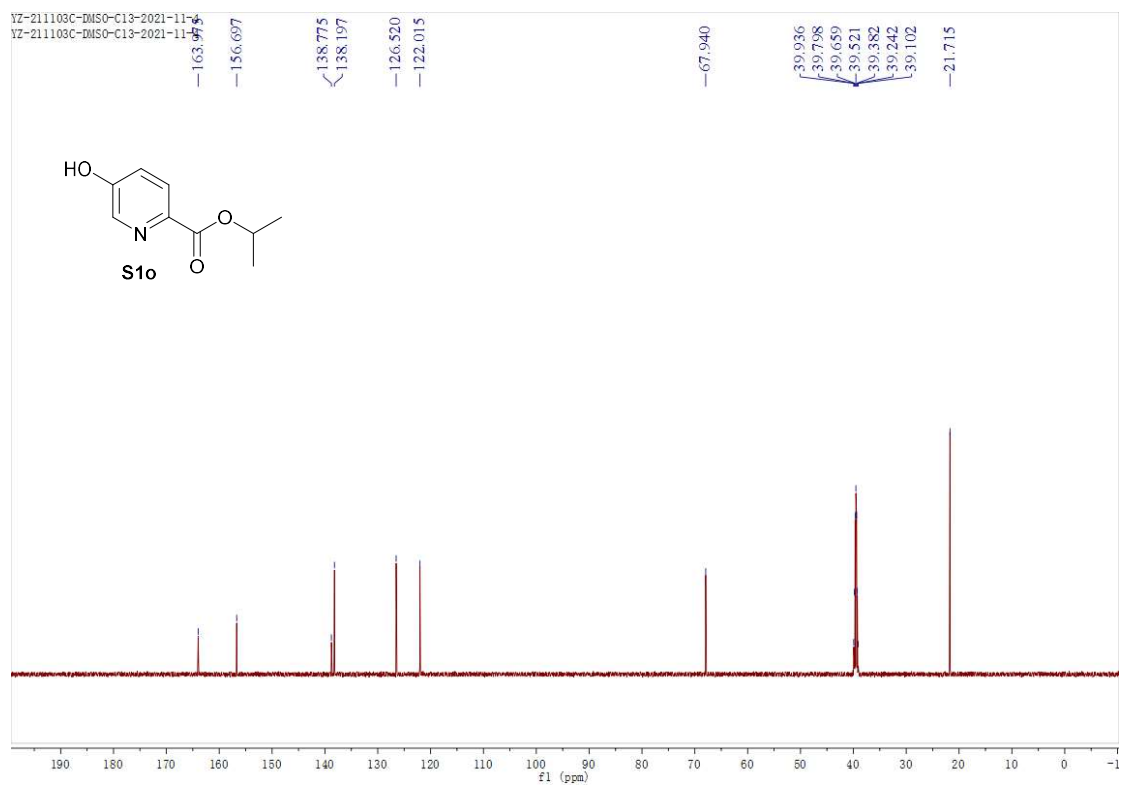

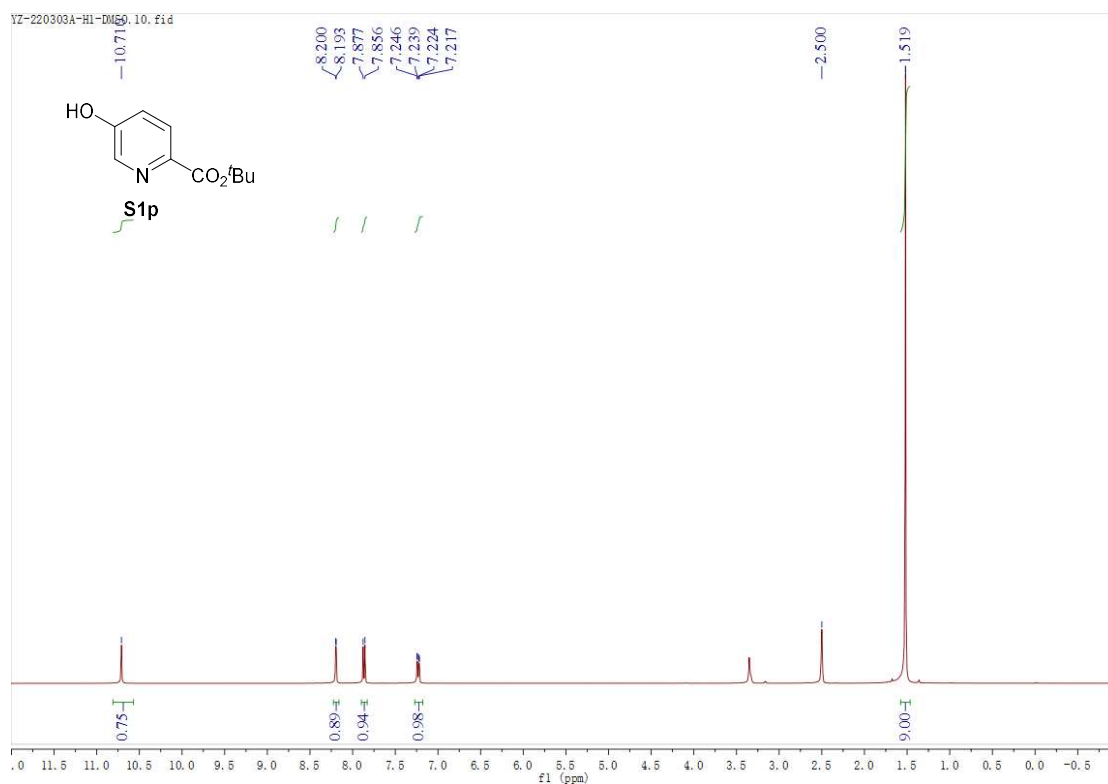

**<sup>1</sup>H-NMR Spectrum (400 MHz, DMSO-*d*<sub>6</sub>) of Compound S1p**

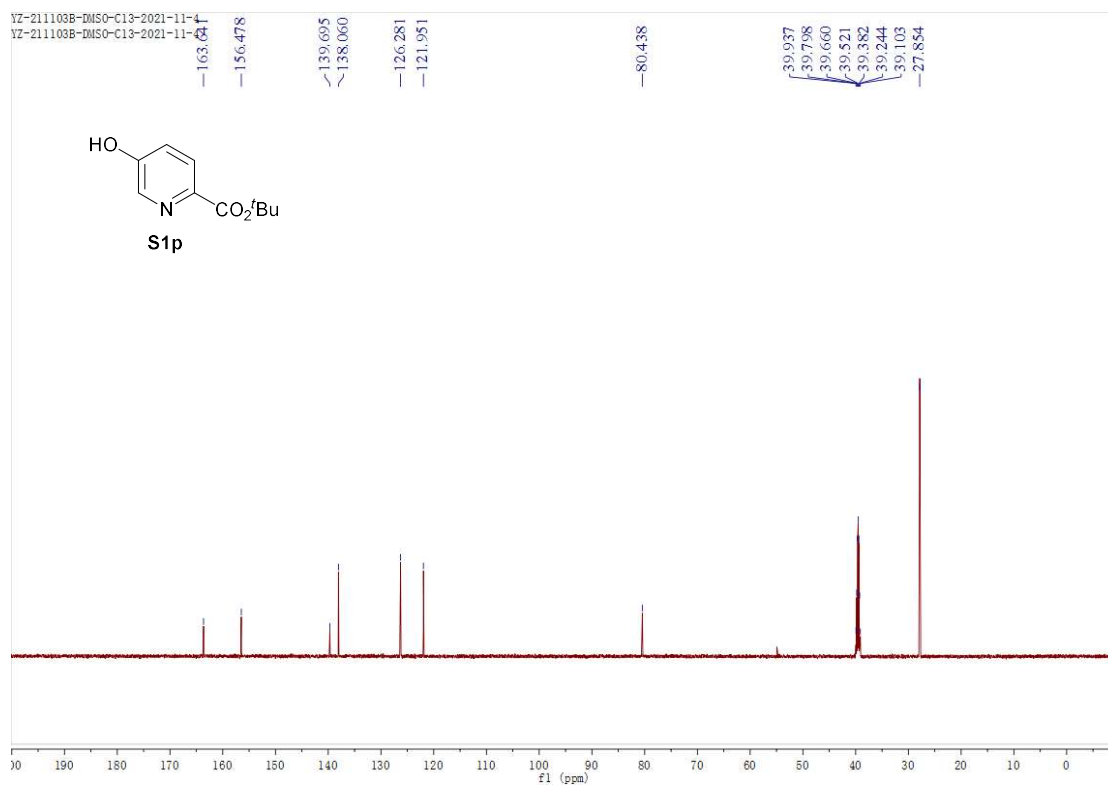

**<sup>13</sup>C-NMR Spectrum (100 MHz, DMSO-*d*<sub>6</sub>) of Compound S1p**

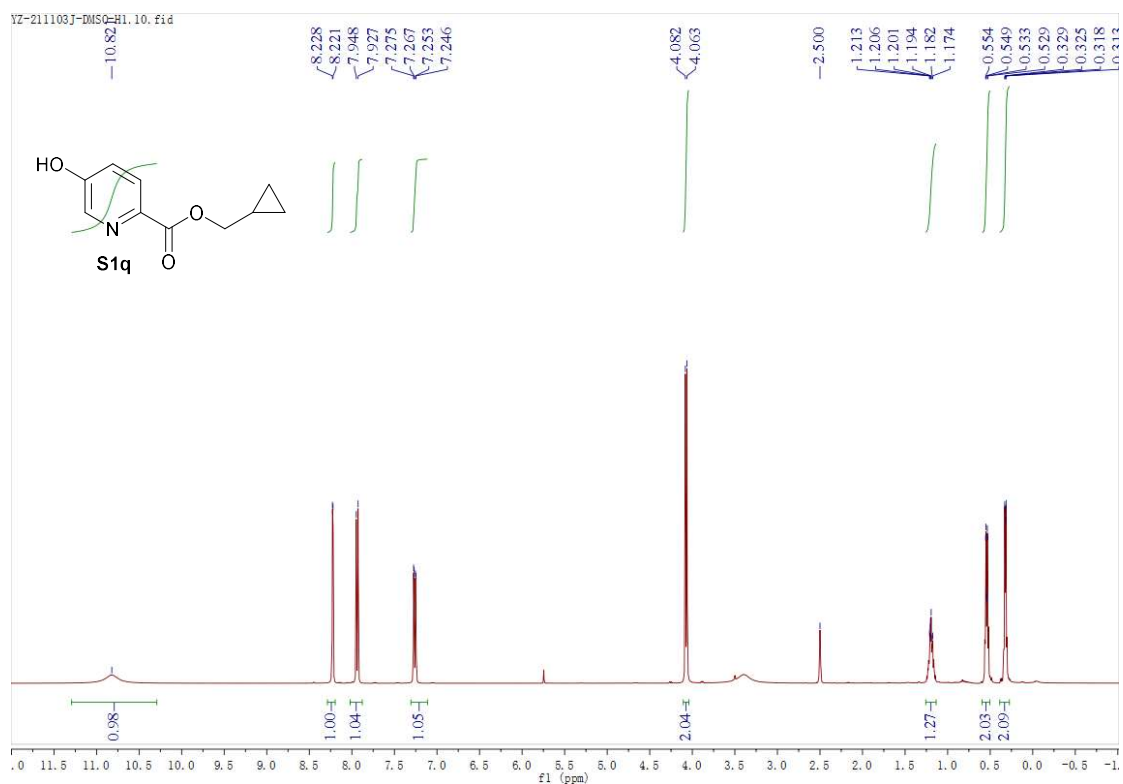

**<sup>1</sup>H-NMR Spectrum (400 MHz, DMSO-*d*<sub>6</sub>) of Compound S1q**

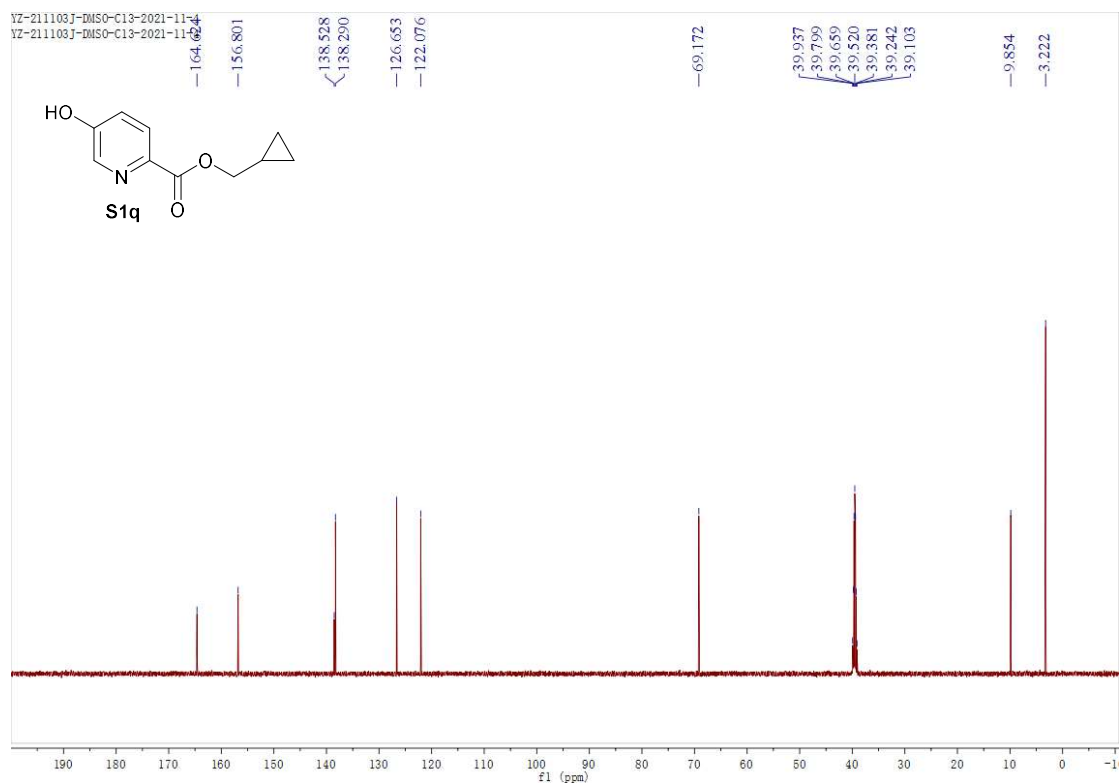

**<sup>13</sup>C-NMR Spectrum (100 MHz, DMSO-*d*<sub>6</sub>) of Compound S1q**

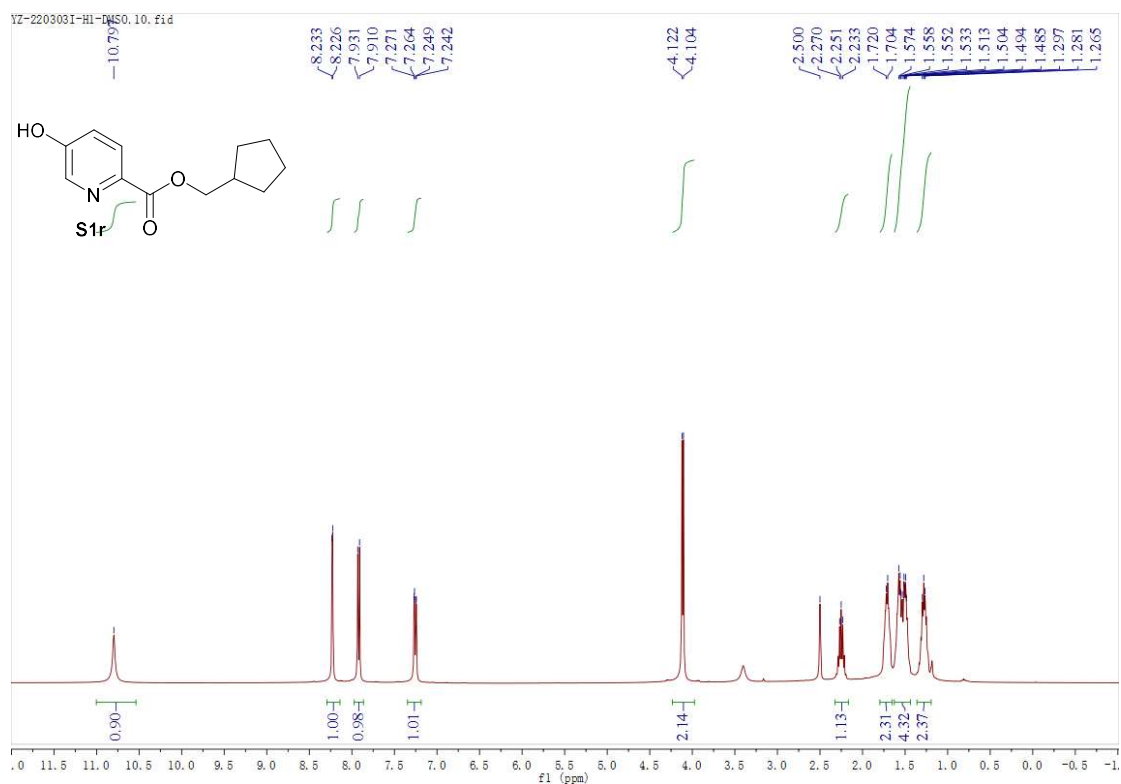

**<sup>1</sup>H-NMR Spectrum (400 MHz, DMSO-*d*<sub>6</sub>) of Compound S1r**

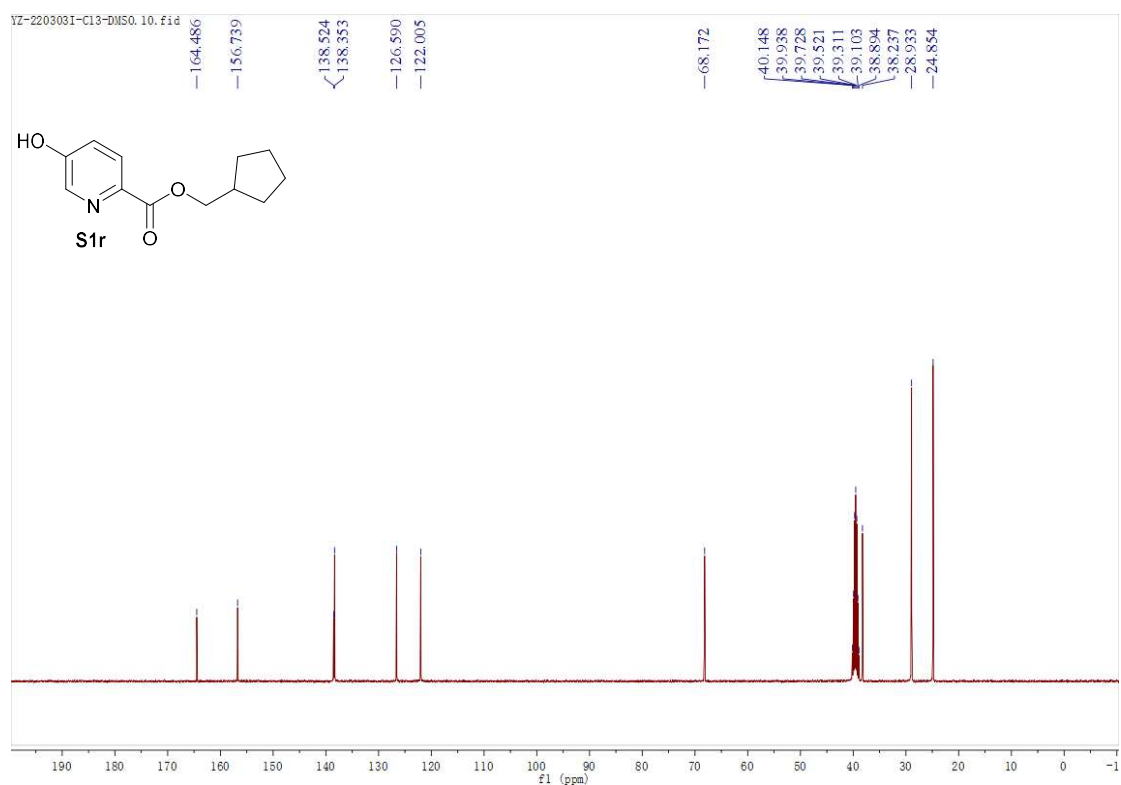

**<sup>13</sup>C-NMR Spectrum (100 MHz, DMSO-*d*<sub>6</sub>) of Compound S1r**

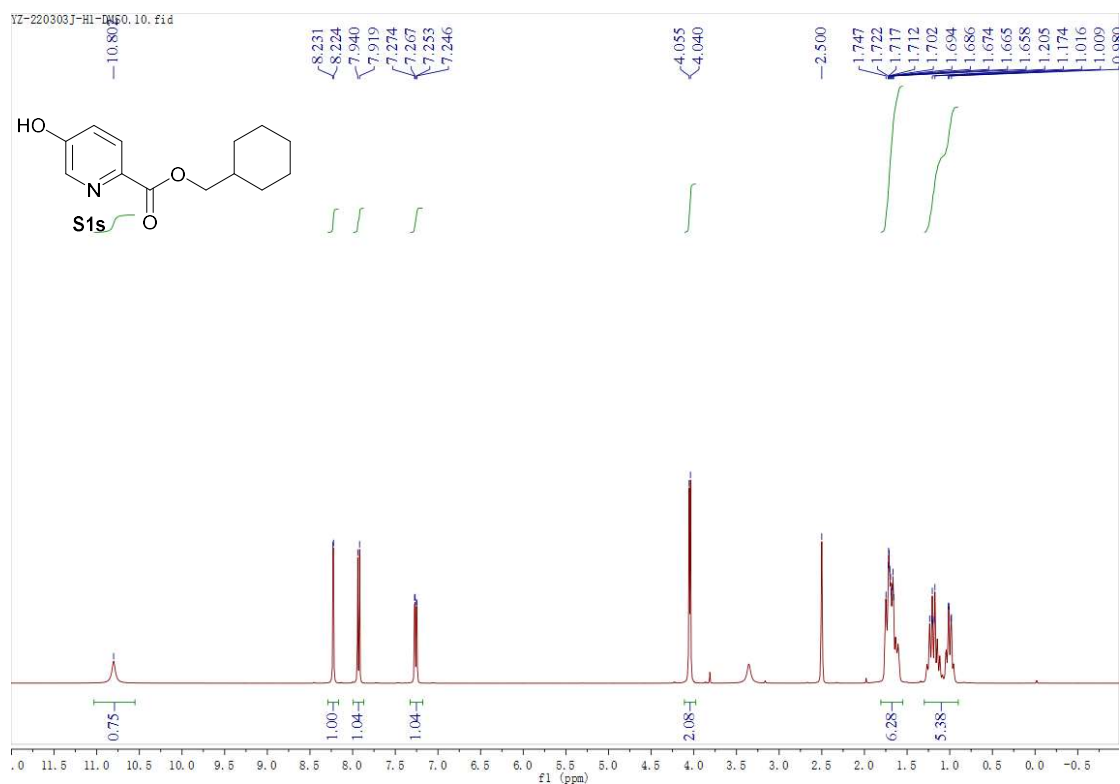

**<sup>1</sup>H-NMR Spectrum (400 MHz, DMSO-*d*<sub>6</sub>) of Compound S1s**

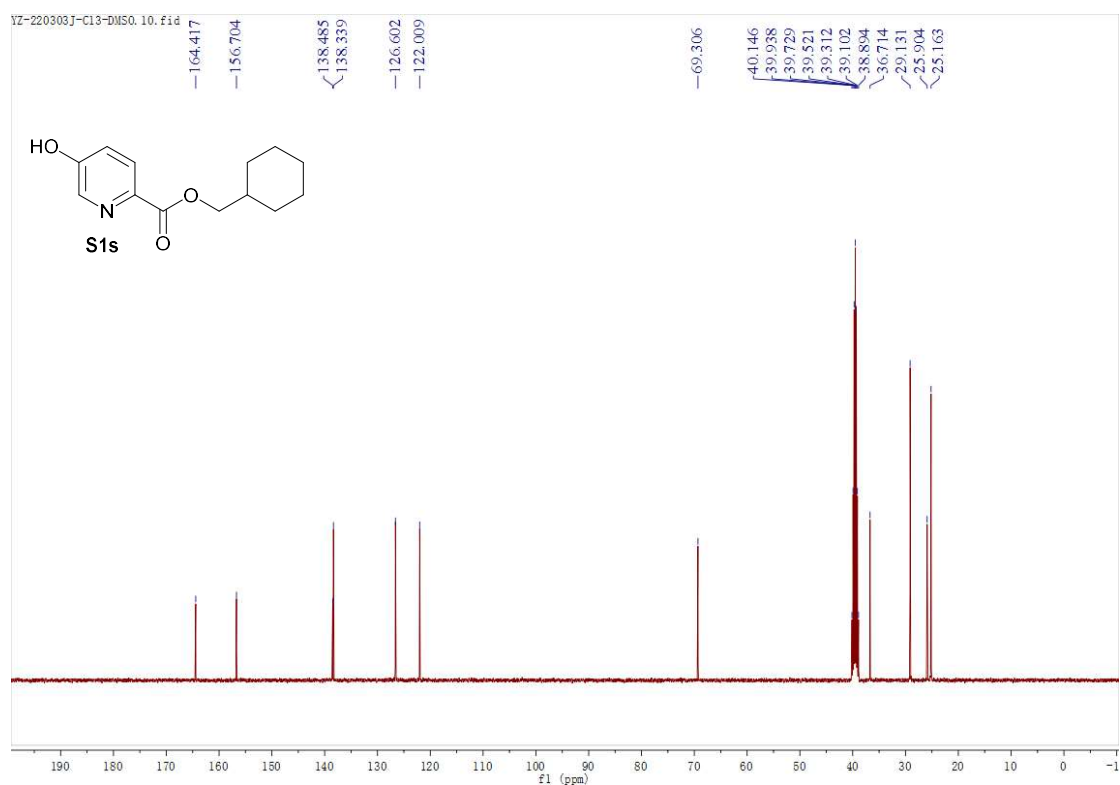

**<sup>13</sup>C-NMR Spectrum (100 MHz, DMSO-*d*<sub>6</sub>) of Compound S1s**



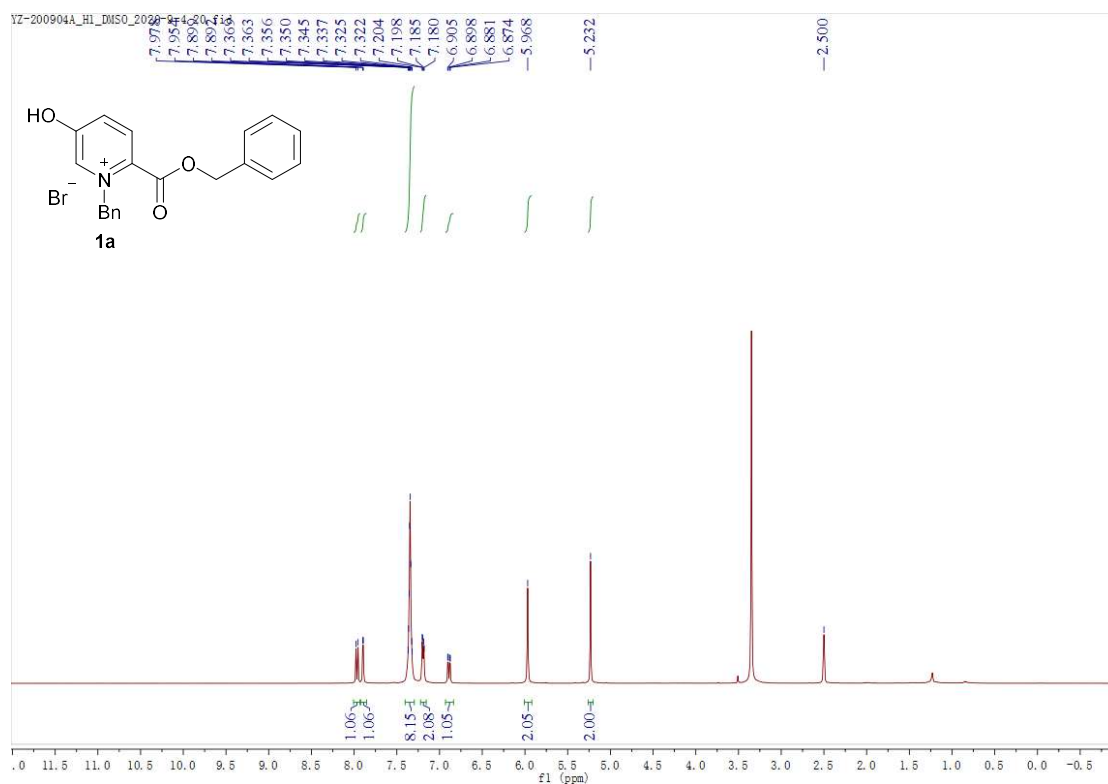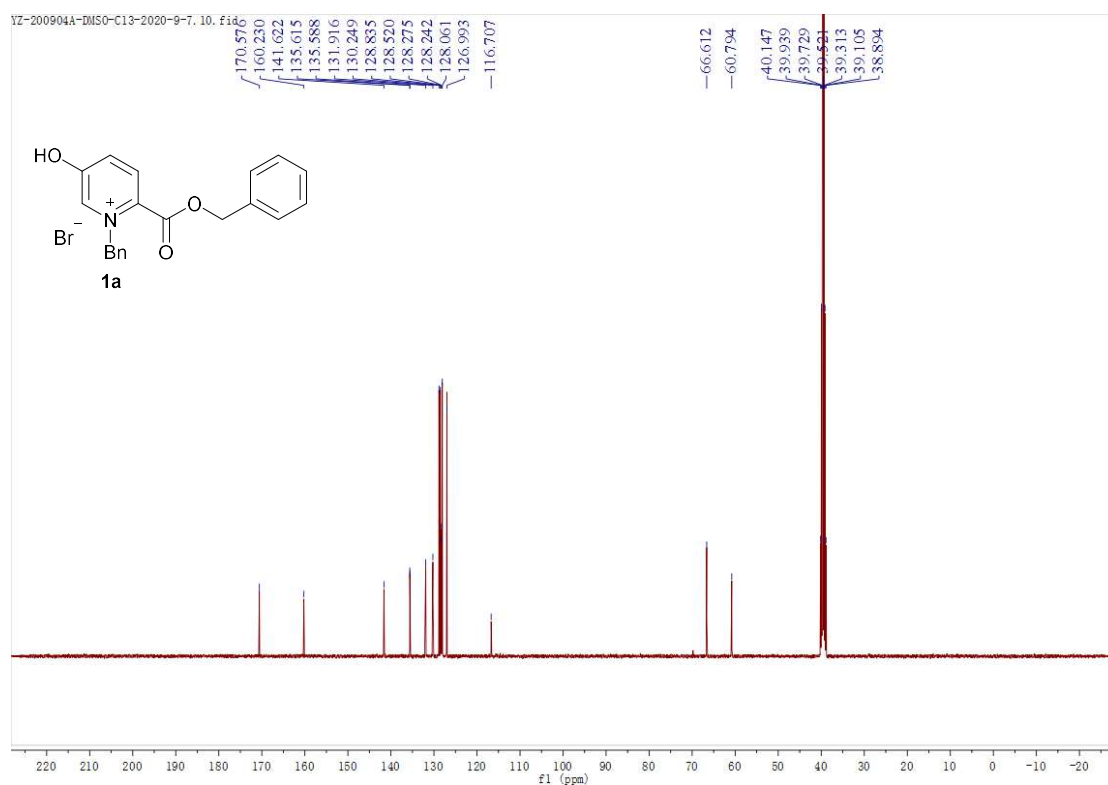

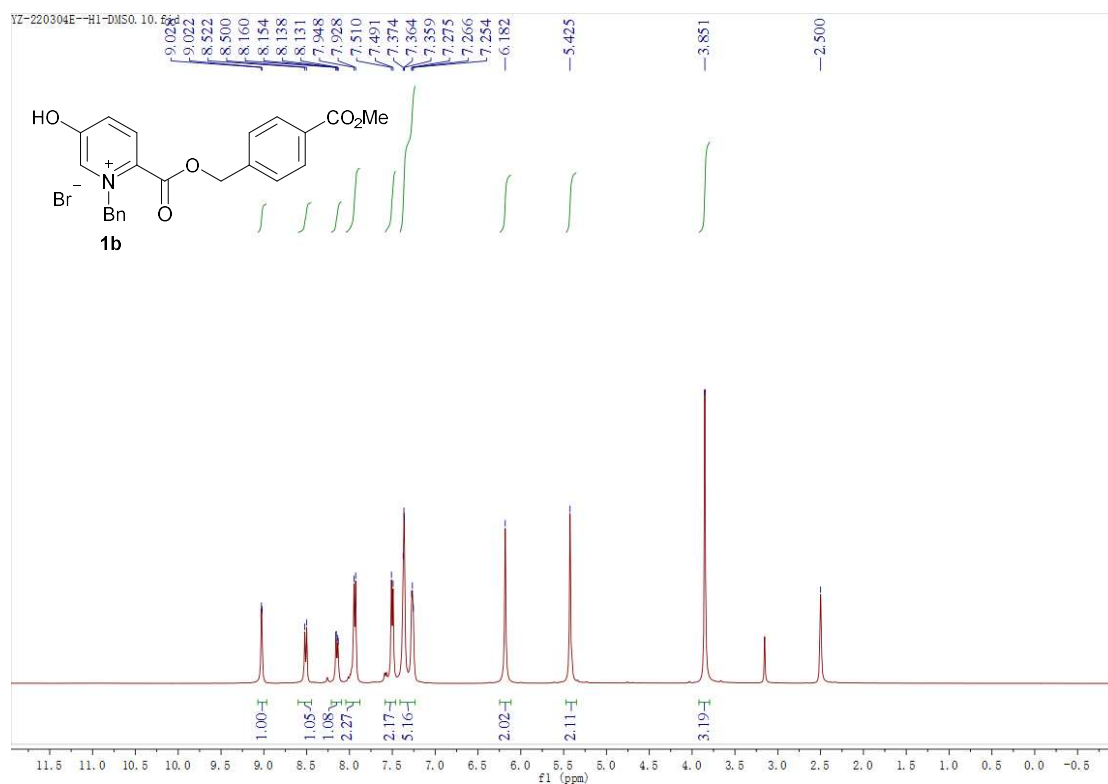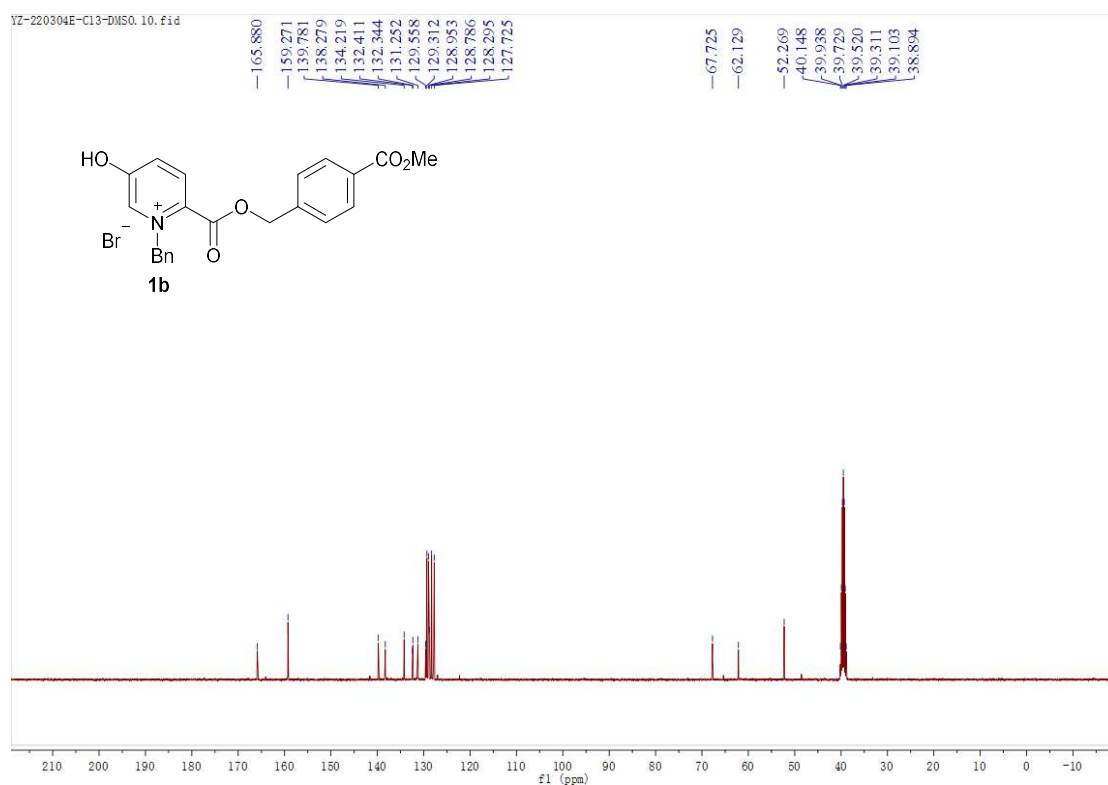

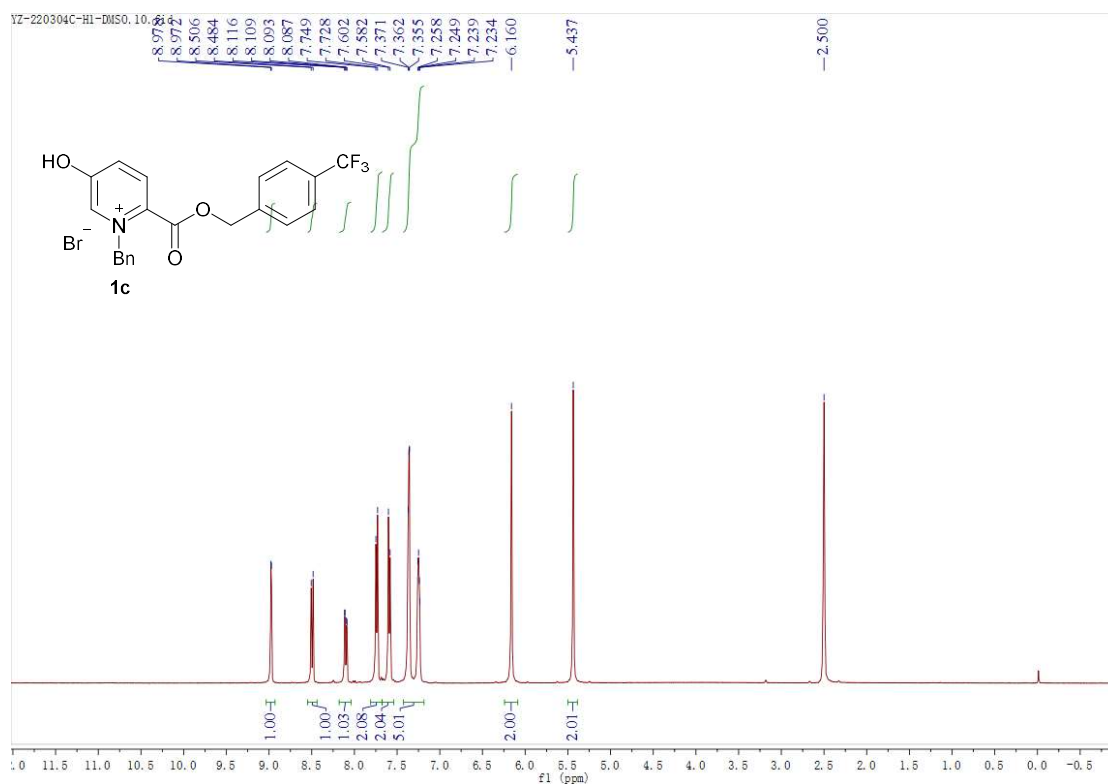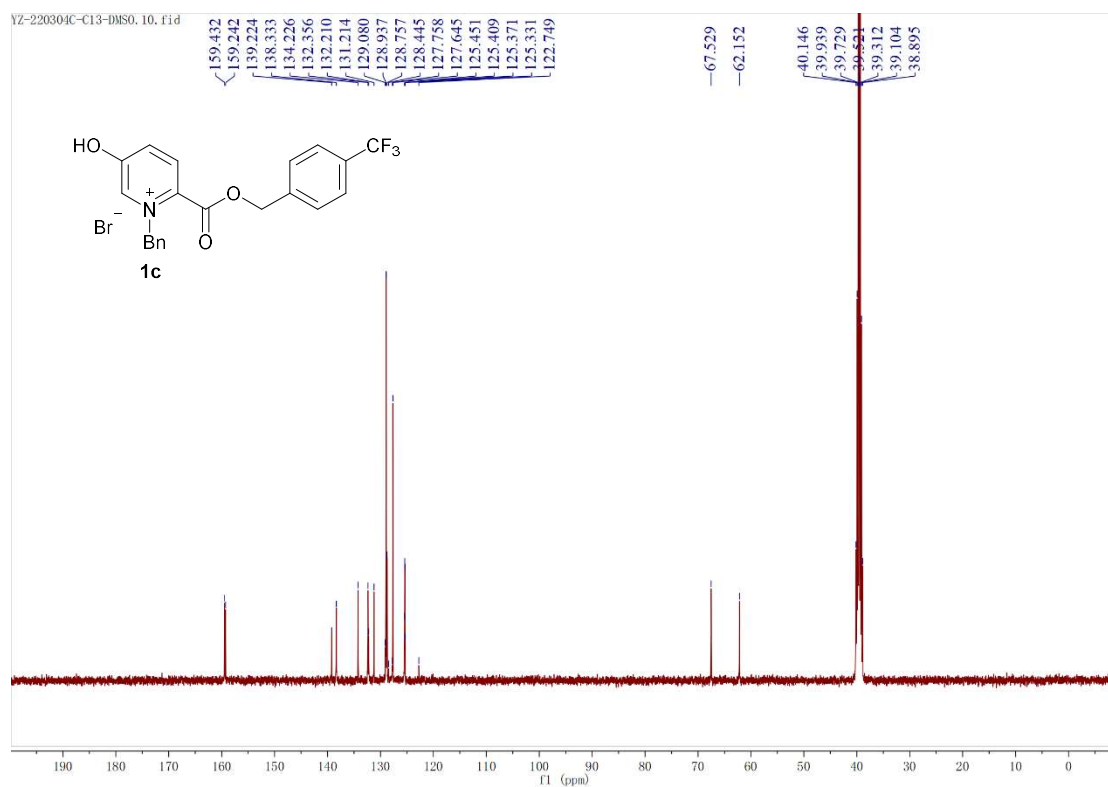

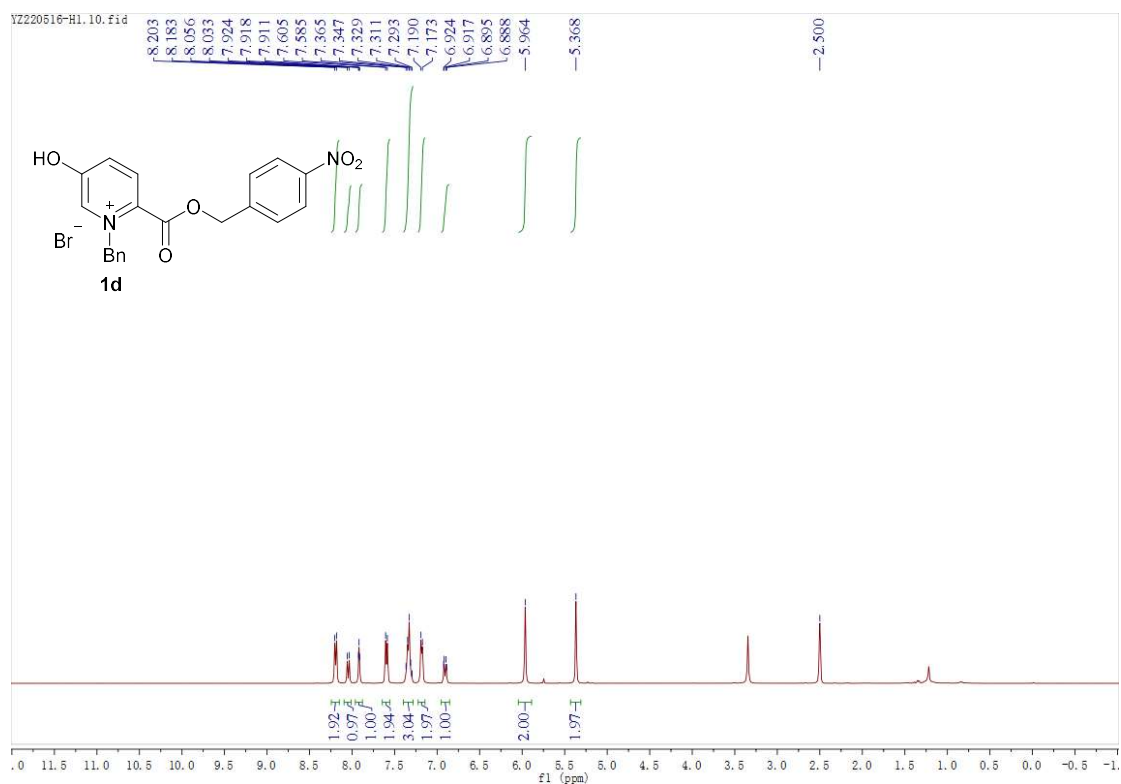

**<sup>1</sup>H-NMR Spectrum (400 MHz, DMSO-*d*<sub>6</sub>) of Compound 1d**

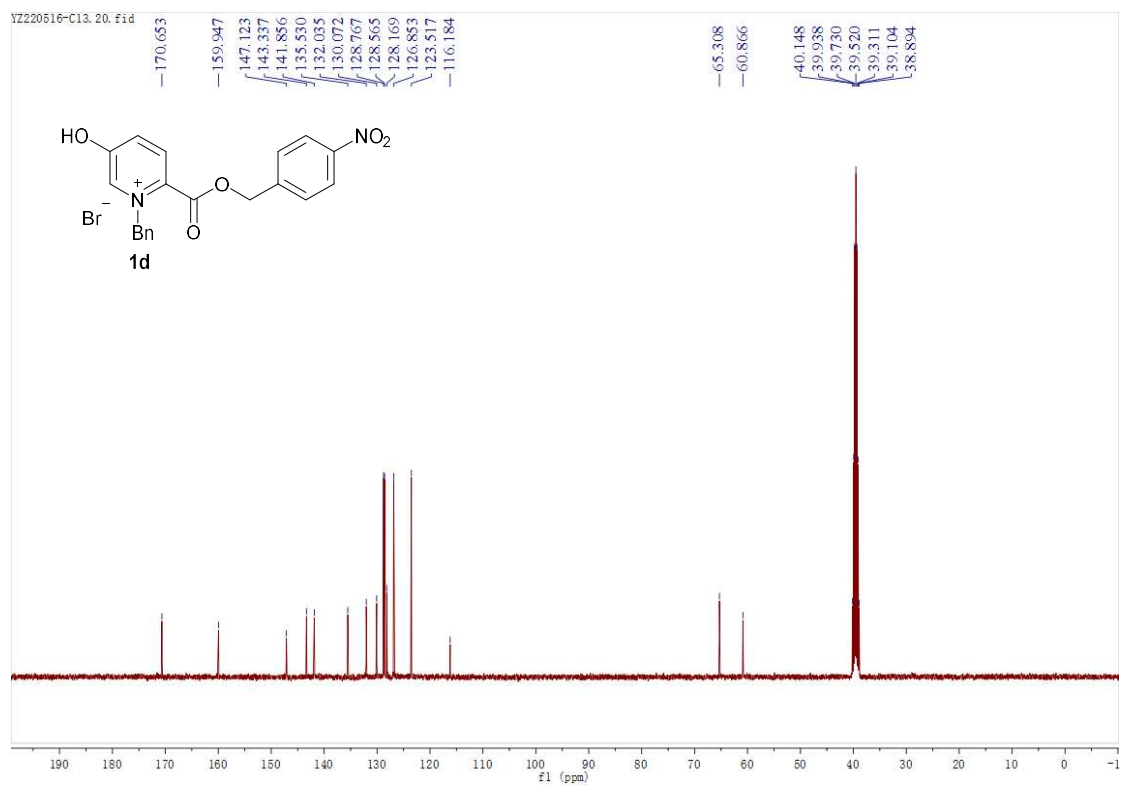

**<sup>13</sup>C-NMR Spectrum (100 MHz, DMSO-*d*<sub>6</sub>) of Compound 1d**

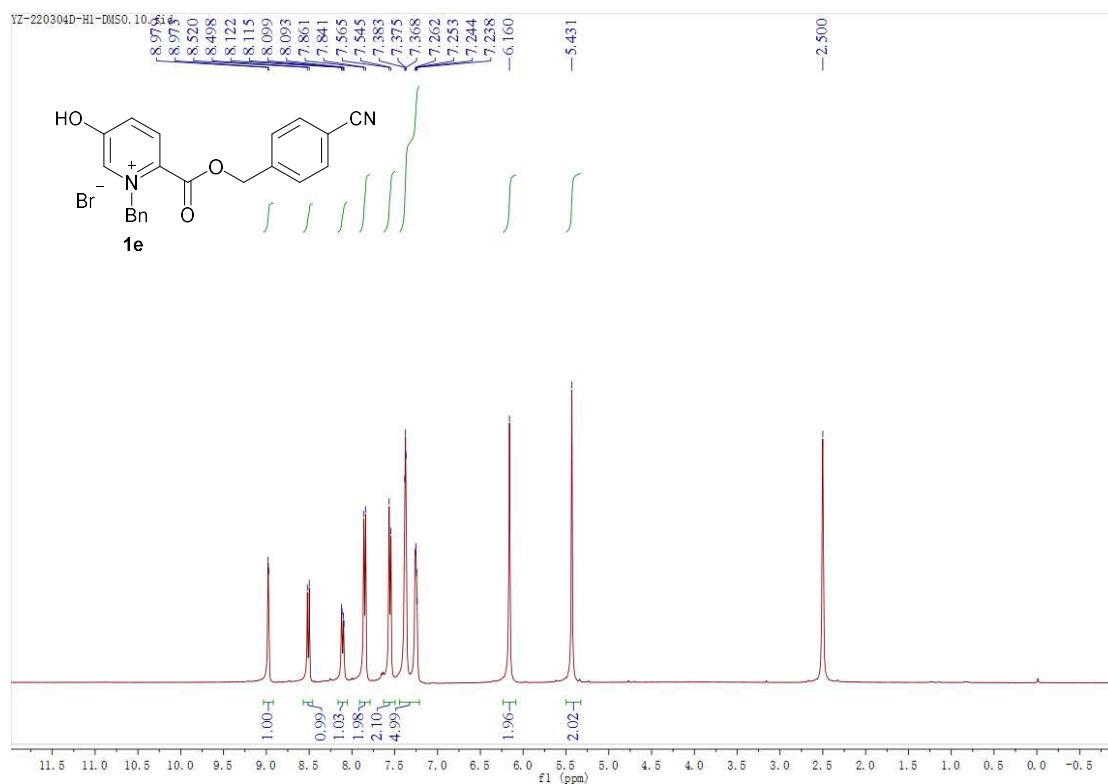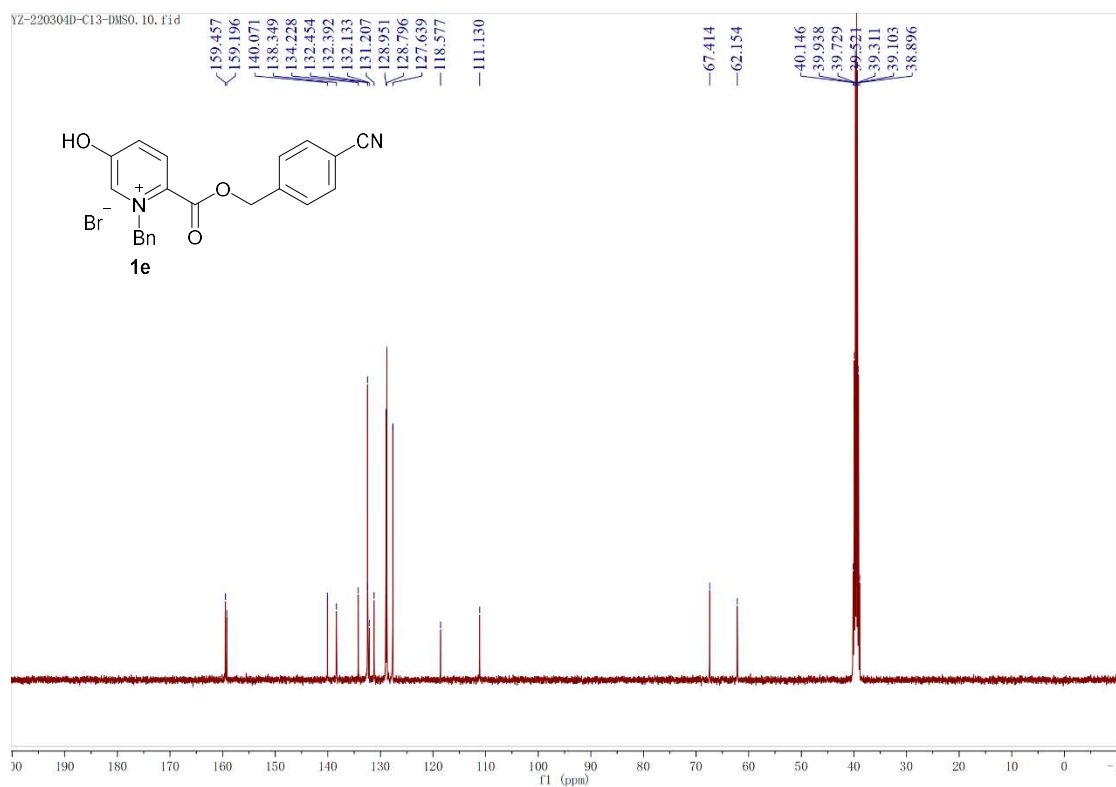

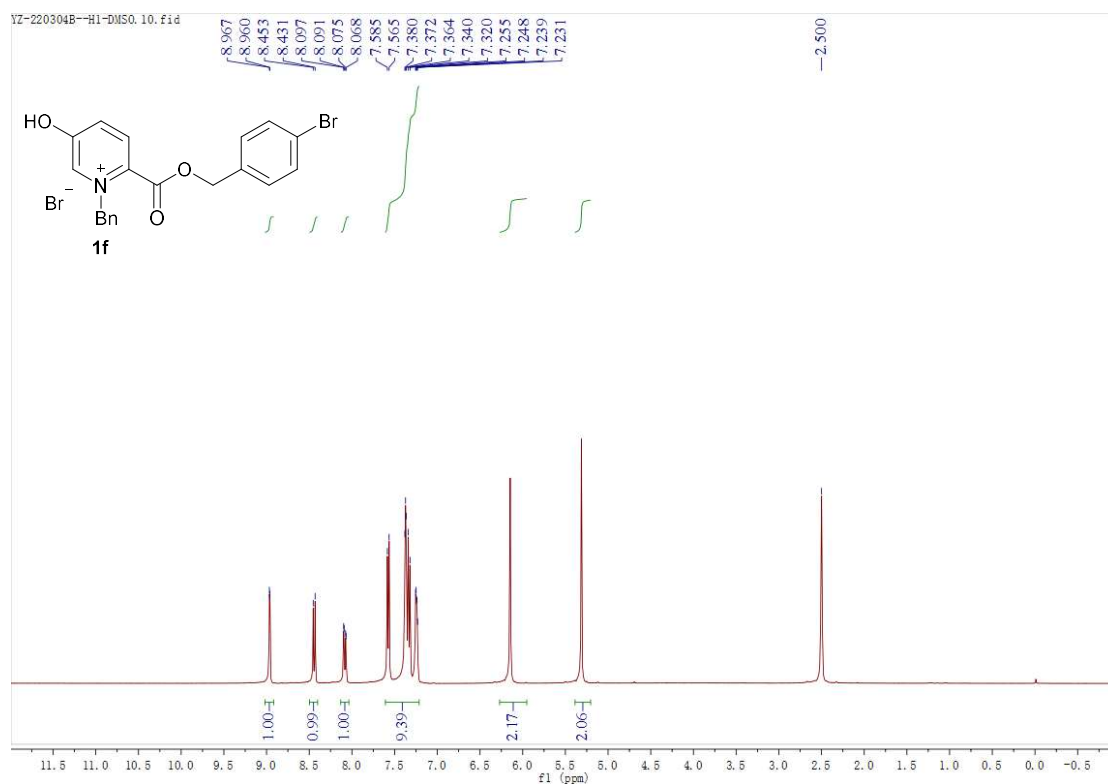

**<sup>1</sup>H-NMR Spectrum (400 MHz, DMSO-*d*<sub>6</sub>) of Compound 1f**

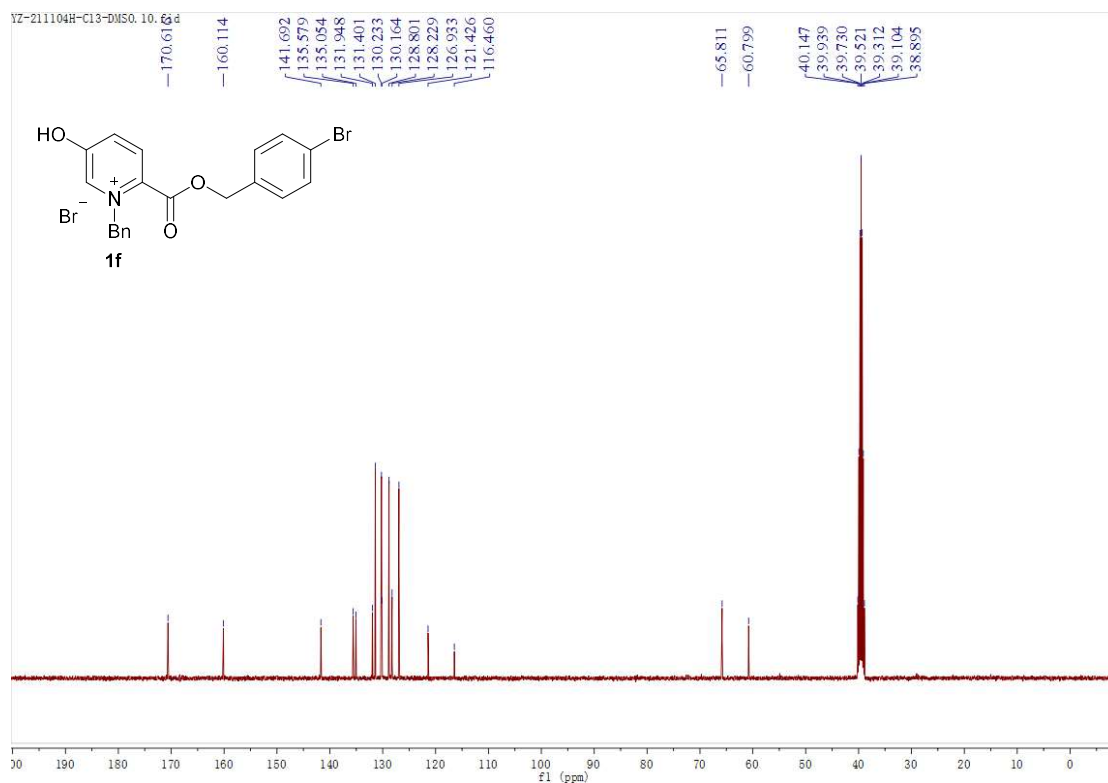

**<sup>13</sup>C-NMR Spectrum (100 MHz, DMSO-*d*<sub>6</sub>) of Compound 1f**

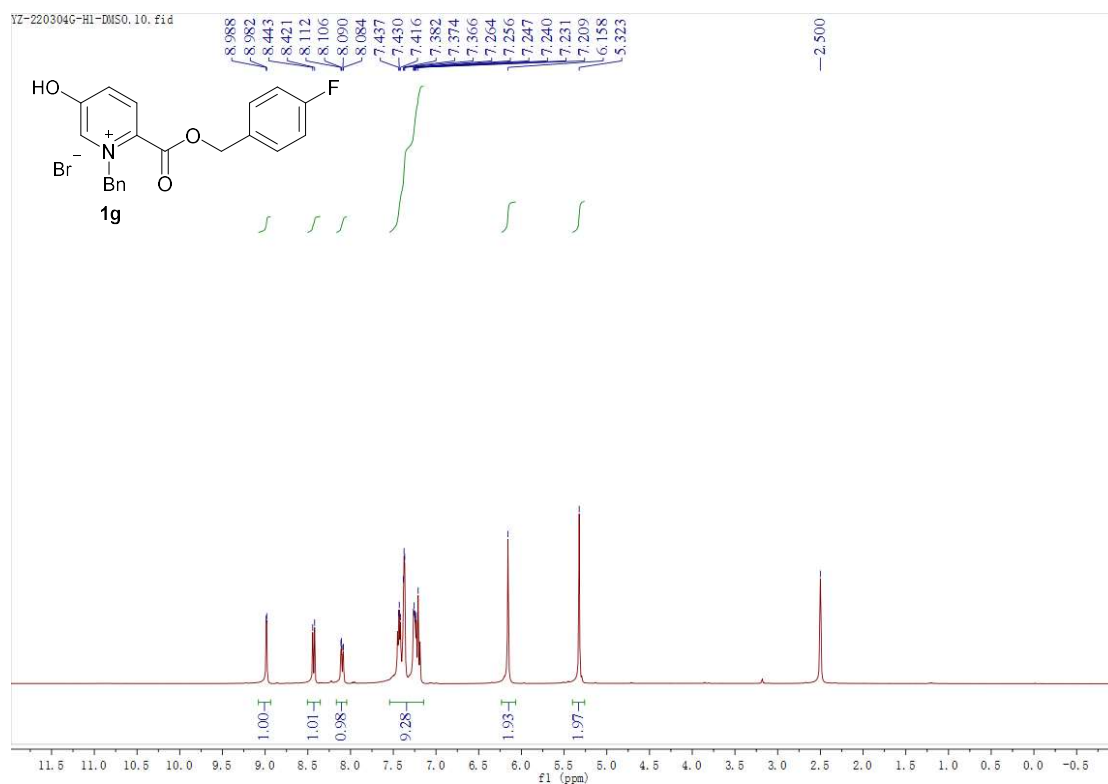

**<sup>1</sup>H-NMR Spectrum (400 MHz, DMSO-*d*<sub>6</sub>) of Compound **1g****

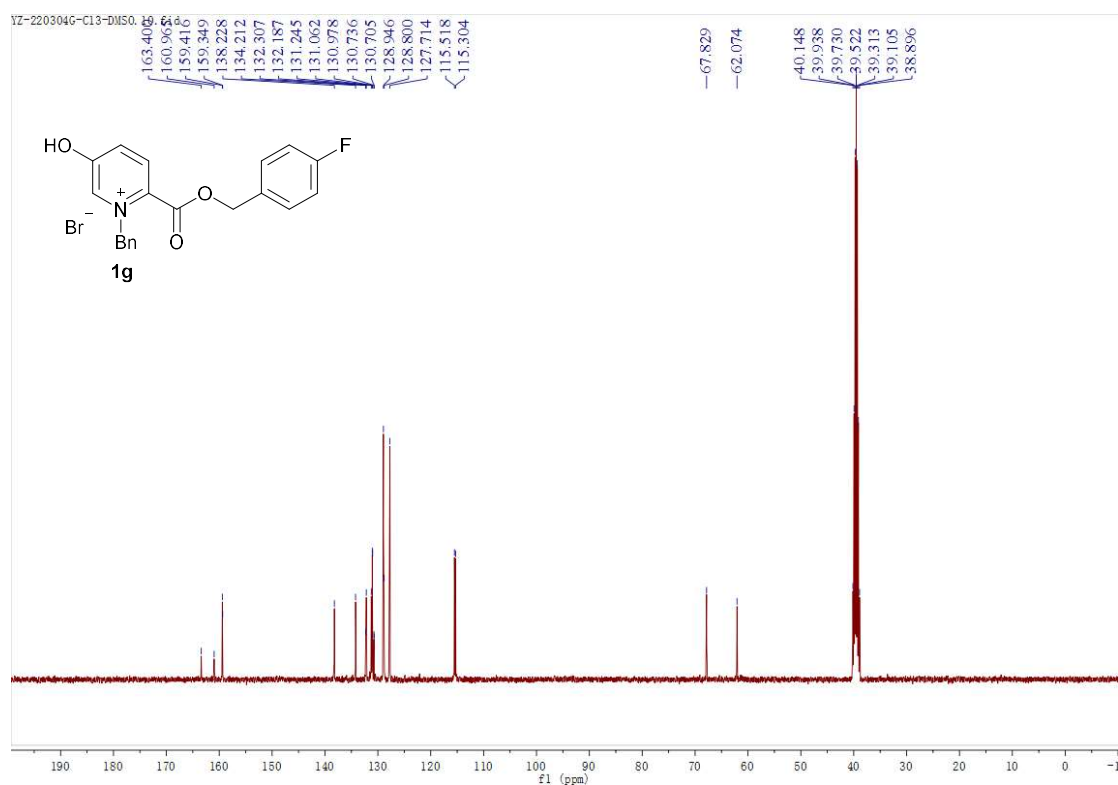

**<sup>13</sup>C-NMR Spectrum (100 MHz, DMSO-*d*<sub>6</sub>) of Compound **1g****

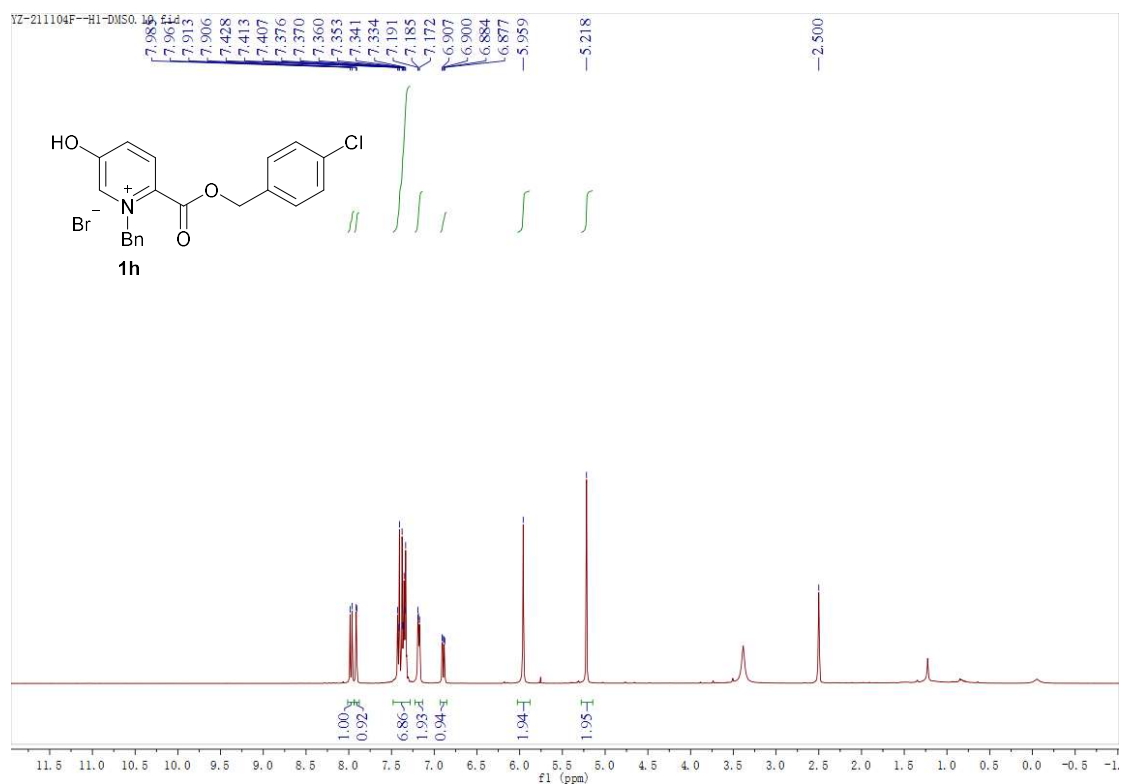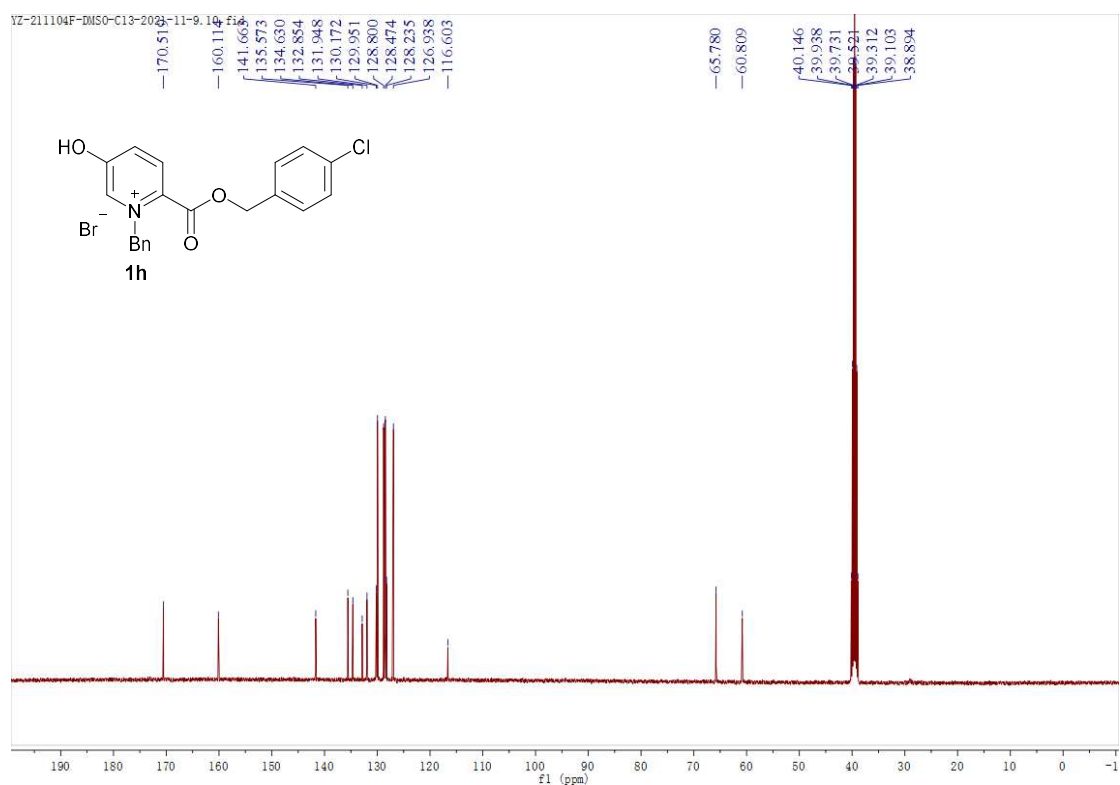



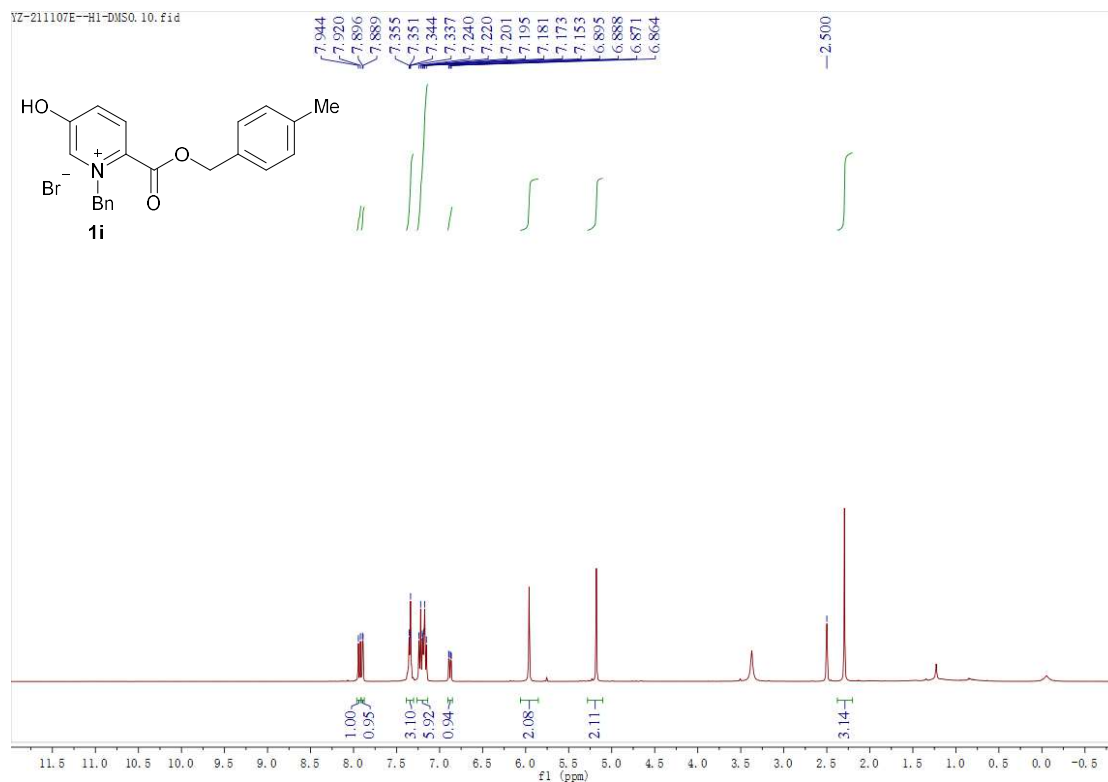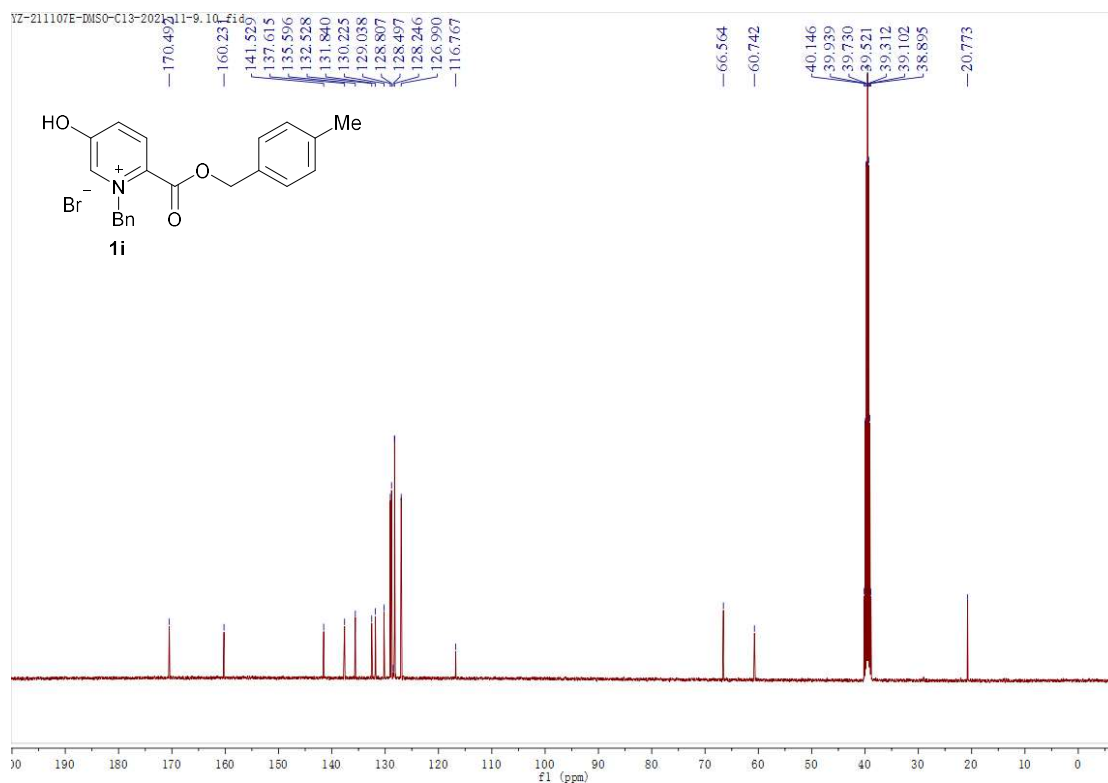

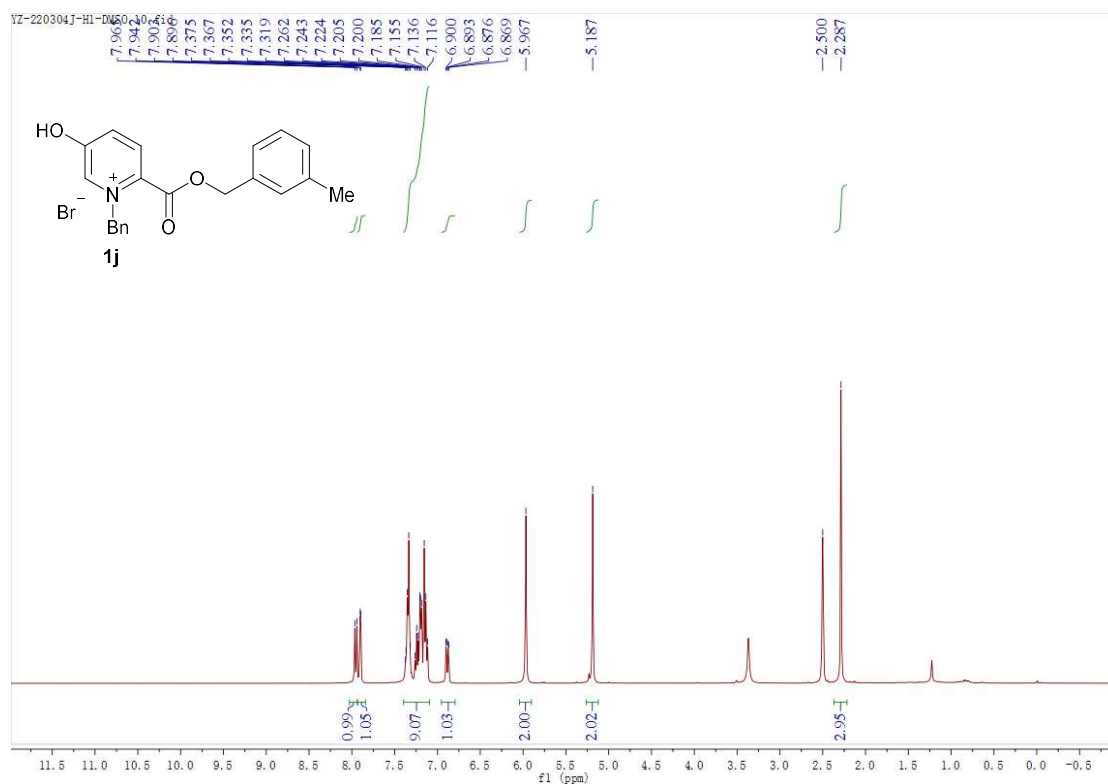

<sup>1</sup>H-NMR Spectrum (400 MHz, DMSO- $d_6$ ) of Compound 1j

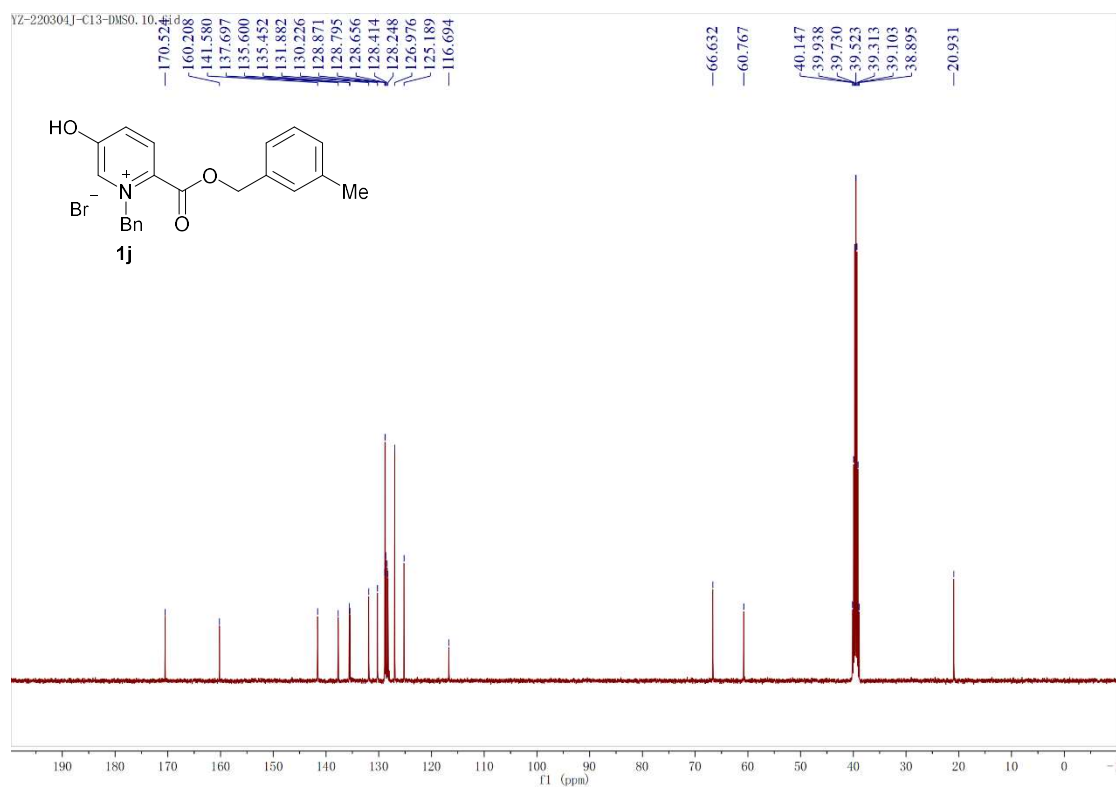

<sup>13</sup>C-NMR Spectrum (100 MHz, DMSO- $d_6$ ) of Compound 1j

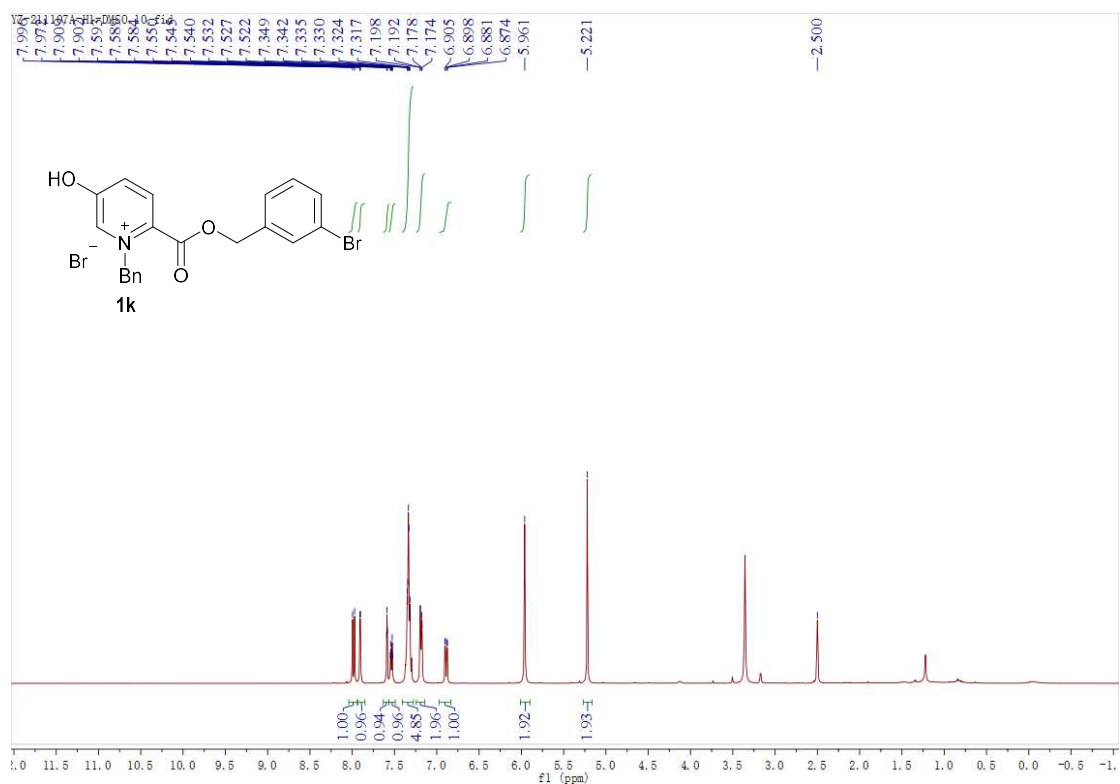

**<sup>1</sup>H-NMR Spectrum (400 MHz, DMSO-*d*<sub>6</sub>) of Compound 1k**

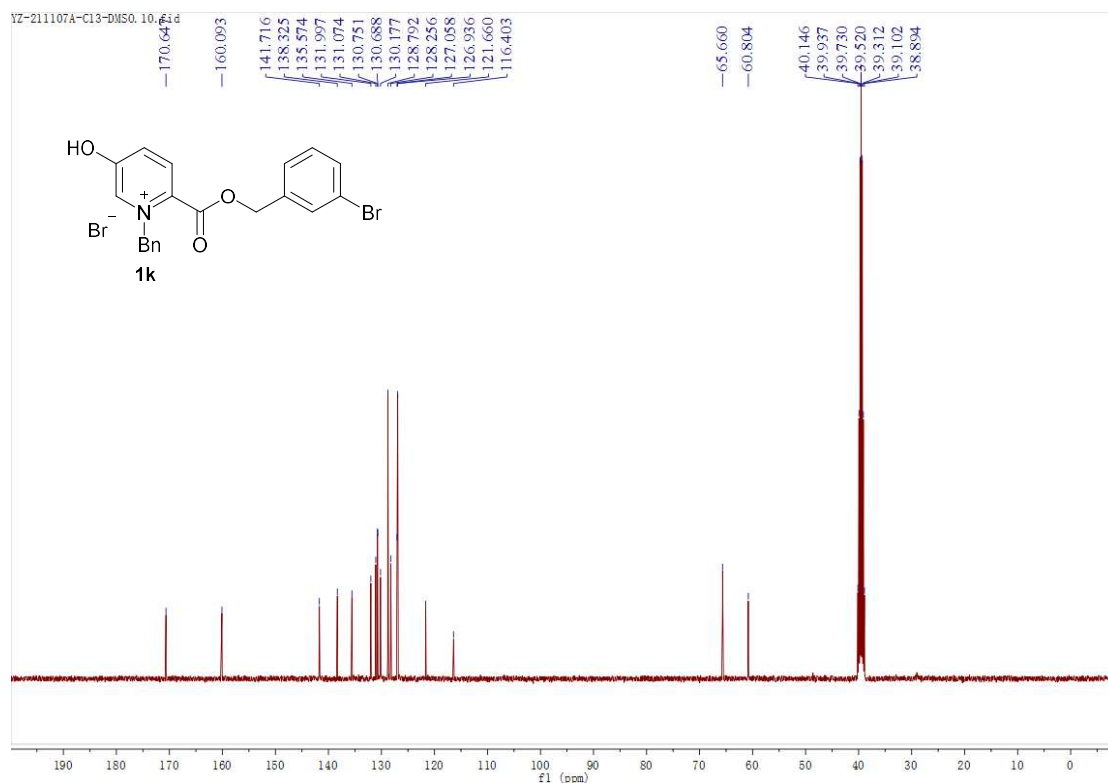

**<sup>13</sup>C-NMR Spectrum (100 MHz, DMSO-*d*<sub>6</sub>) of Compound 1k**

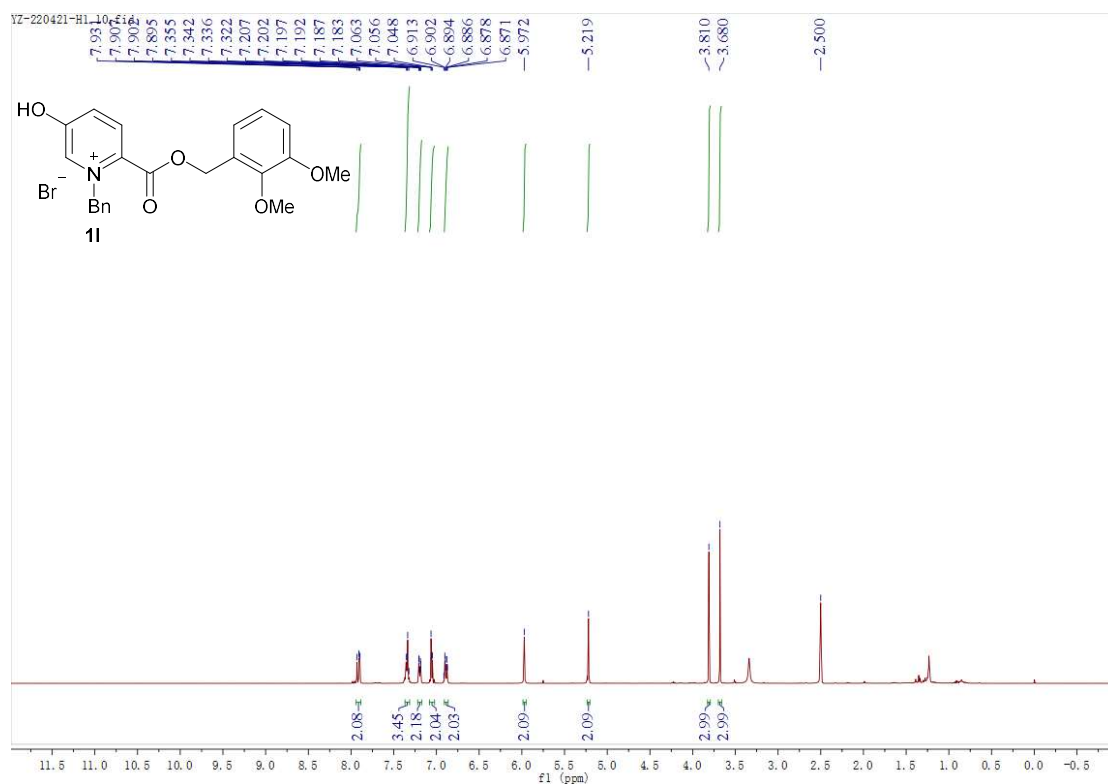

<sup>1</sup>H-NMR Spectrum (400 MHz, DMSO-*d*<sub>6</sub>) of Compound 11

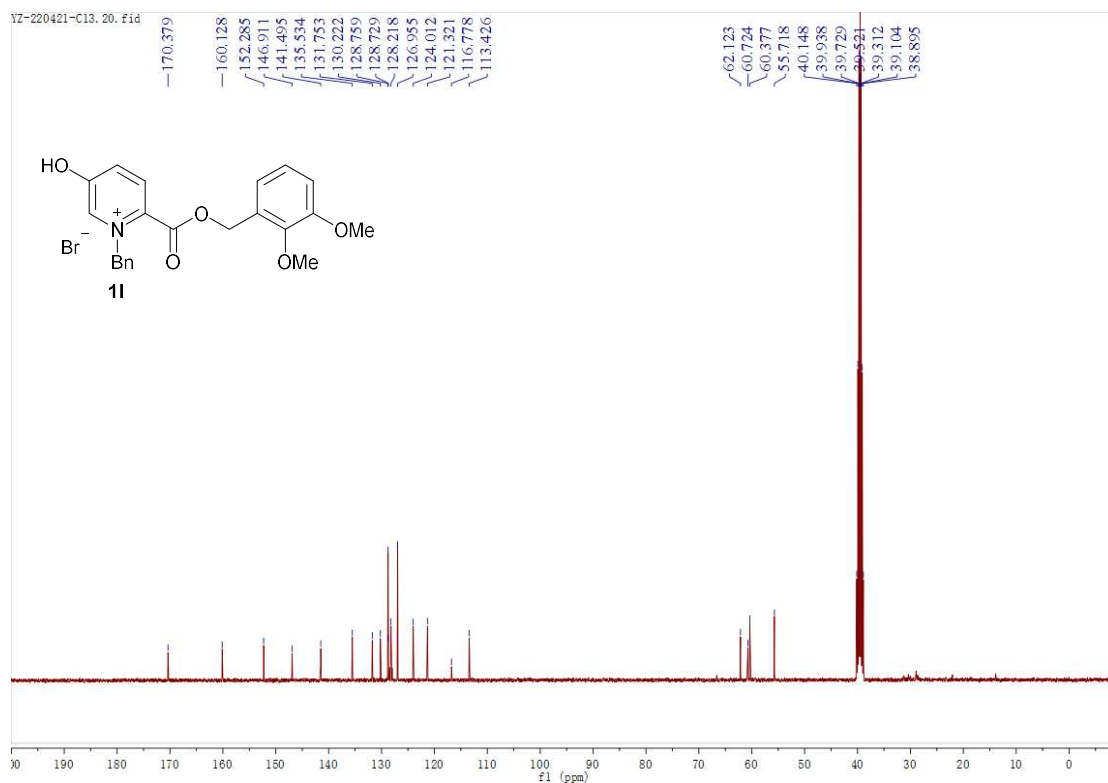

<sup>13</sup>C-NMR Spectrum (100 MHz, DMSO-*d*<sub>6</sub>) of Compound 11

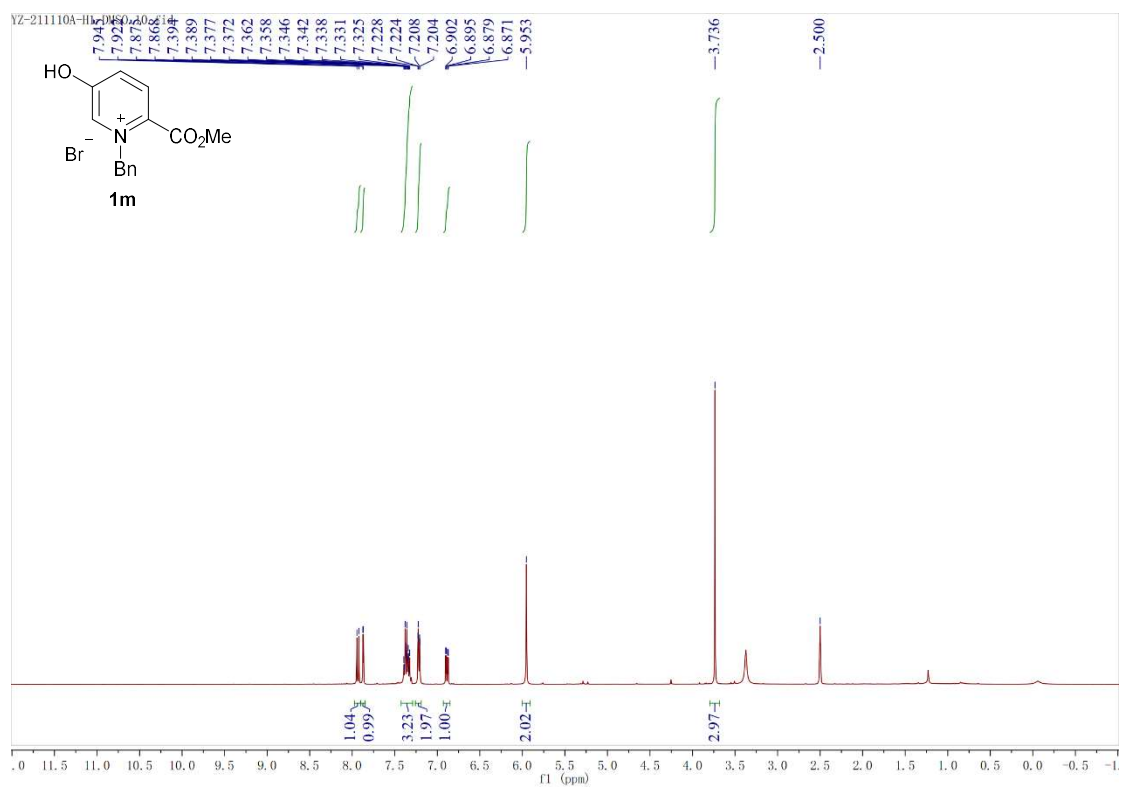

<sup>1</sup>H-NMR Spectrum (400 MHz, DMSO-*d*<sub>6</sub>) of Compound 1m

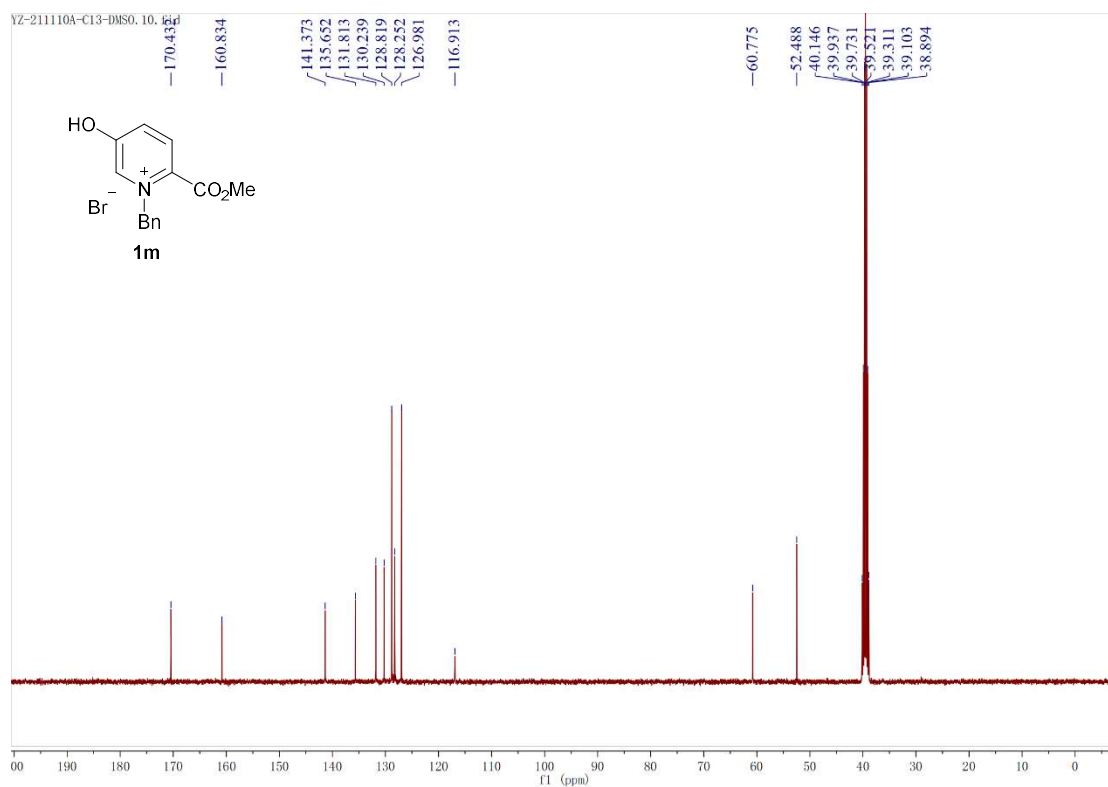

<sup>13</sup>C-NMR Spectrum (100 MHz, DMSO-*d*<sub>6</sub>) of Compound 1m

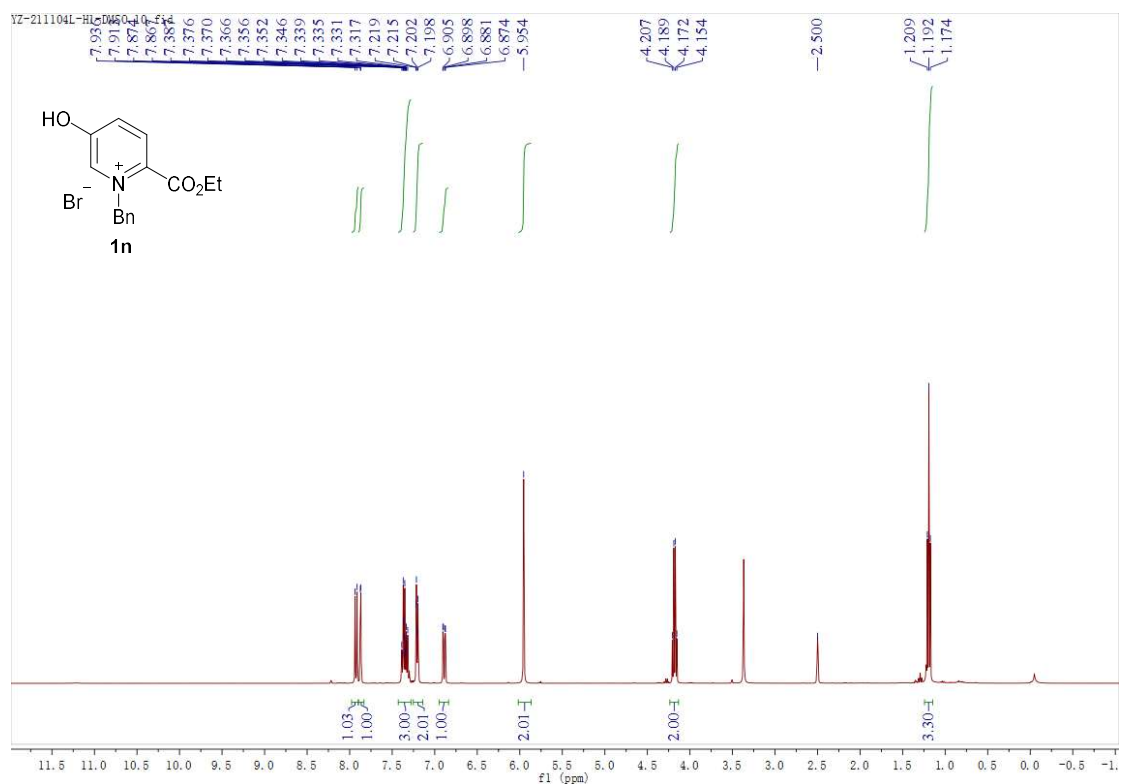

<sup>1</sup>H-NMR Spectrum (400 MHz, DMSO-*d*<sub>6</sub>) of Compound 1n

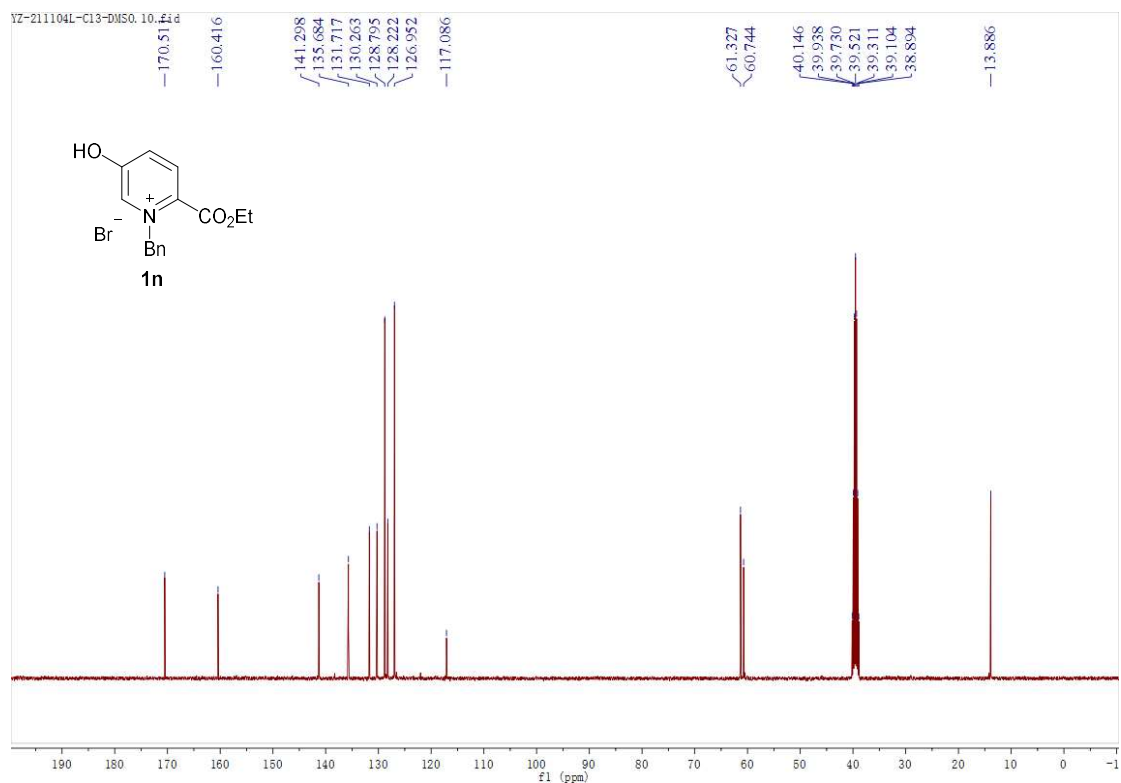

<sup>13</sup>C-NMR Spectrum (100 MHz, DMSO-*d*<sub>6</sub>) of Compound 1n

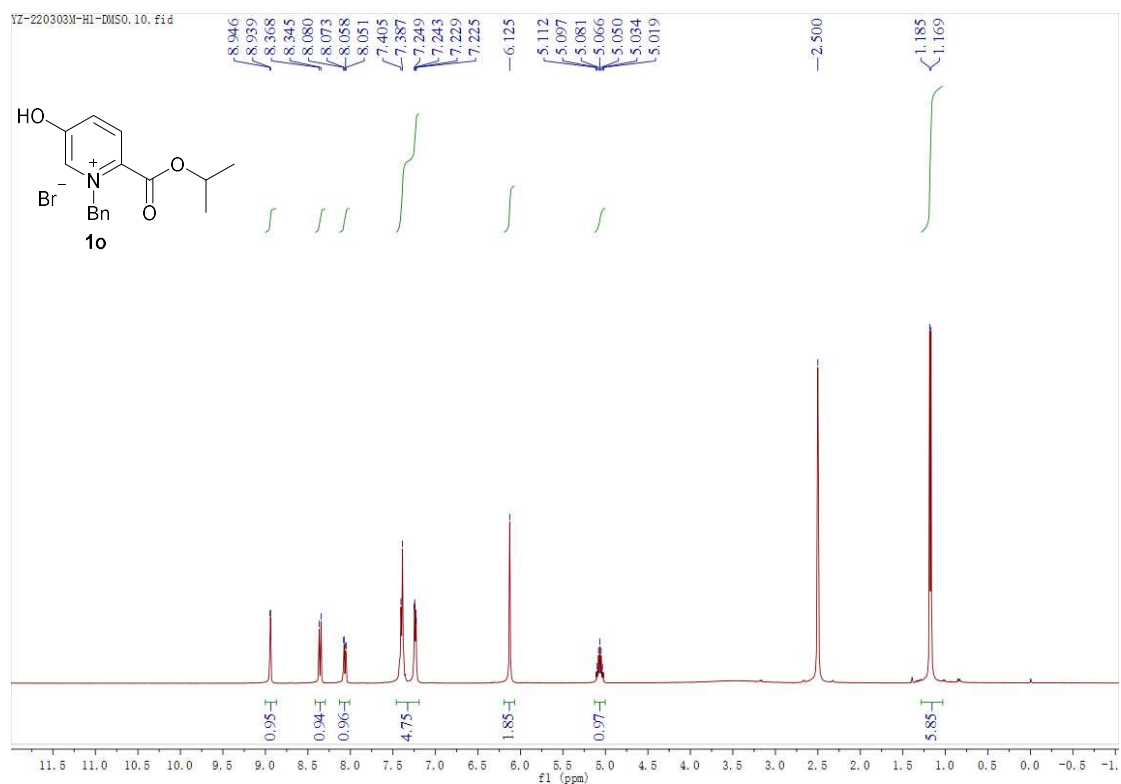

**<sup>1</sup>H-NMR Spectrum (400 MHz, DMSO-*d*<sub>6</sub>) of Compound 1o**

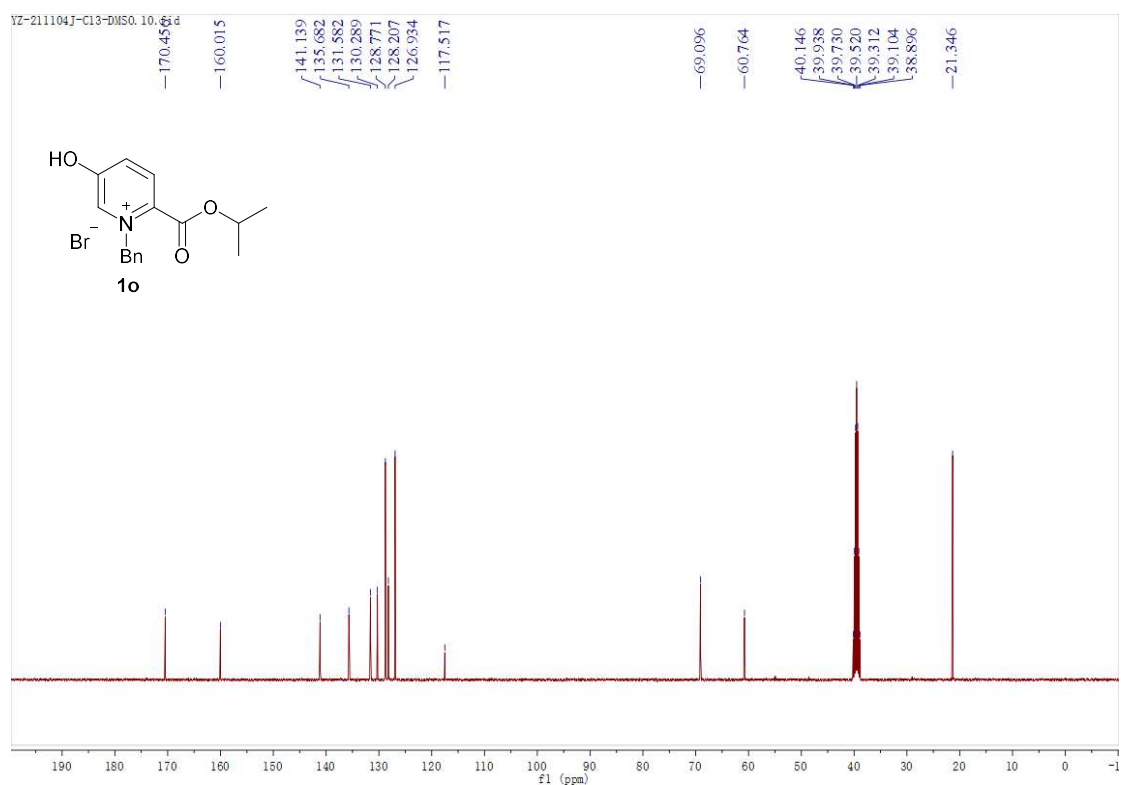

**<sup>13</sup>C-NMR Spectrum (100 MHz, DMSO-*d*<sub>6</sub>) of Compound 1o**

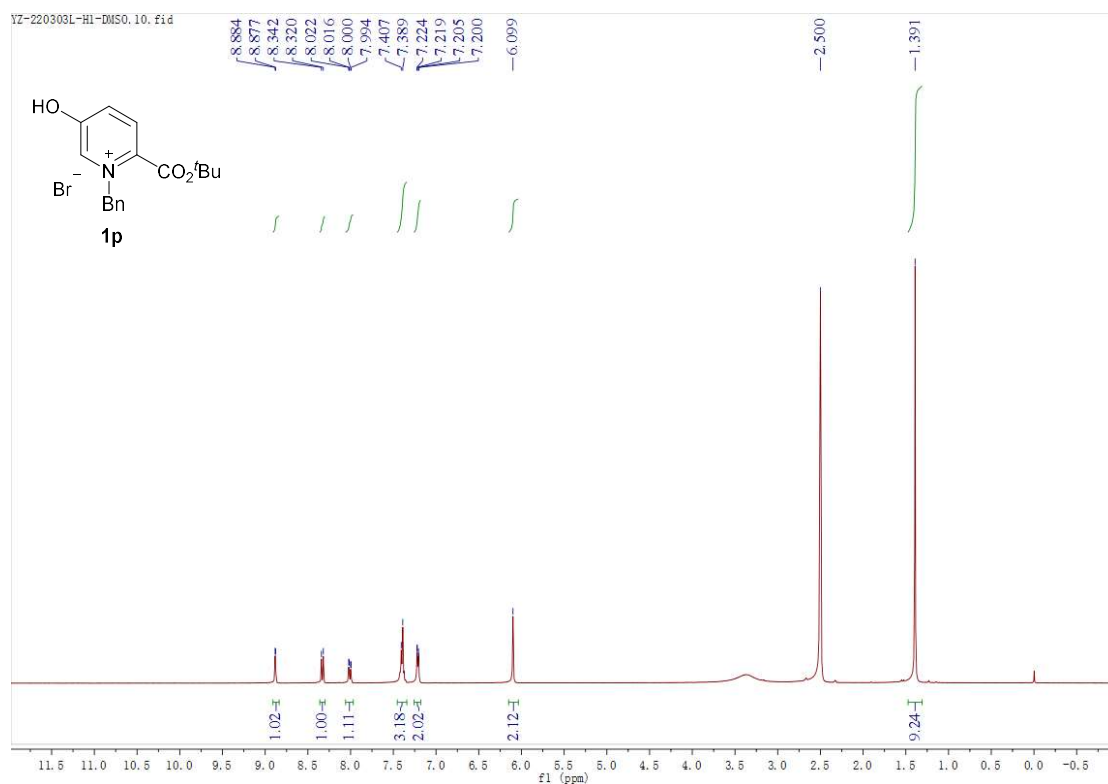

<sup>1</sup>H-NMR Spectrum (400 MHz, DMSO-*d*<sub>6</sub>) of Compound 1p

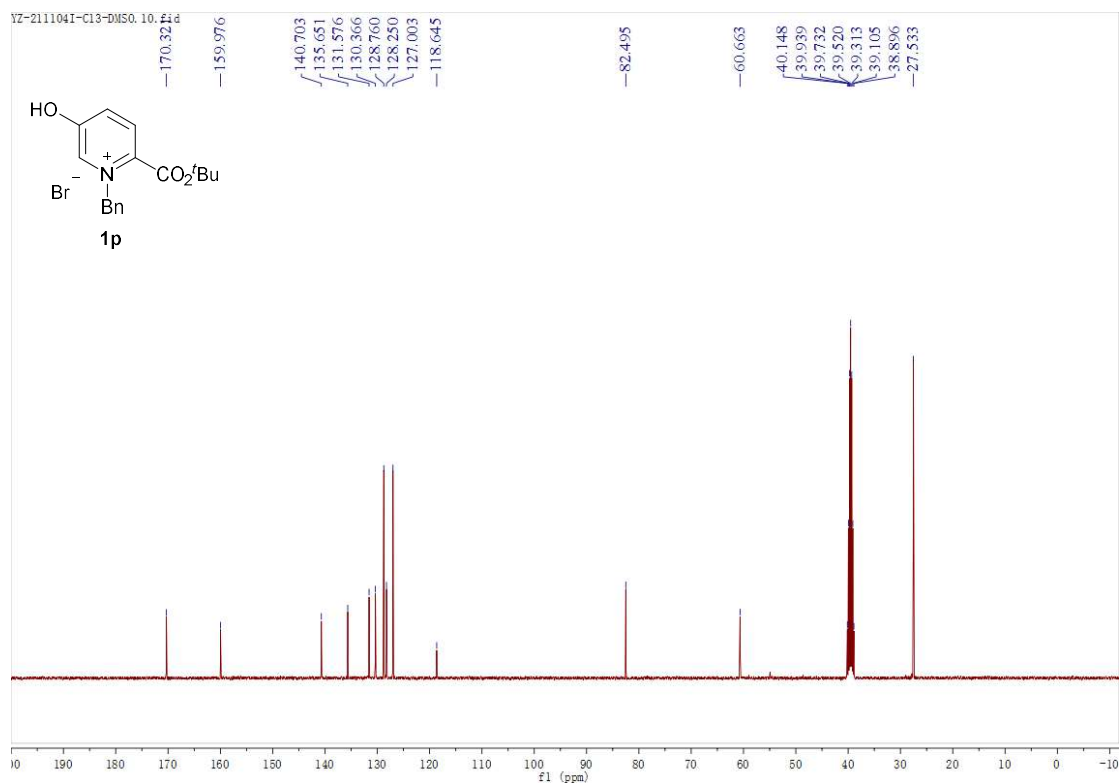

<sup>13</sup>C-NMR Spectrum (100 MHz, DMSO-*d*<sub>6</sub>) of Compound 1p



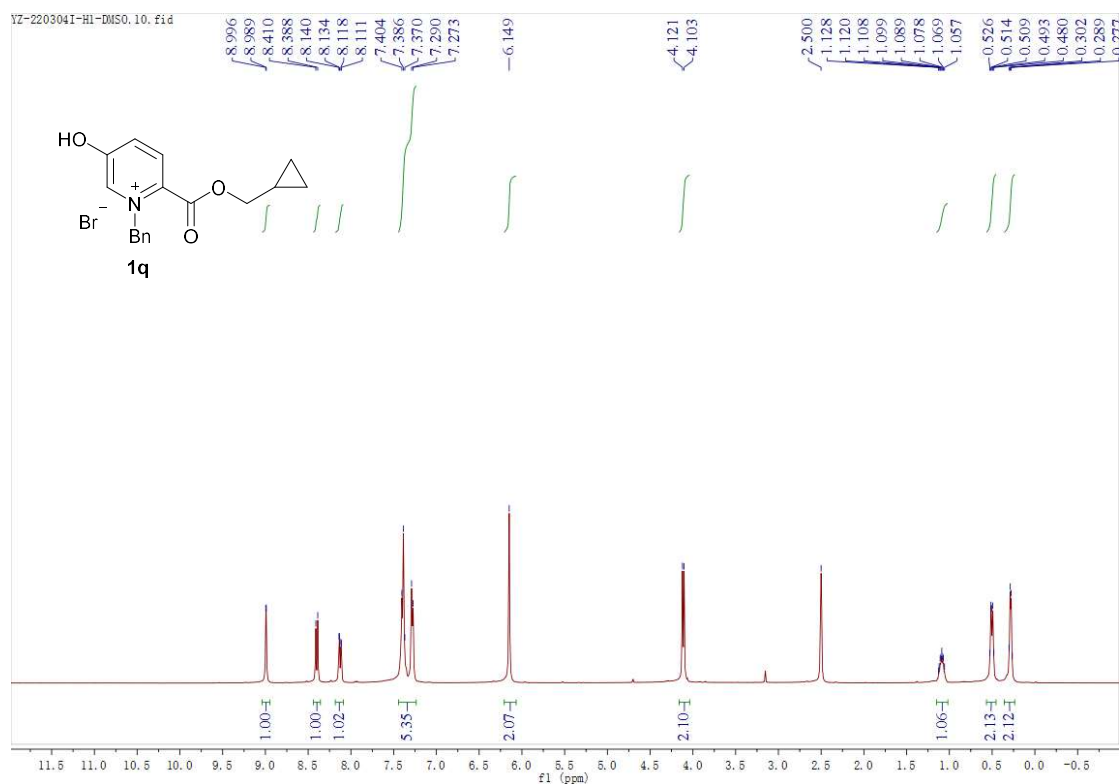

**<sup>1</sup>H-NMR Spectrum (400 MHz, DMSO-*d*<sub>6</sub>) of Compound 1q**

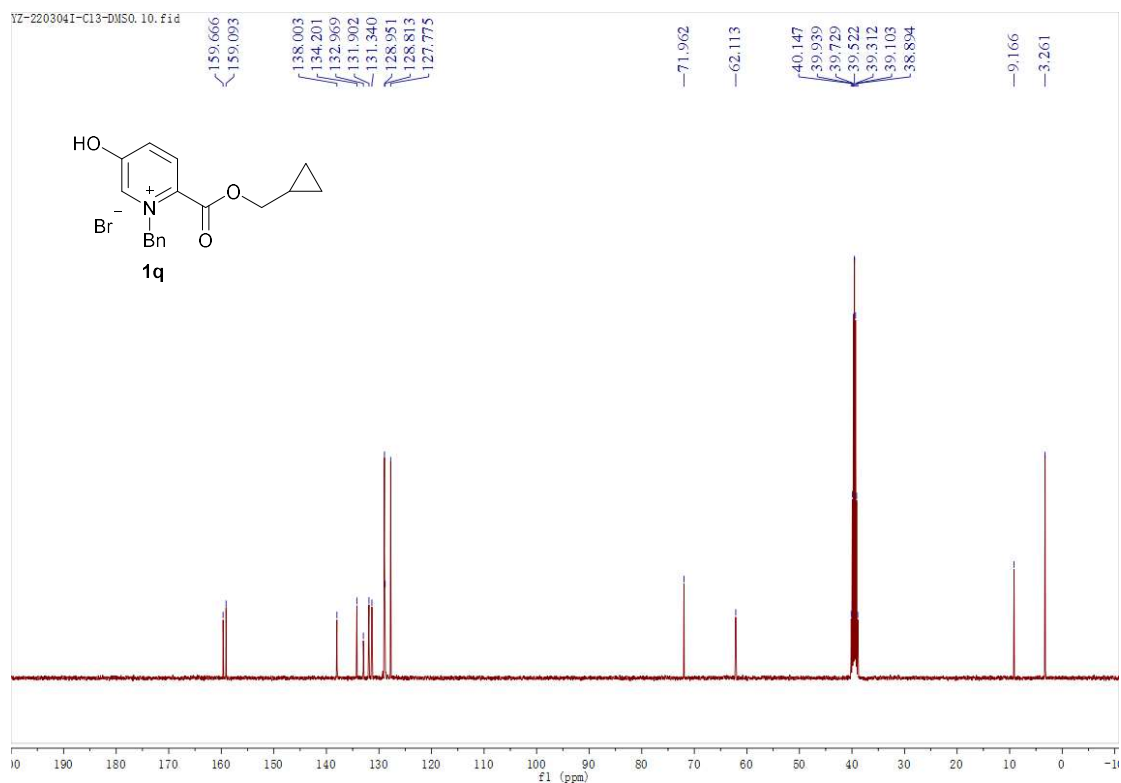

**<sup>13</sup>C-NMR Spectrum (100 MHz, DMSO-*d*<sub>6</sub>) of Compound 1q**

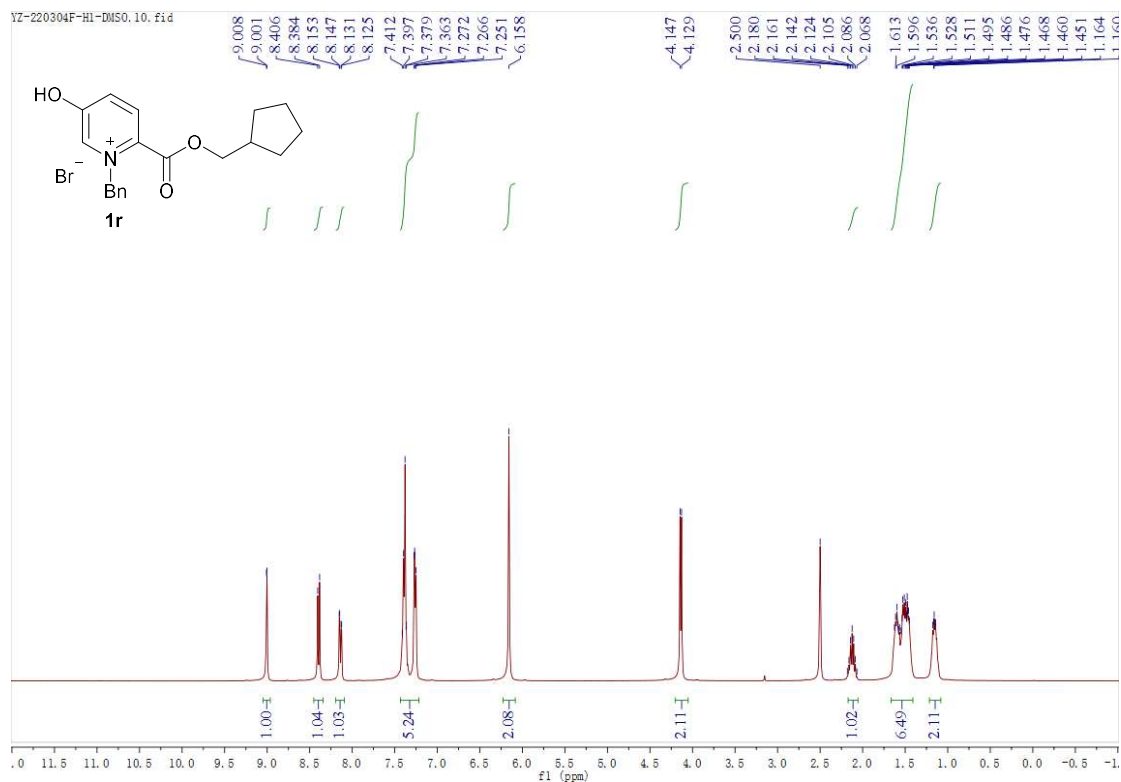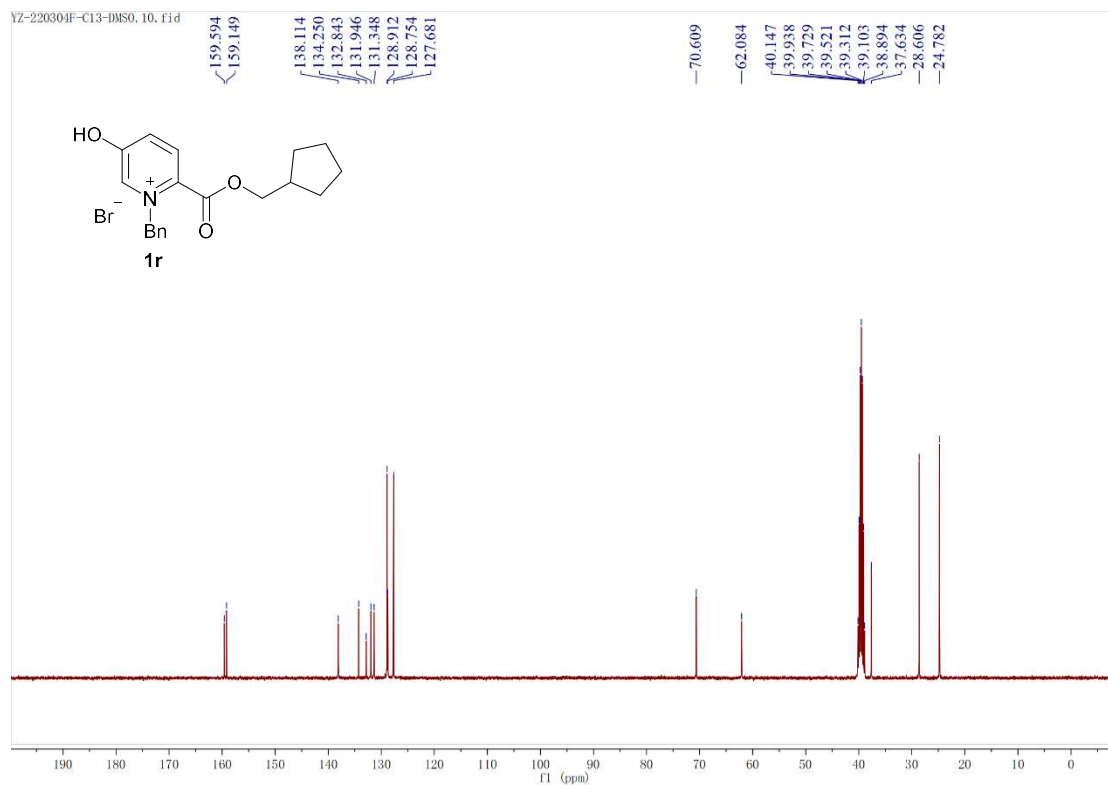

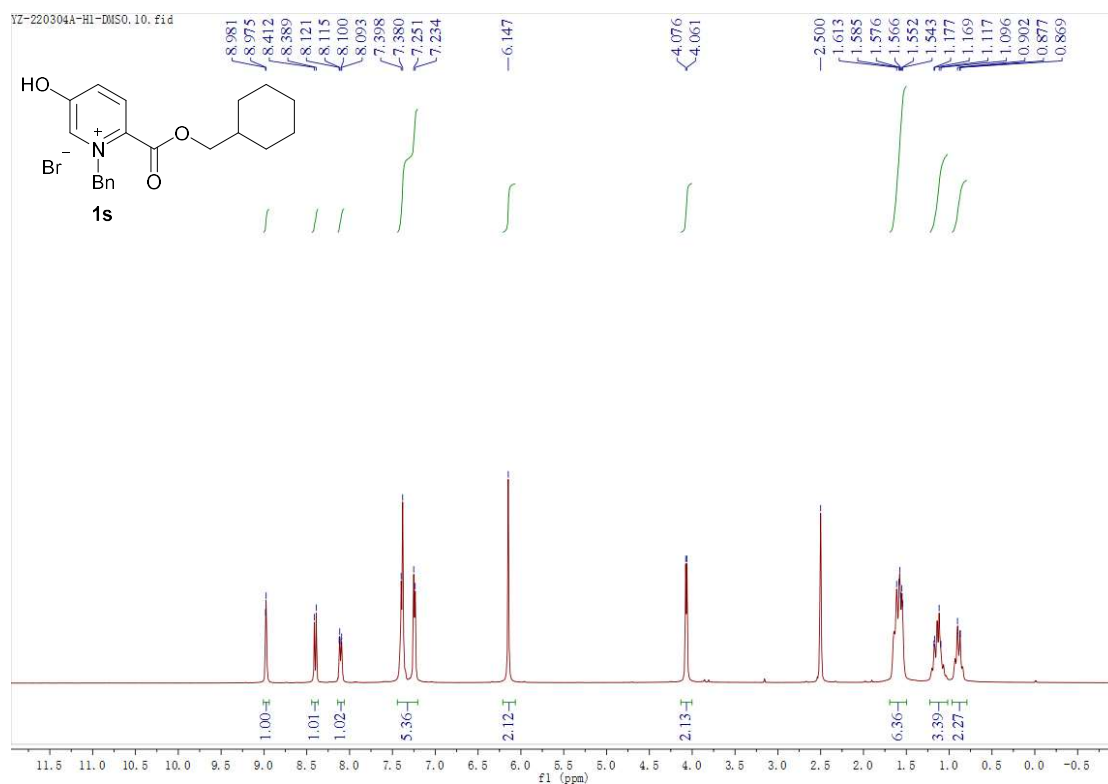

**<sup>1</sup>H-NMR Spectrum (400 MHz, DMSO-*d*<sub>6</sub>) of Compound 1s**

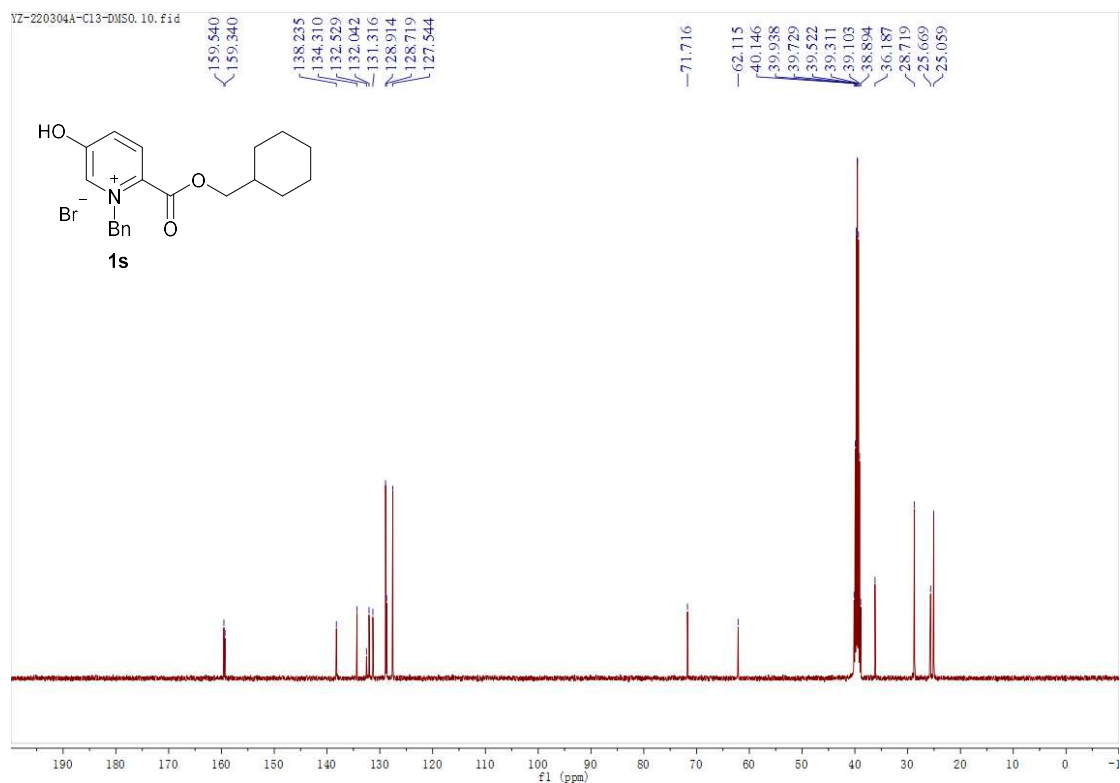

**<sup>13</sup>C-NMR Spectrum (100 MHz, DMSO-*d*<sub>6</sub>) of Compound 1s**

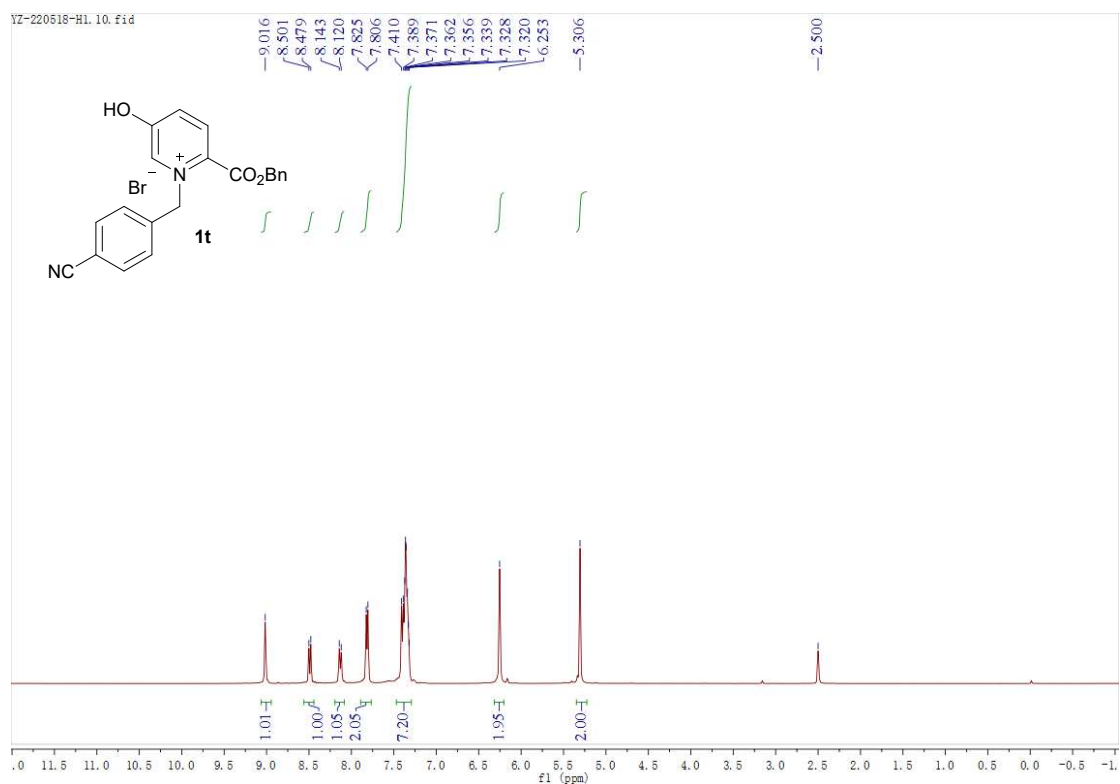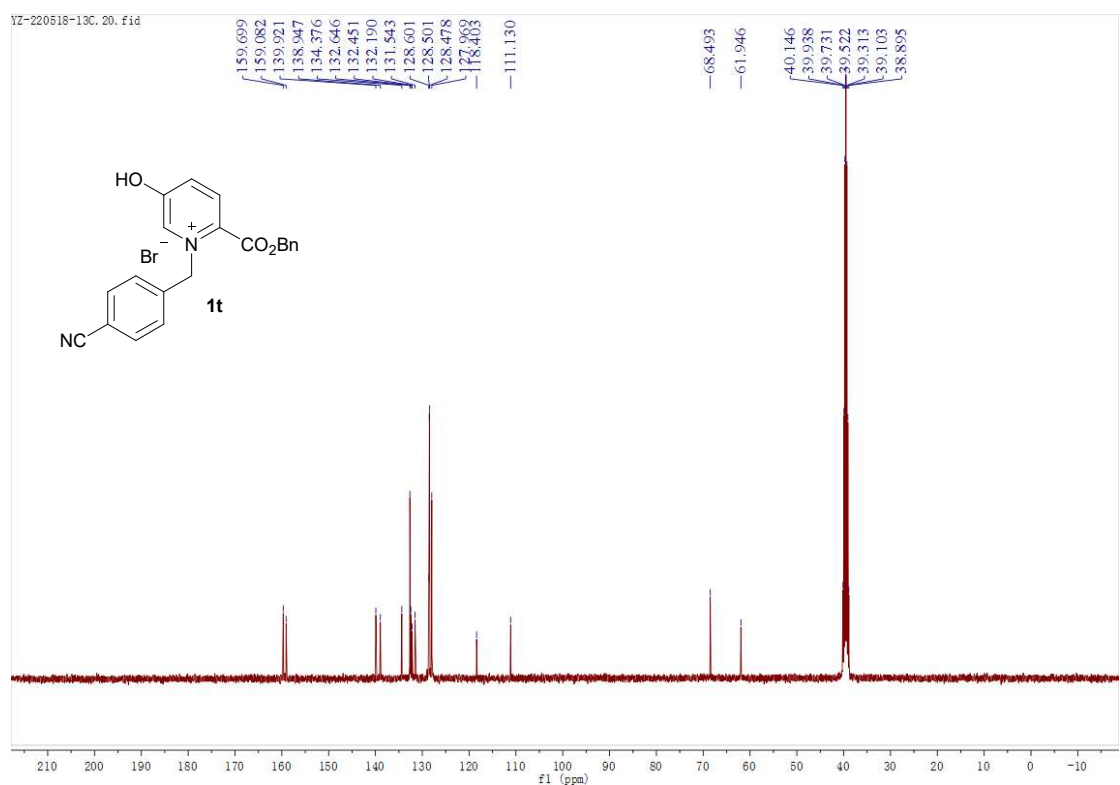

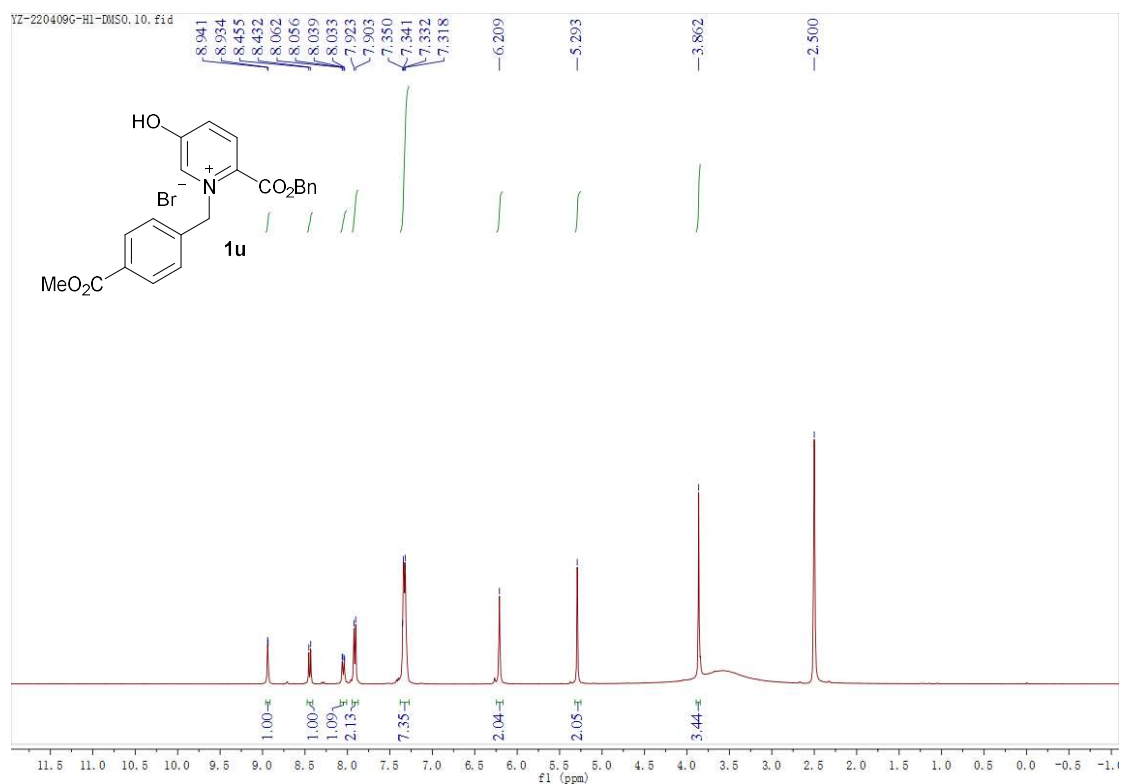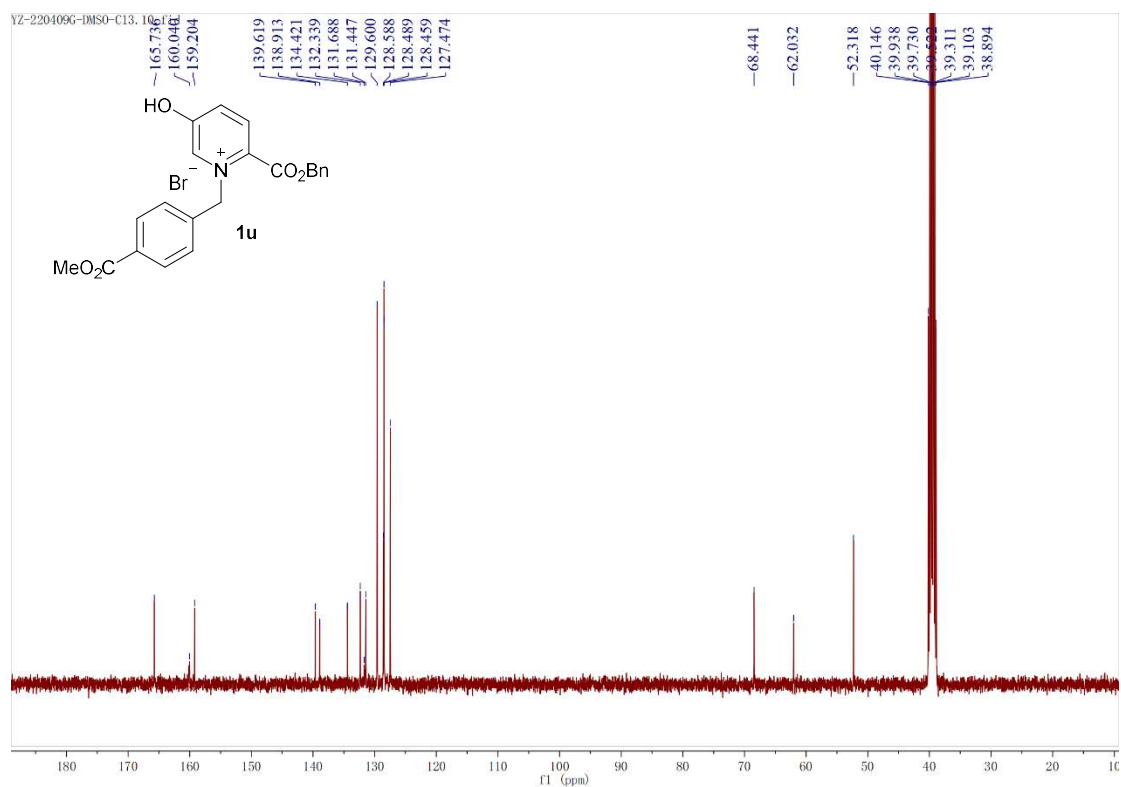

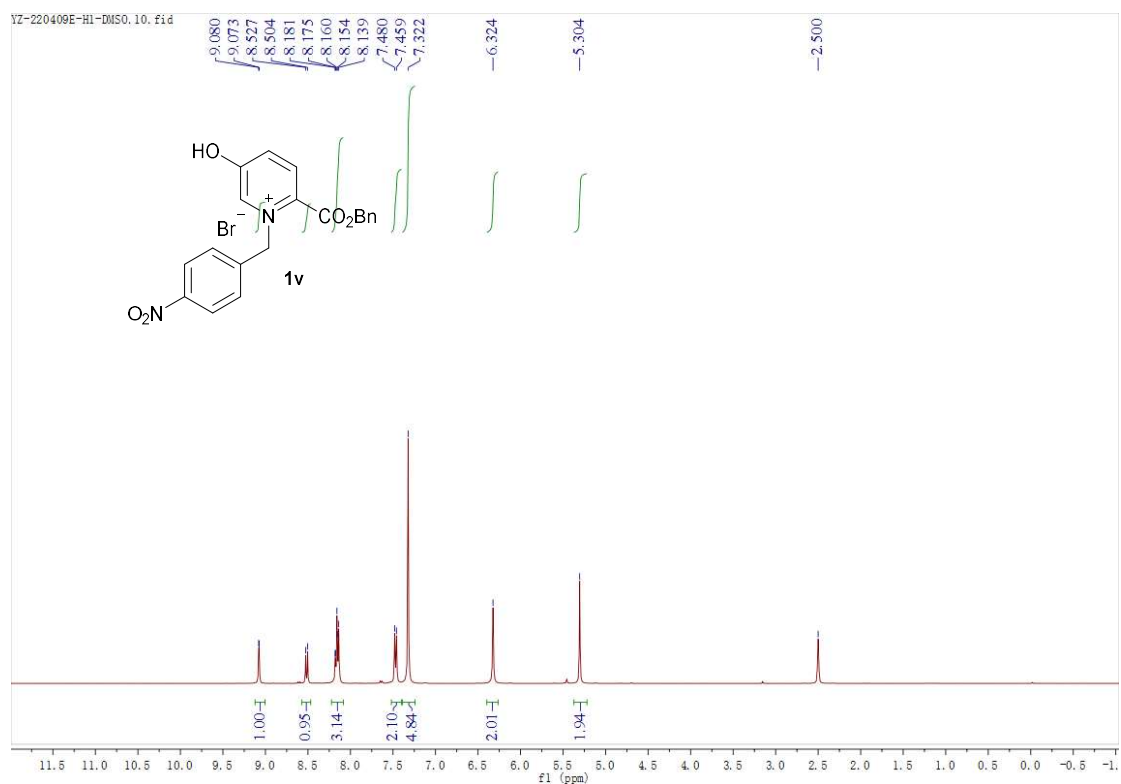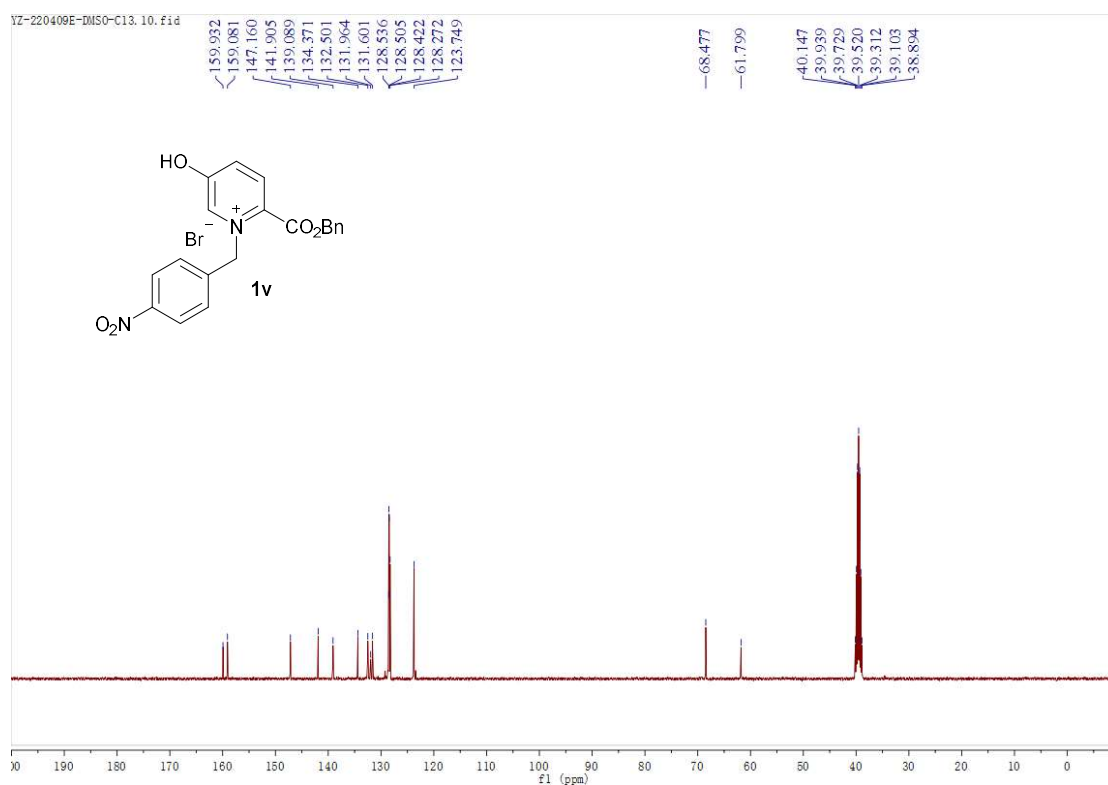

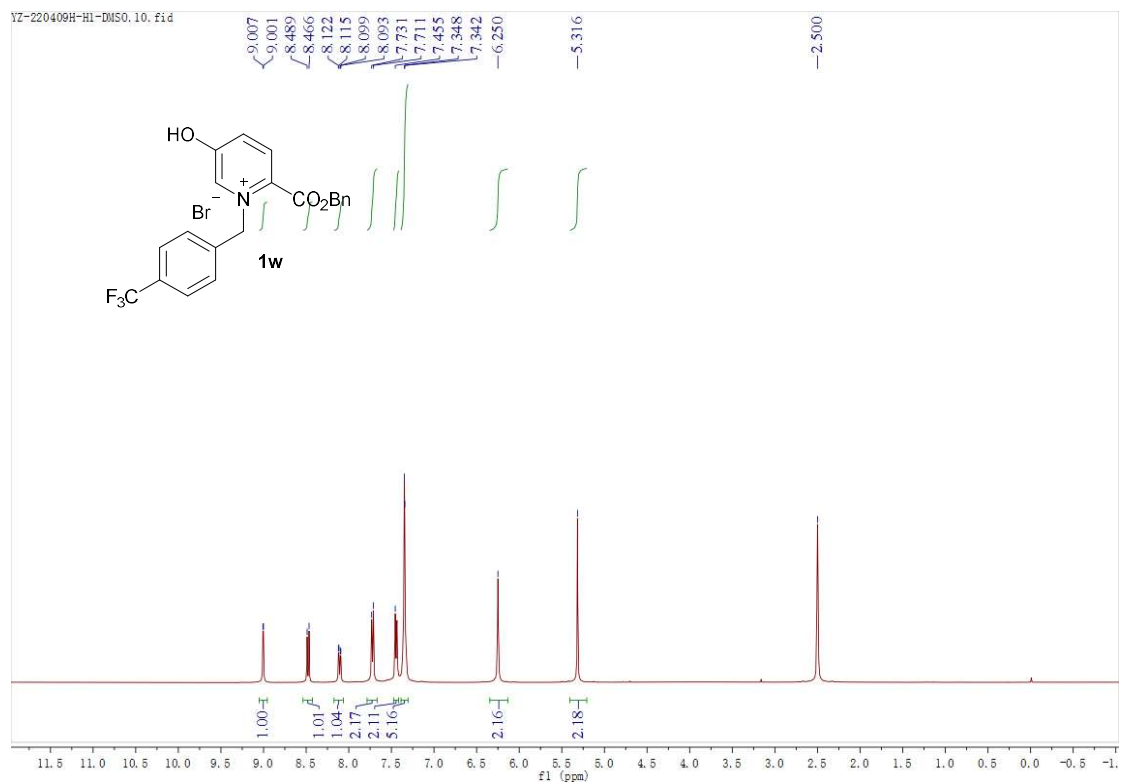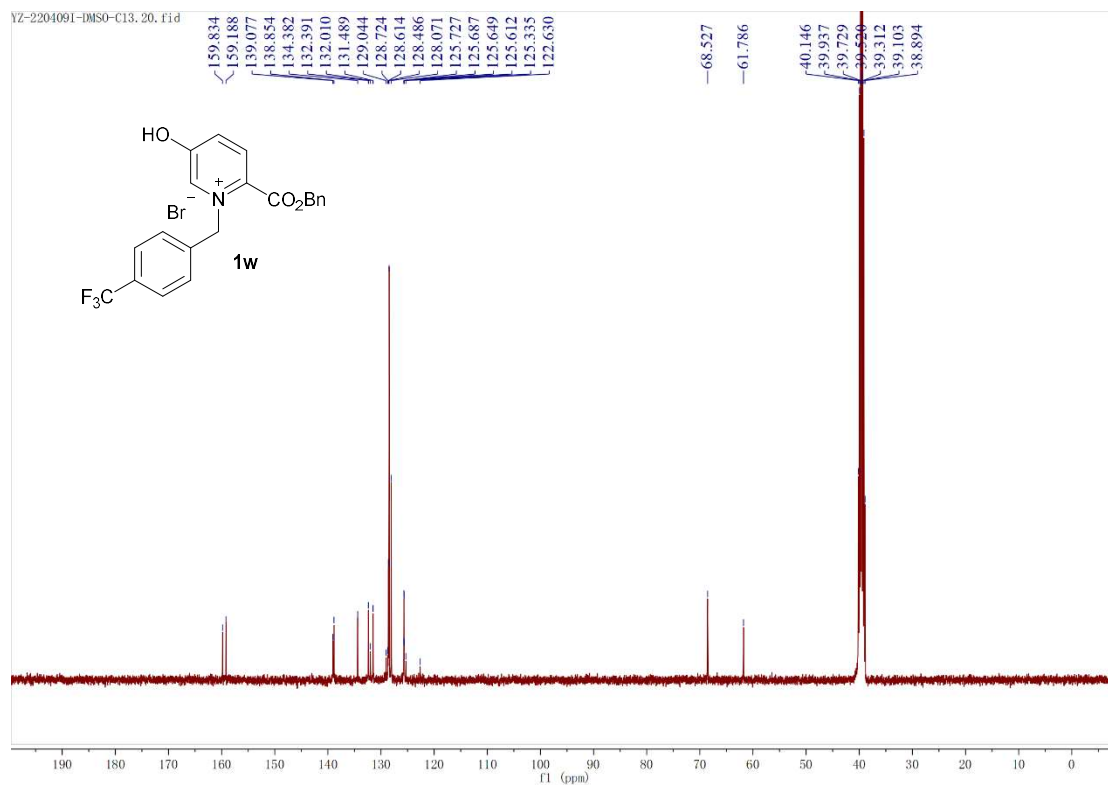

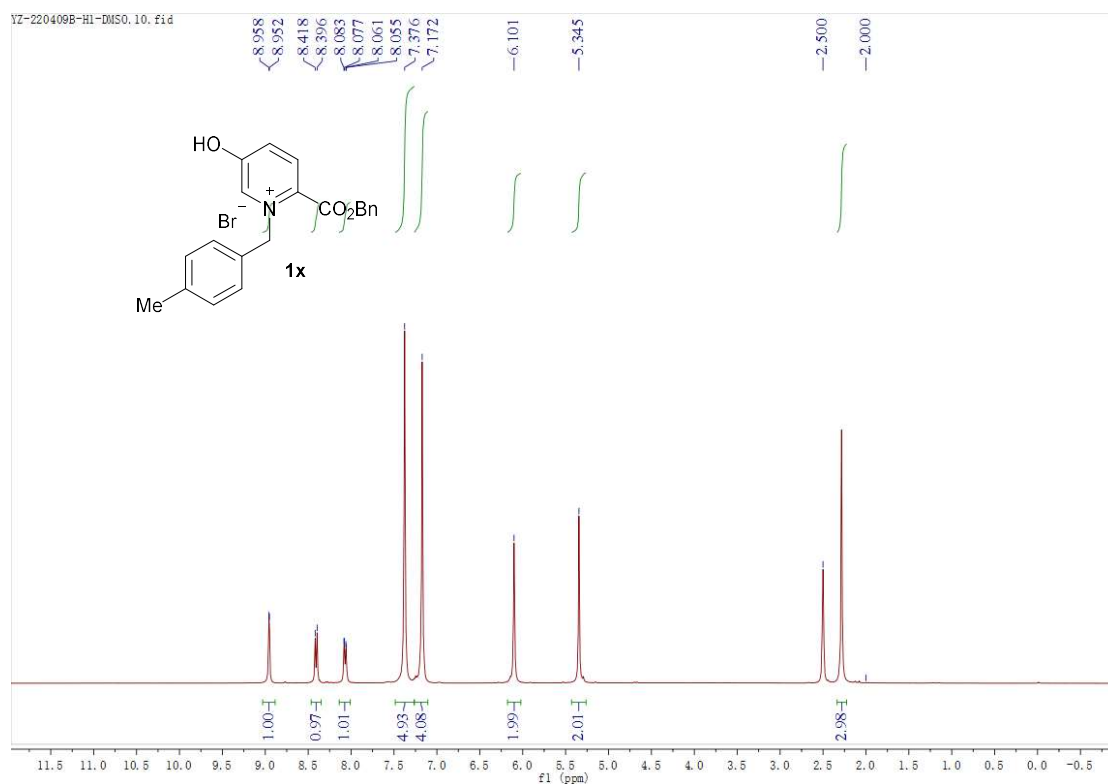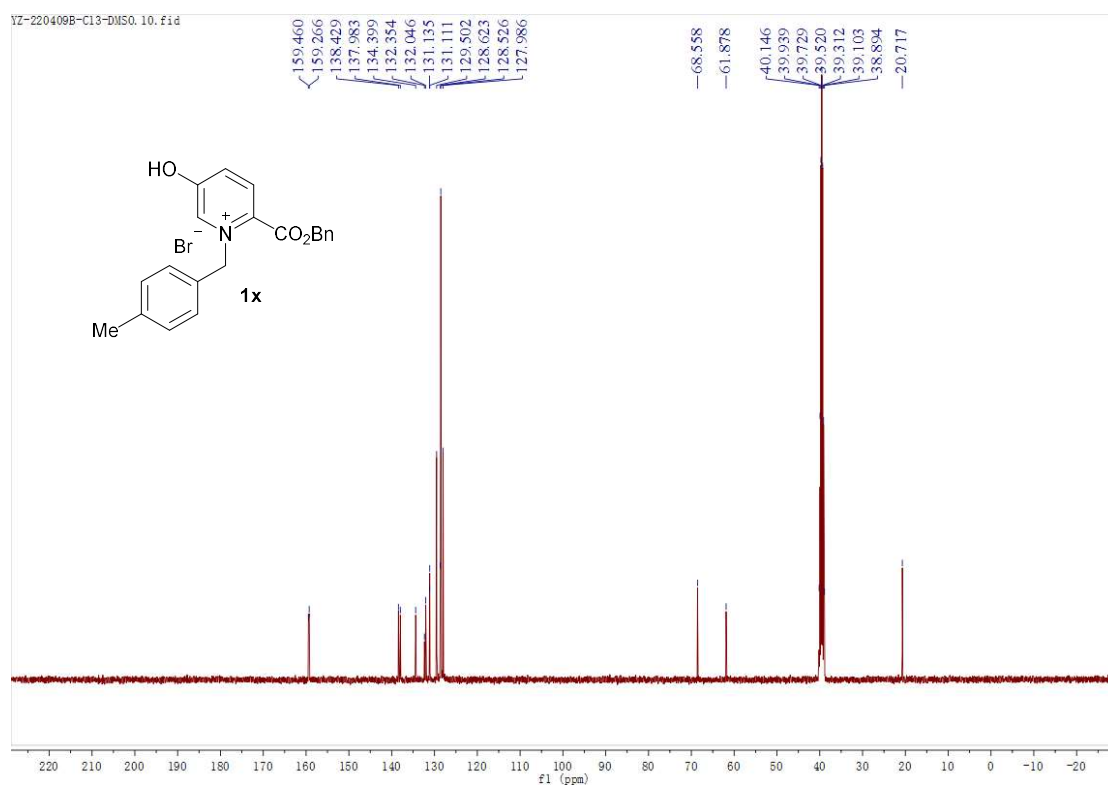



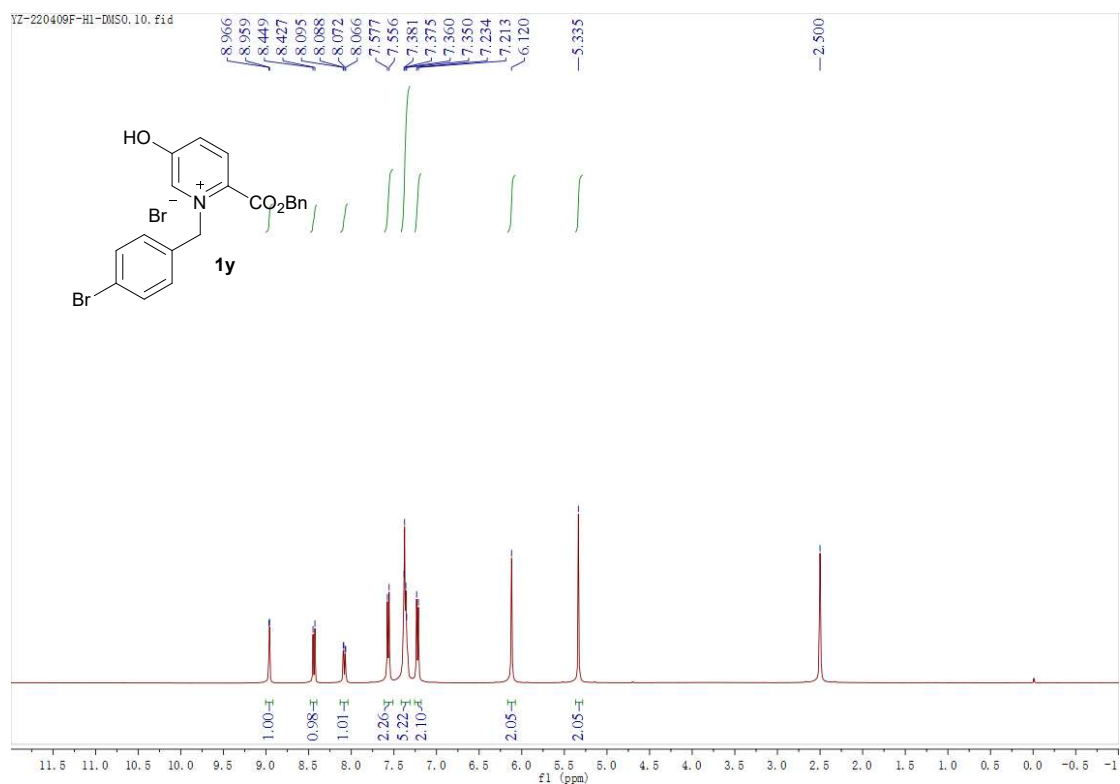

**<sup>1</sup>H-NMR Spectrum (400 MHz, DMSO-*d*<sub>6</sub>) of Compound 1y**

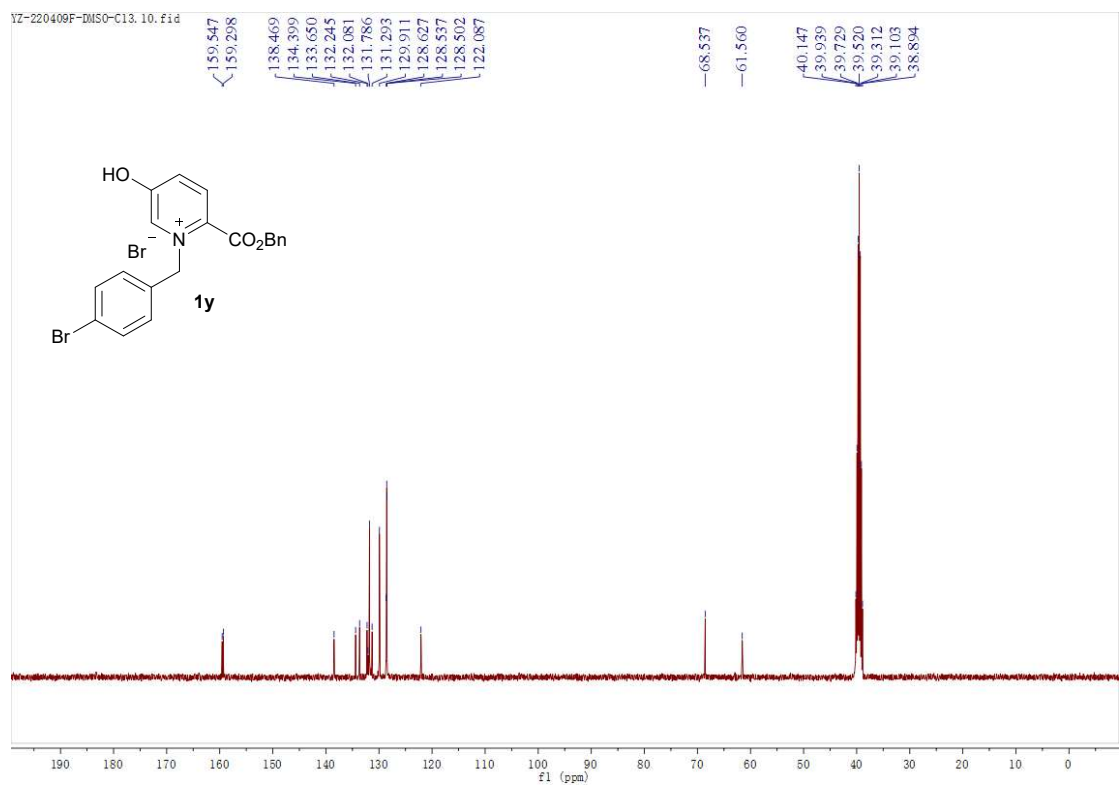

**<sup>13</sup>C-NMR Spectrum (100 MHz, DMSO-*d*<sub>6</sub>) of Compound 1y**

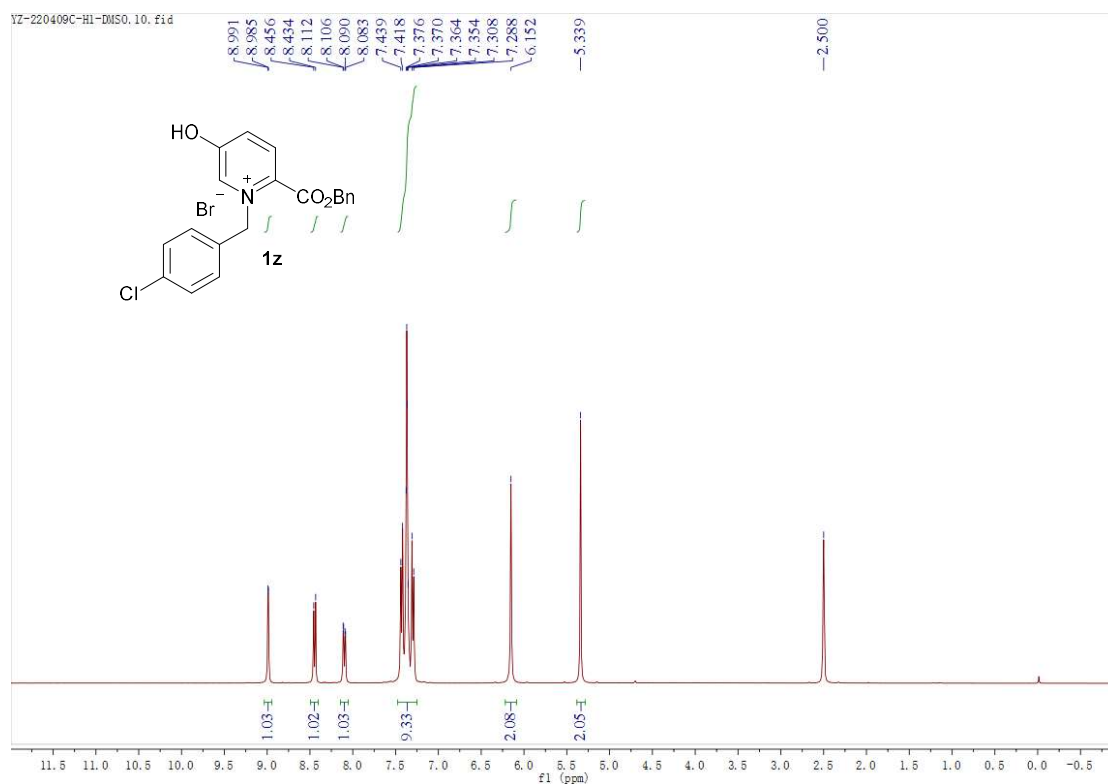

**<sup>1</sup>H-NMR Spectrum (400 MHz, DMSO-*d*<sub>6</sub>) of Compound 1z**

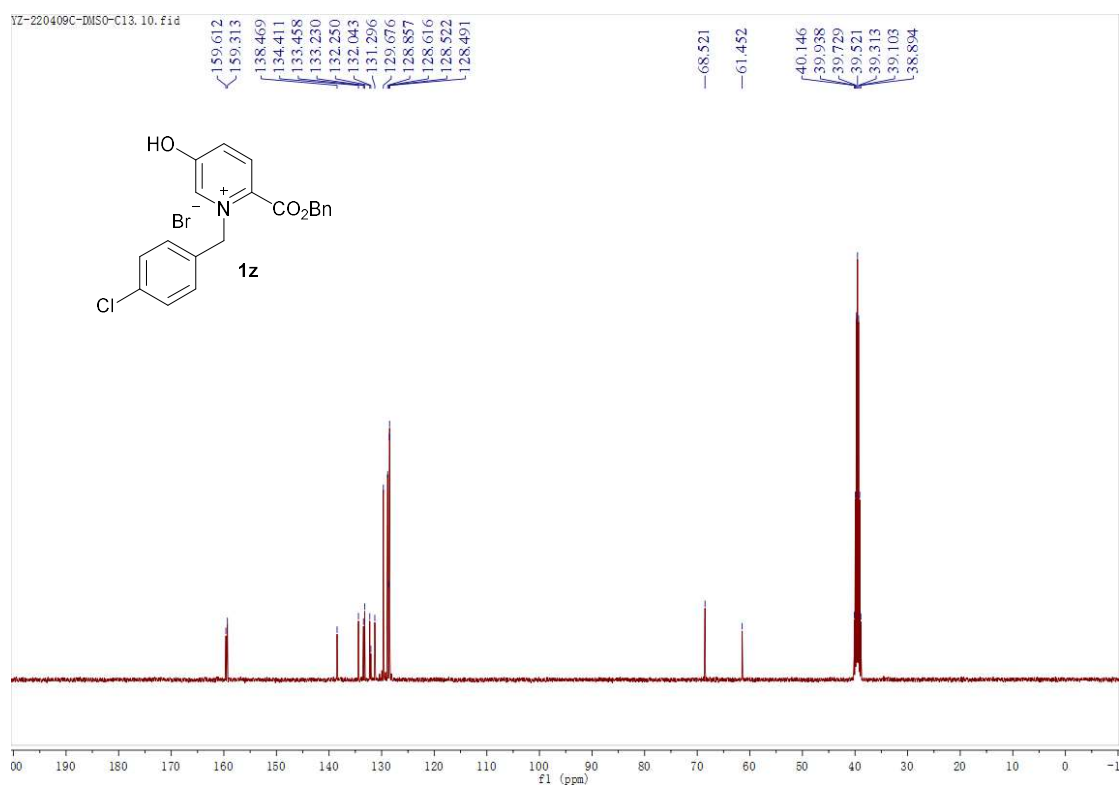

**<sup>13</sup>C-NMR Spectrum (100 MHz, DMSO-*d*<sub>6</sub>) of Compound 1z**

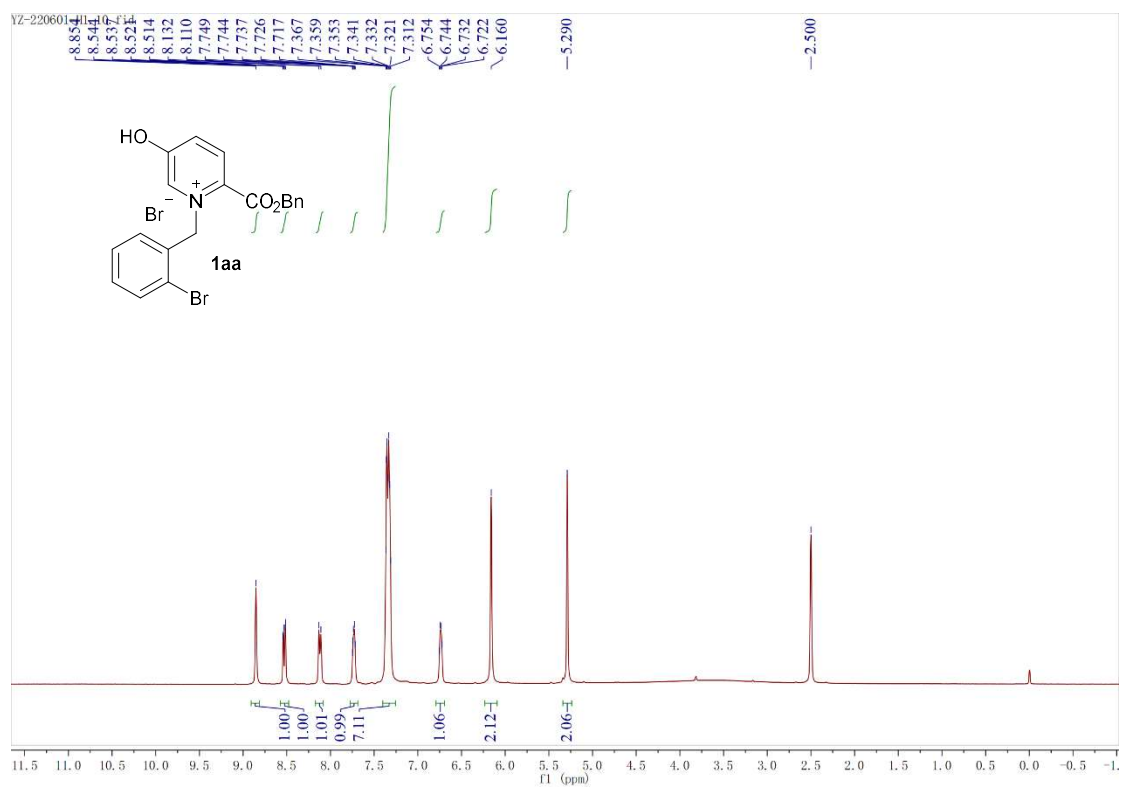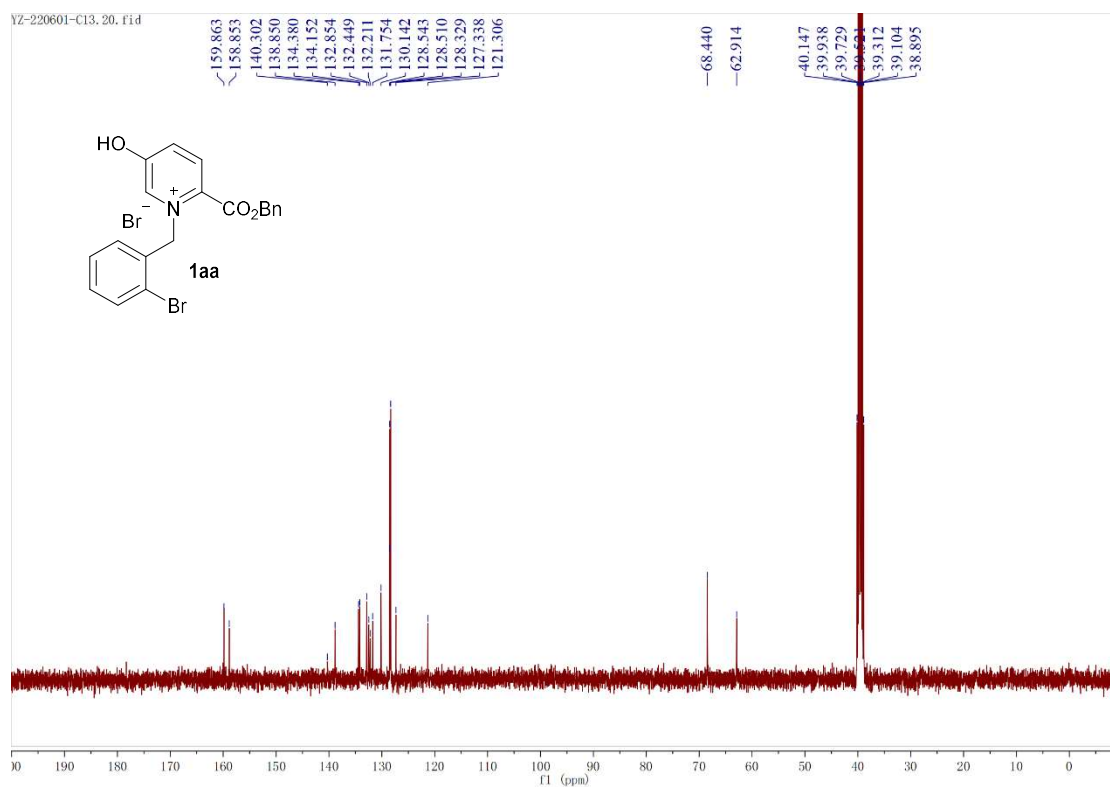

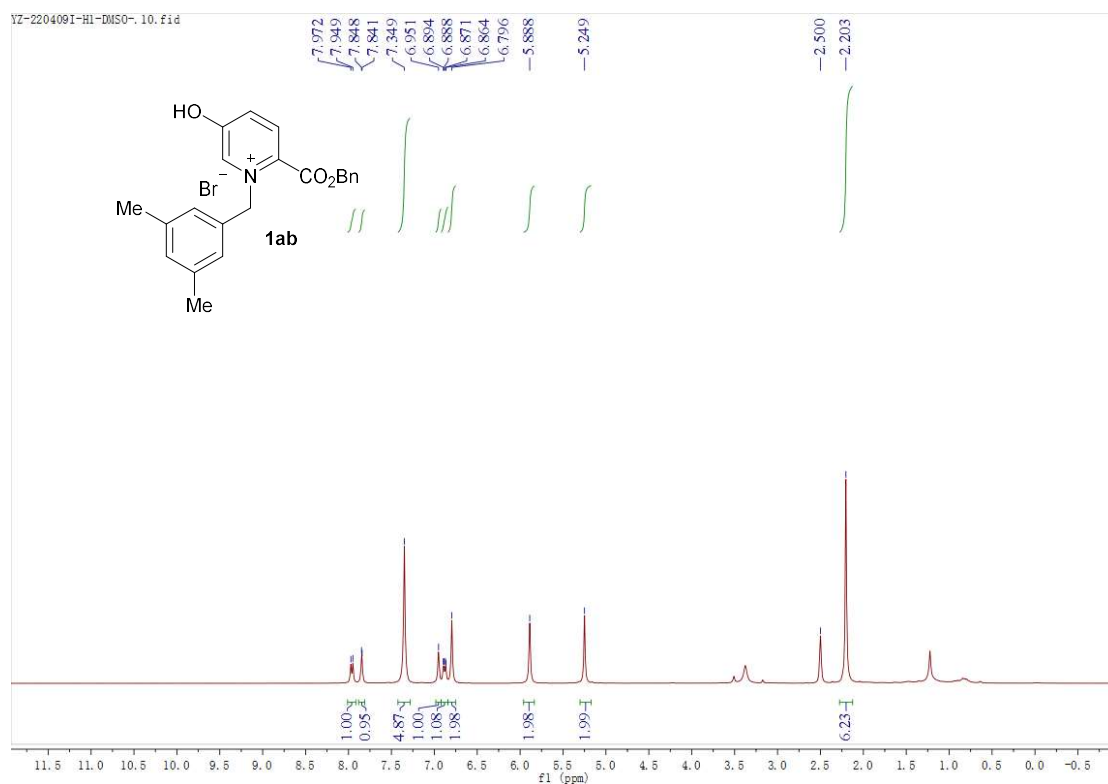

**<sup>1</sup>H-NMR Spectrum (400 MHz, DMSO-*d*<sub>6</sub>) of Compound 1ab**

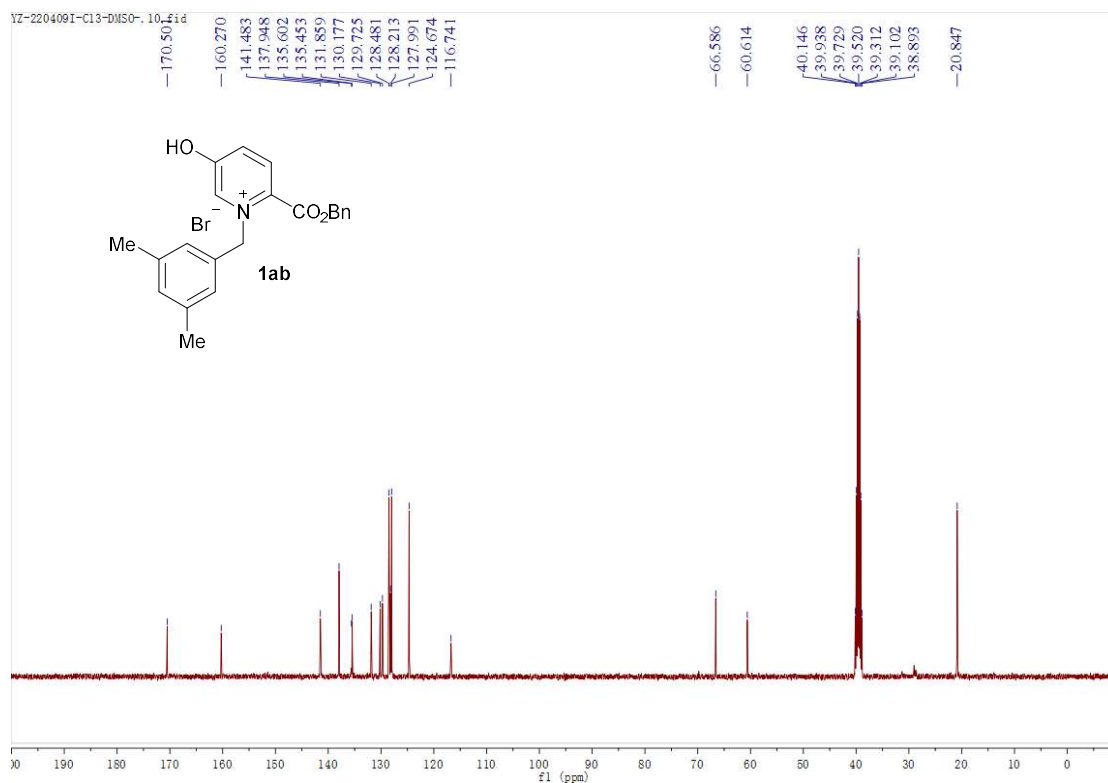

**<sup>13</sup>C-NMR Spectrum (100 MHz, DMSO-*d*<sub>6</sub>) of Compound 1ab**

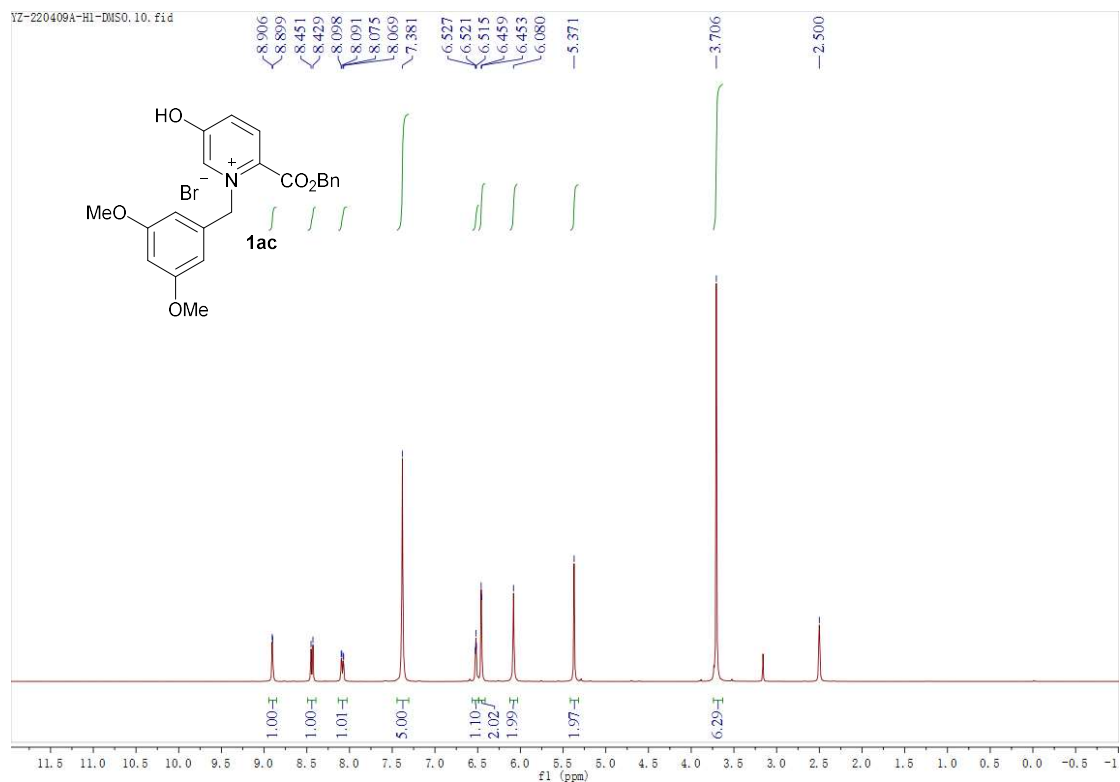

**<sup>1</sup>H-NMR Spectrum (400 MHz, DMSO-*d*<sub>6</sub>) of Compound 1ac**

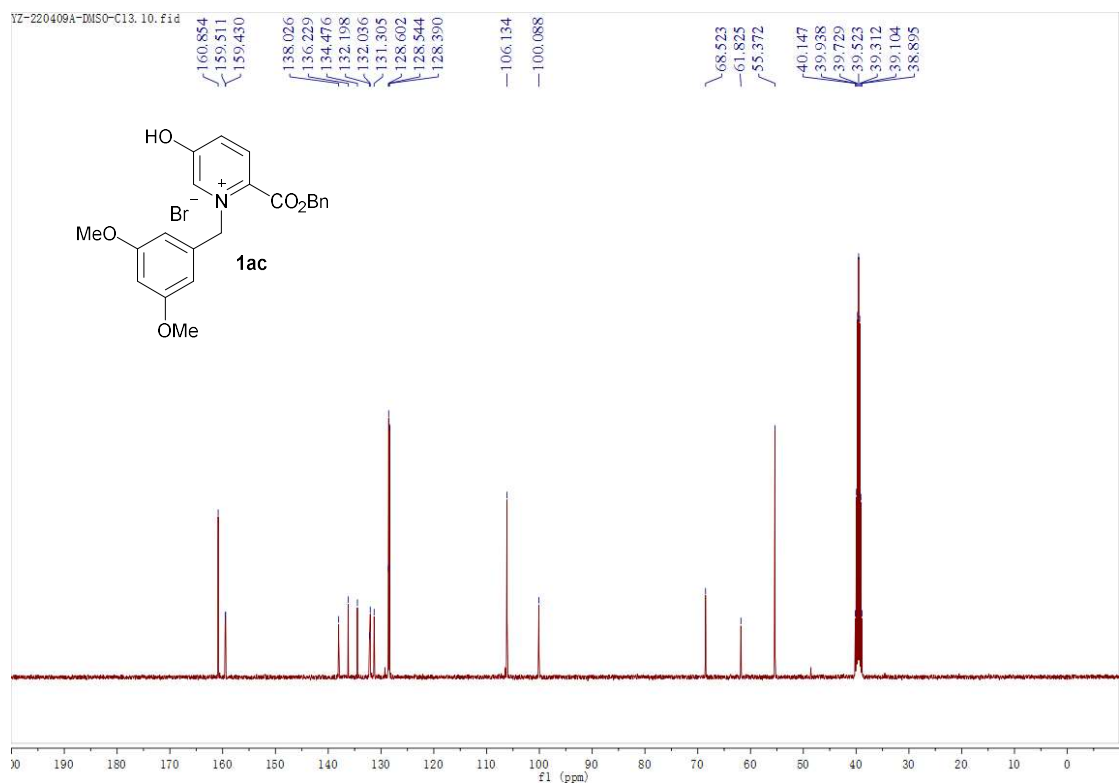

**<sup>13</sup>C-NMR Spectrum (100 MHz, DMSO-*d*<sub>6</sub>) of Compound 1ac**

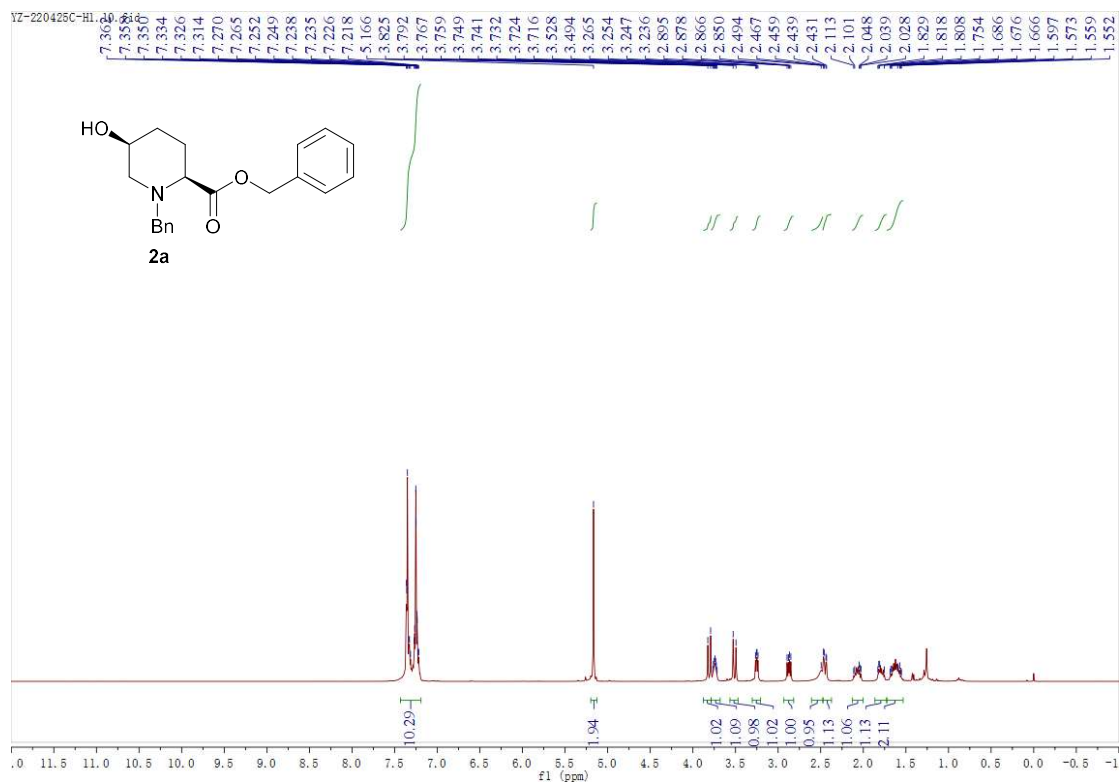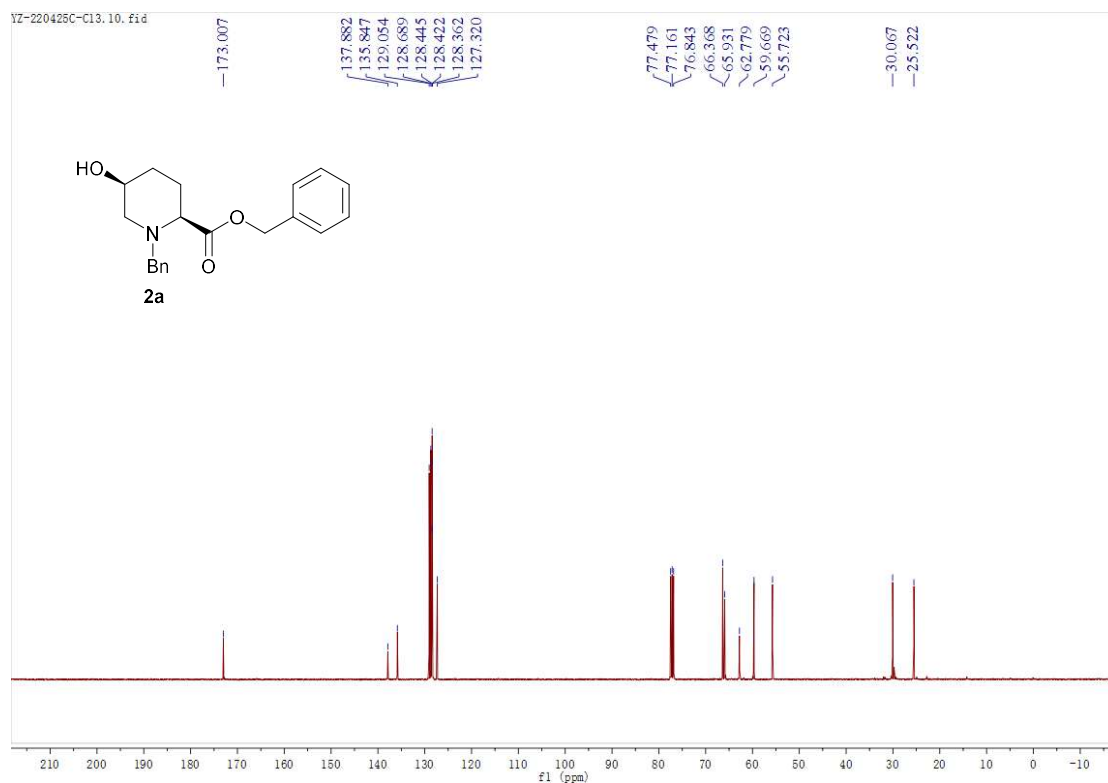

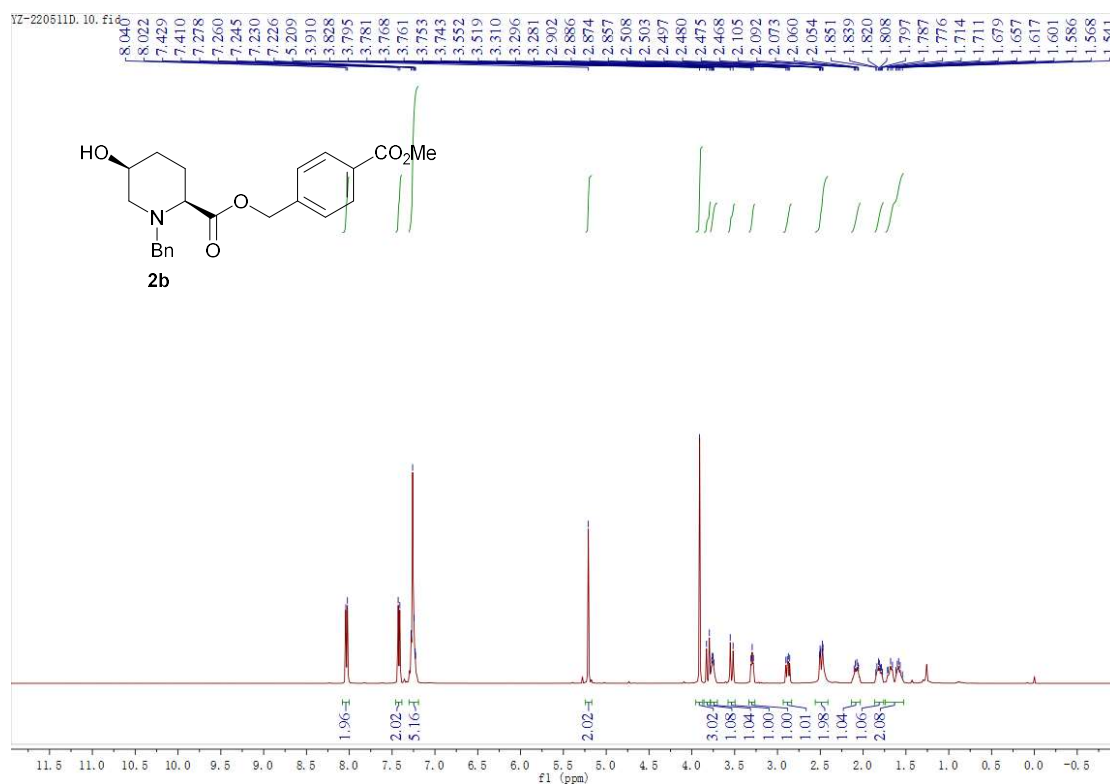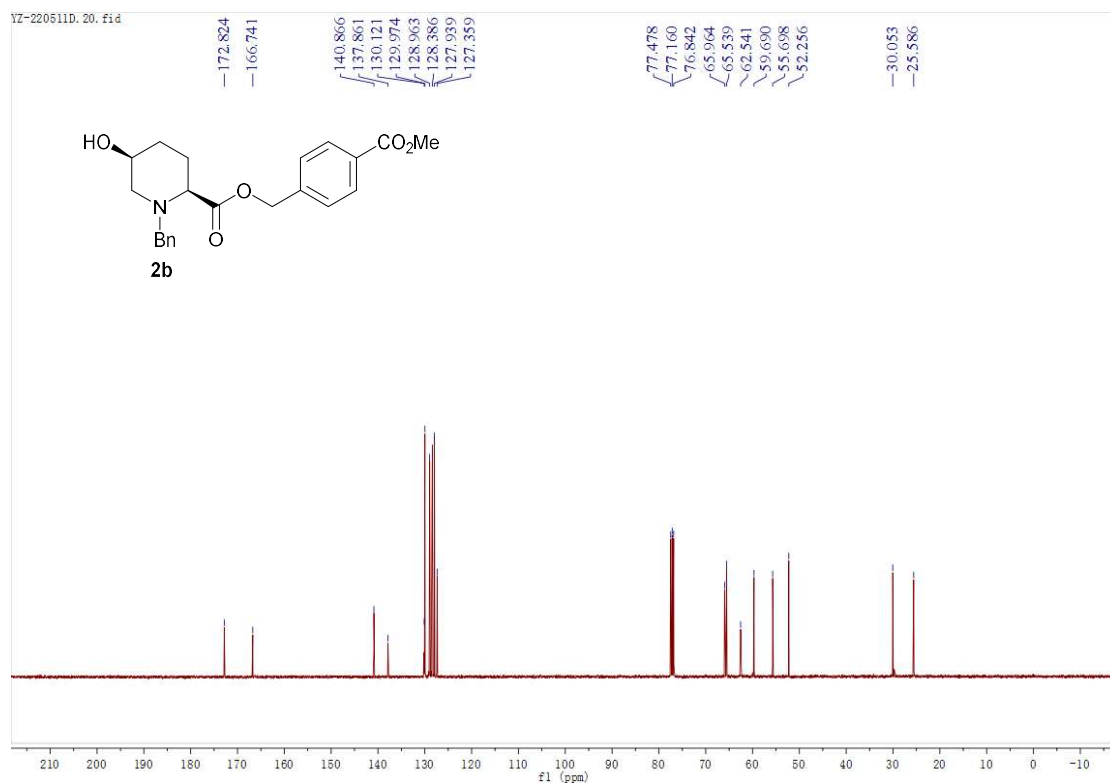

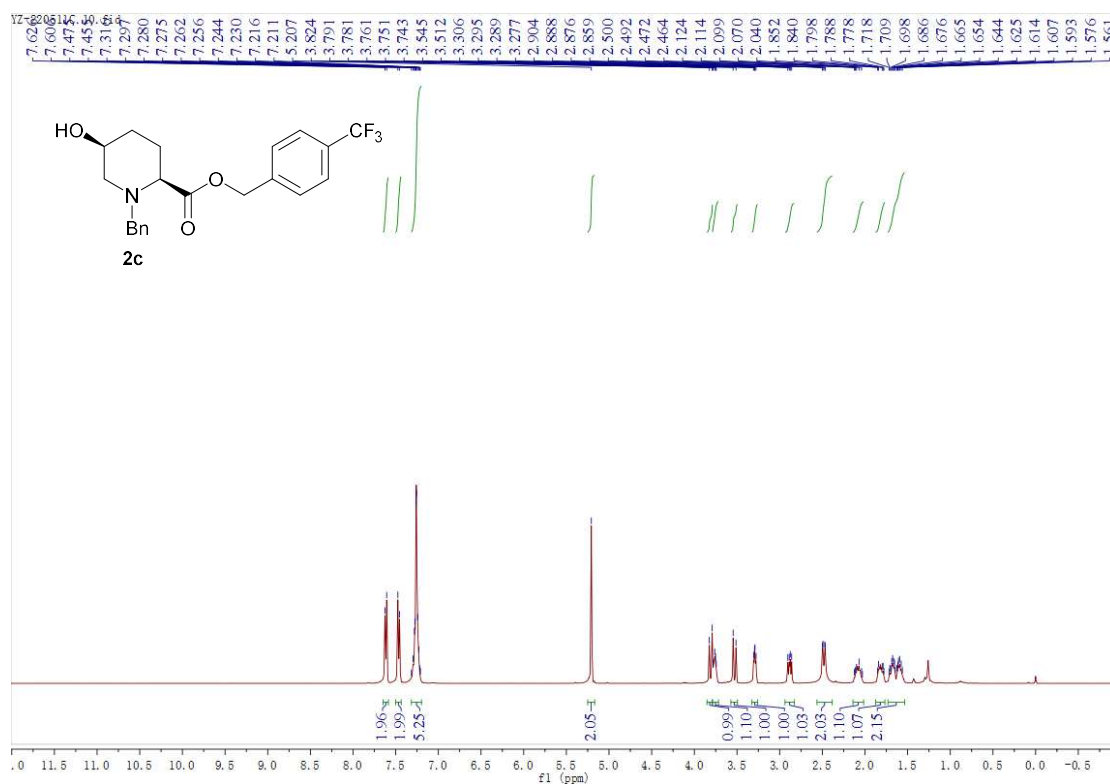

**<sup>1</sup>H-NMR Spectrum (400 MHz, Chloroform-*d*) of Compound 2c**

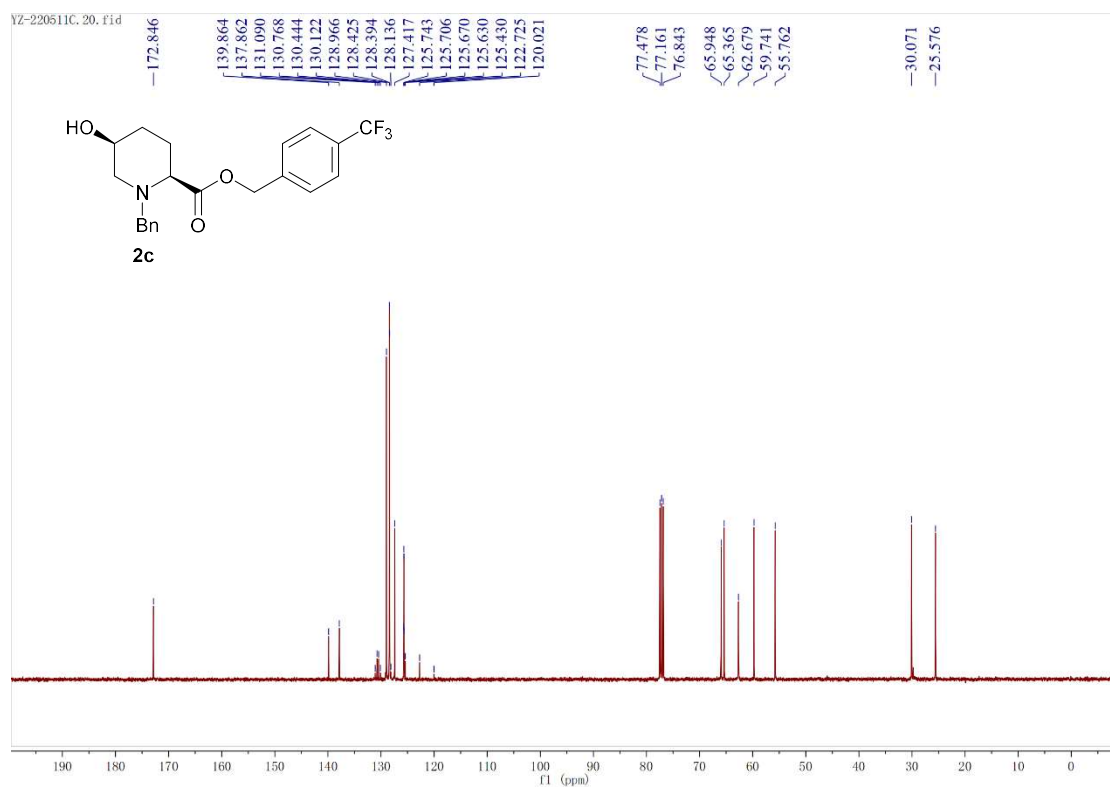

**<sup>13</sup>C-NMR Spectrum (100 MHz, Chloroform-*d*) of Compound 2c**



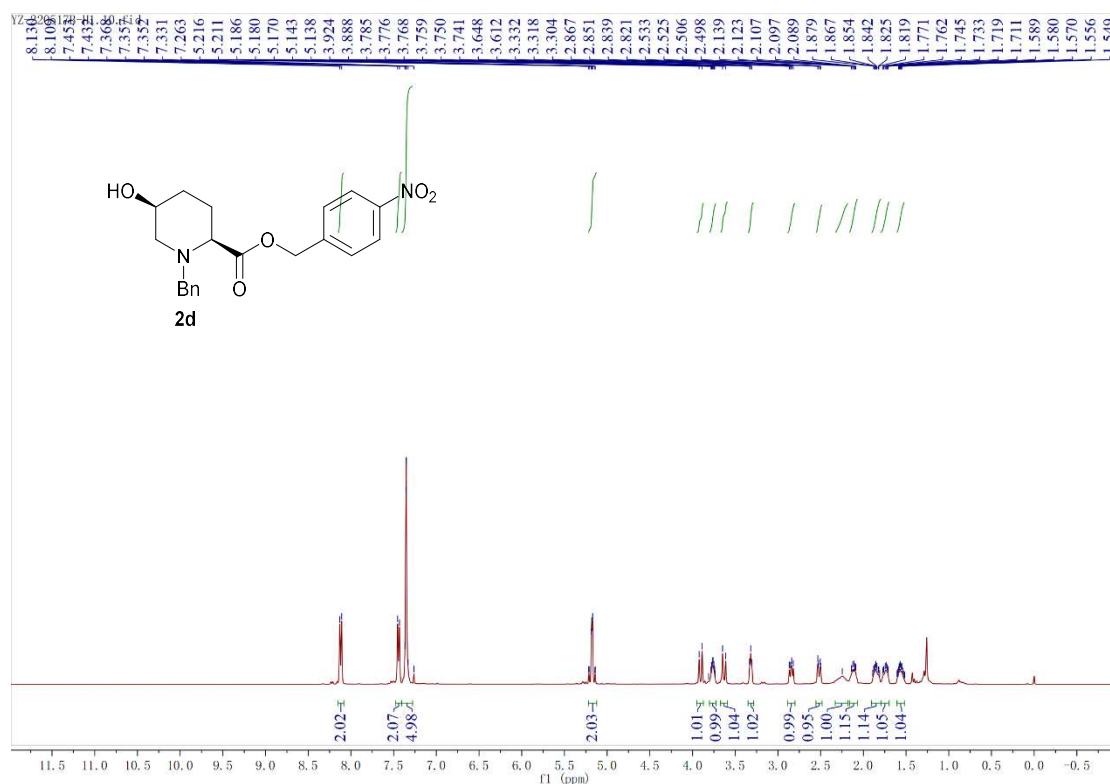

<sup>1</sup>H-NMR Spectrum (400 MHz, Chloroform-*d*) of Compound 2d

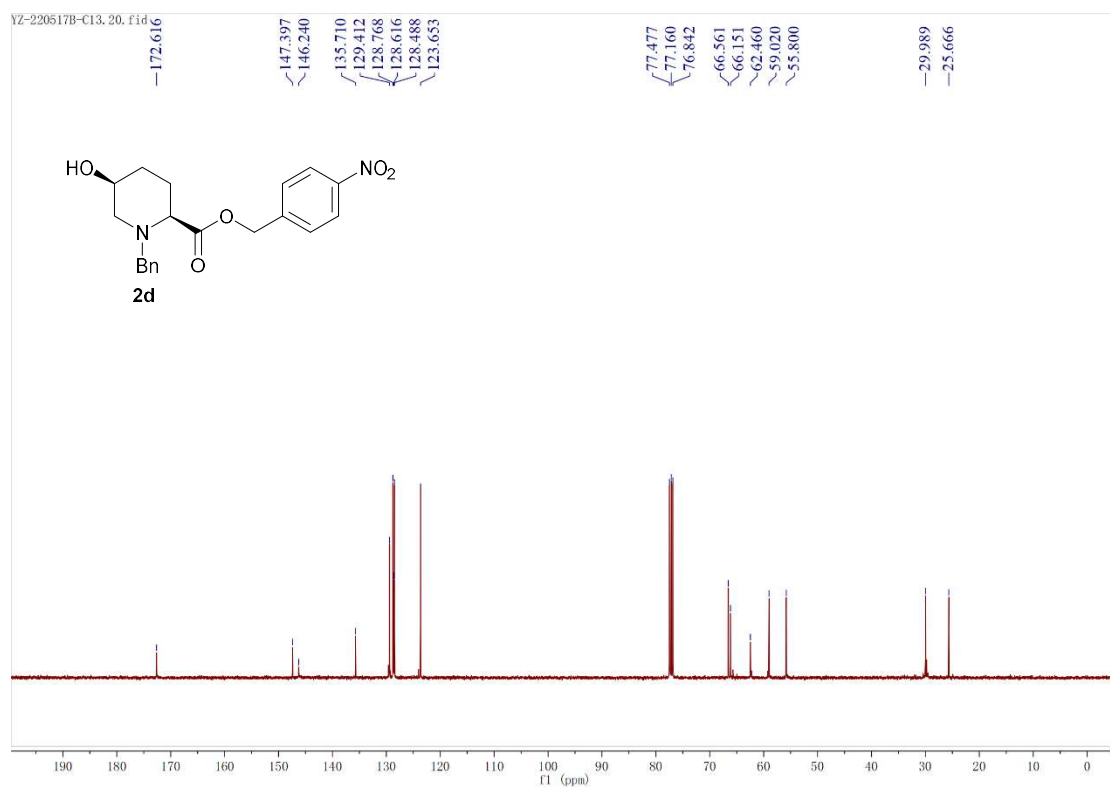

<sup>13</sup>C-NMR Spectrum (100 MHz, Chloroform-*d*) of Compound 2d

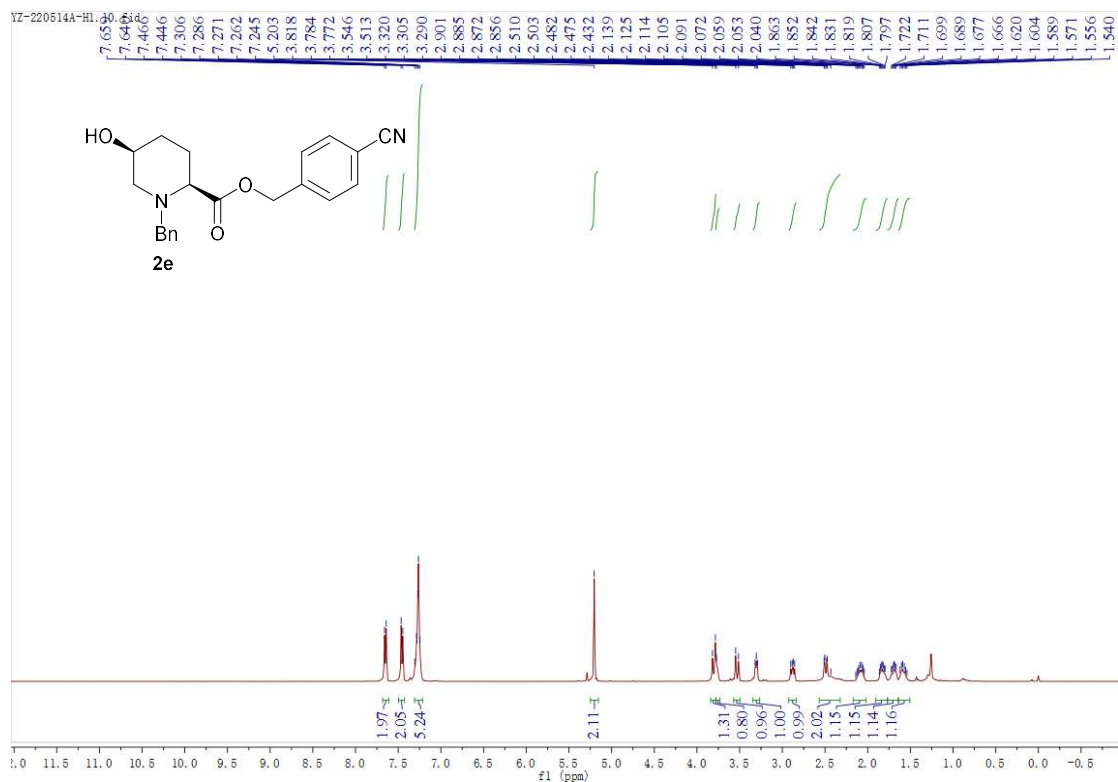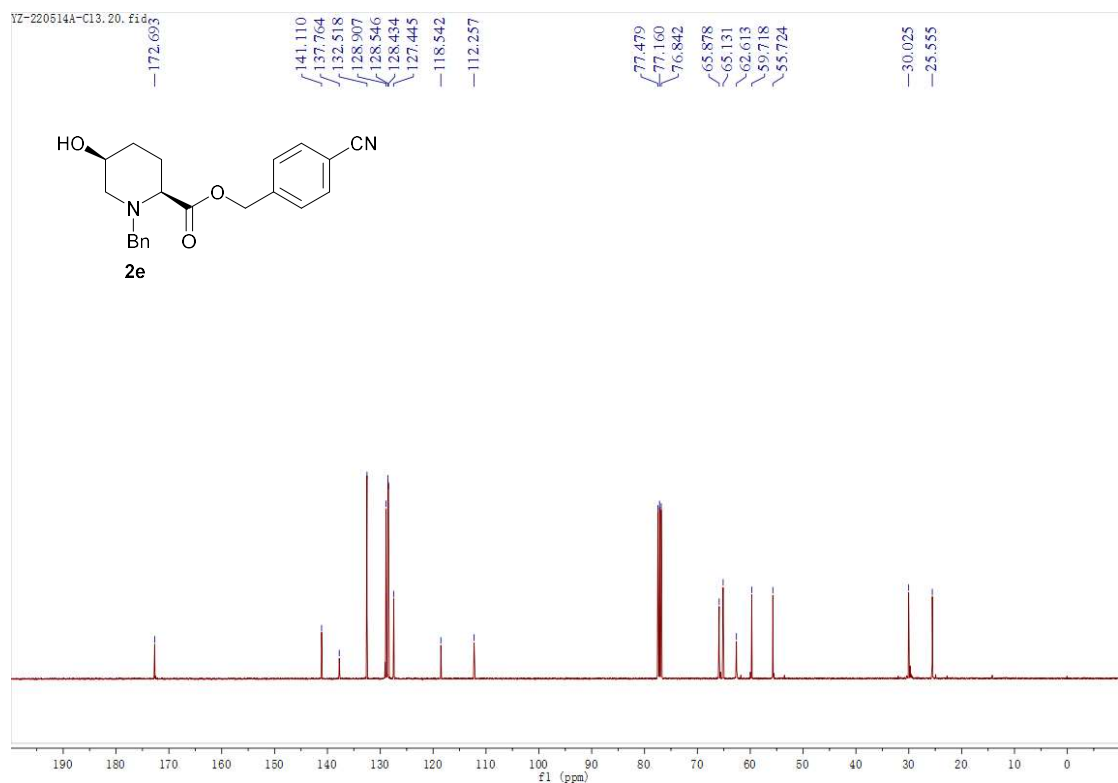

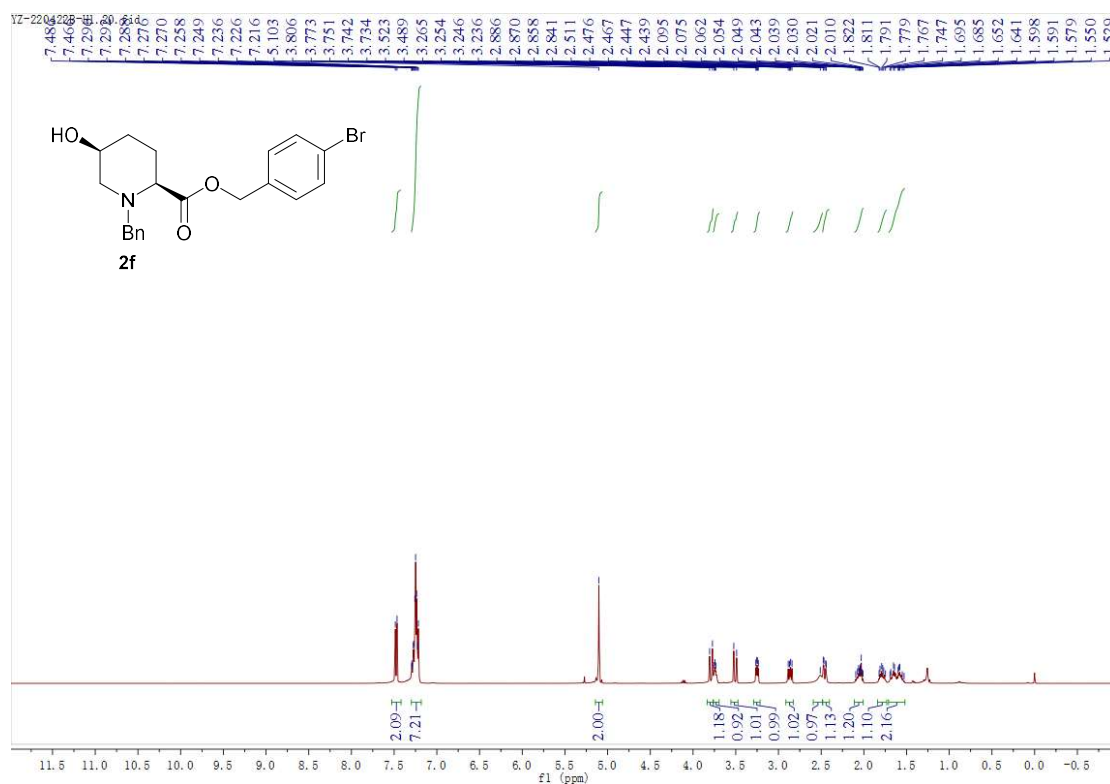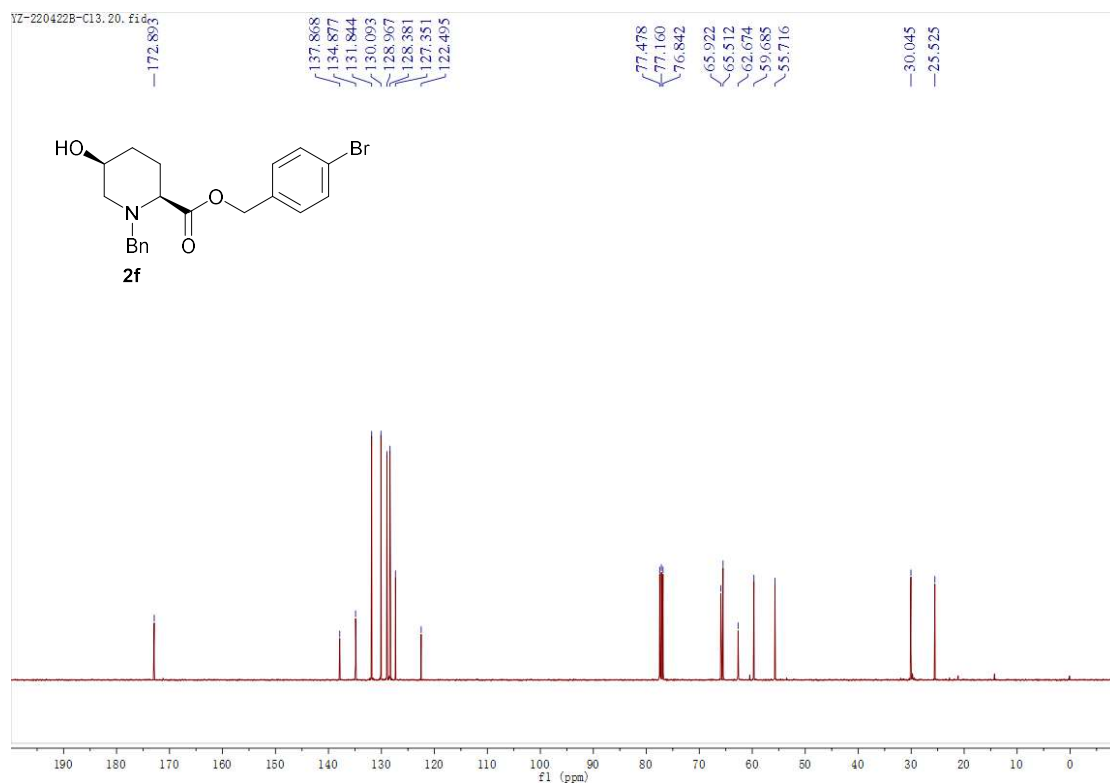

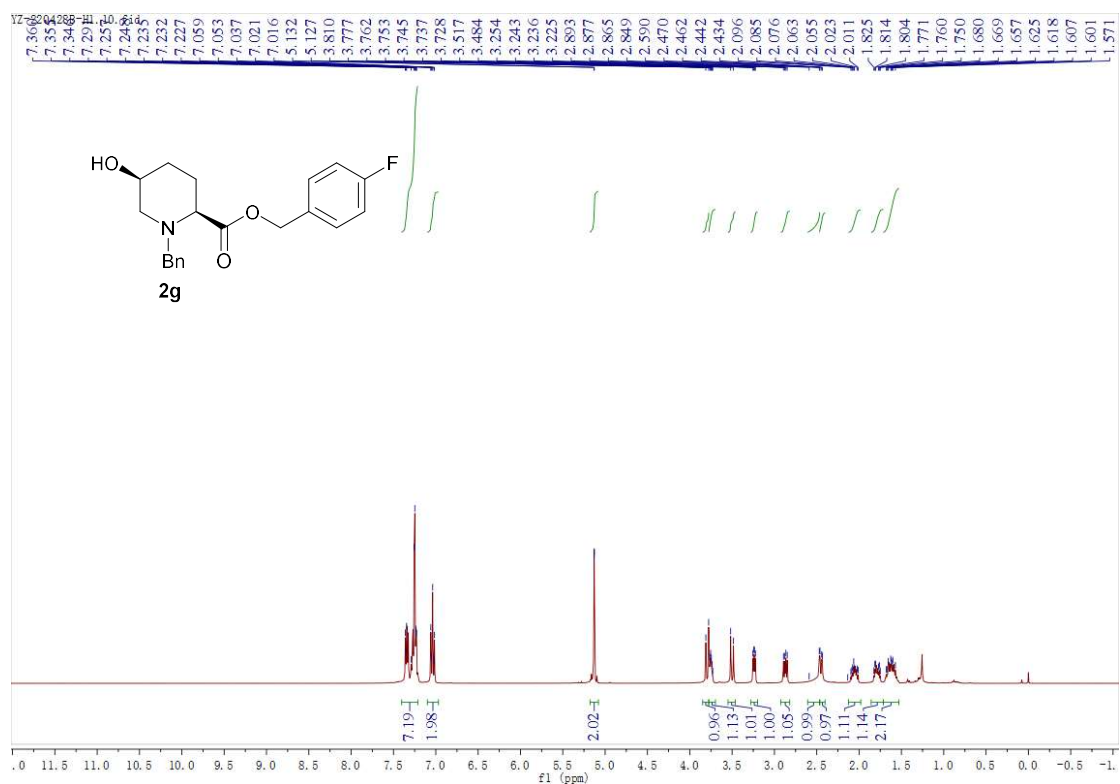

**<sup>1</sup>H-NMR Spectrum (400 MHz, Chloroform-*d*) of Compound 2g**

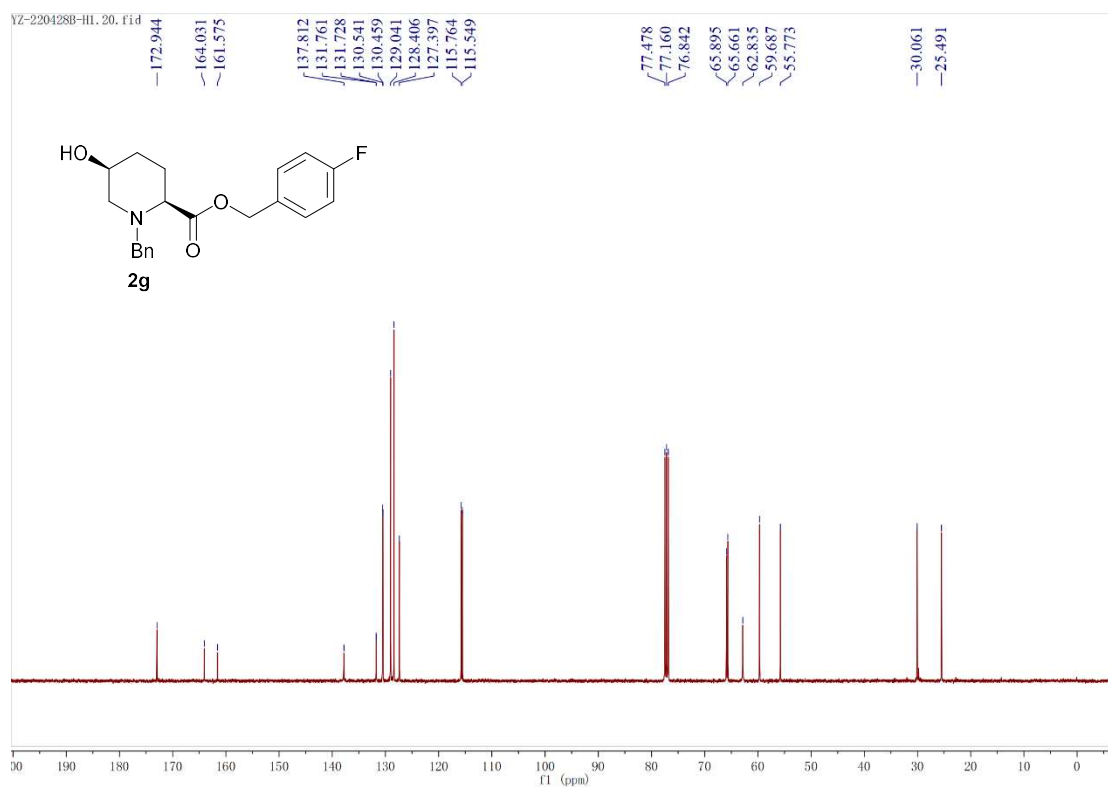

**<sup>13</sup>C-NMR Spectrum (100 MHz, Chloroform-*d*) of Compound 2g**

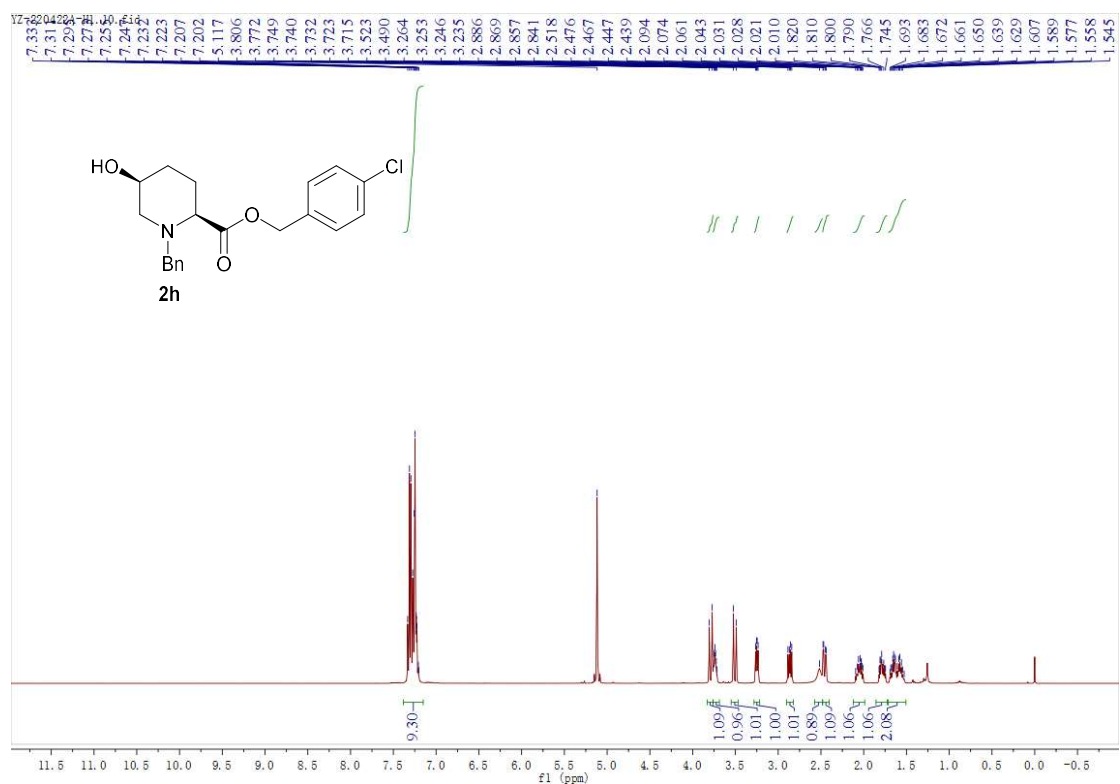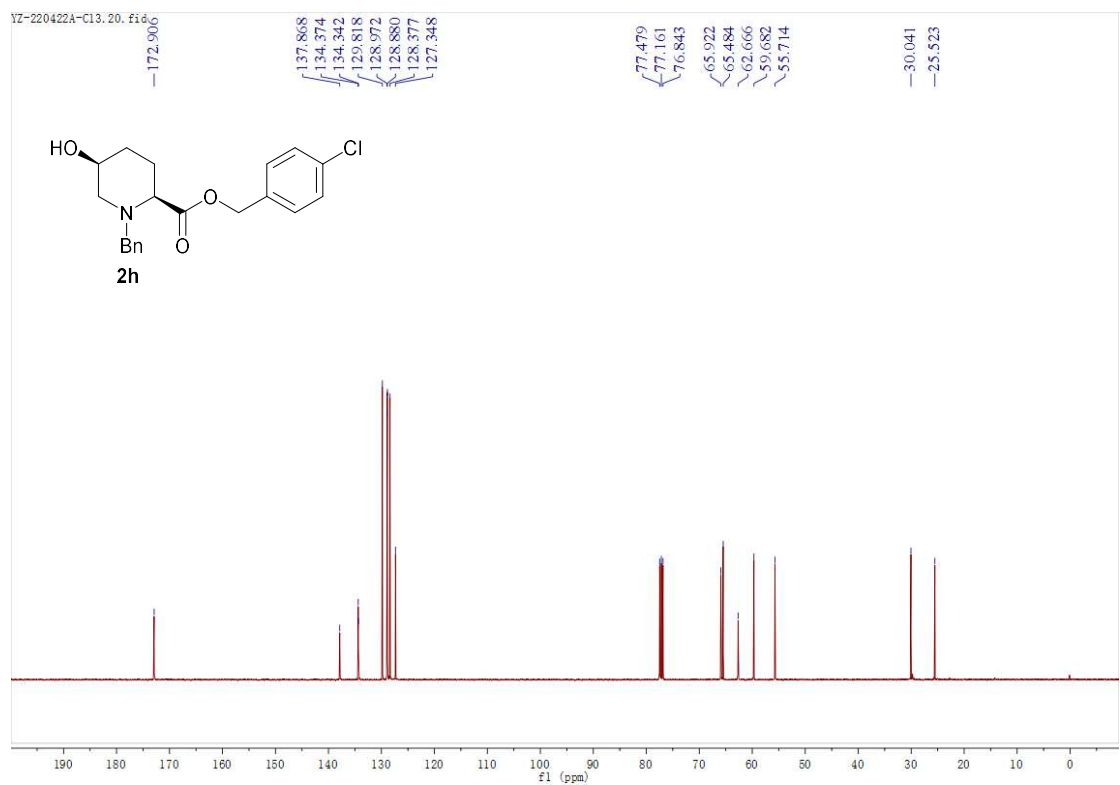

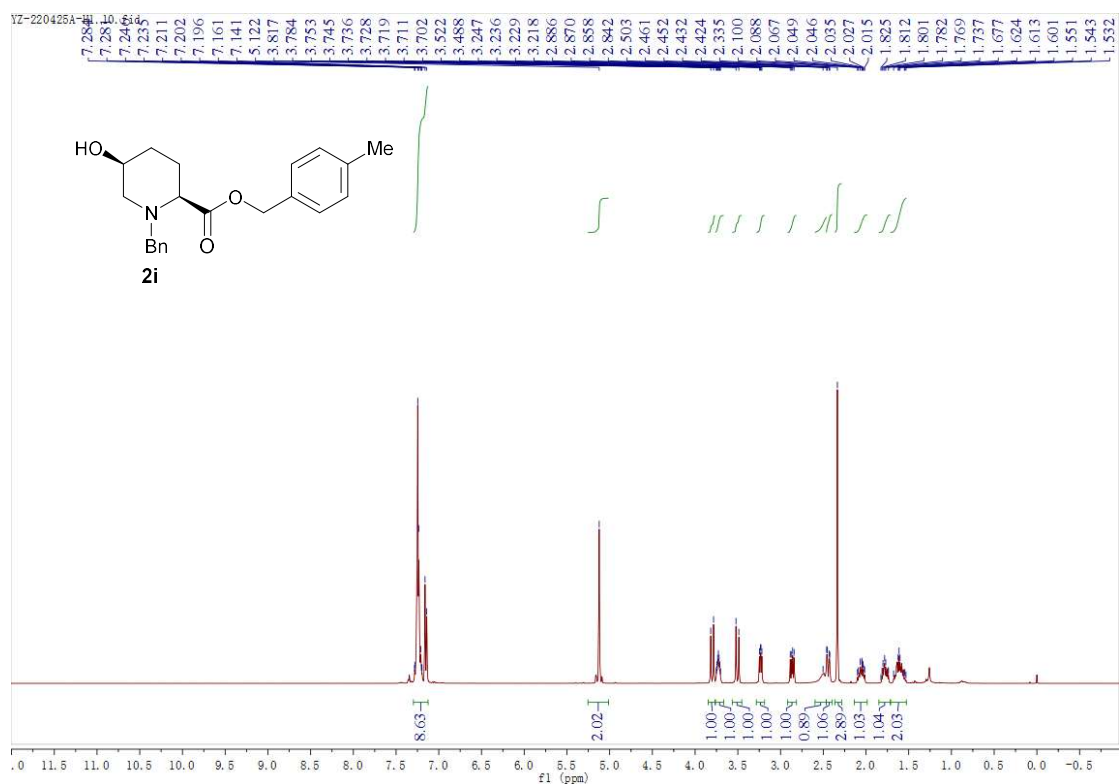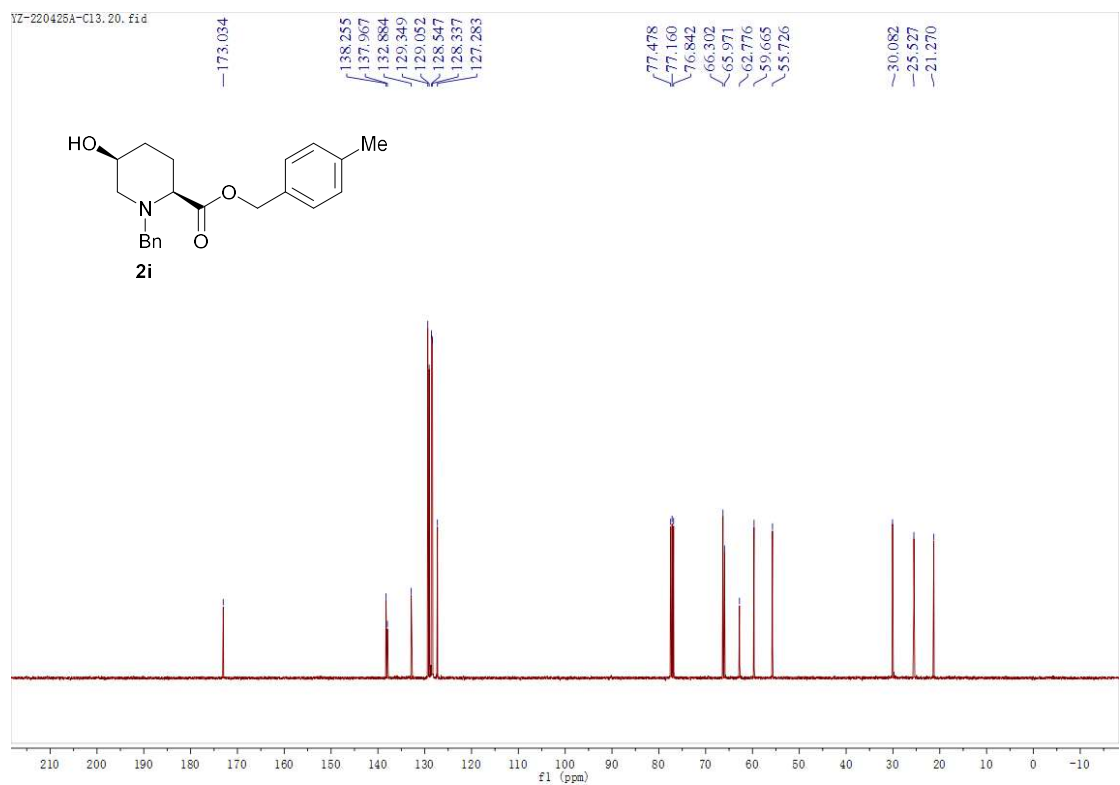

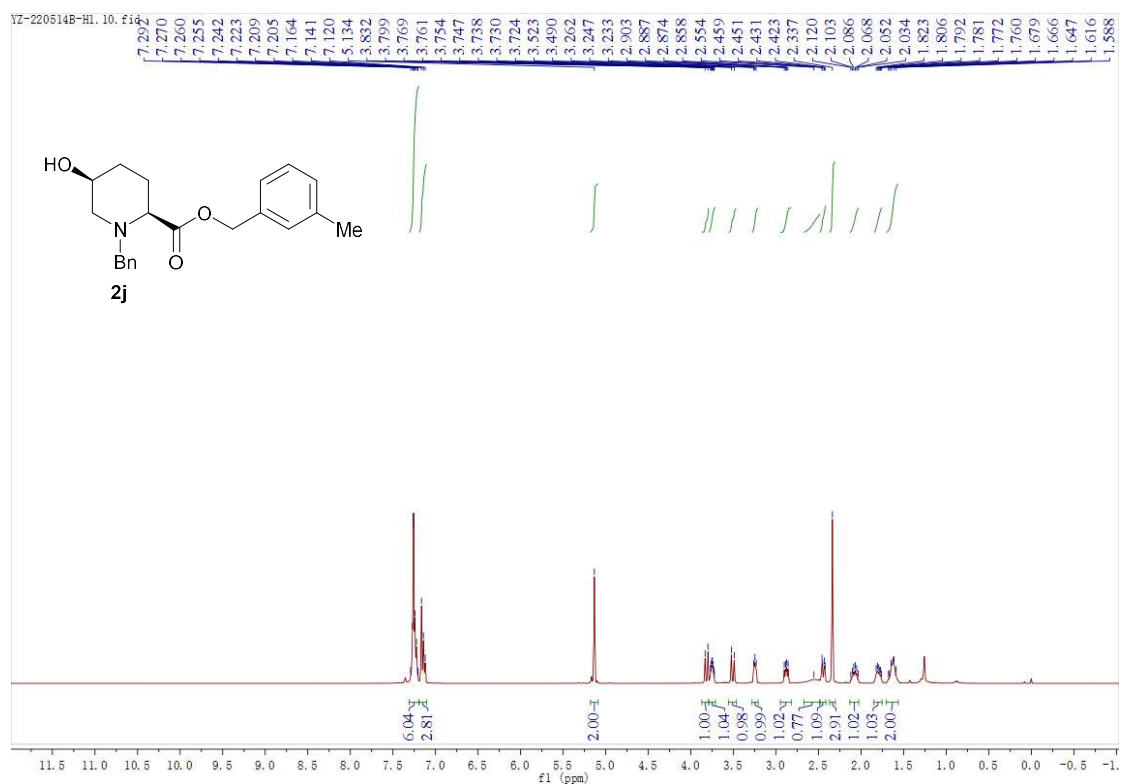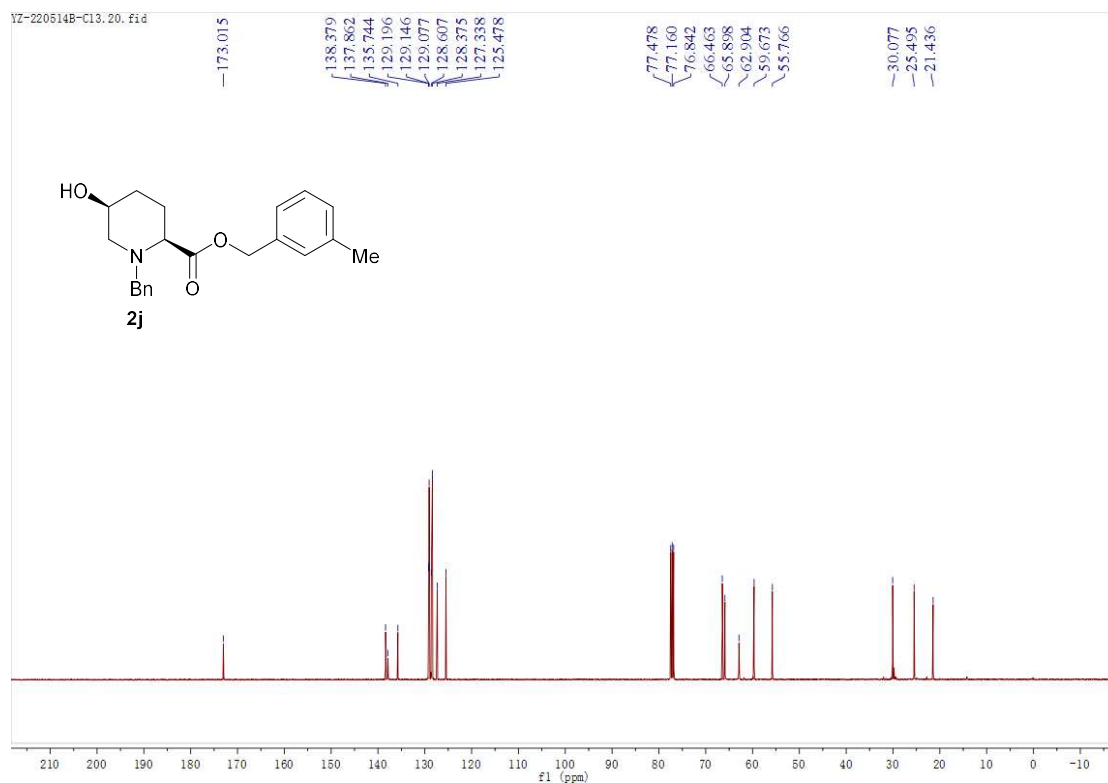

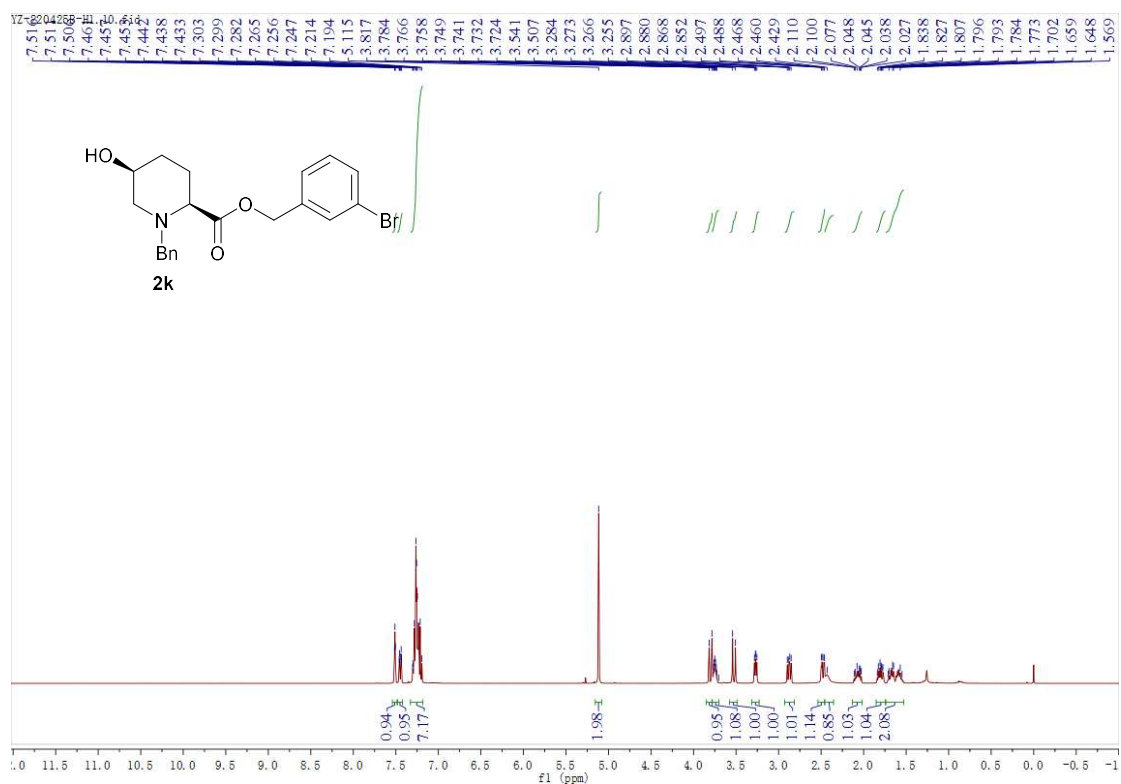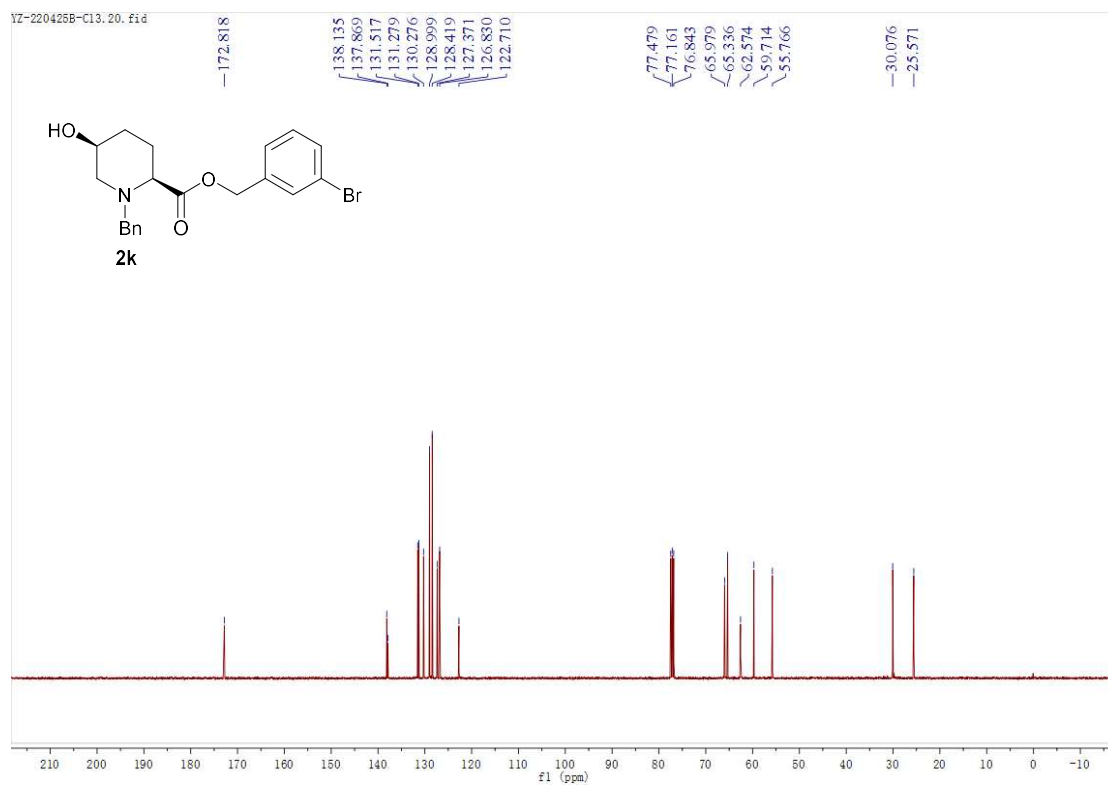



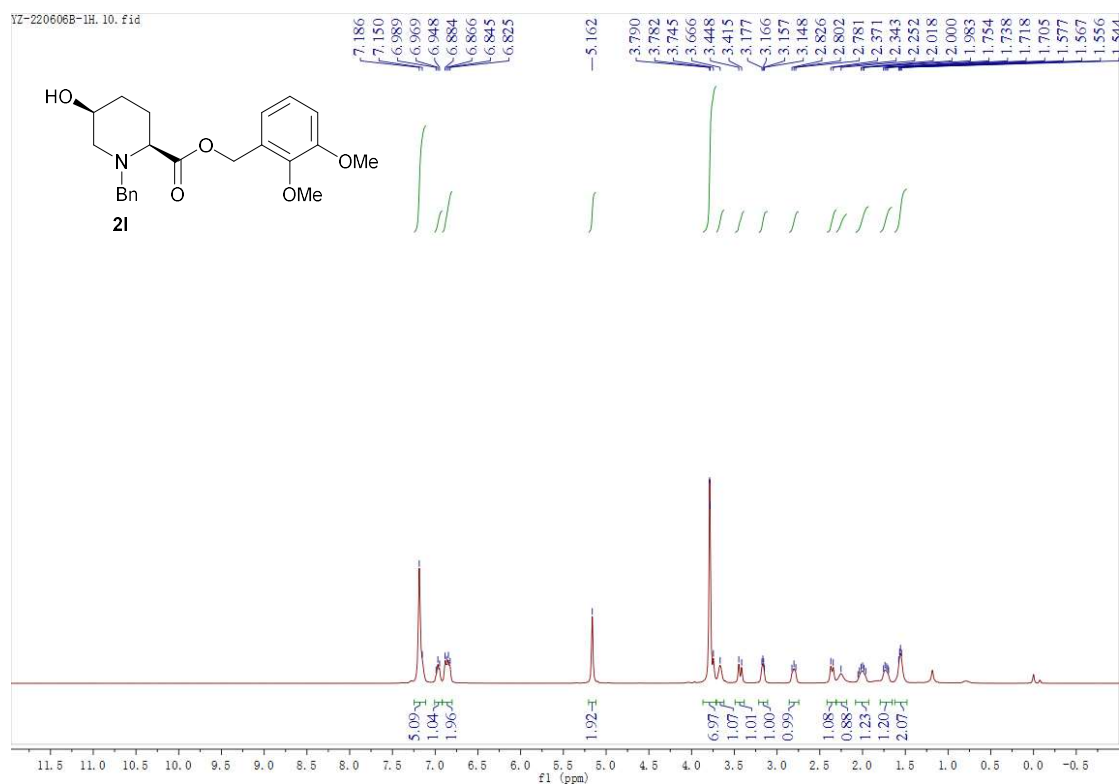

<sup>1</sup>H-NMR Spectrum (400 MHz, Chloroform-*d*) of Compound 2l

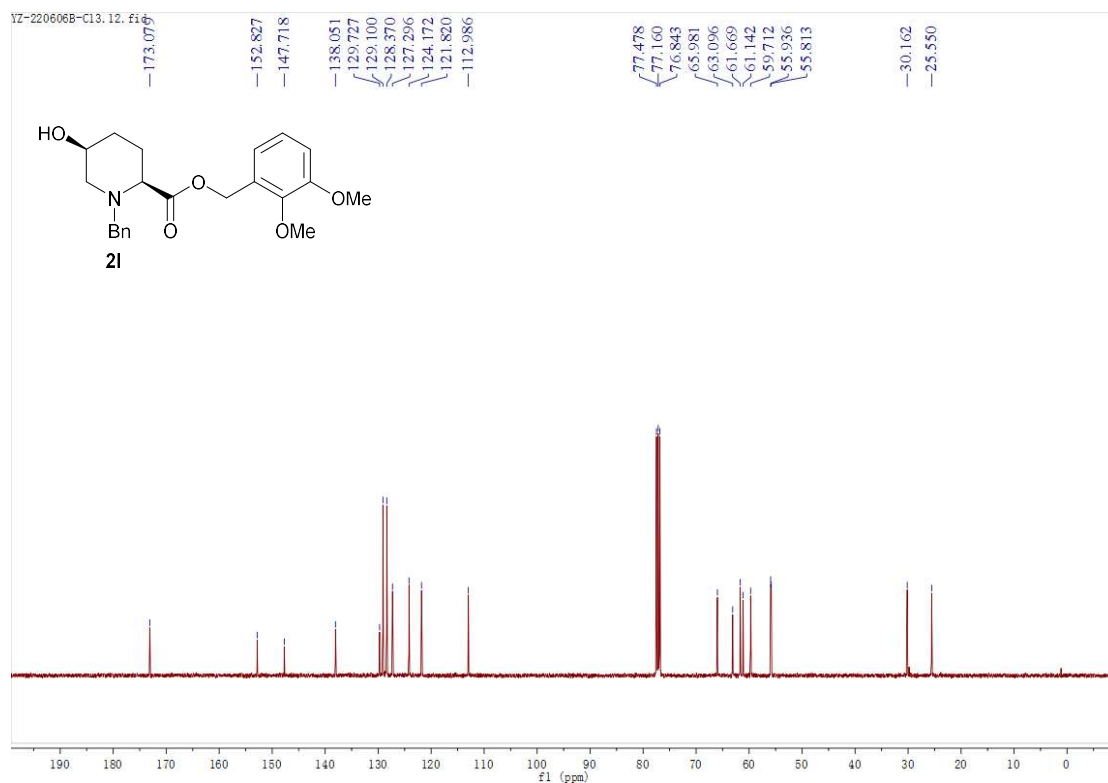

<sup>13</sup>C-NMR Spectrum (100 MHz, Chloroform-*d*) of Compound 2l

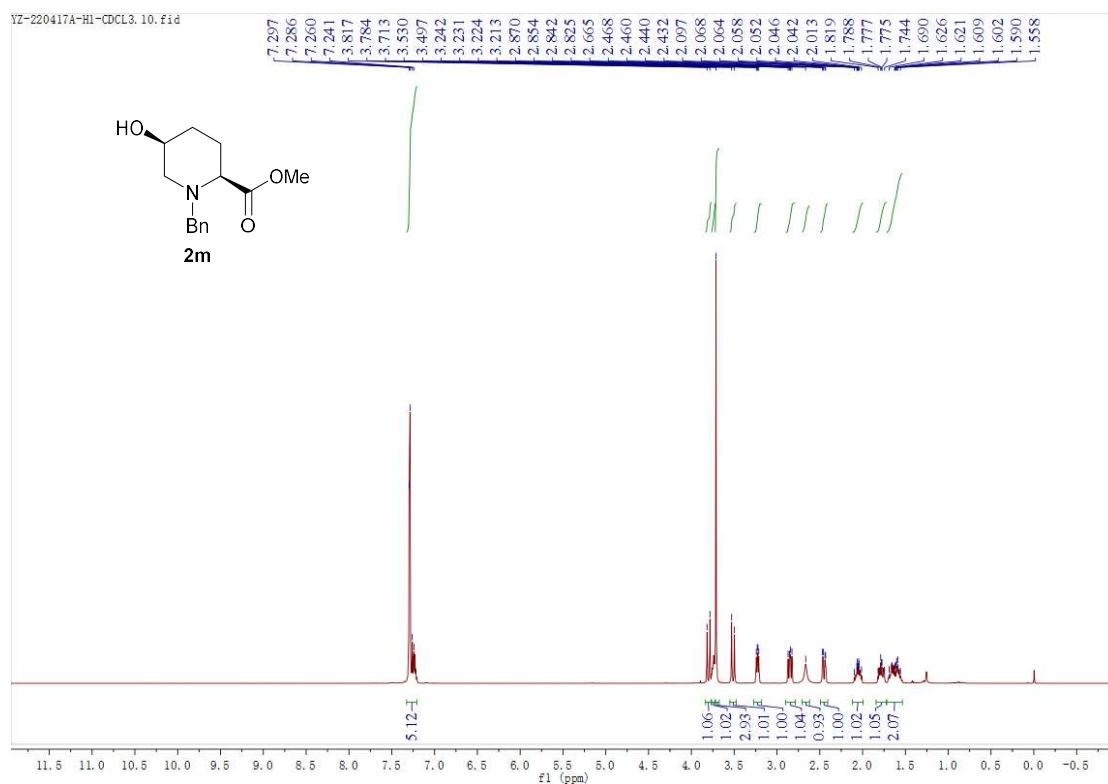

<sup>1</sup>H-NMR Spectrum (400 MHz, Chloroform-*d*) of Compound 2m

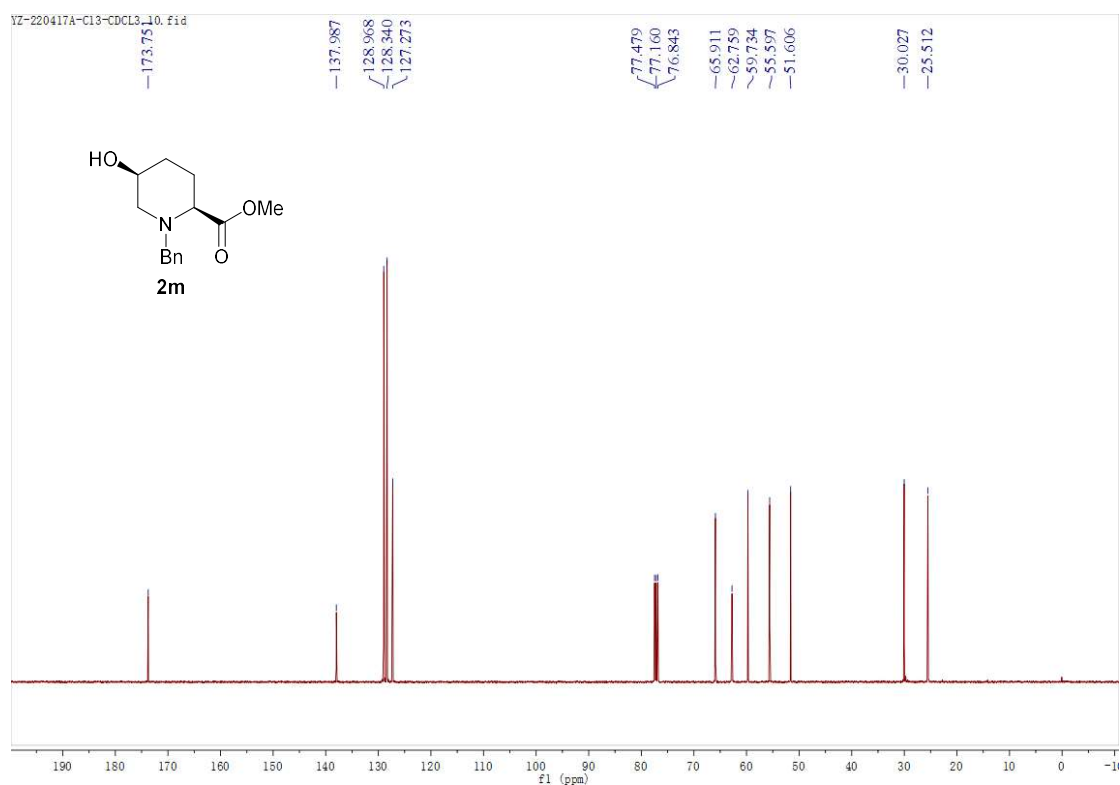

<sup>13</sup>C-NMR Spectrum (100 MHz, Chloroform-*d*) of Compound 2m

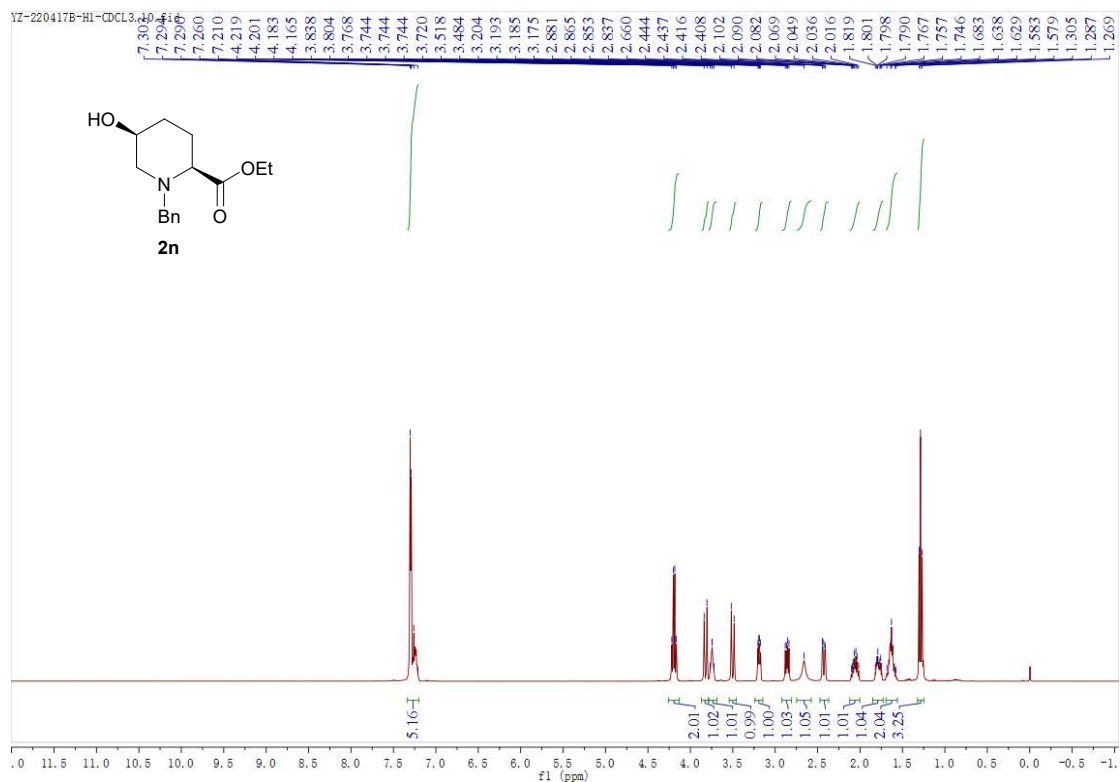

**<sup>1</sup>H-NMR Spectrum (400 MHz, Chloroform-*d*) of Compound 2n**

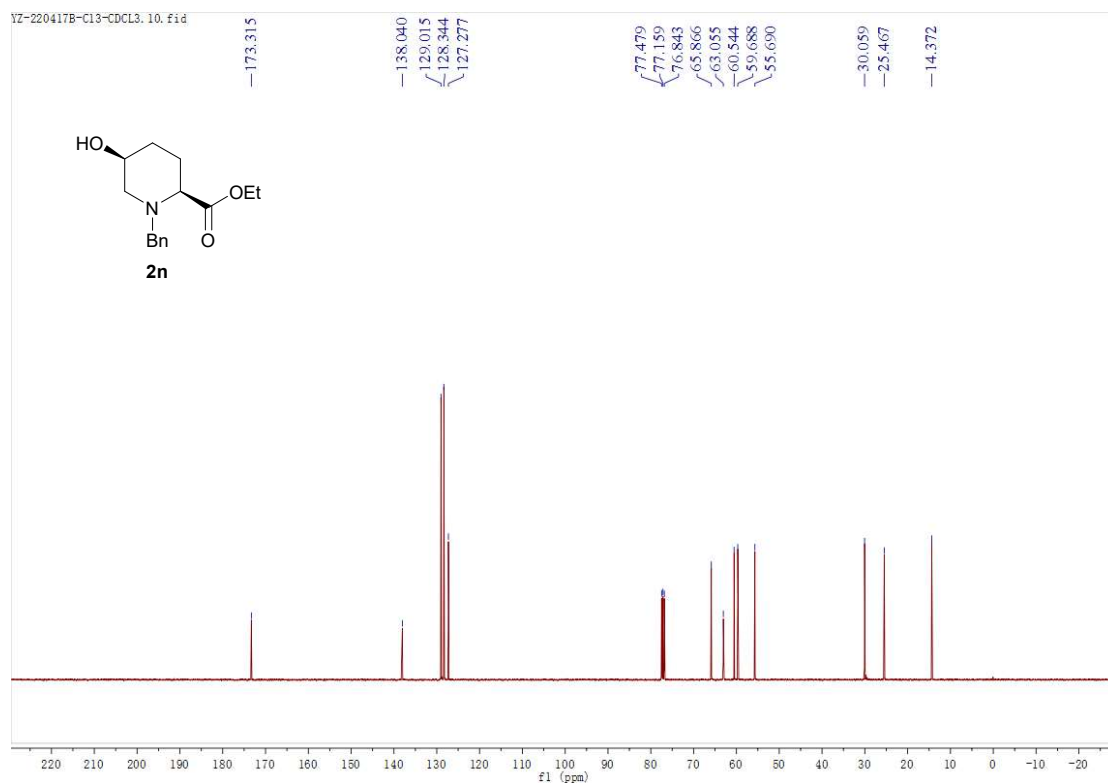

**<sup>13</sup>C-NMR Spectrum (100 MHz, Chloroform-*d*) of Compound 2n**

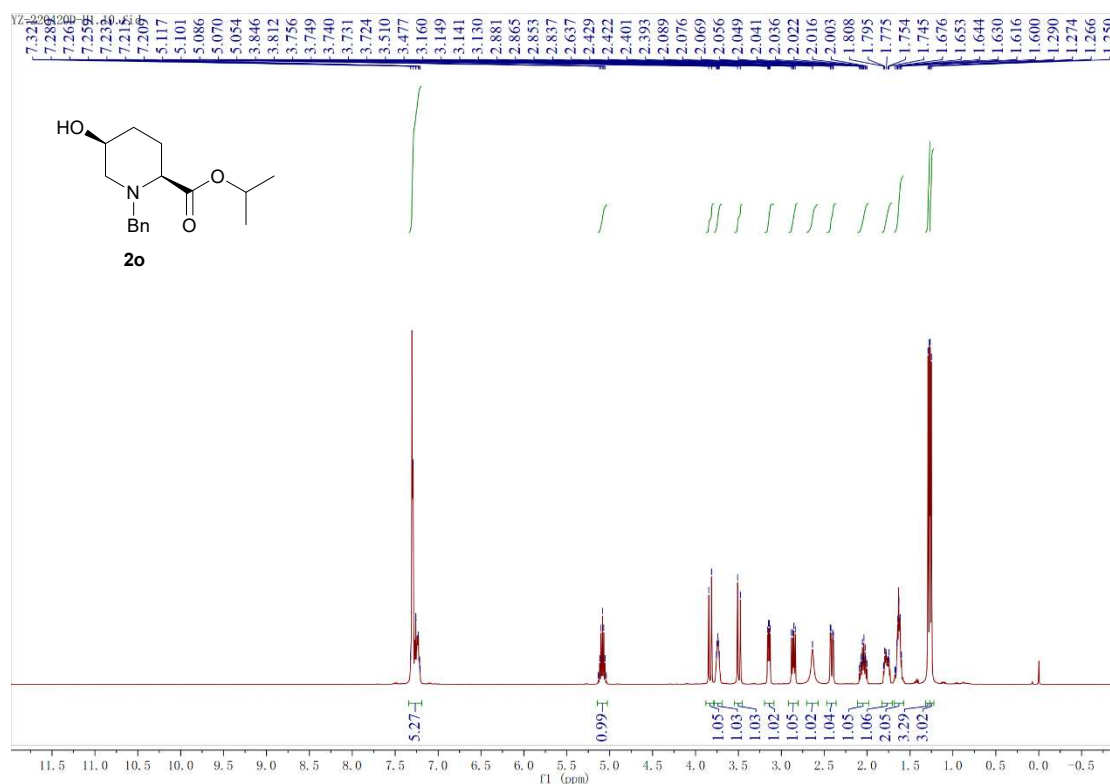

**<sup>1</sup>H-NMR Spectrum (400 MHz, Chloroform-d) of Compound 2o**

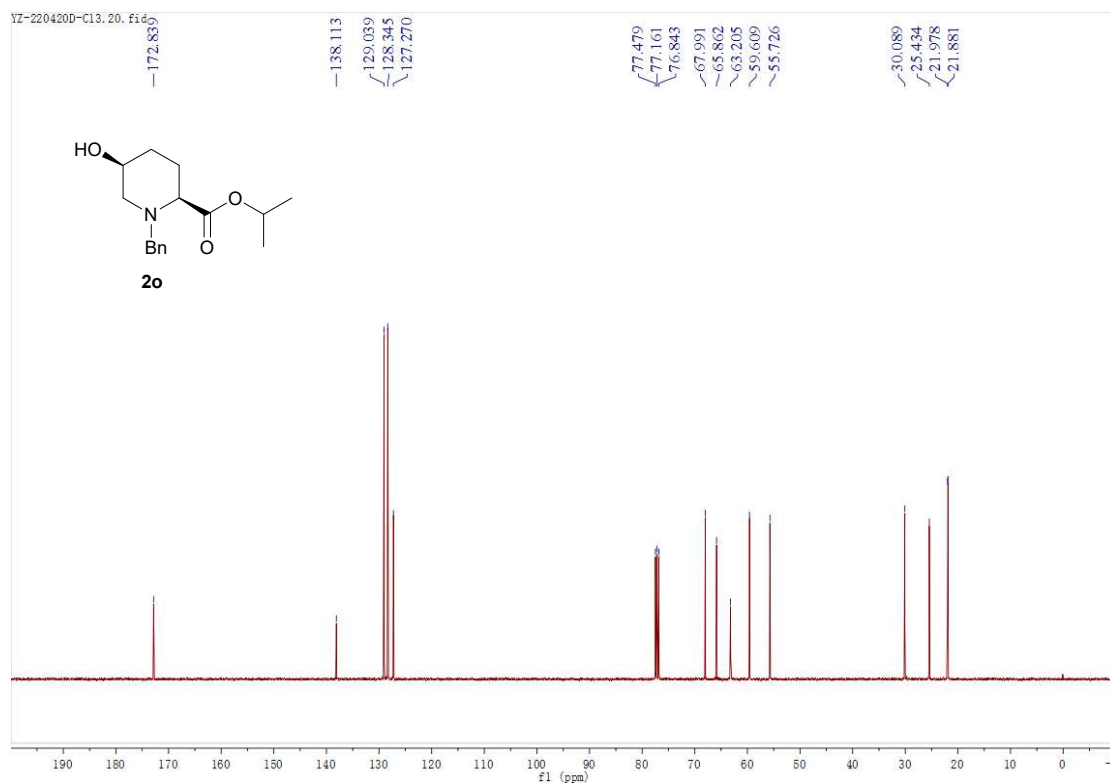

**<sup>13</sup>C-NMR Spectrum (100 MHz, Chloroform-d) of Compound 2o**

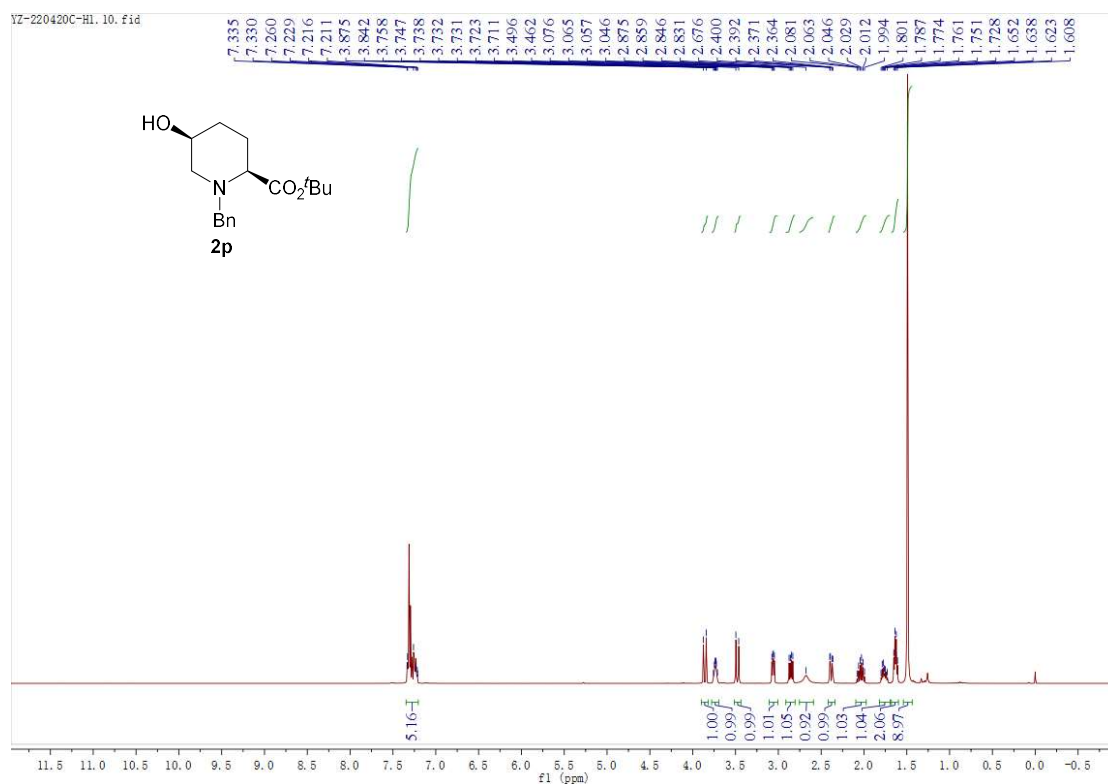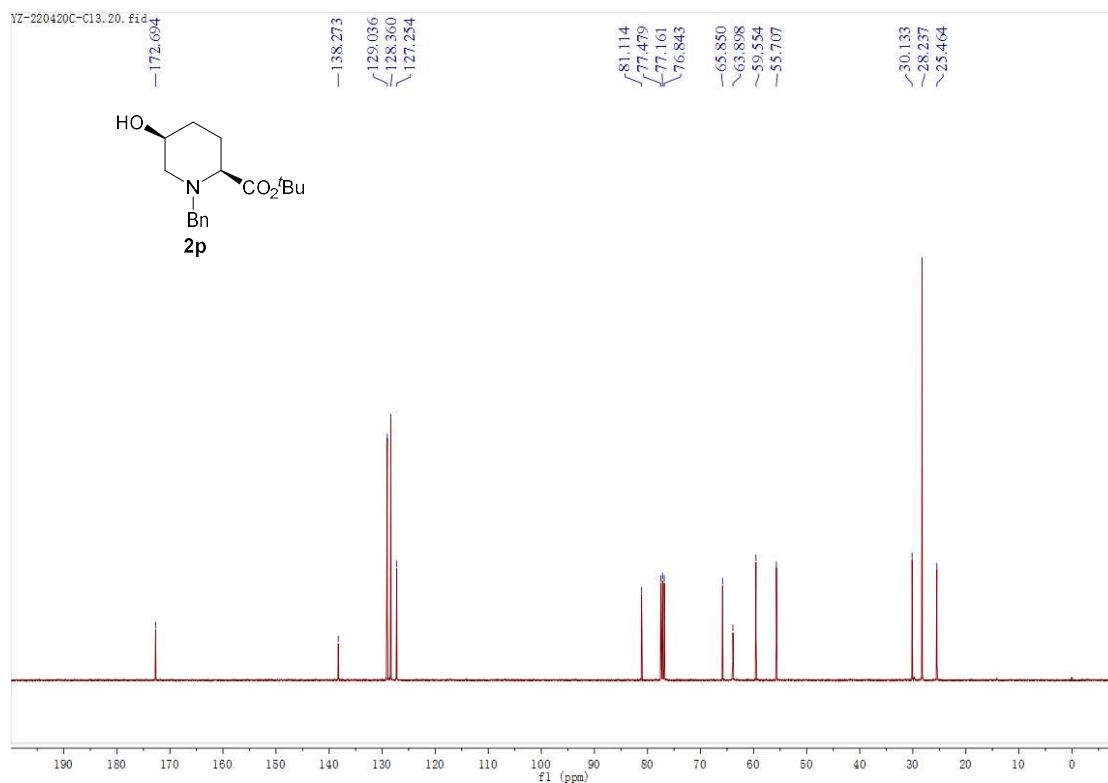

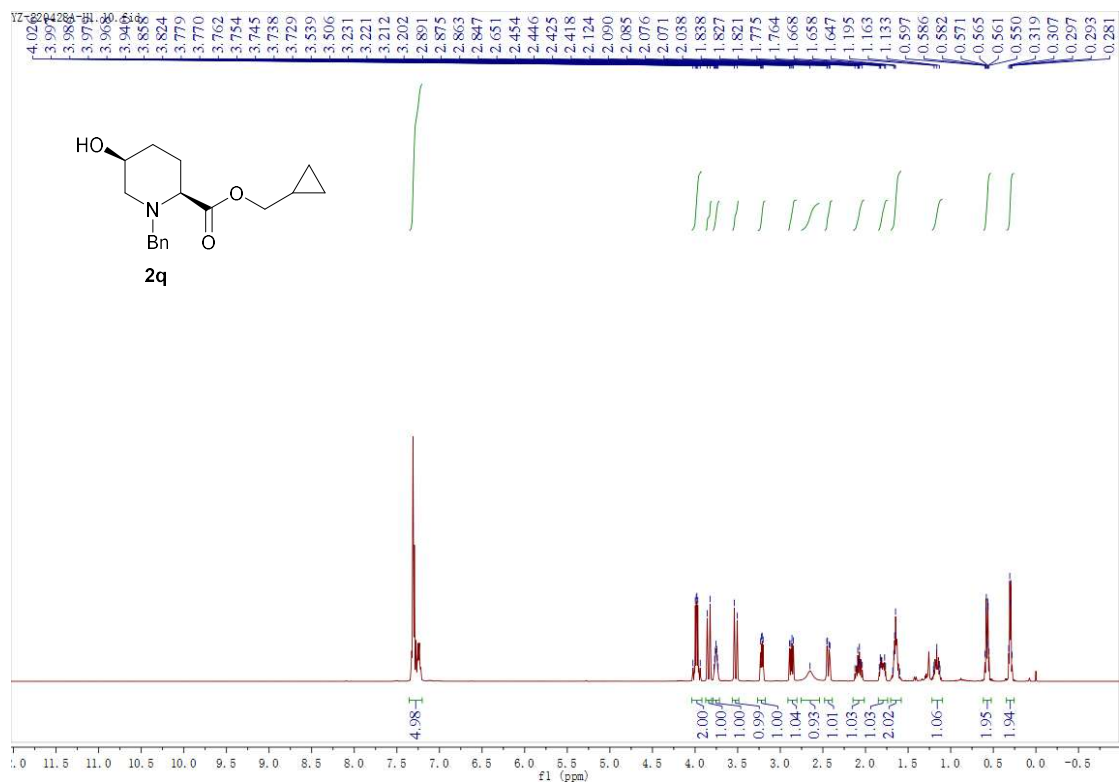

<sup>1</sup>H-NMR Spectrum (400 MHz, Chloroform-*d*) of Compound 2q

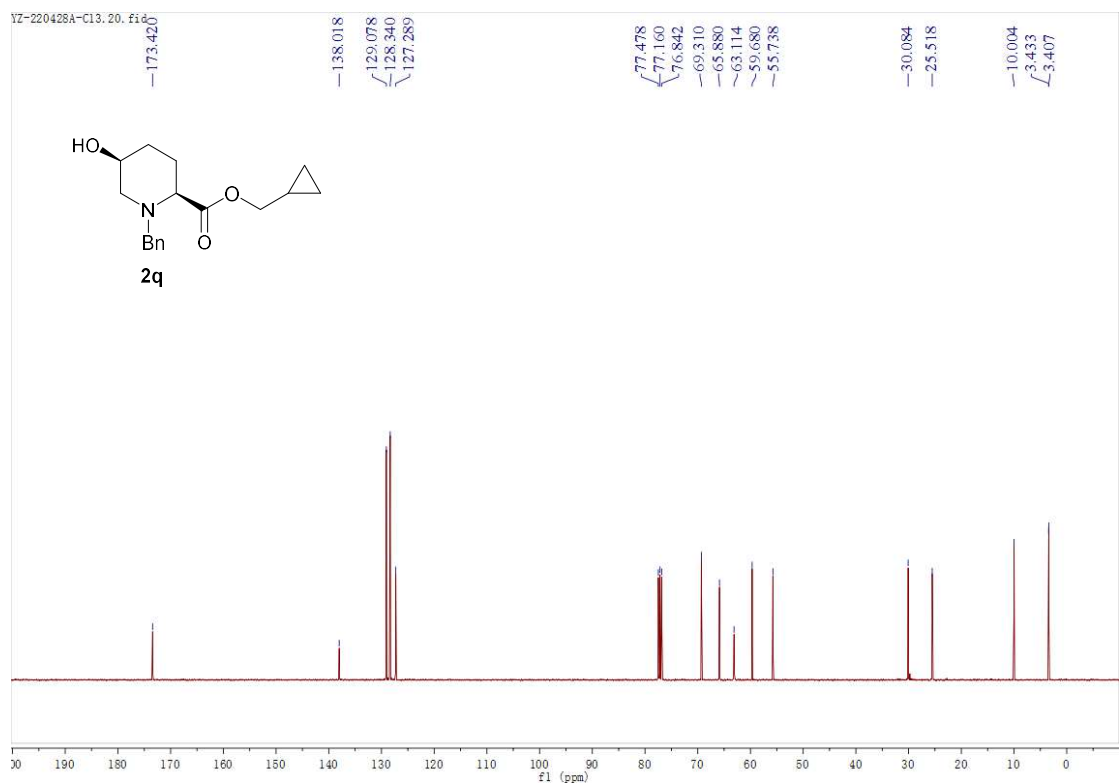

<sup>13</sup>C-NMR Spectrum (100 MHz, Chloroform-*d*) of Compound 2q

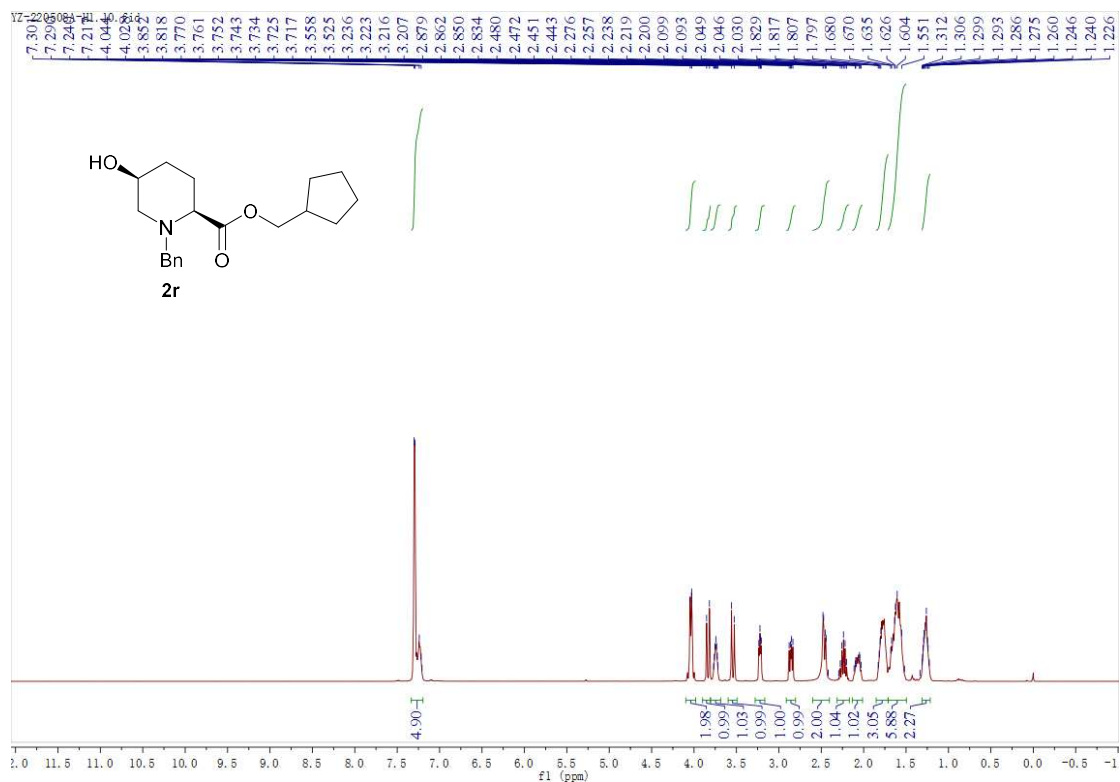

**<sup>1</sup>H-NMR Spectrum (400 MHz, Chloroform-*d*) of Compound 2r**

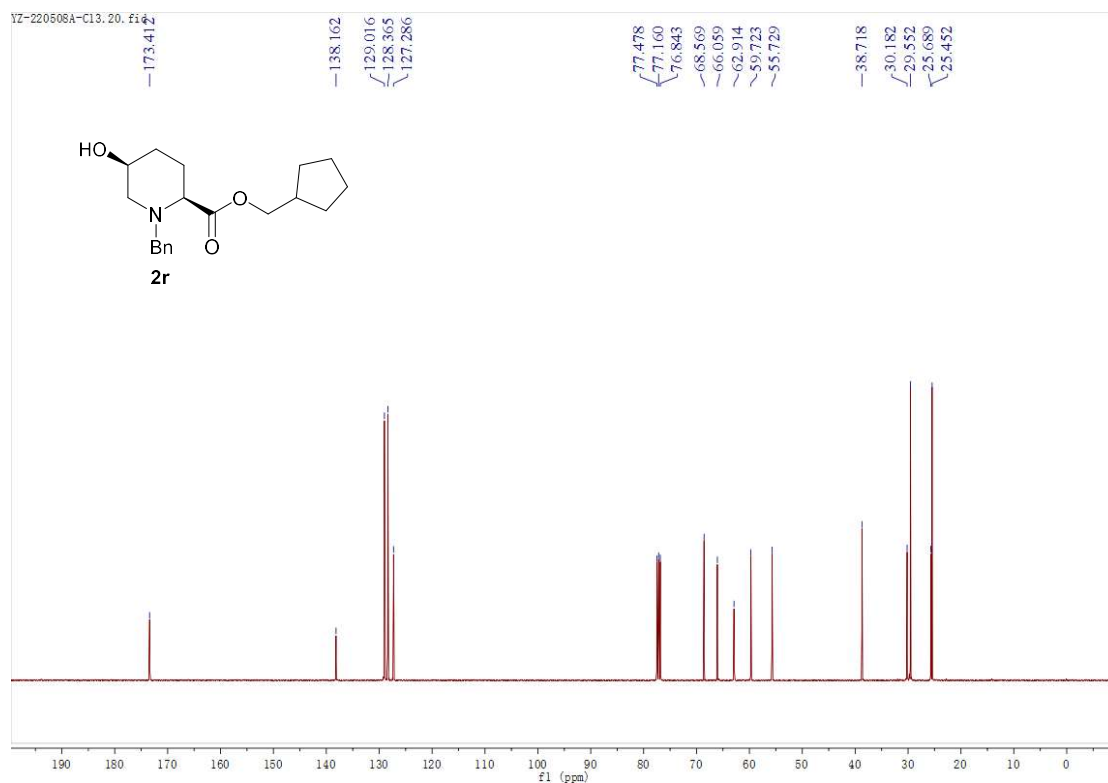

**<sup>13</sup>C-NMR Spectrum (100 MHz, Chloroform-*d*) of Compound 2r**

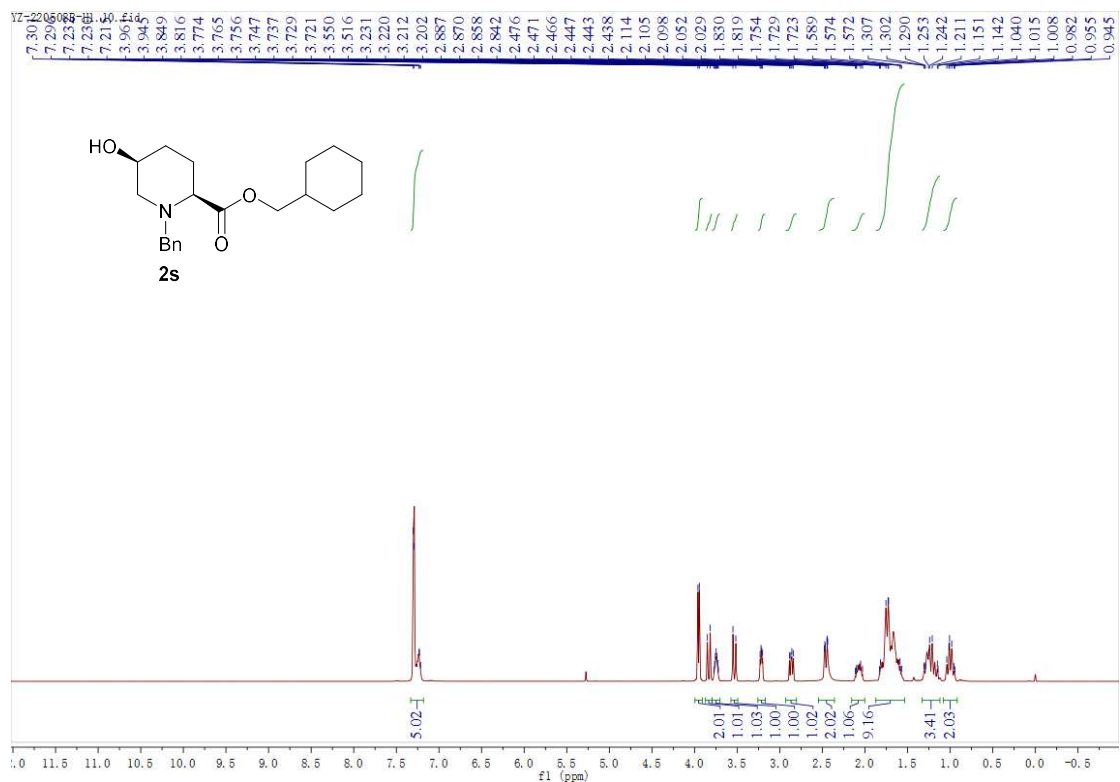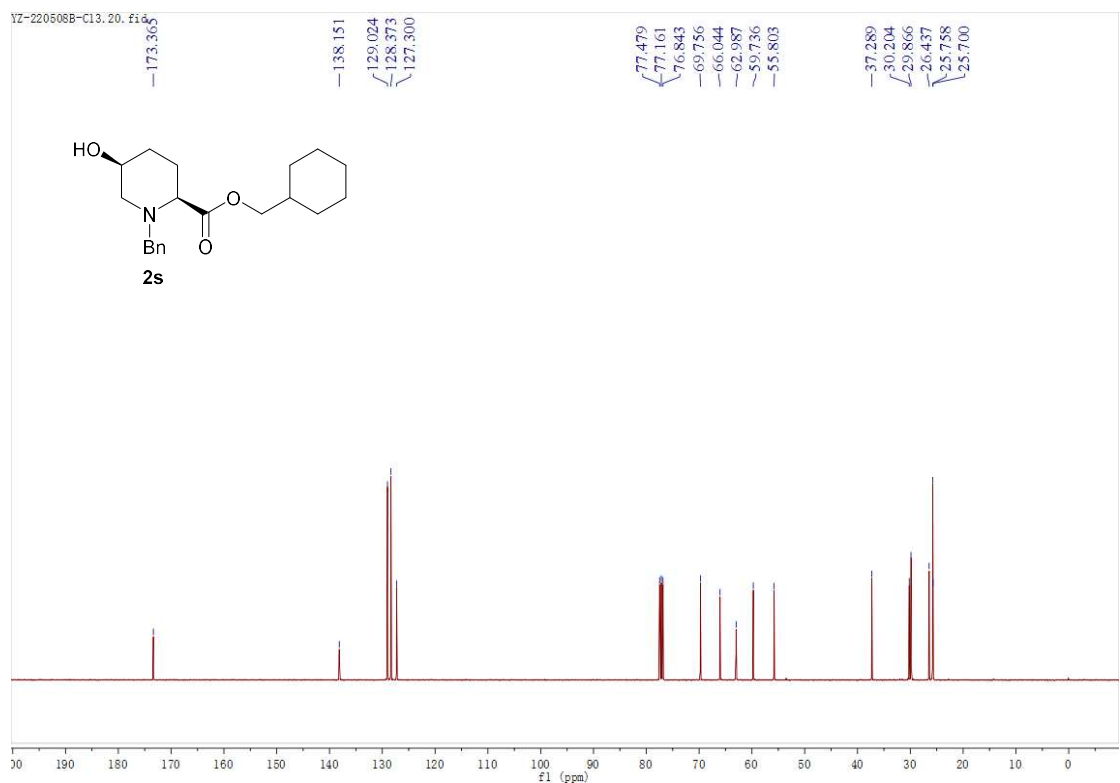



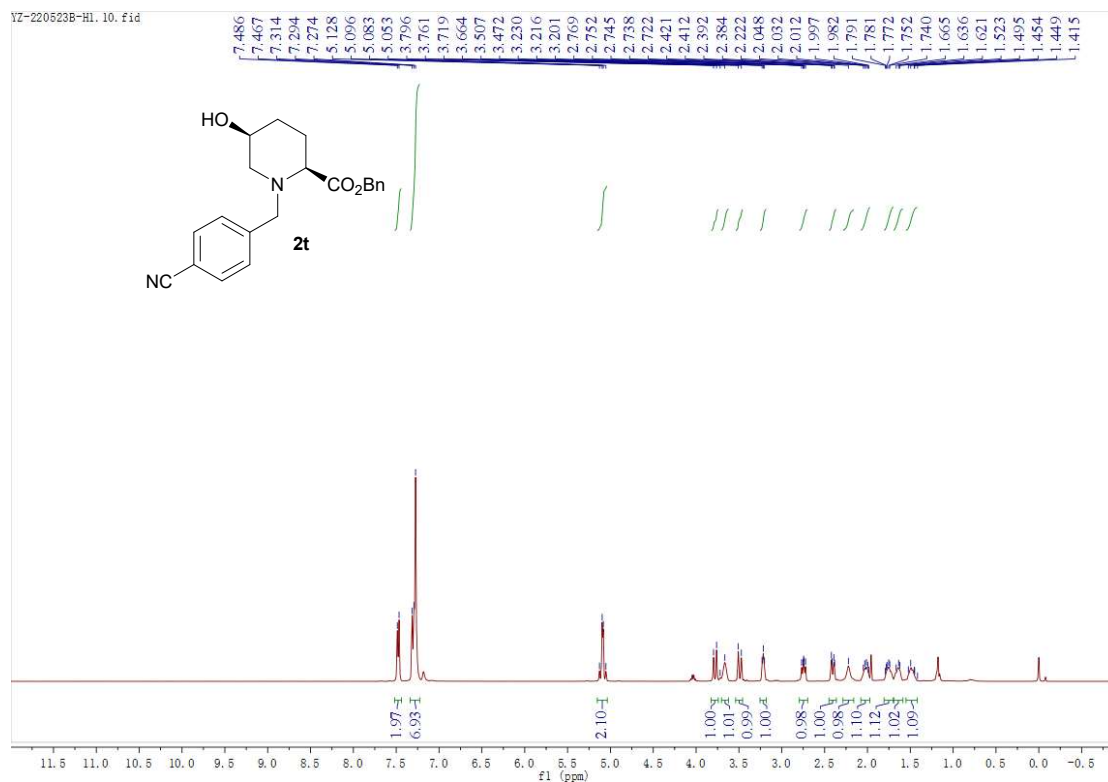

**<sup>1</sup>H-NMR Spectrum (400 MHz, Chloroform-*d*) of Compound 2t**

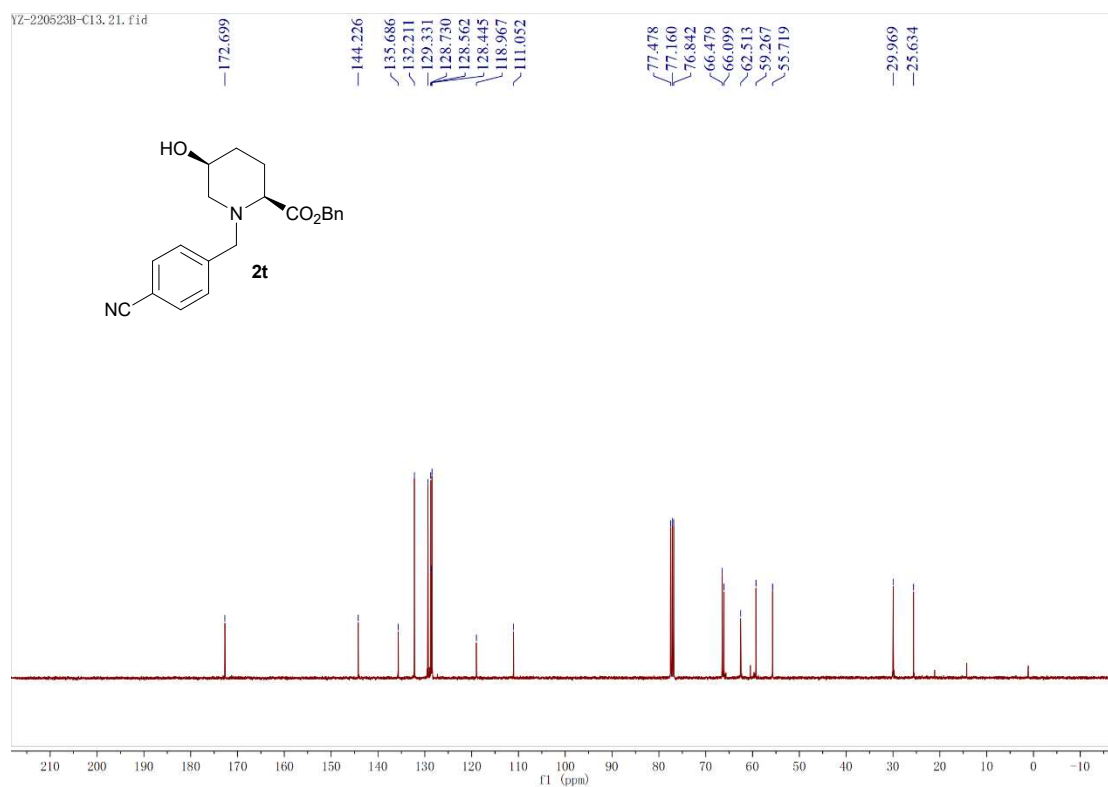

**<sup>13</sup>C-NMR Spectrum (100 MHz, Chloroform-*d*) of Compound 2t**

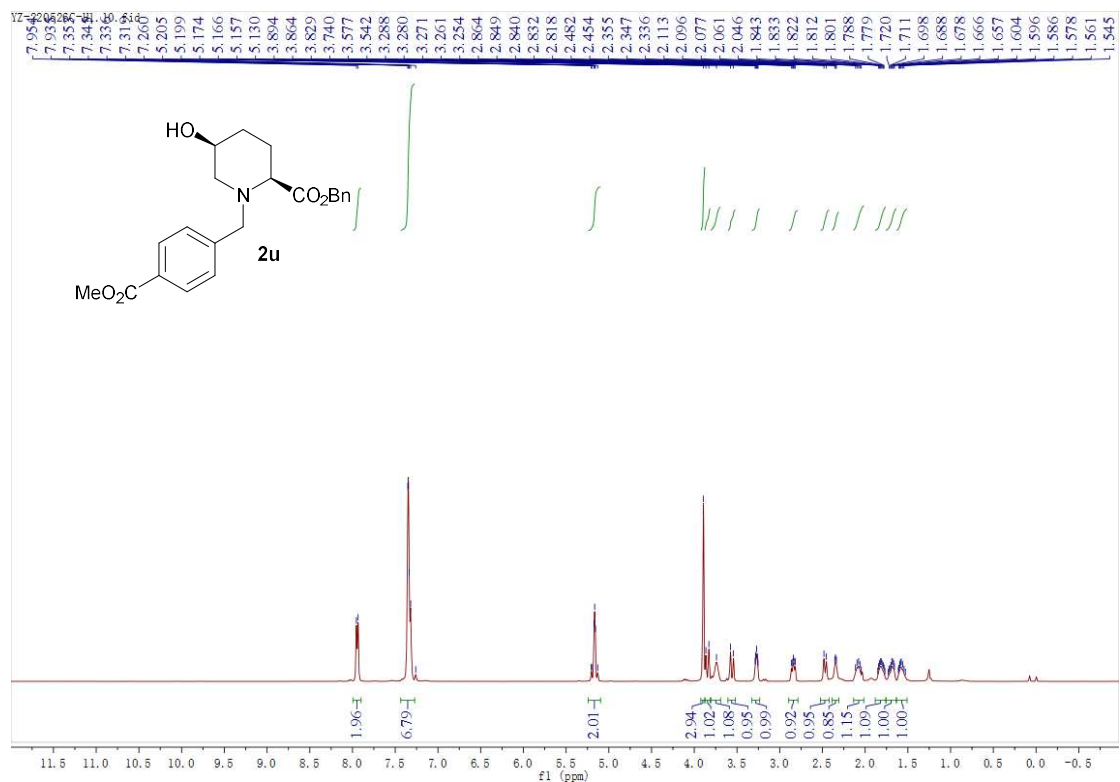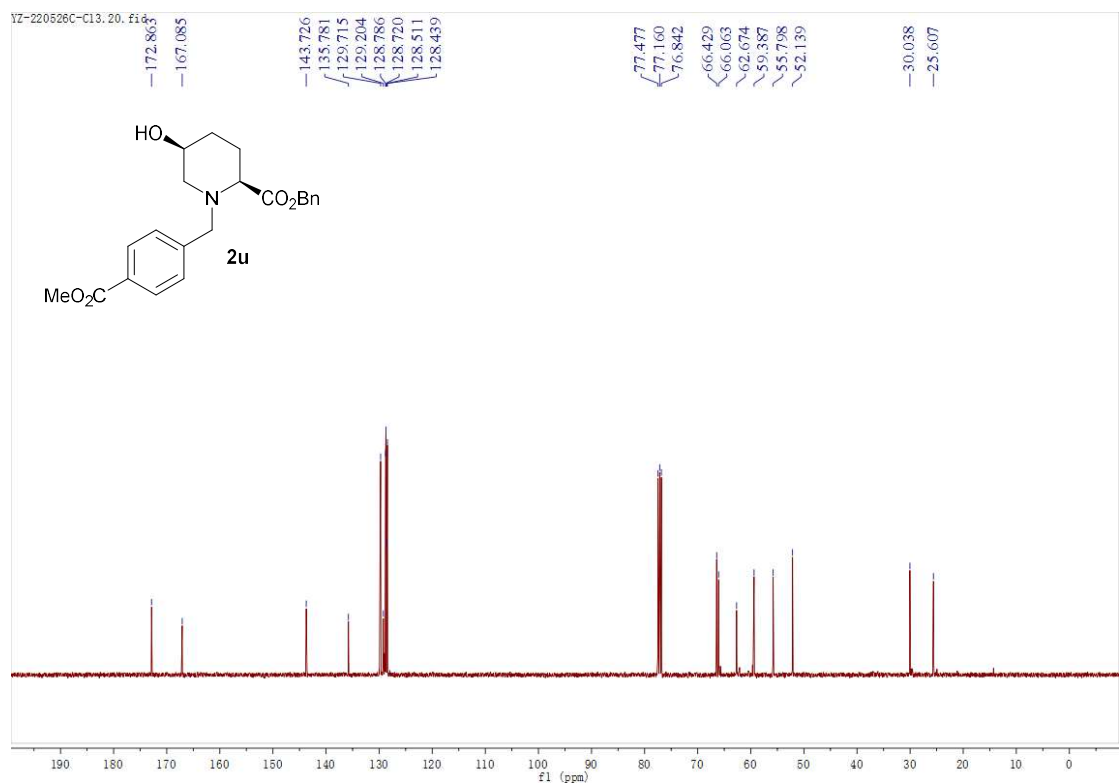

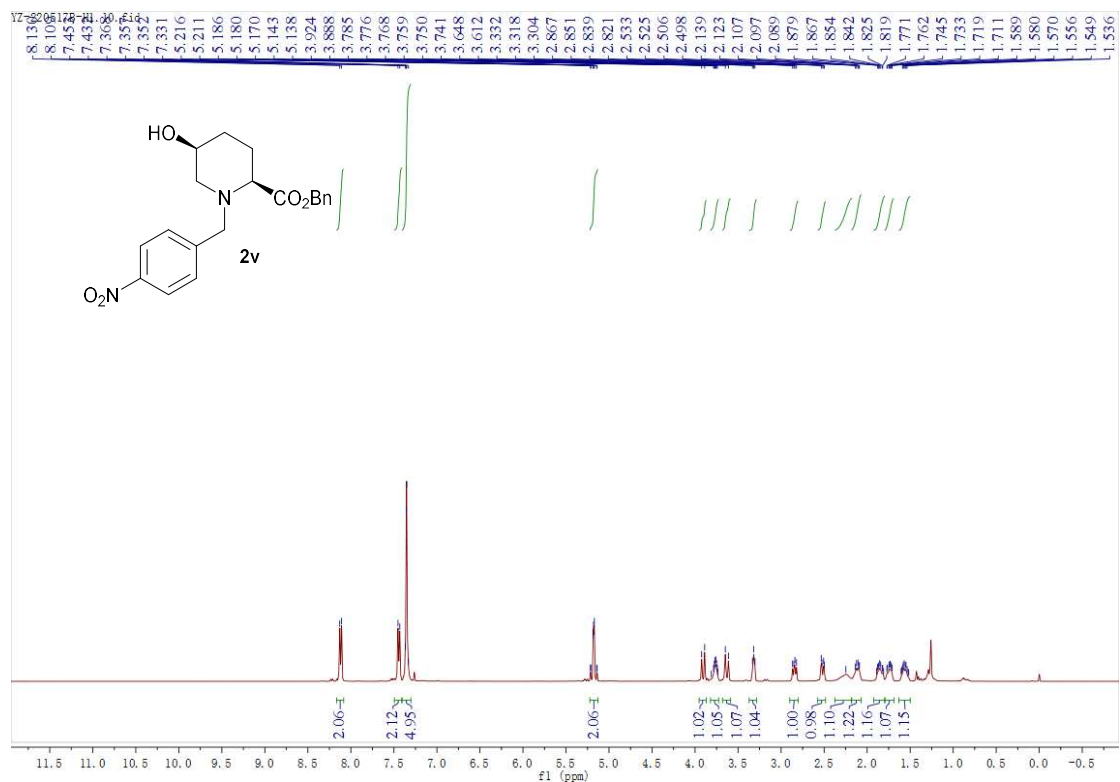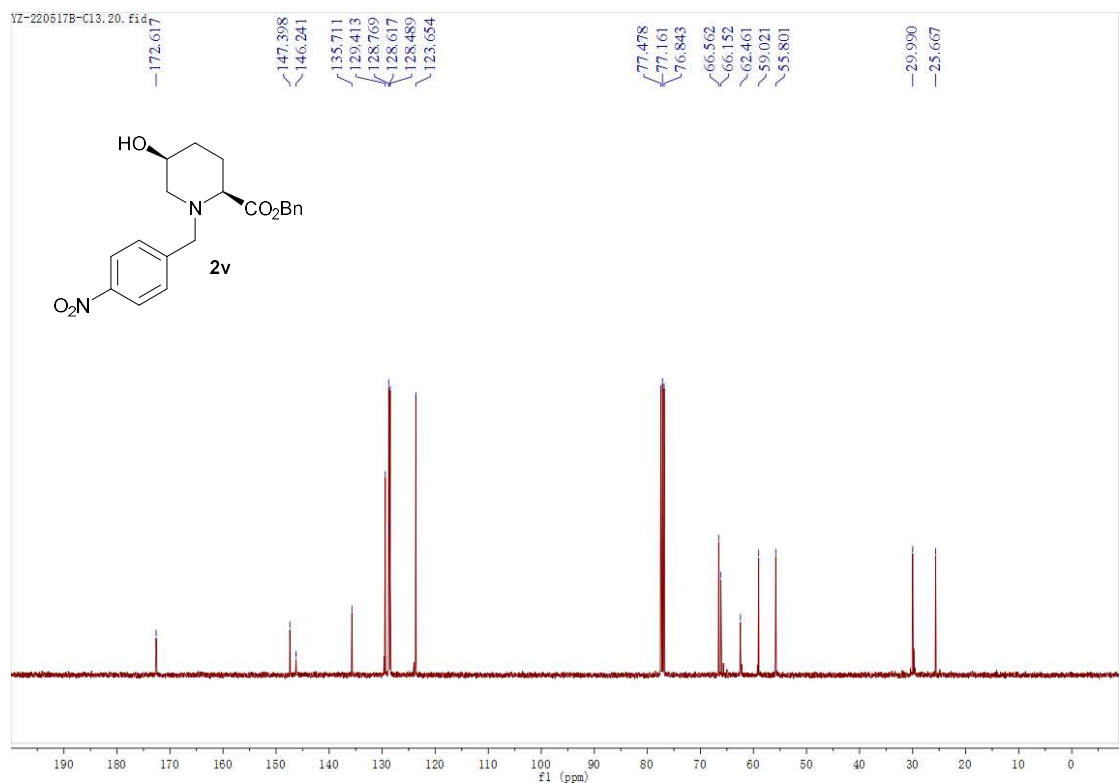

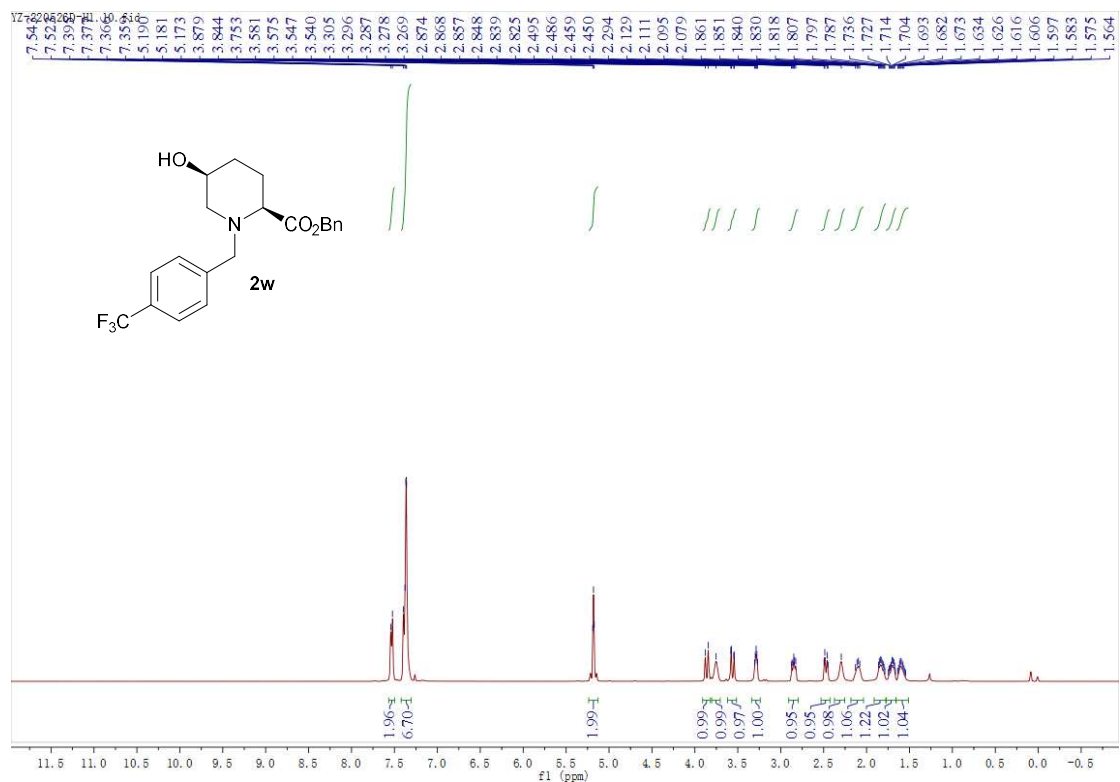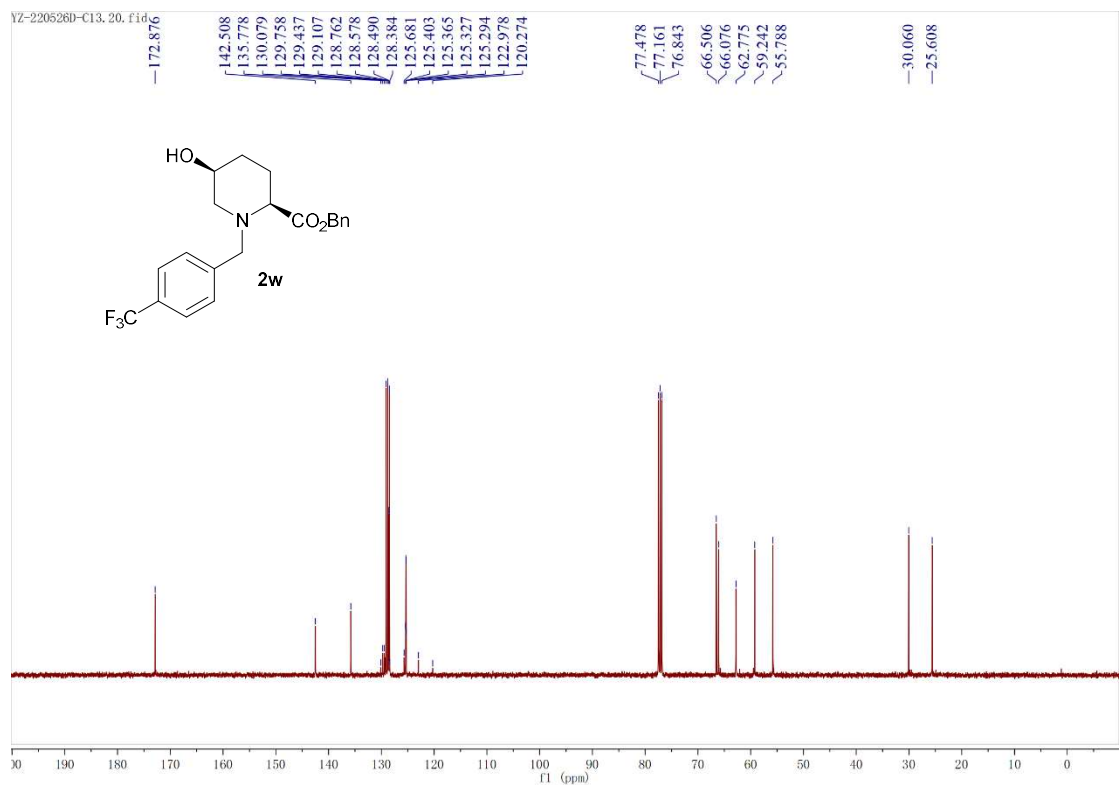

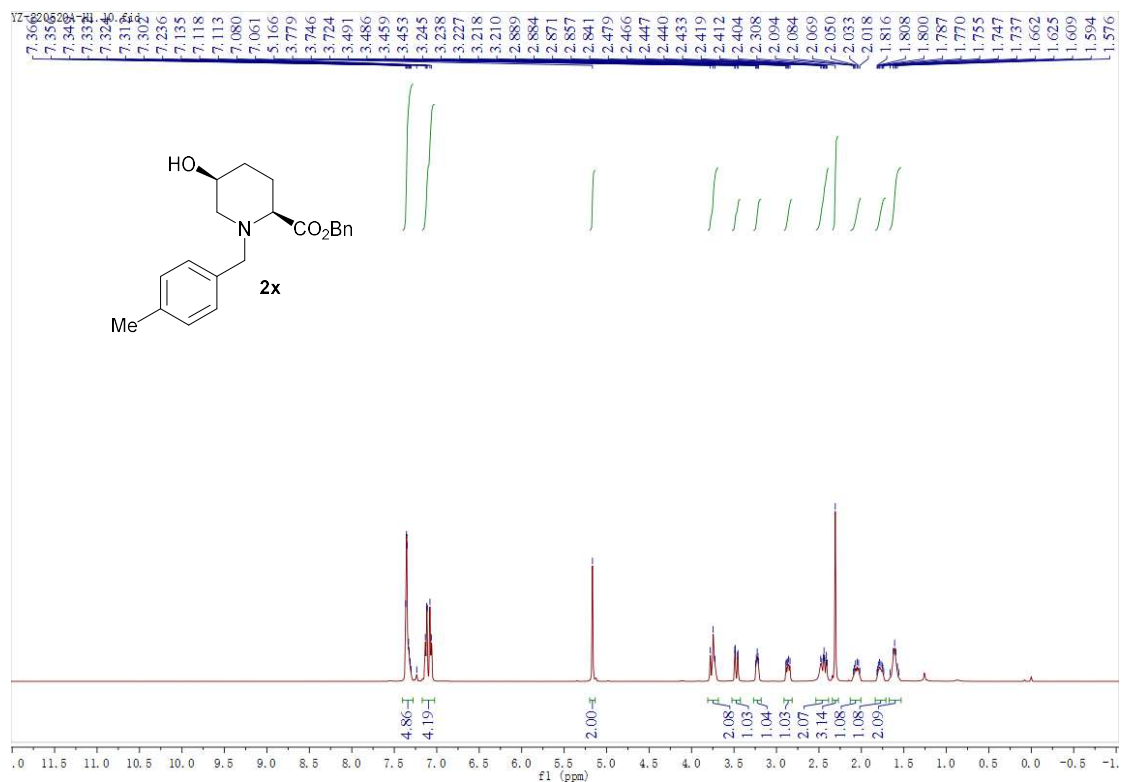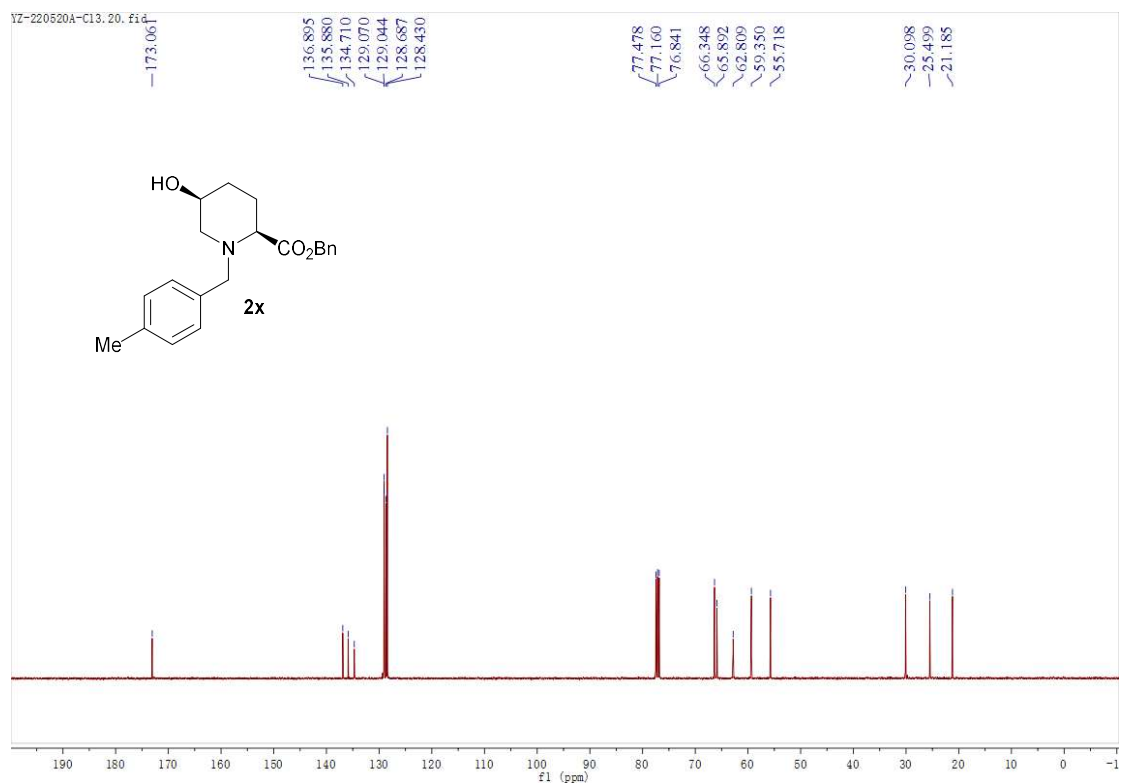

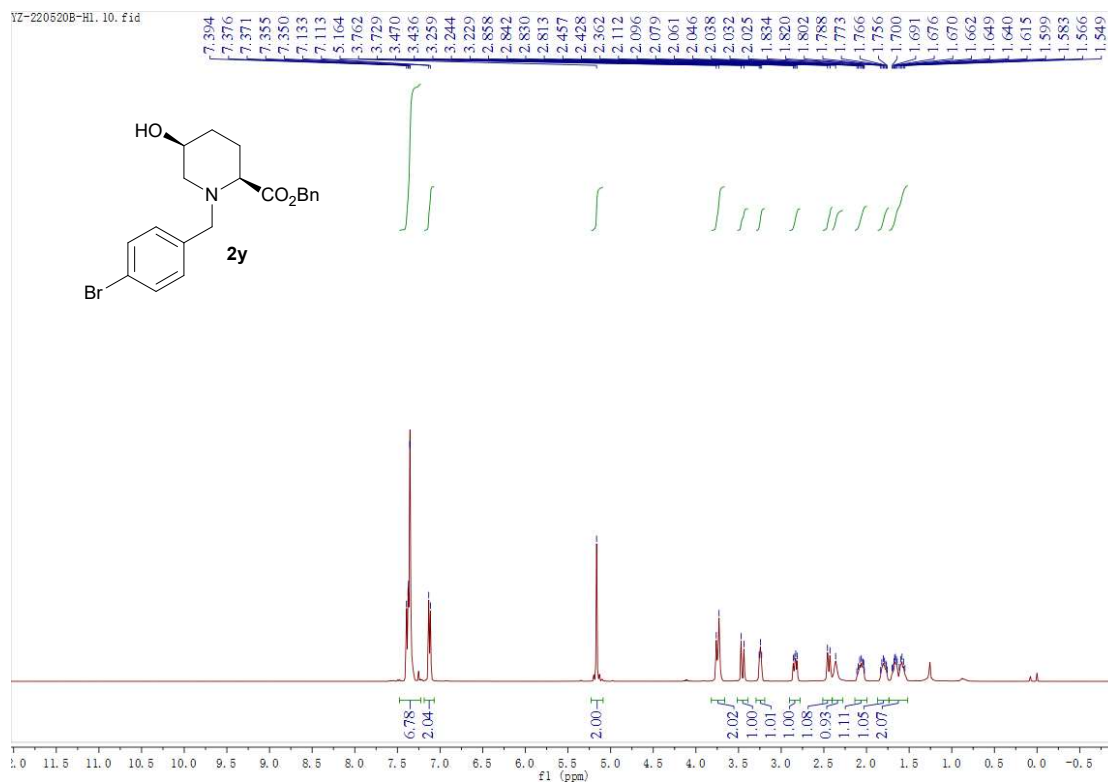

<sup>1</sup>H-NMR Spectrum (400 MHz, Chloroform-*d*) of Compound 2y

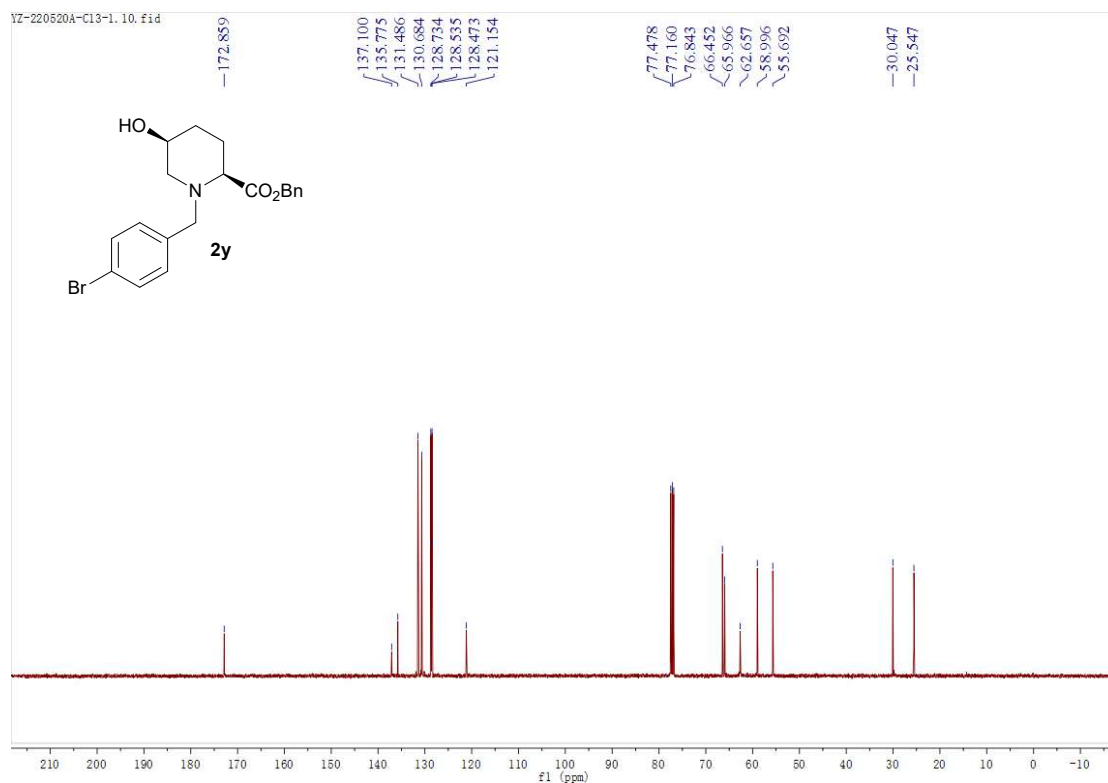

<sup>13</sup>C-NMR Spectrum (100 MHz, Chloroform-*d*) of Compound 2y

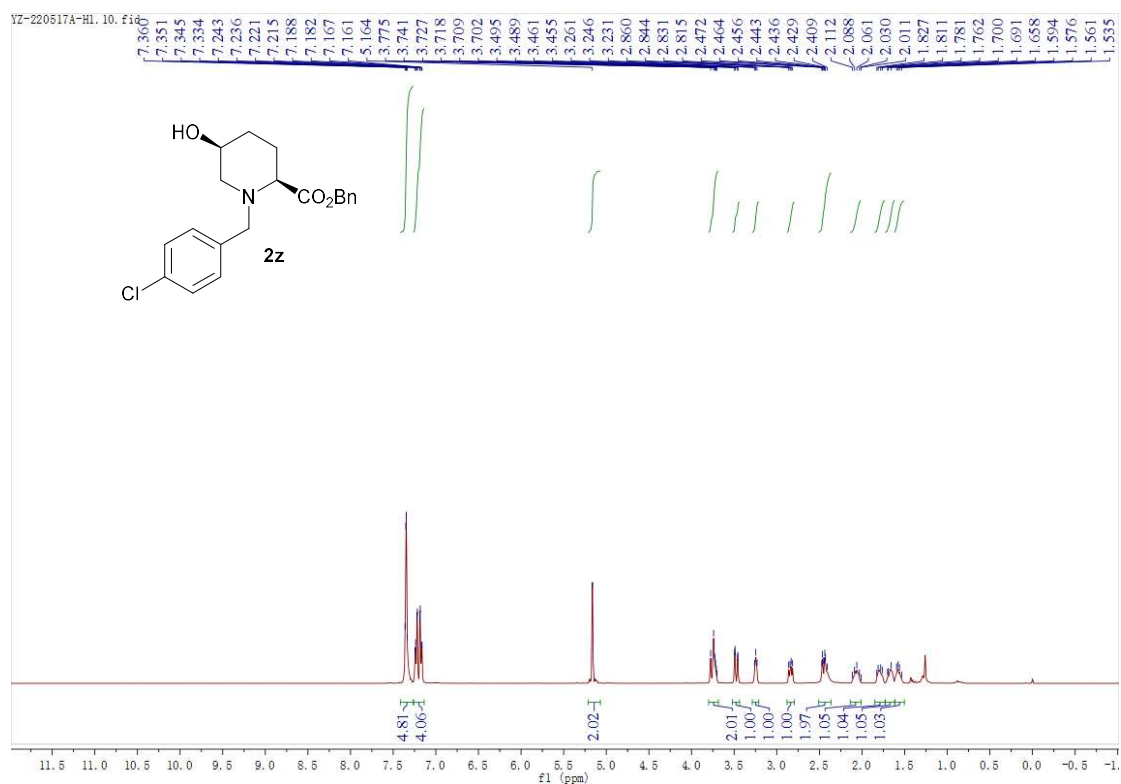

<sup>1</sup>H-NMR Spectrum (400 MHz, Chloroform-*d*) of Compound 2z

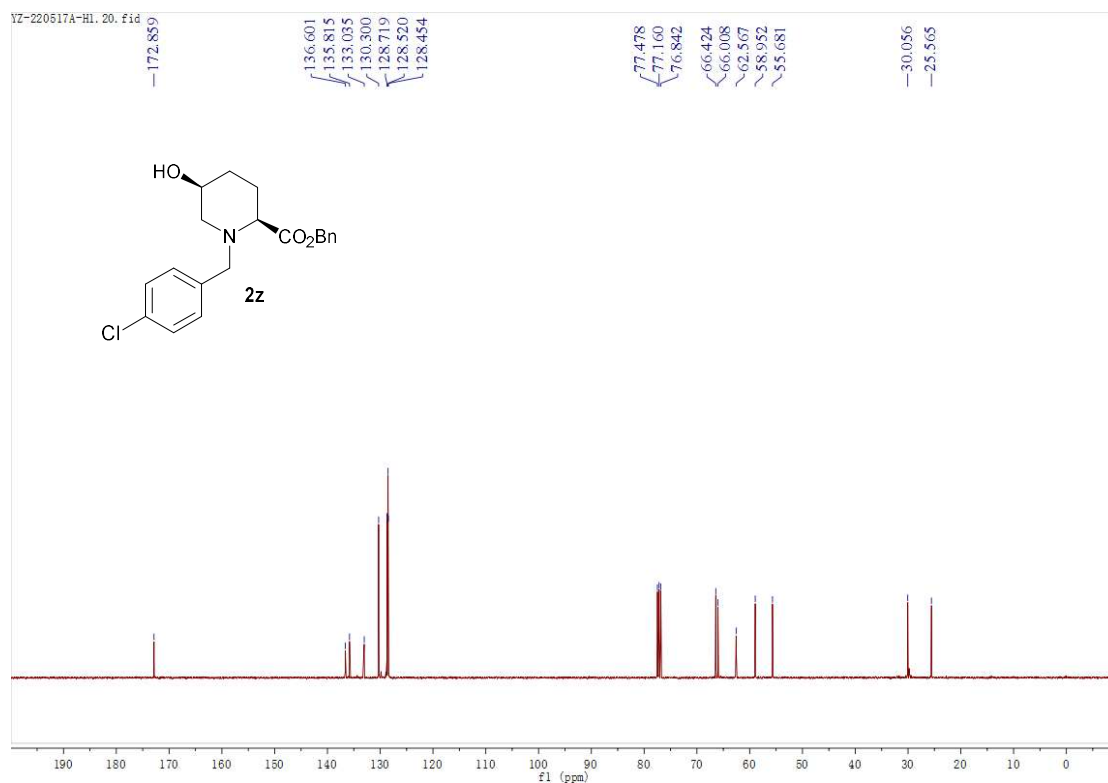

<sup>13</sup>C-NMR Spectrum (100 MHz, Chloroform-*d*) of Compound 2z

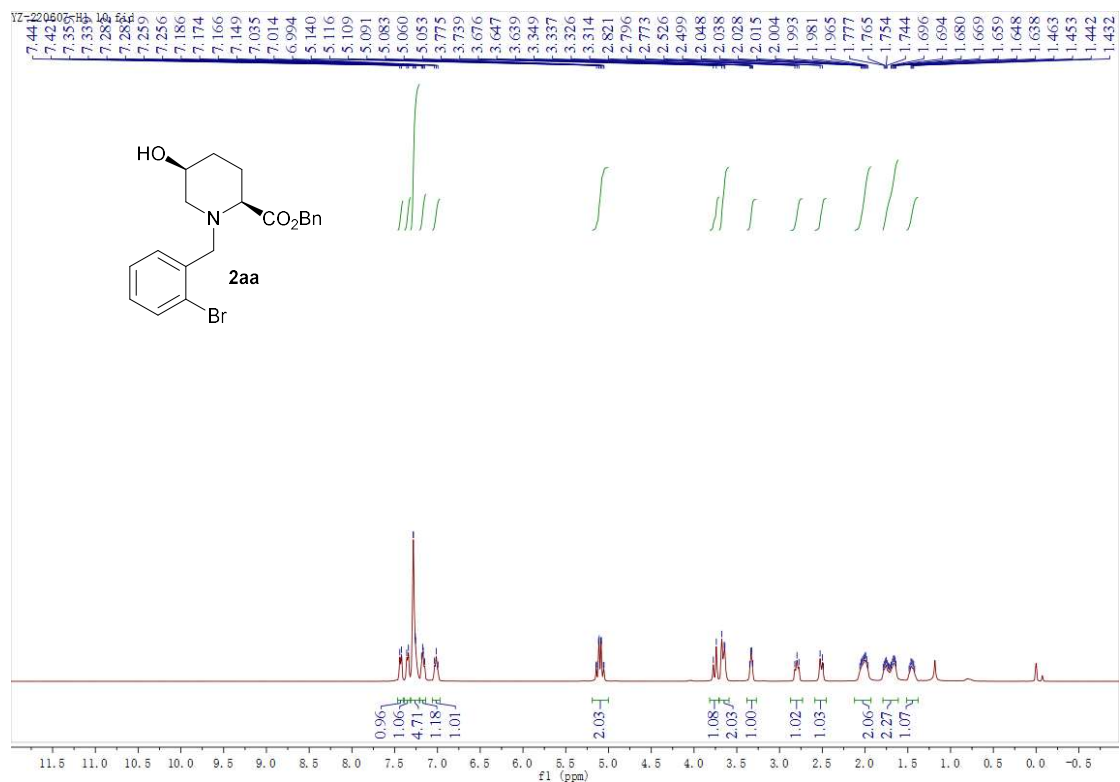

**<sup>1</sup>H-NMR Spectrum (400 MHz, Chloroform-*d*) of Compound 2aa**

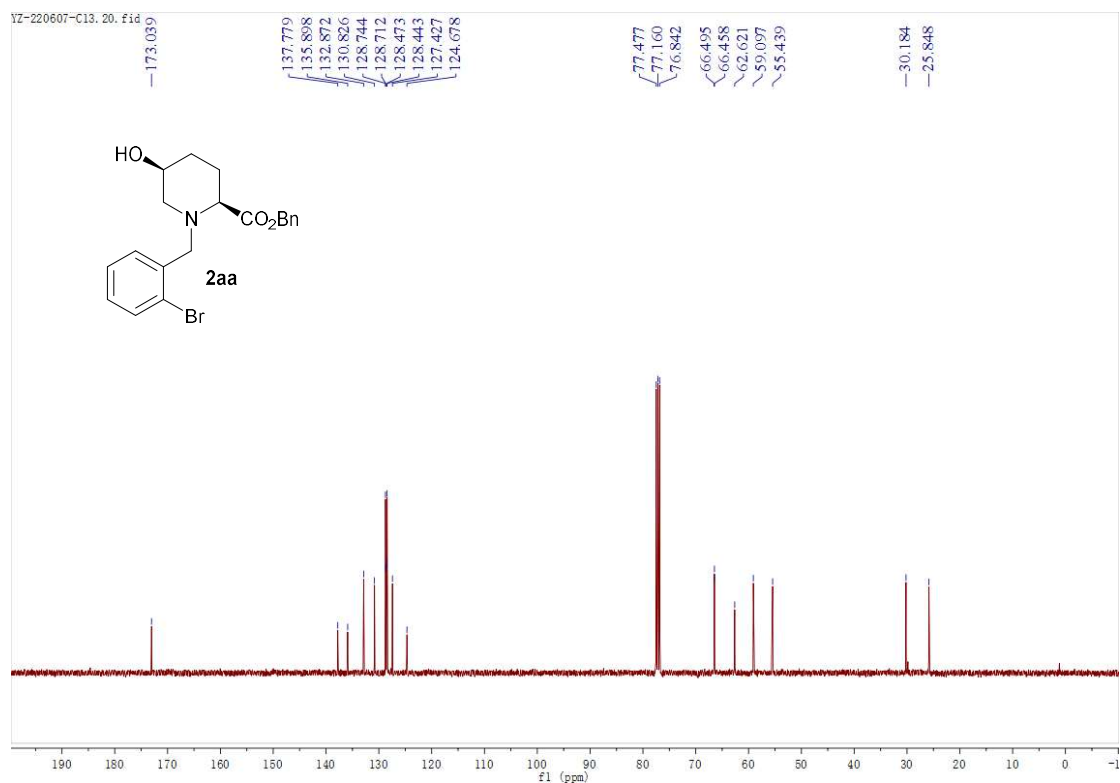

**<sup>13</sup>C-NMR Spectrum (100 MHz, Chloroform-*d*) of Compound 2aa**



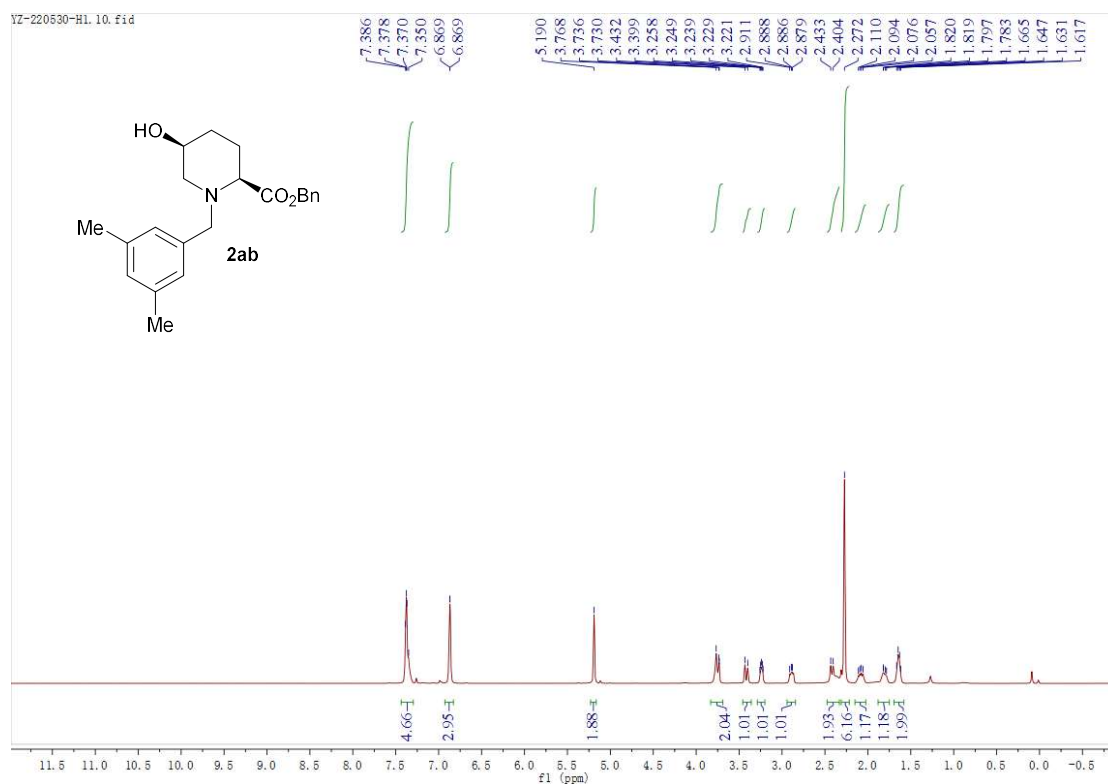

**<sup>1</sup>H-NMR Spectrum (400 MHz, Chloroform-*d*) of Compound 2ab**

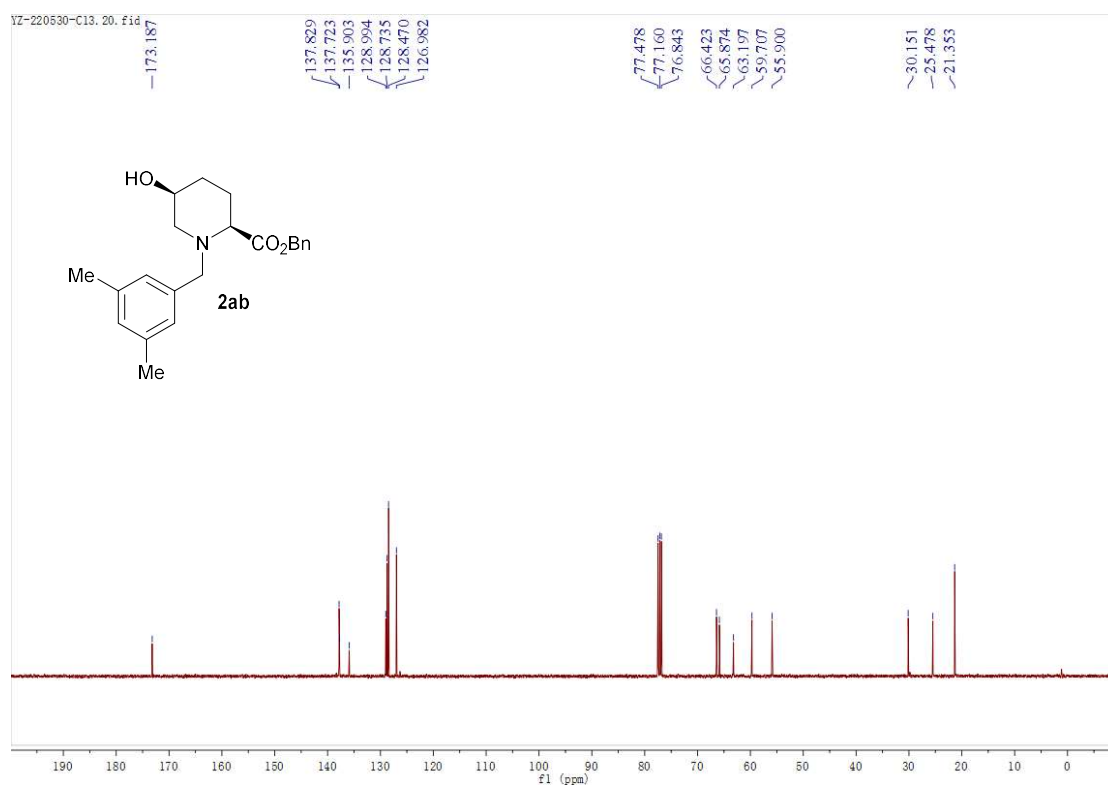

**<sup>13</sup>C-NMR Spectrum (100 MHz, Chloroform-*d*) of Compound 2ab**

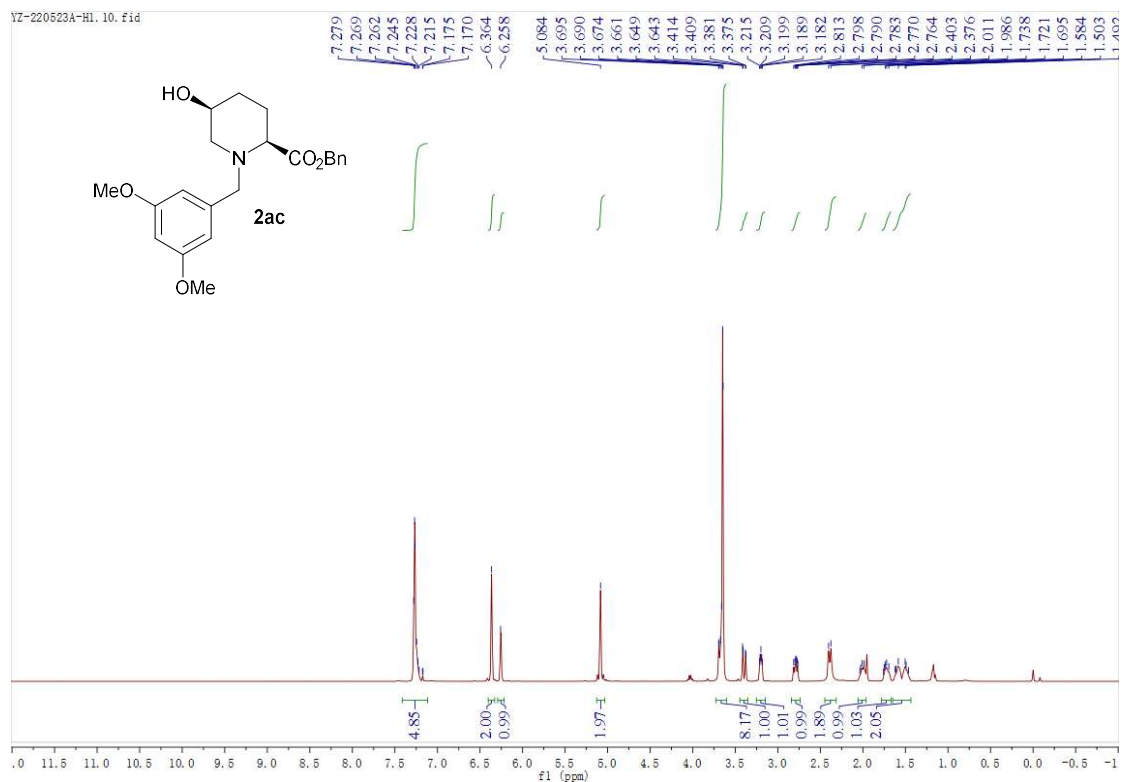

**<sup>1</sup>H-NMR Spectrum (400 MHz, Chloroform-*d*) of Compound 2ac**

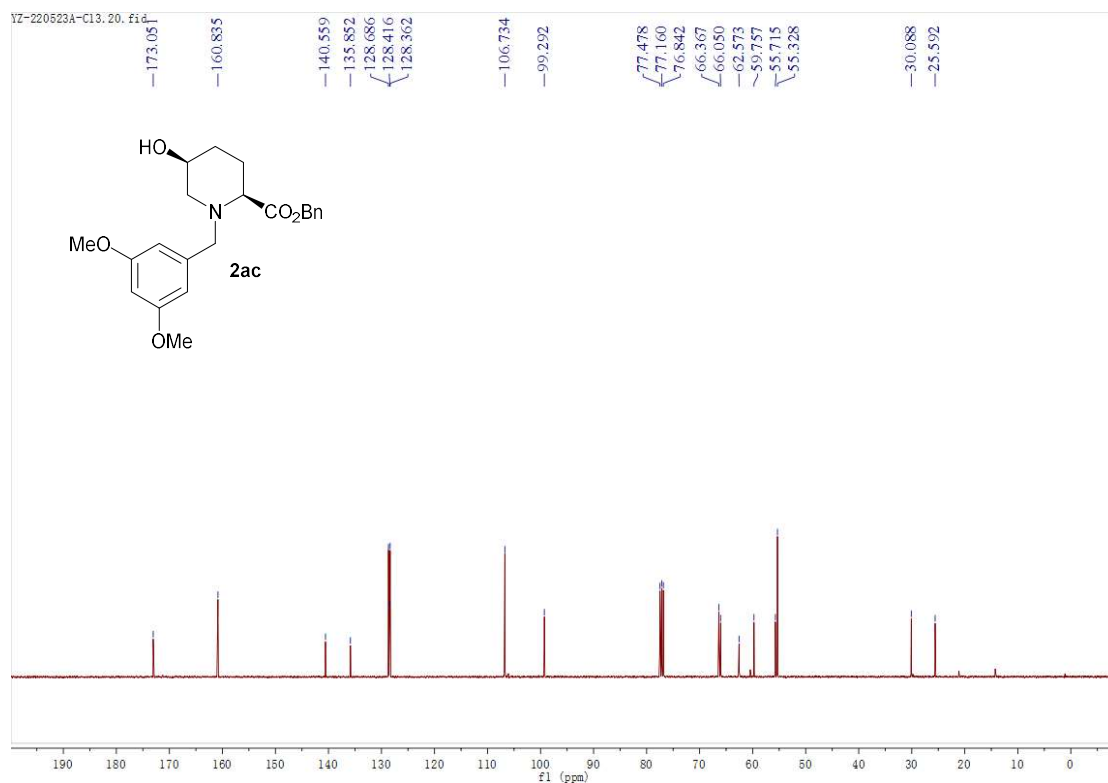

**<sup>13</sup>C-NMR Spectrum (100 MHz, Chloroform-*d*) of Compound 2ac**

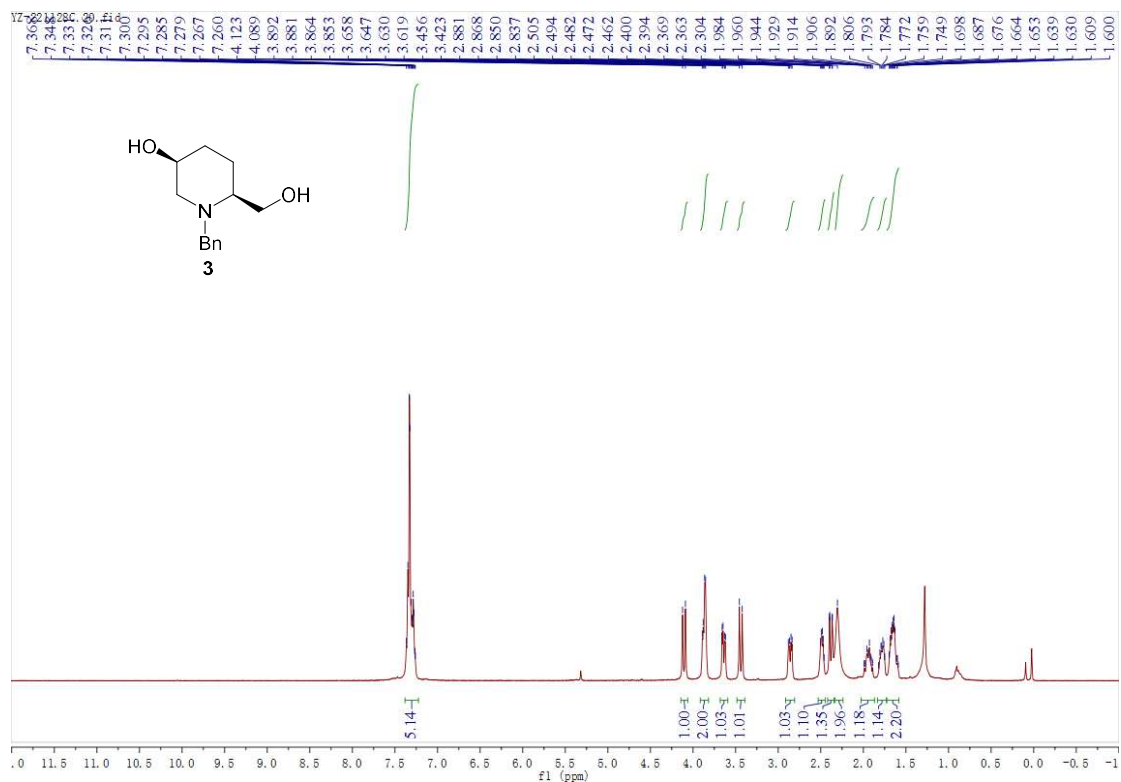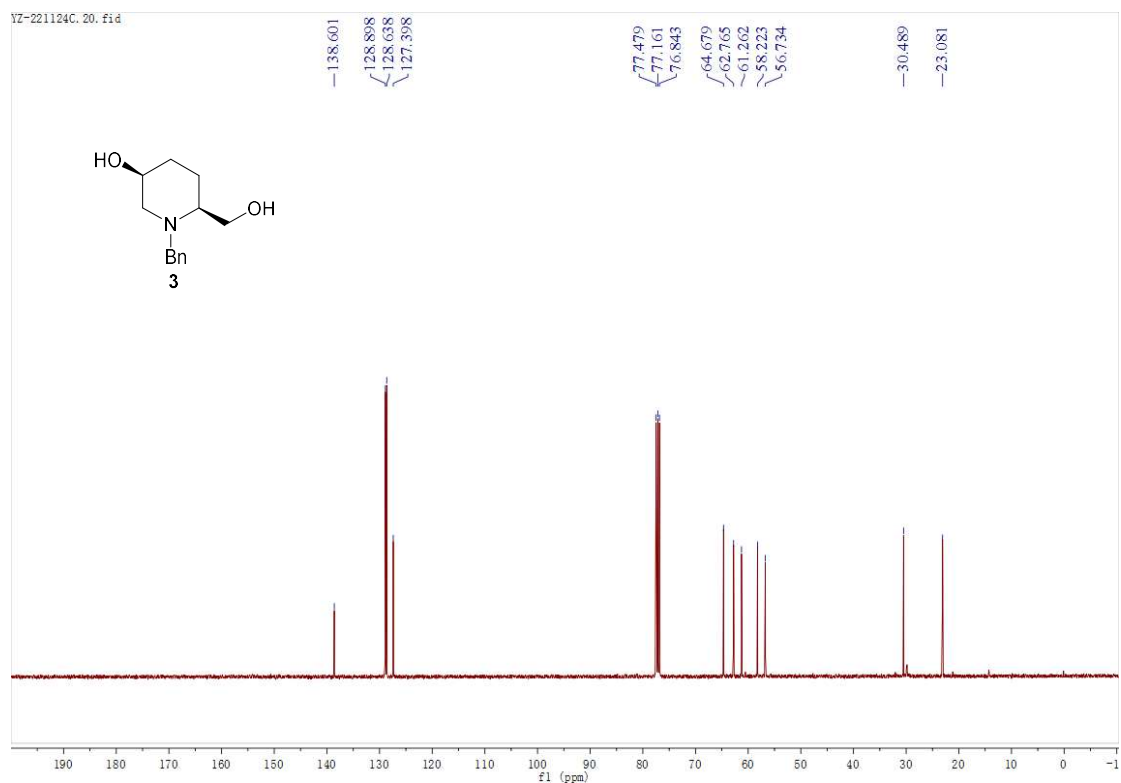

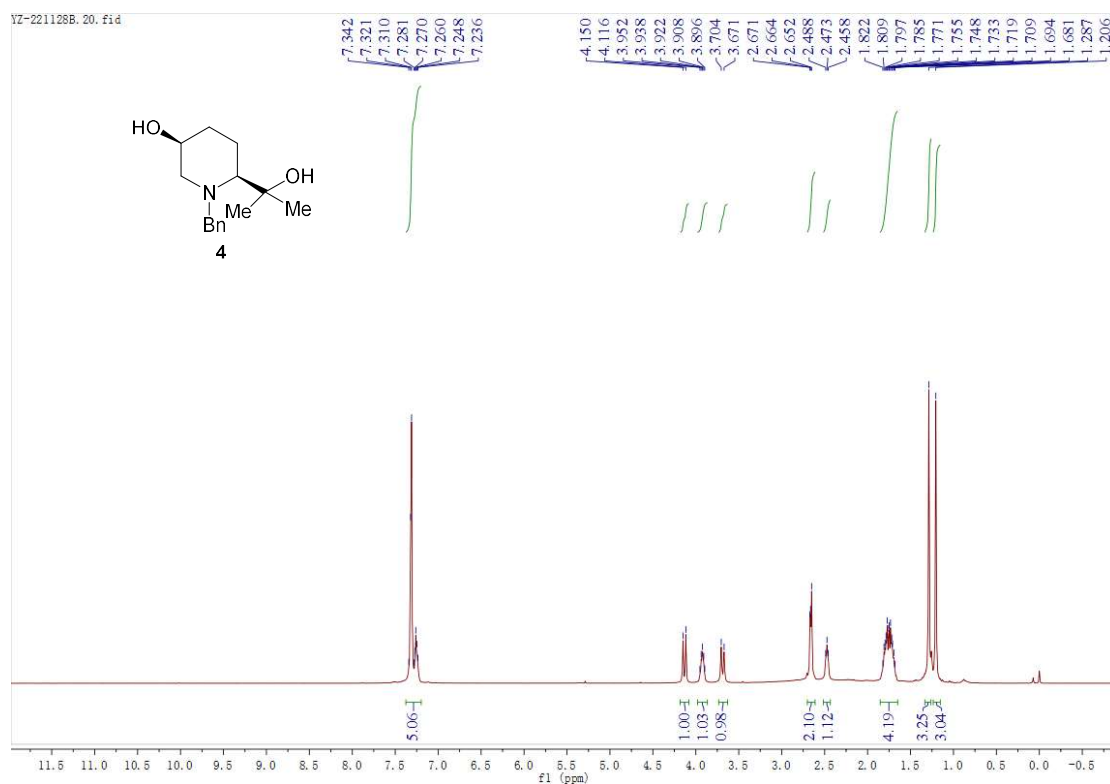

**<sup>1</sup>H-NMR Spectrum (400 MHz, Chloroform-*d*) of Compound 4**

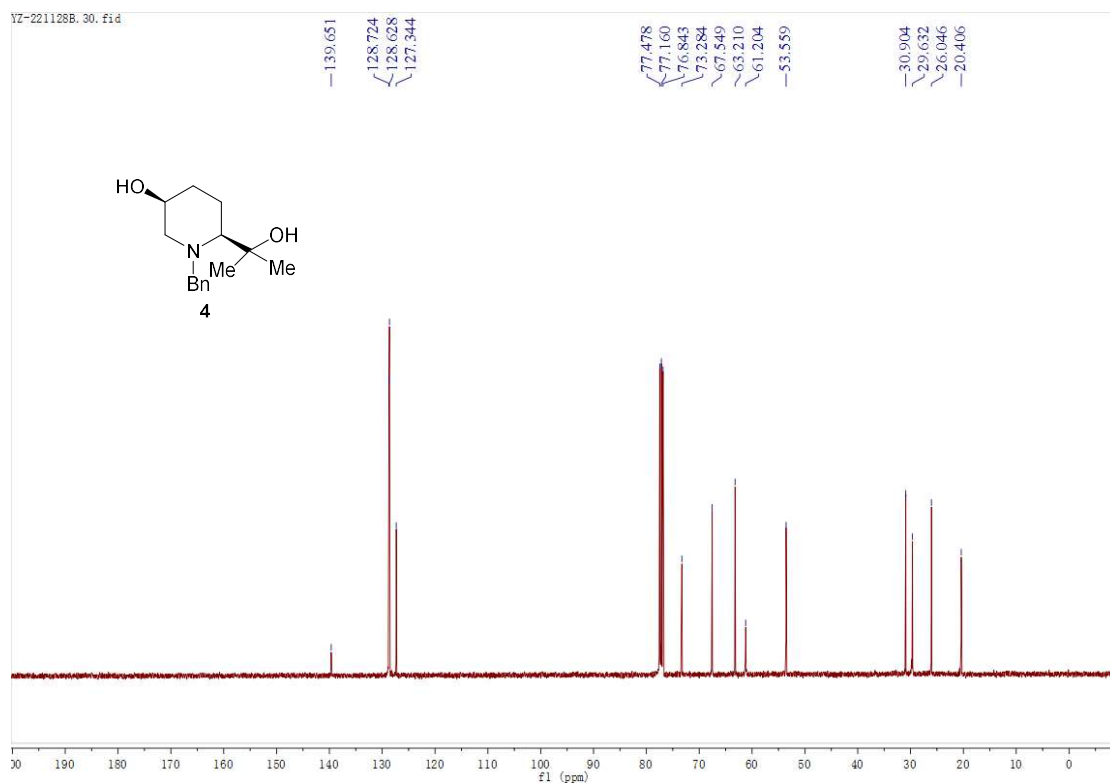

**<sup>13</sup>C-NMR Spectrum (100 MHz, Chloroform-*d*) of Compound 4**

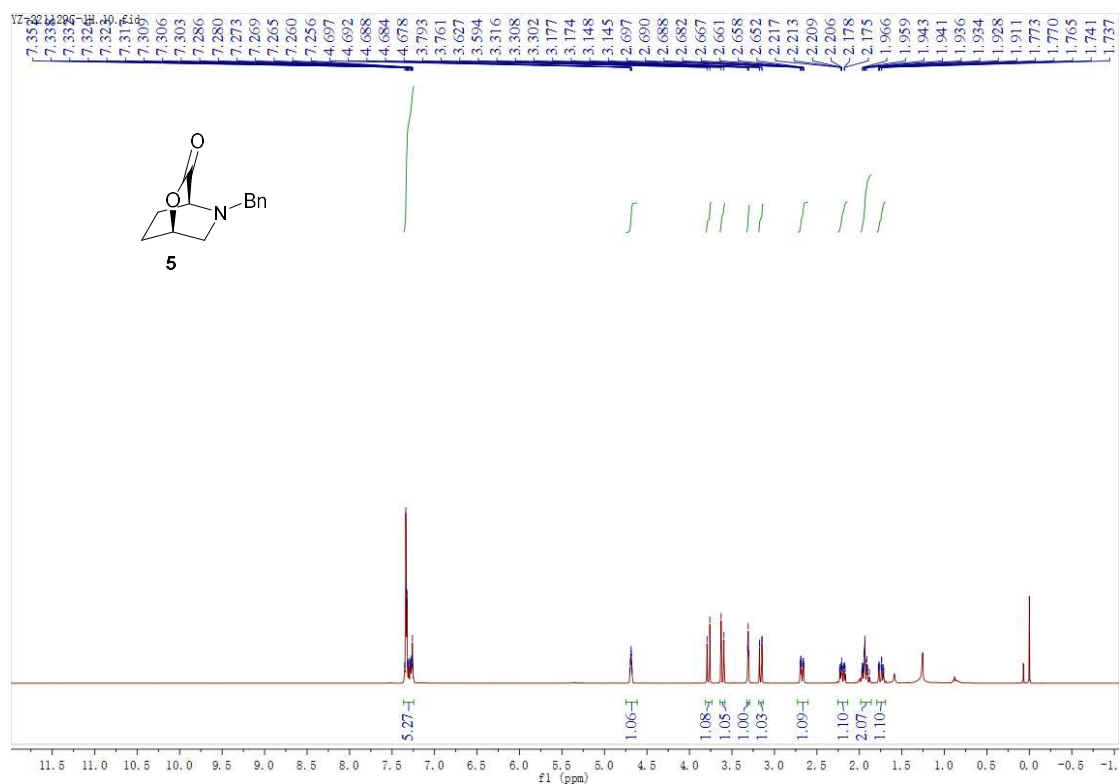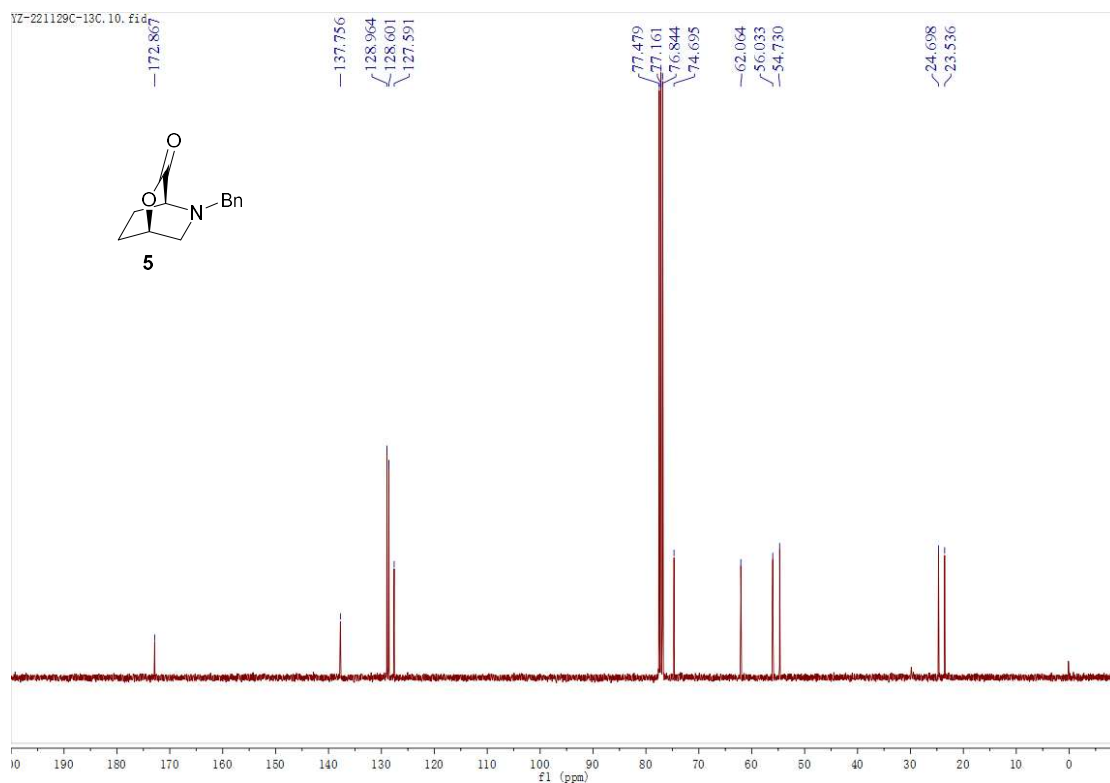

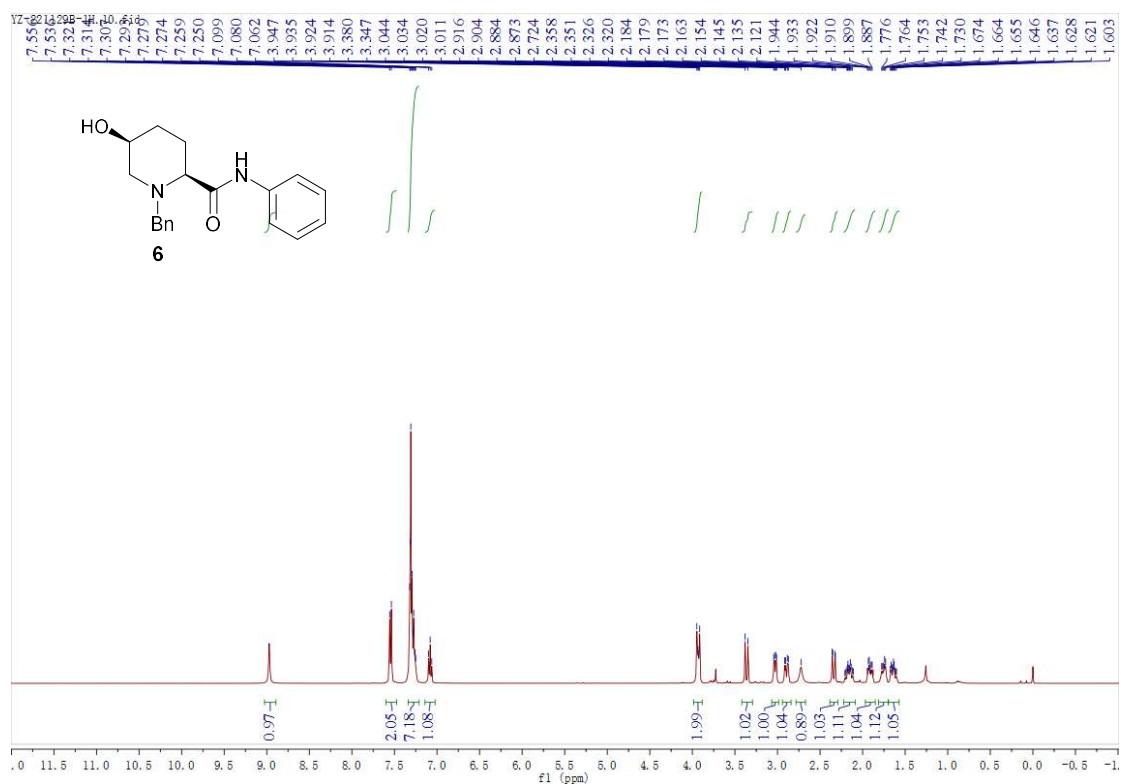

**<sup>1</sup>H-NMR Spectrum (400 MHz, Chloroform-*d*) of Compound 6**

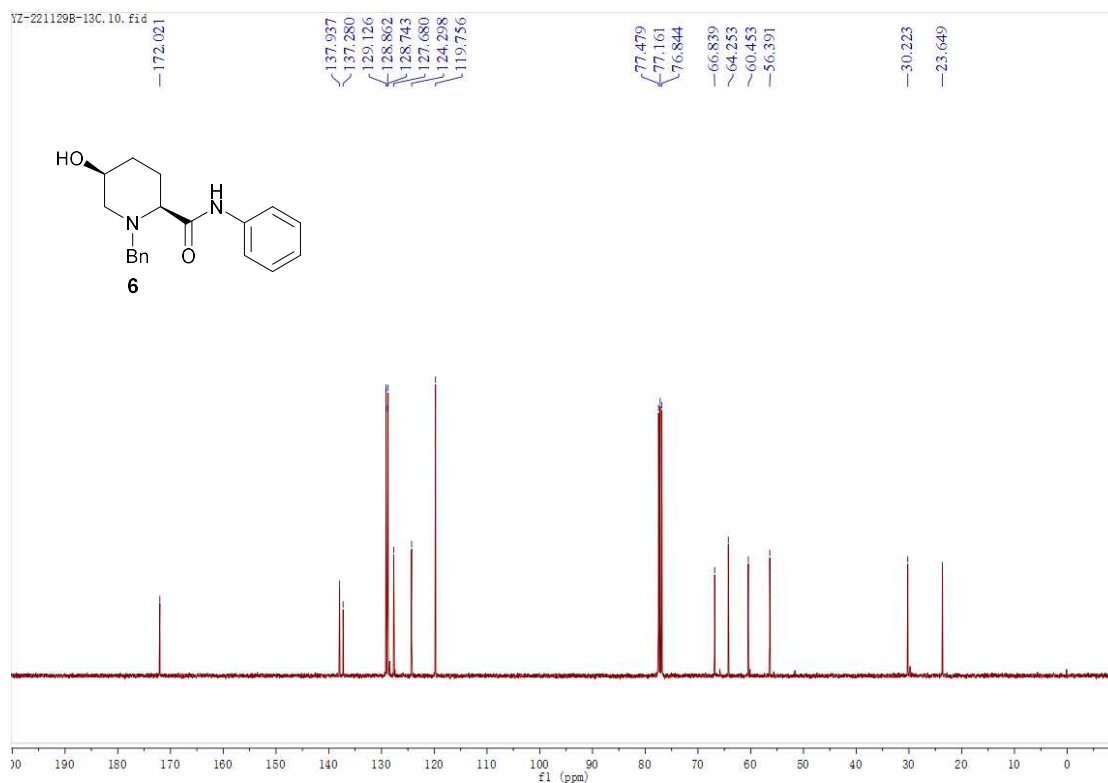

**<sup>13</sup>C-NMR Spectrum (100 MHz, Chloroform-*d*) of Compound 6**

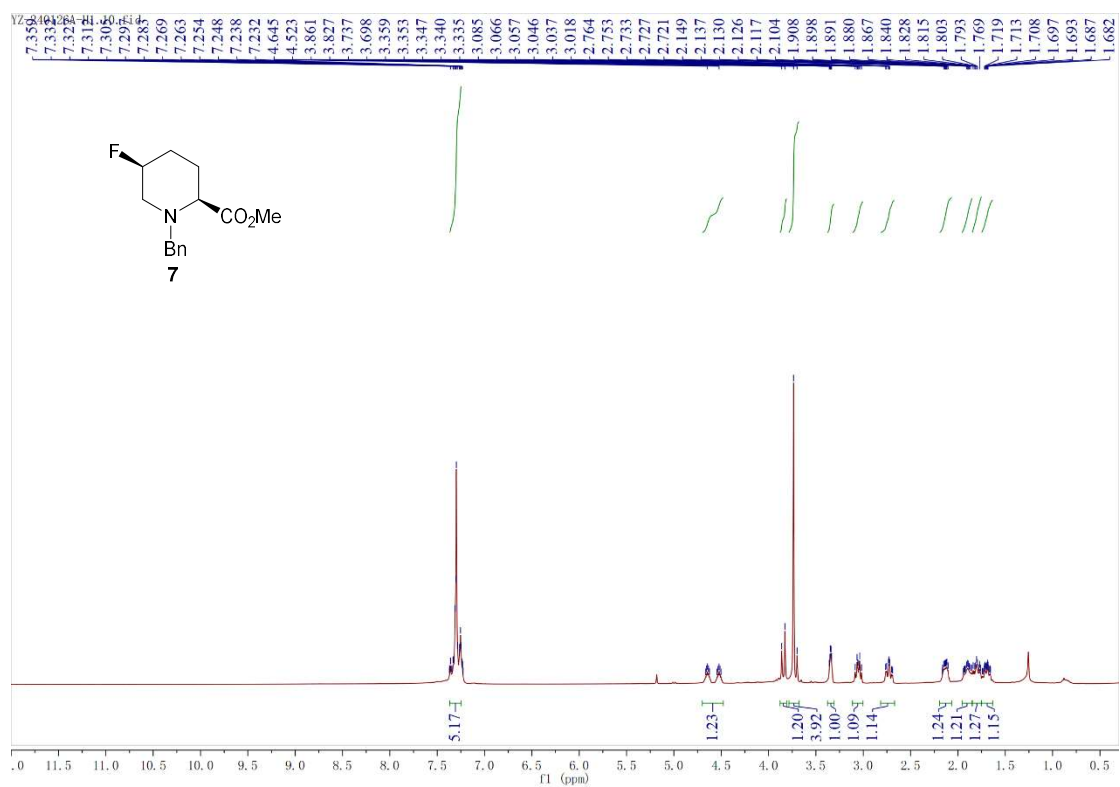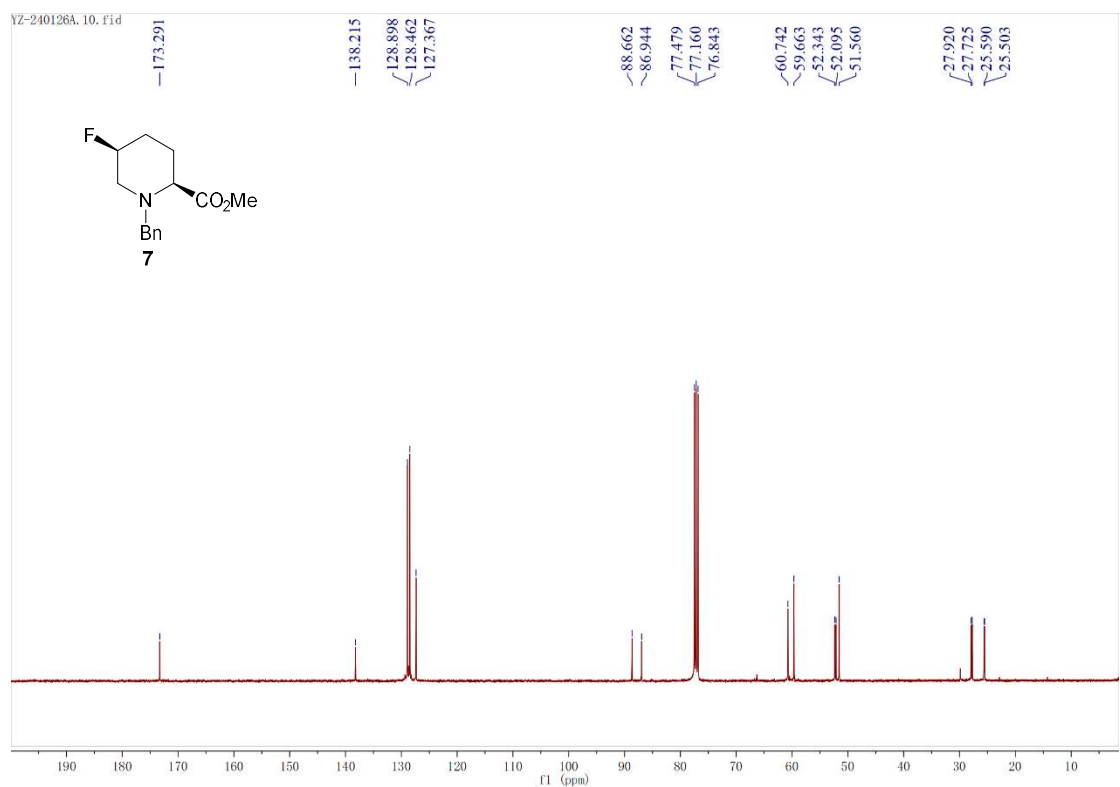

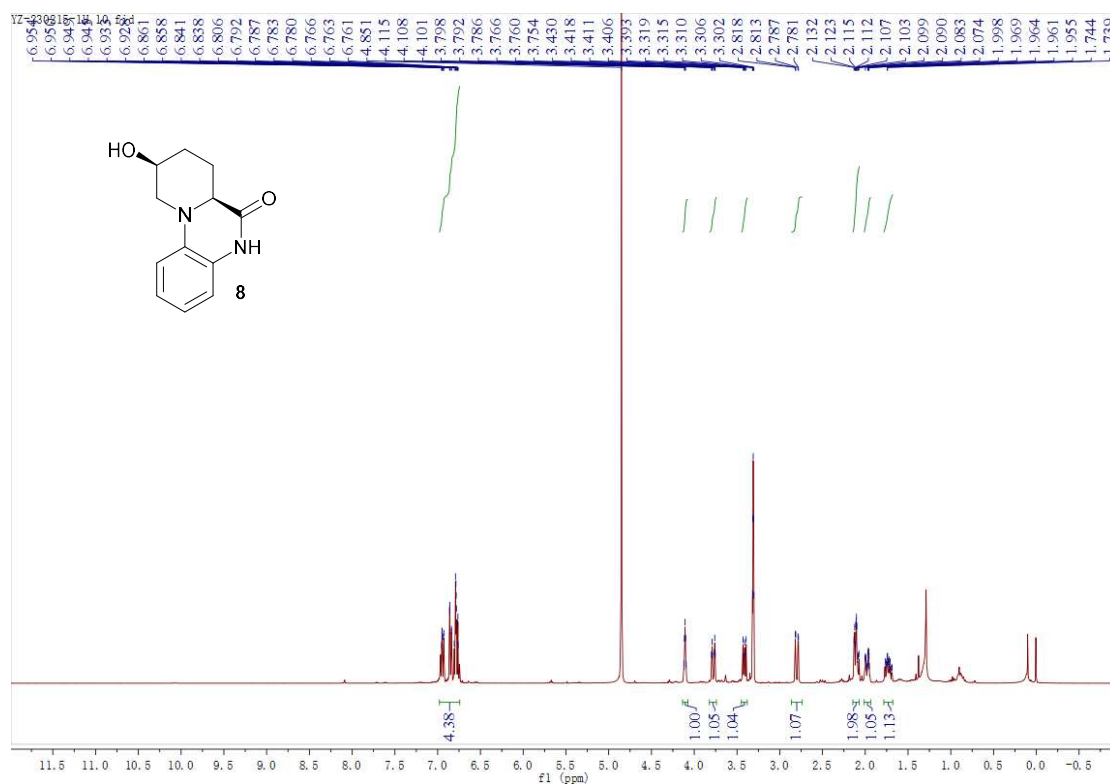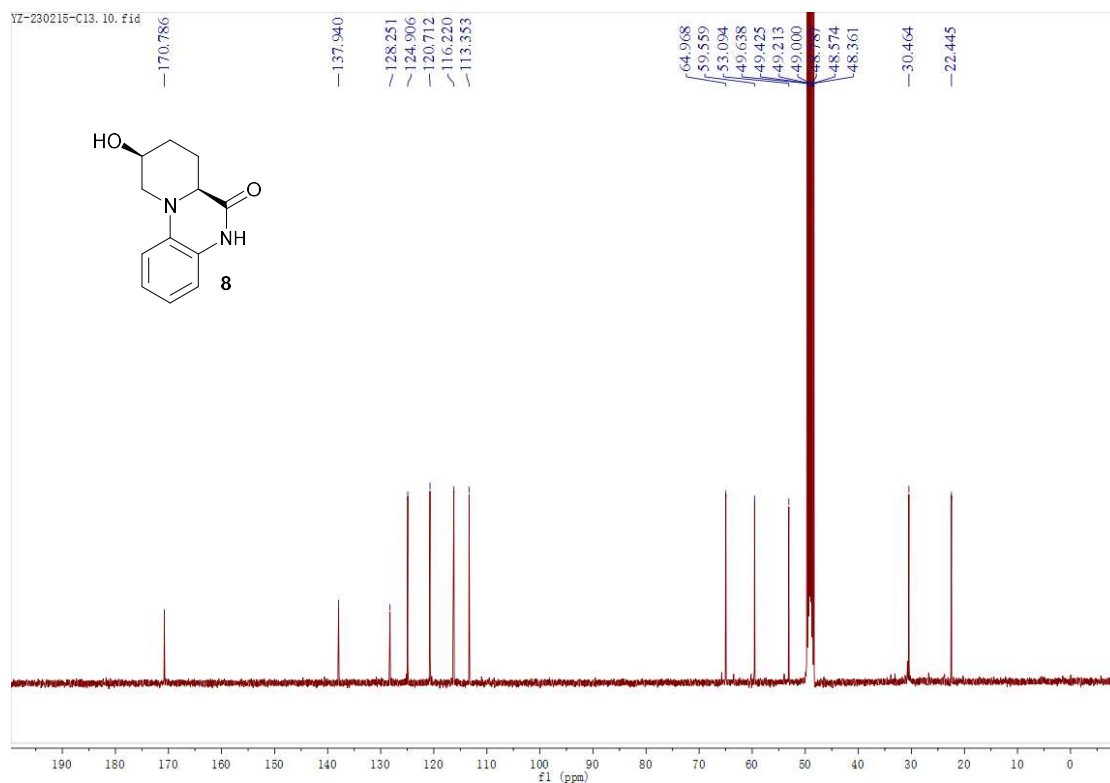



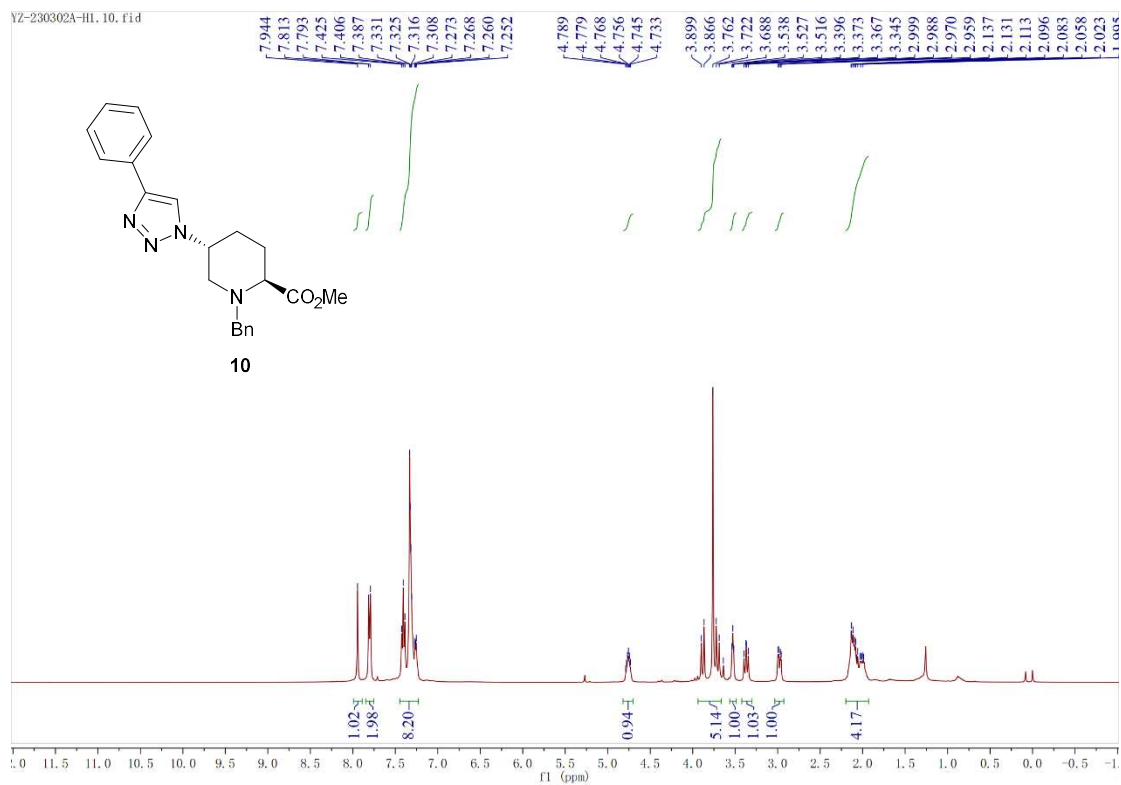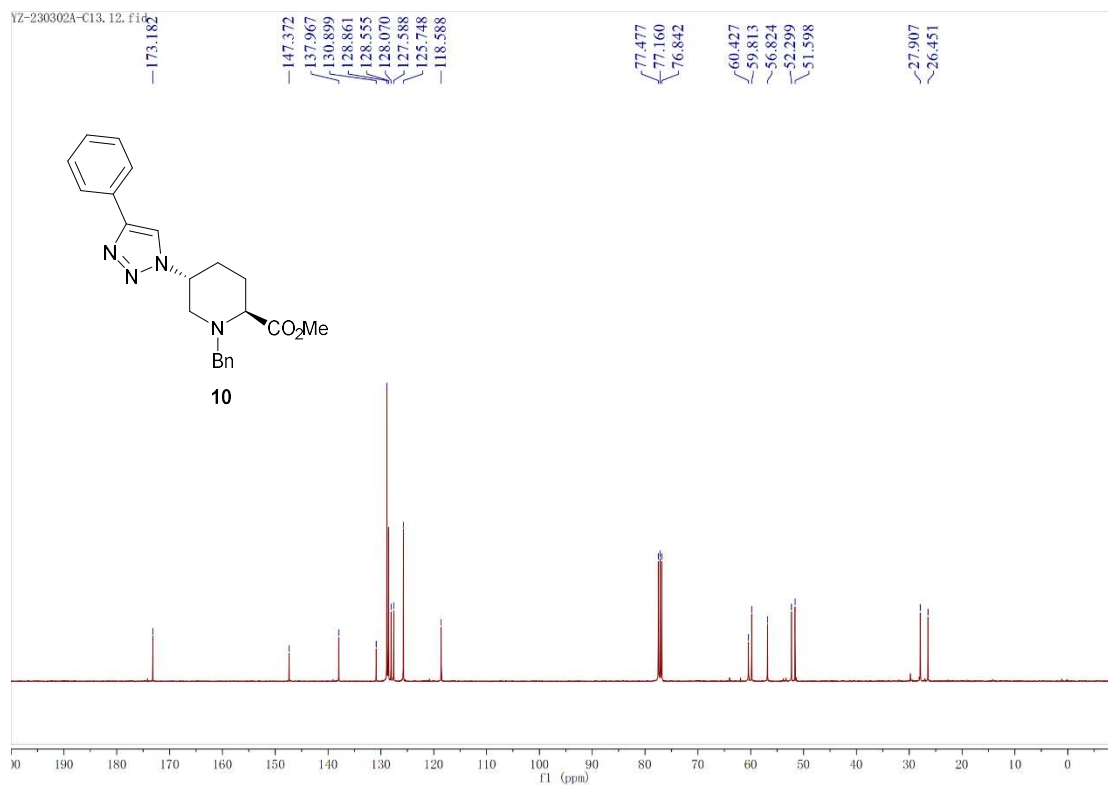

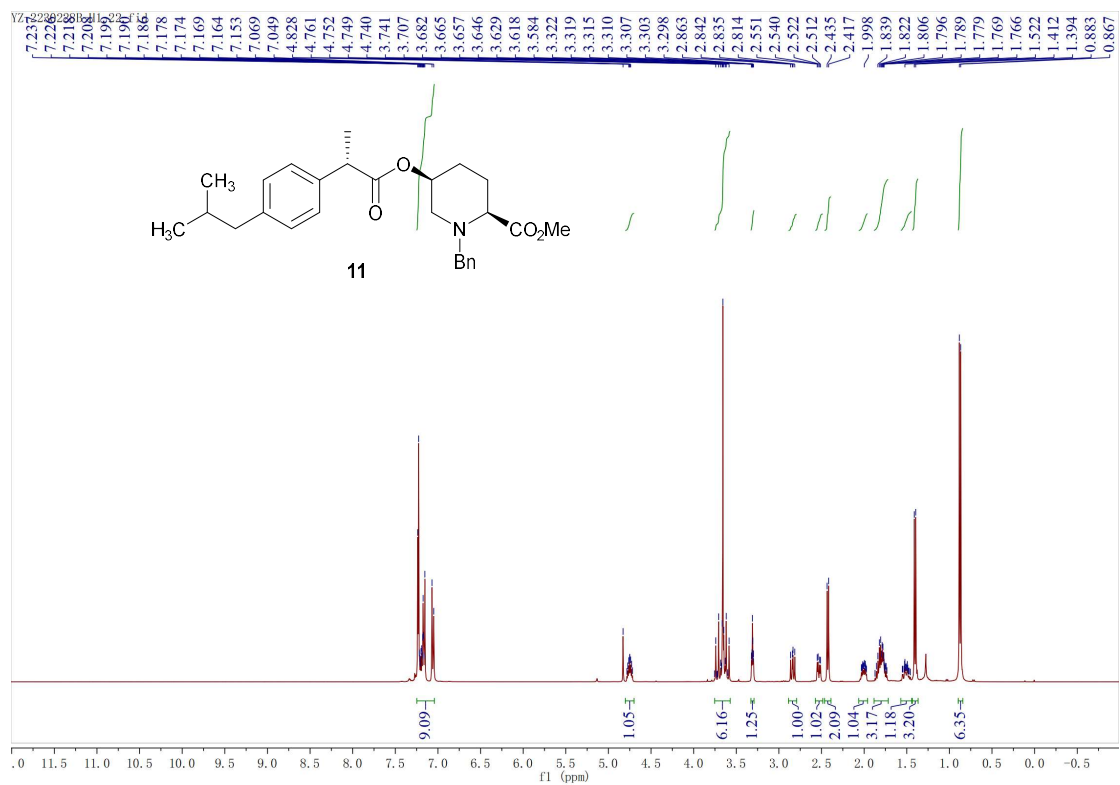

**<sup>1</sup>H-NMR Spectrum (400 MHz, Chloroform-*d*) of Compound 11**

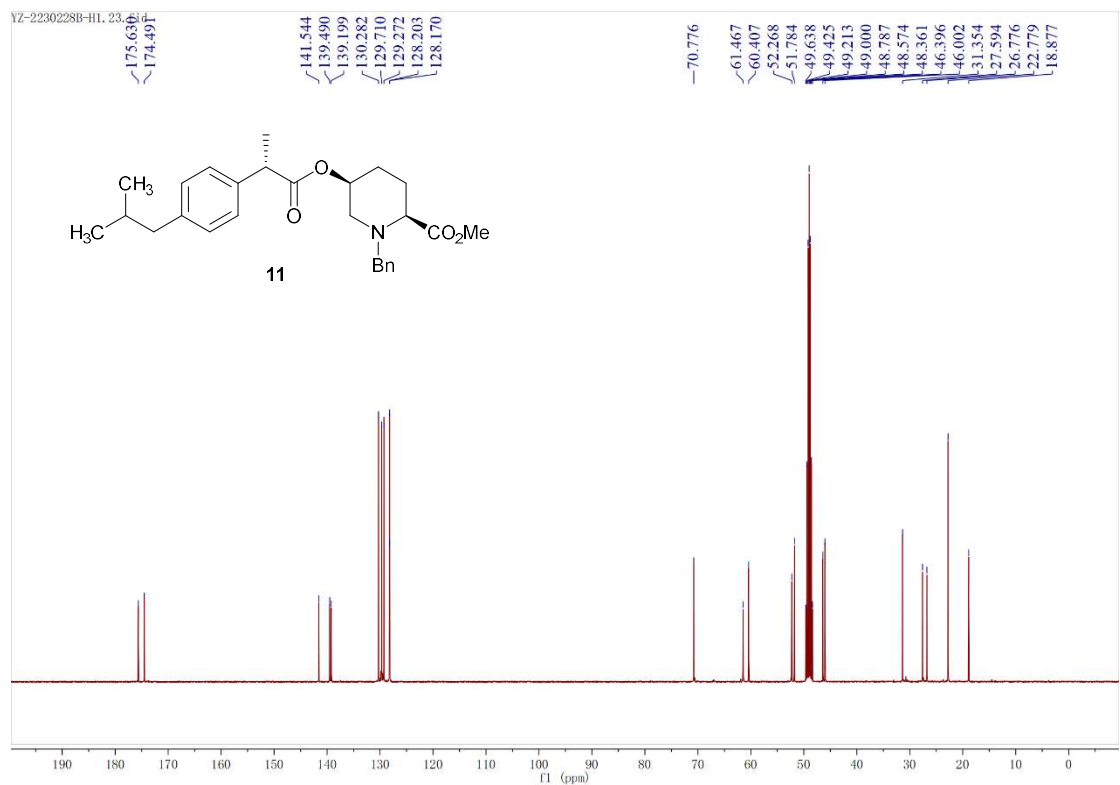

**<sup>13</sup>C-NMR Spectrum (100 MHz, Chloroform-*d*) of Compound 11**

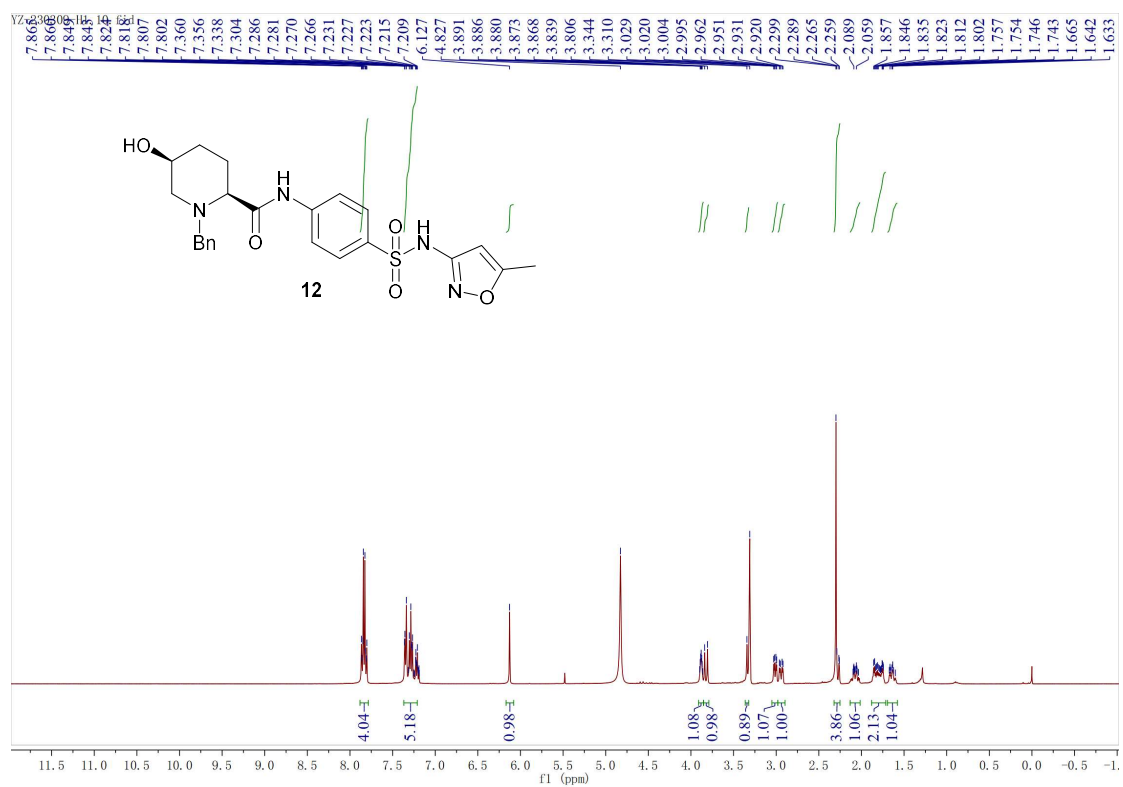

**<sup>1</sup>H-NMR Spectrum (400 MHz, Chloroform-*d*) of Compound 12**

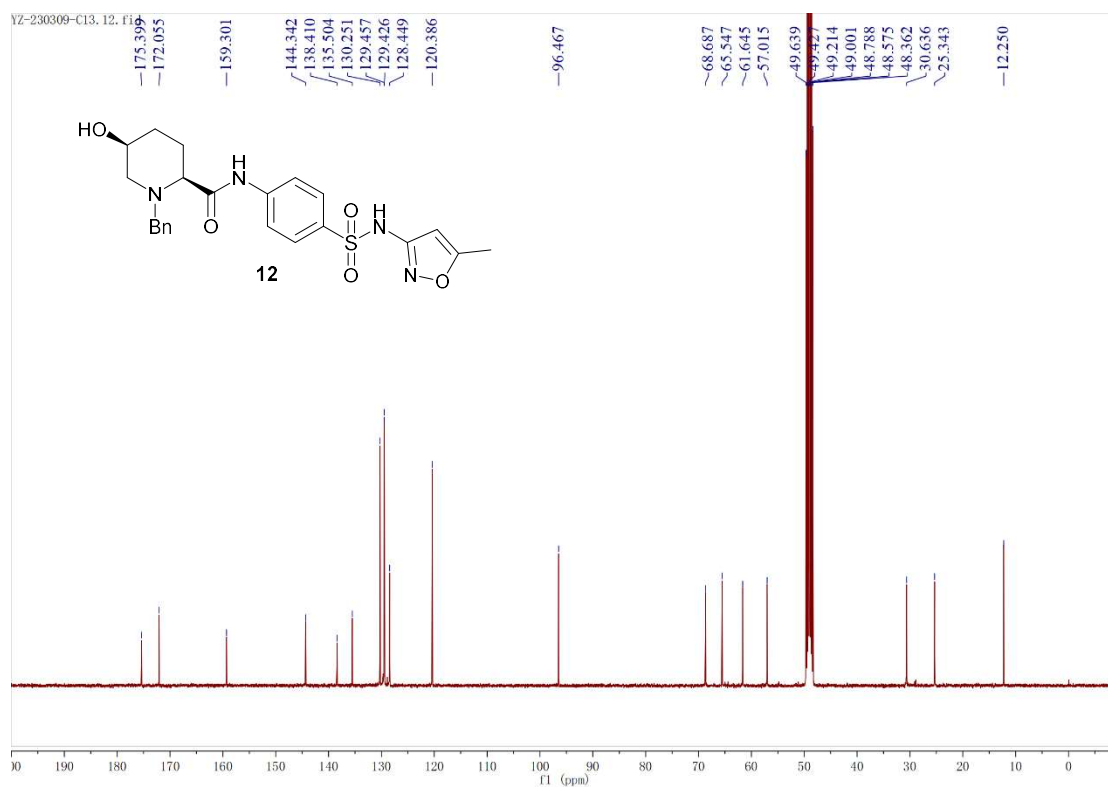

**<sup>13</sup>C-NMR Spectrum (100 MHz, Chloroform-*d*) of Compound 12**

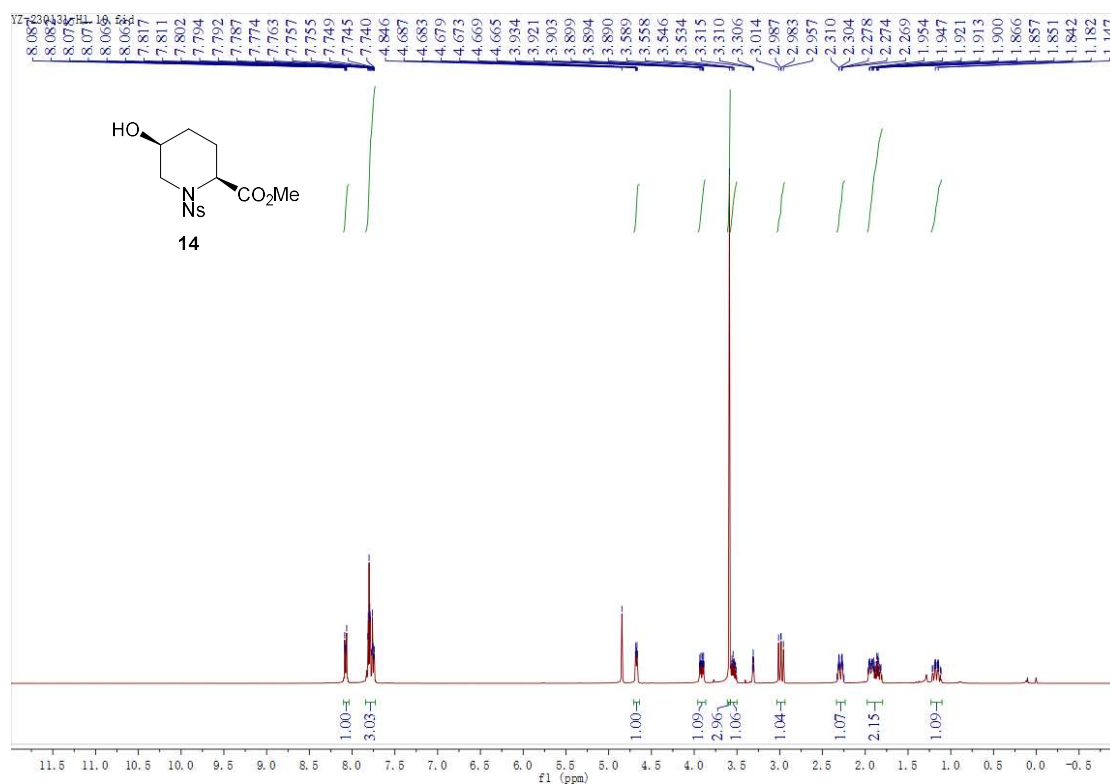

**<sup>1</sup>H-NMR Spectrum (400 MHz, Chloroform-*d*) of Compound 14**

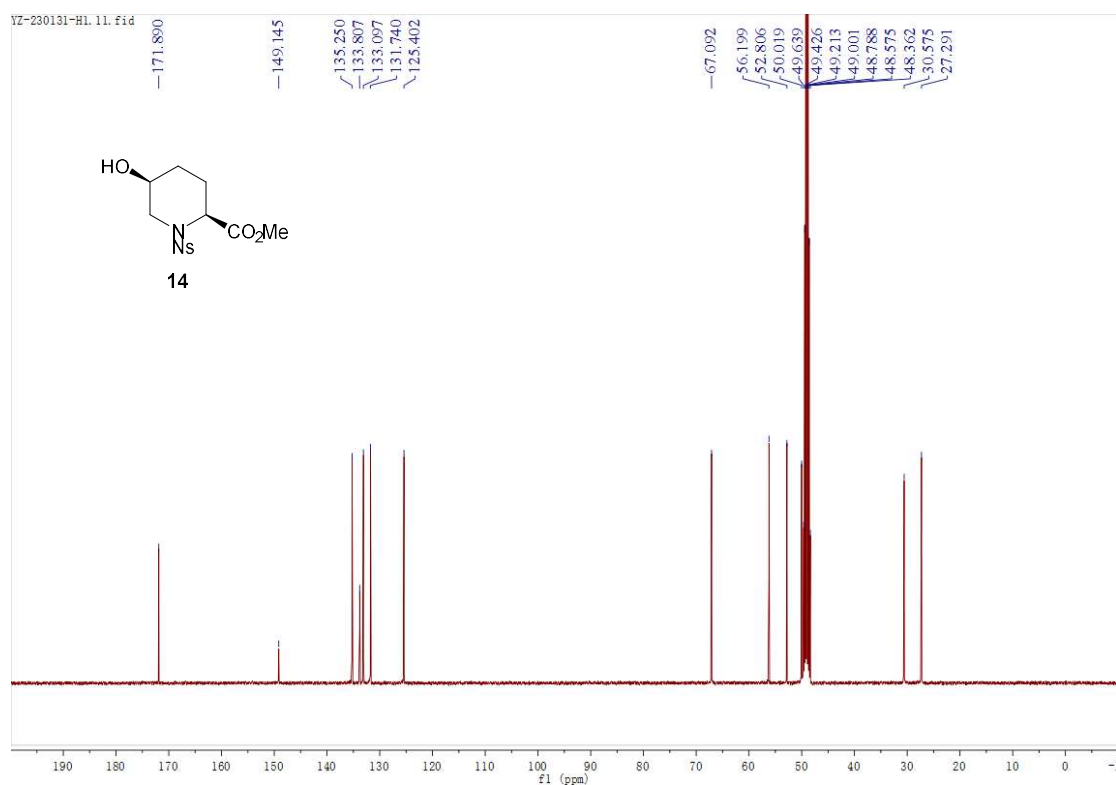

**<sup>13</sup>C-NMR Spectrum (100 MHz, Chloroform-*d*) of Compound 14**

## 5. HPLC Spectra

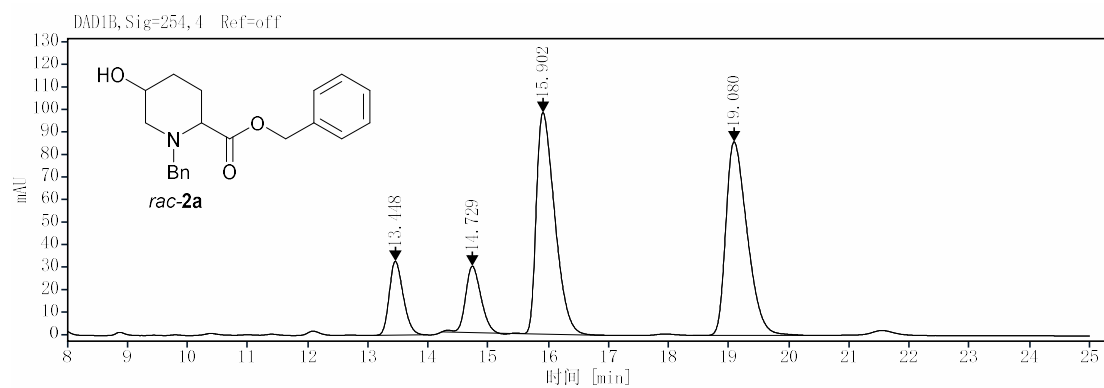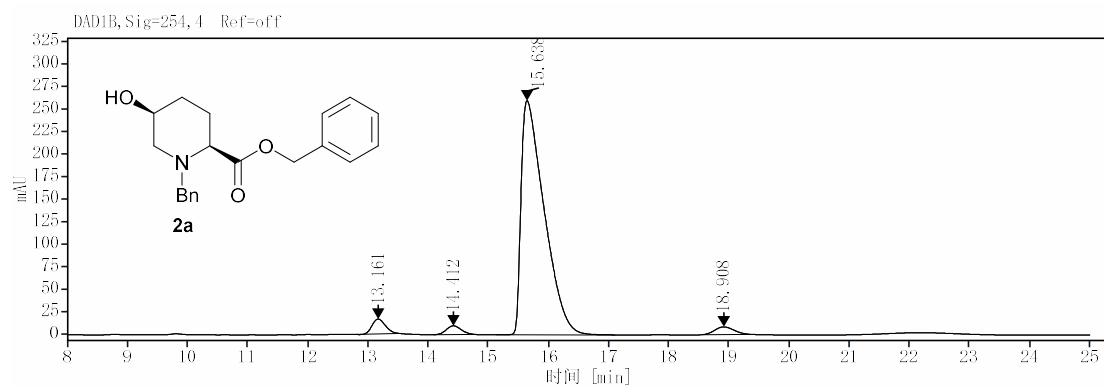

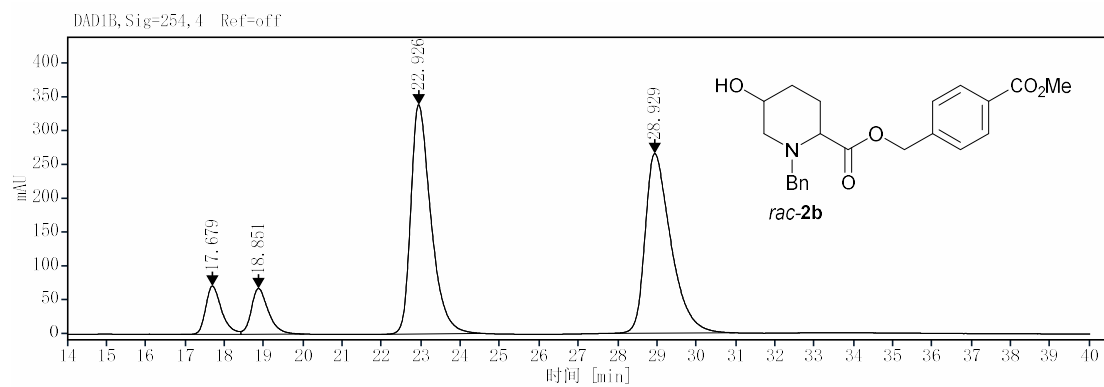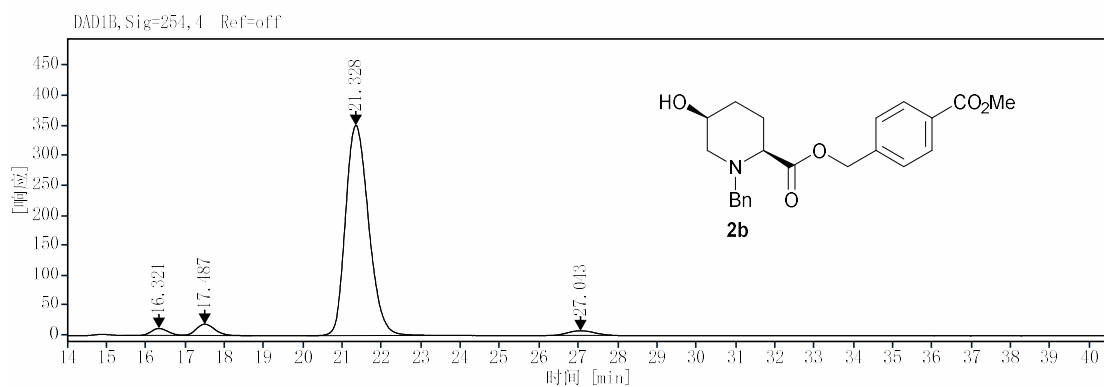

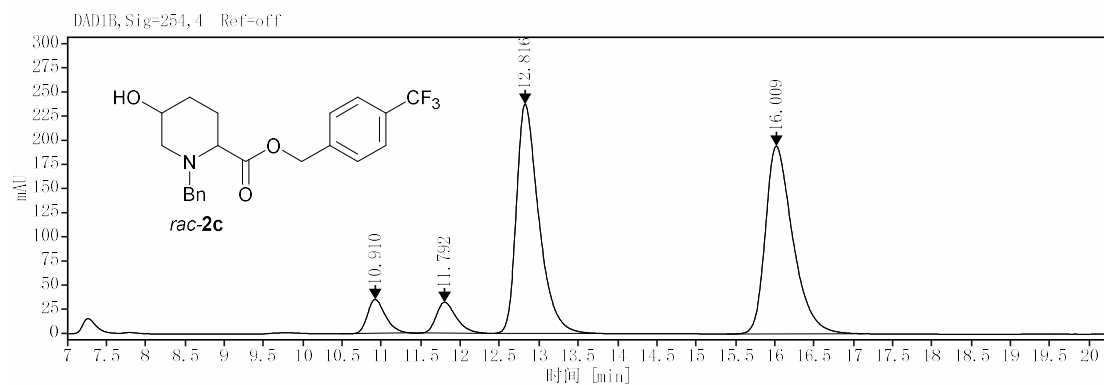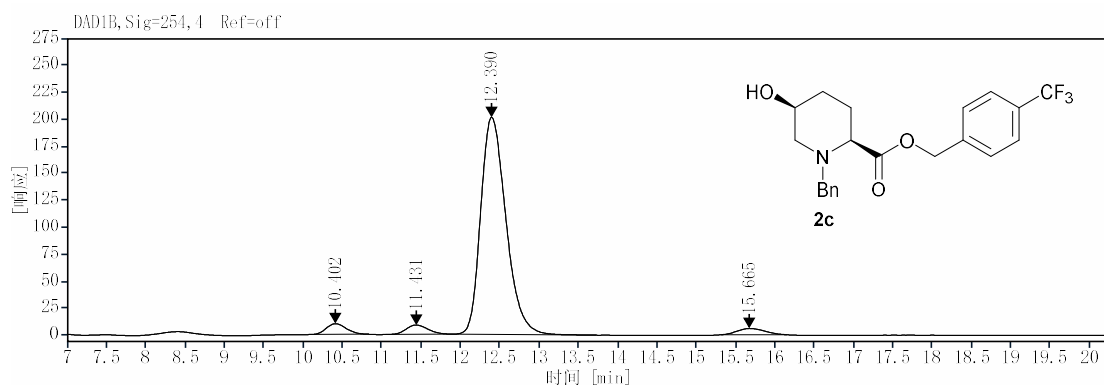

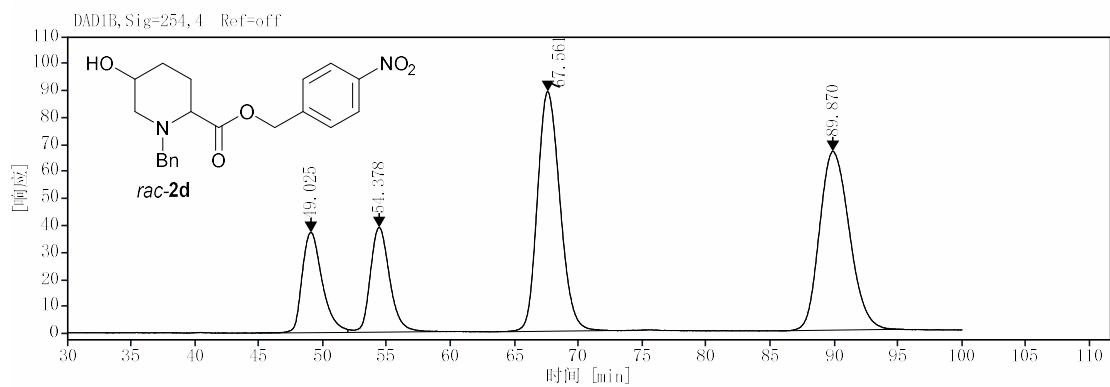

| Ret Time [min] | Type | Width [min] | Area [mAU * s] | Height [mAU] | Area% |
|----------------|------|-------------|----------------|--------------|-------|
| 49.025         | MM m | 1.31        | 4054.57        | 37.13        | 13.63 |
| 54.378         | MM m | 1.24        | 4097.81        | 38.78        | 13.78 |
| 67.561         | MM m | 1.44        | 10843.72       | 88.78        | 36.45 |
| 89.870         | MM m | 1.90        | 10749.52       | 66.24        | 36.14 |

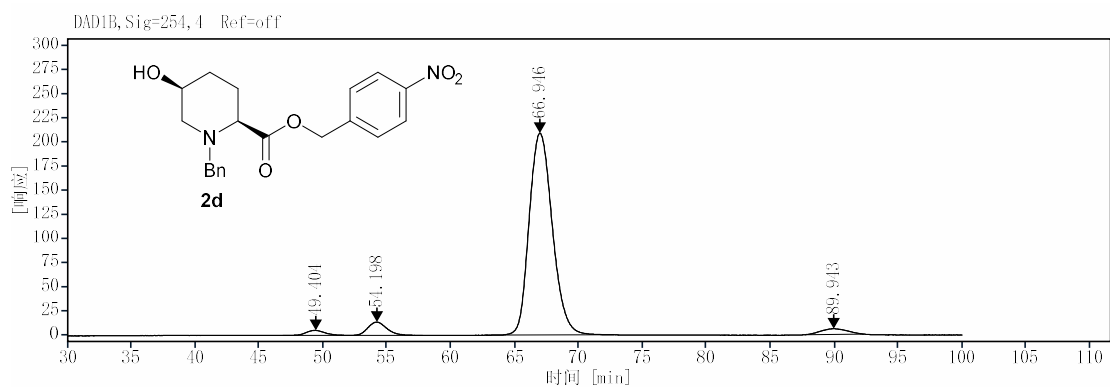

| Ret Time [min] | Type | Width [min] | Area [mAU * s] | Height [mAU] | Area% |
|----------------|------|-------------|----------------|--------------|-------|
| 49.404         | MM m | 1.17        | 514.95         | 5.16         | 1.76  |
| 54.198         | MM m | 1.21        | 1404.86        | 13.73        | 4.81  |
| 66.946         | MM m | 1.58        | 26416.70       | 209.37       | 90.49 |
| 89.943         | MM m | 1.68        | 857.70         | 5.96         | 2.94  |



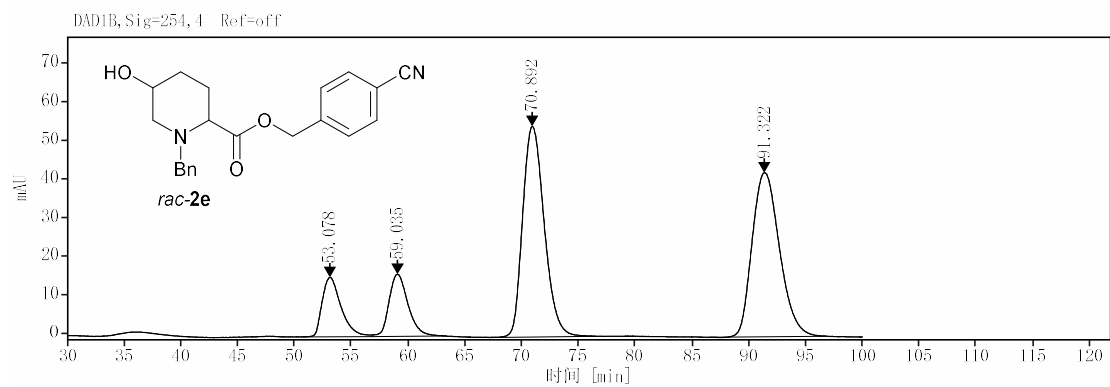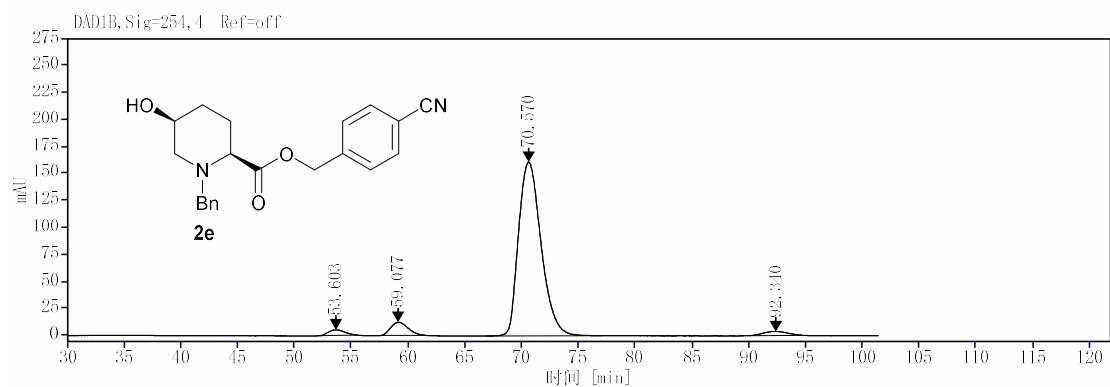

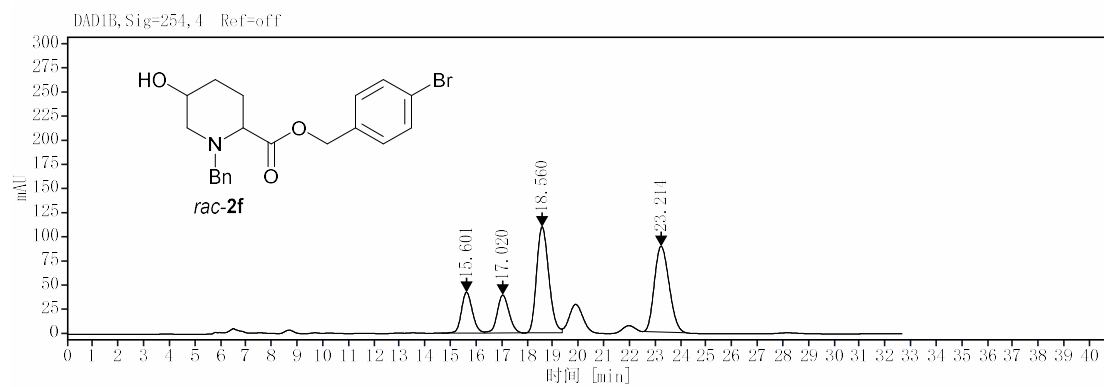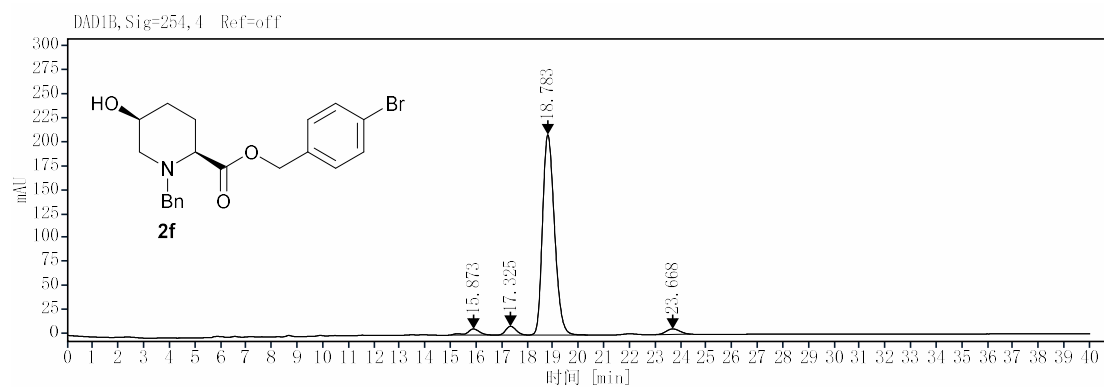

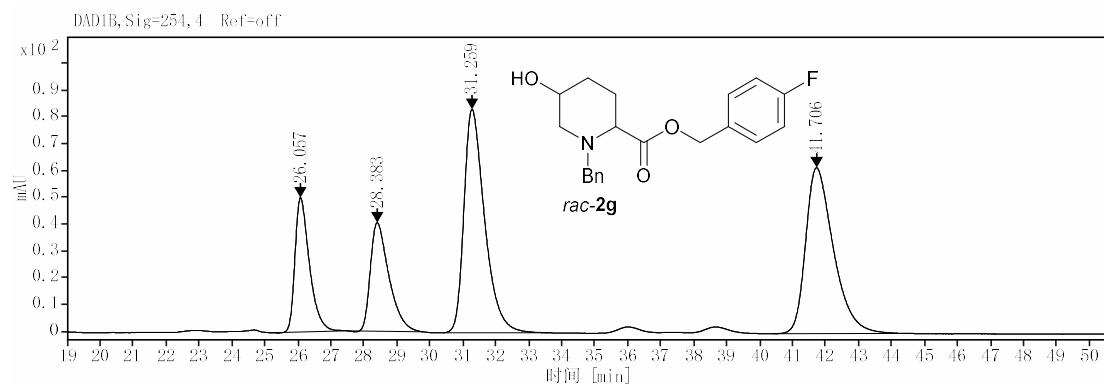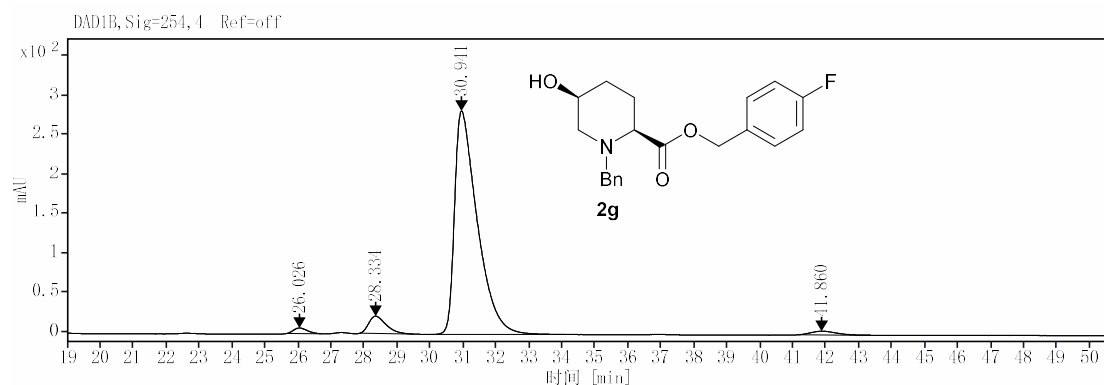

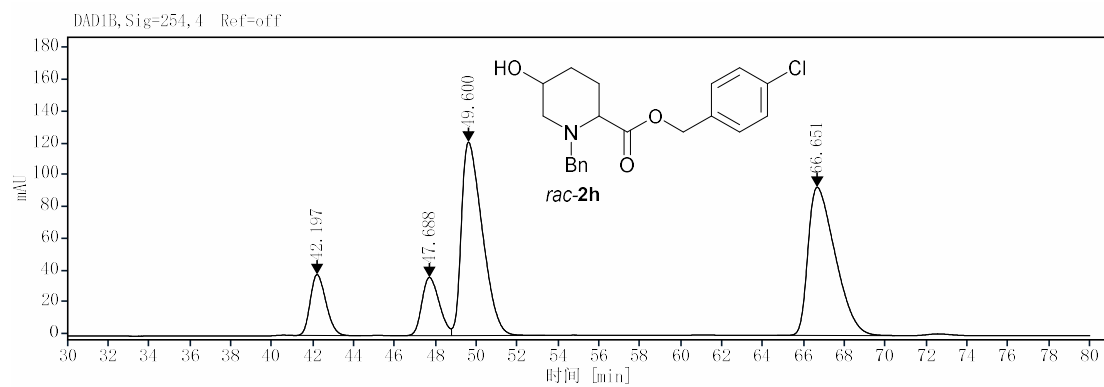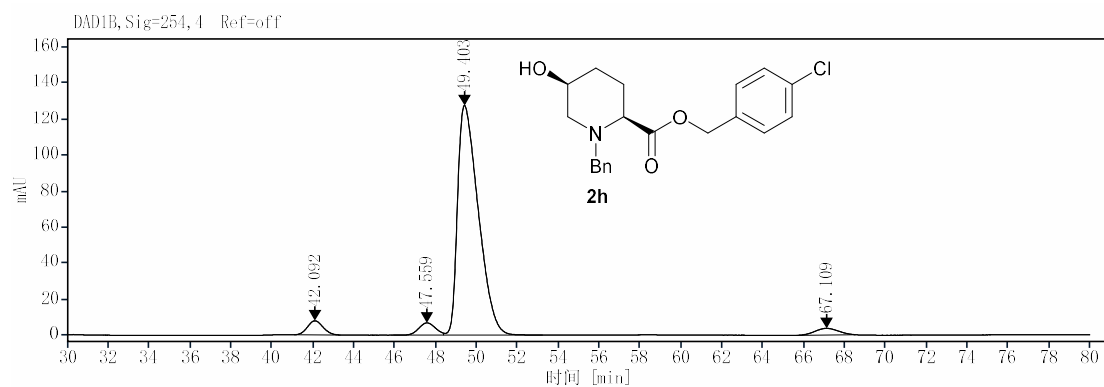

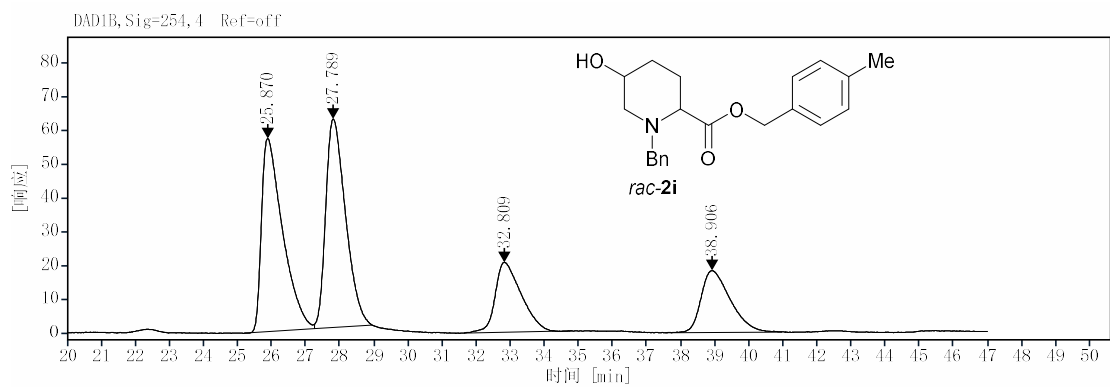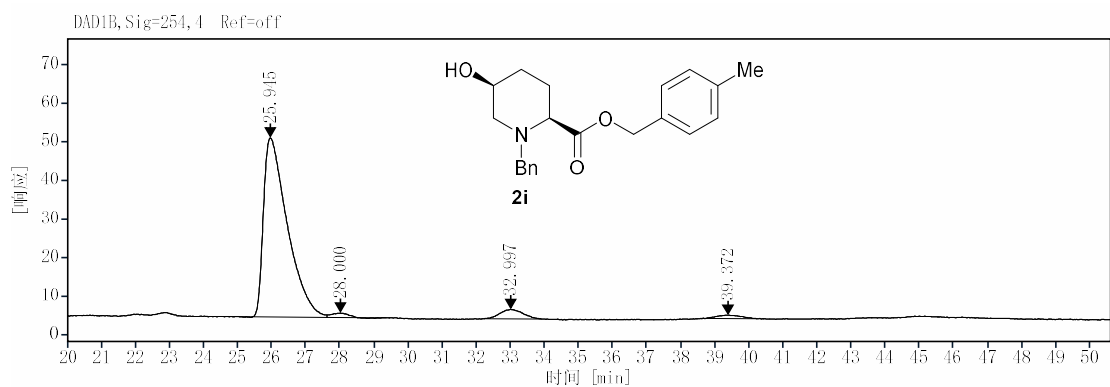

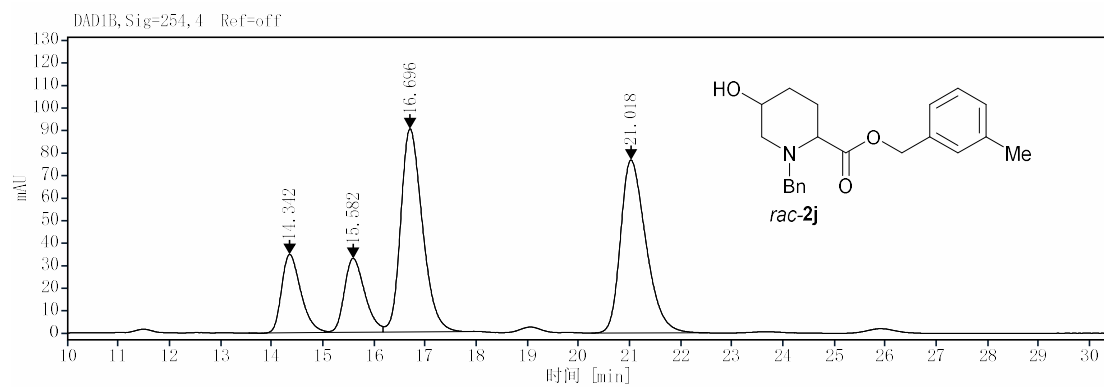

| Ret Time [min] | Type | Width [min] | Area [mAU * s] | Height [mAU] | Area% |
|----------------|------|-------------|----------------|--------------|-------|
| 14.342         | MM m | 0.40        | 906.09         | 34.79        | 12.67 |
| 15.582         | MM m | 0.42        | 914.03         | 32.88        | 12.78 |
| 16.696         | MM m | 0.46        | 2673.15        | 90.34        | 37.37 |
| 21.018         | MM m | 0.53        | 2659.89        | 76.86        | 37.18 |

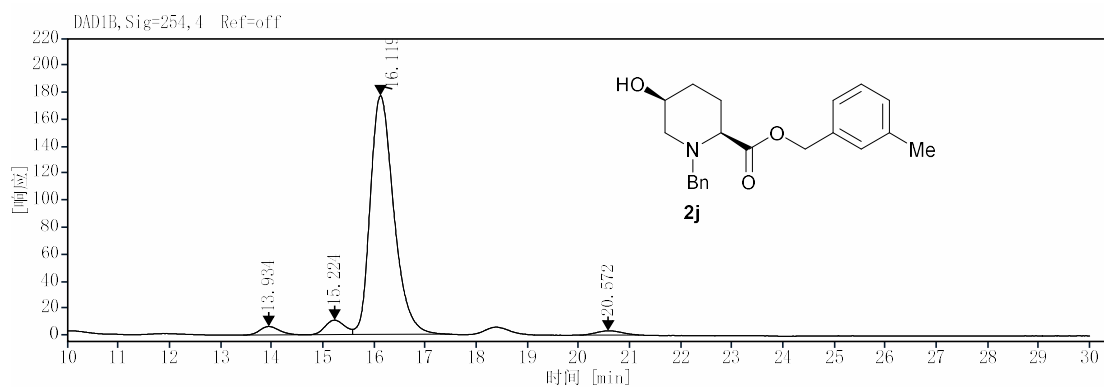

| Ret Time [min] | Type | Width [min] | Area [mAU * s] | Height [mAU] | Area% |
|----------------|------|-------------|----------------|--------------|-------|
| 13.934         | MM m | 0.32        | 163.00         | 6.21         | 2.62  |
| 15.224         | MM m | 0.33        | 286.50         | 10.72        | 4.61  |
| 16.119         | MM m | 0.50        | 5660.57        | 176.83       | 91.07 |
| 20.572         | MM m | 0.42        | 105.41         | 3.02         | 1.70  |

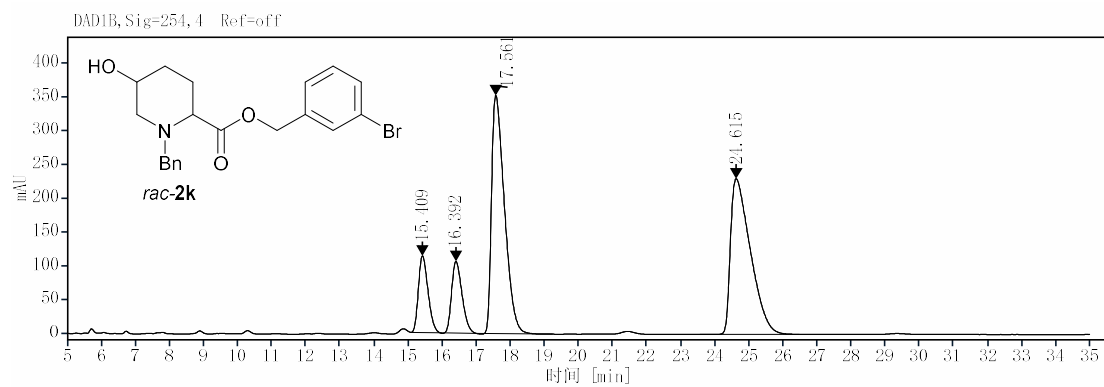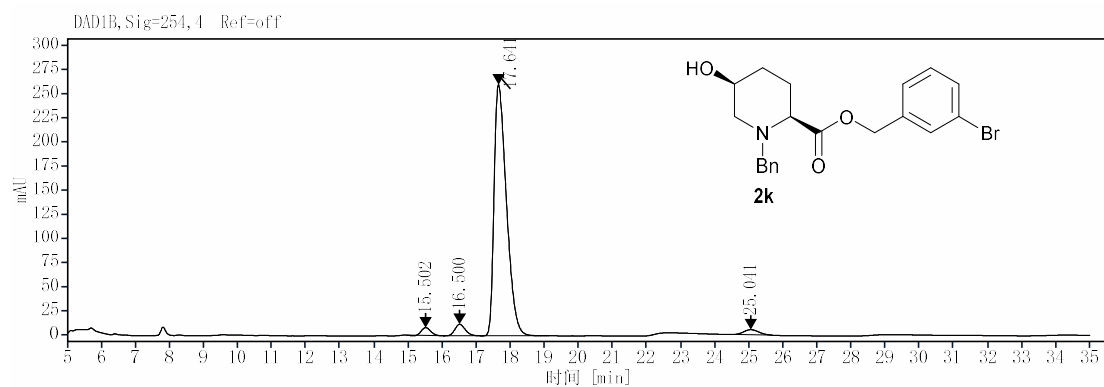

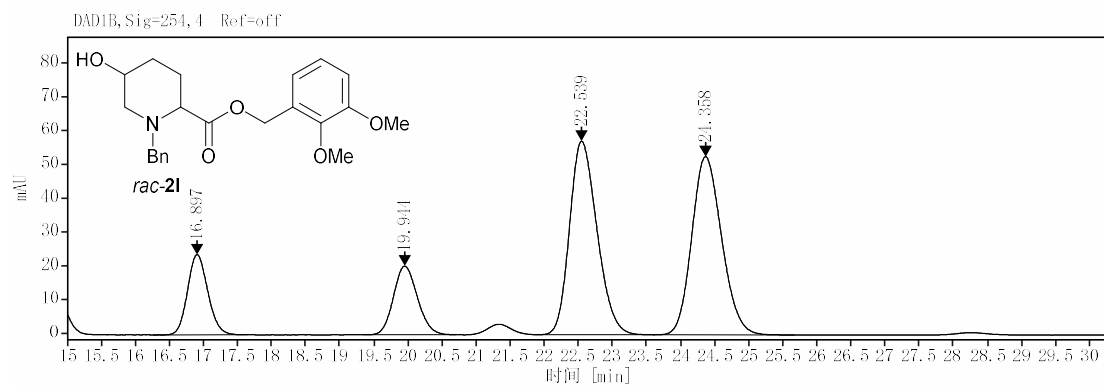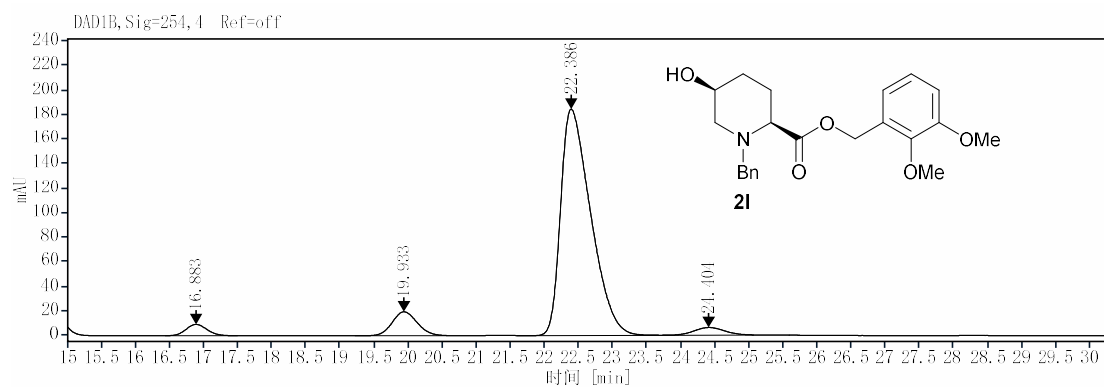



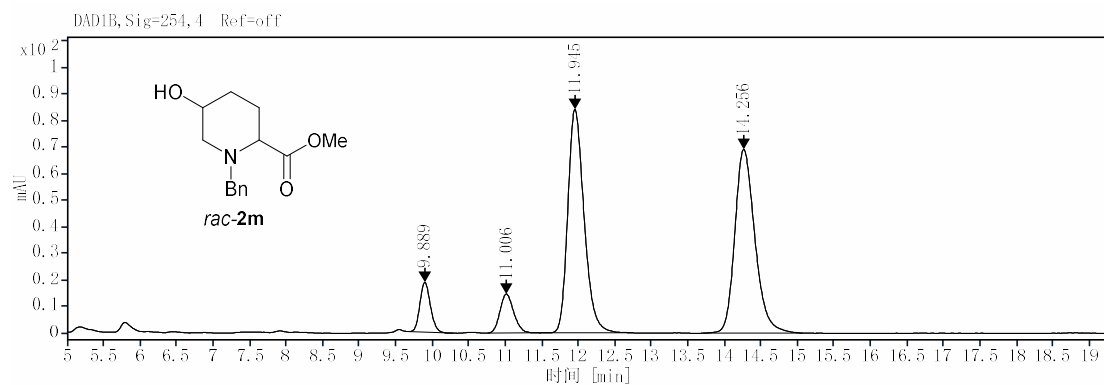

| Ret Time [min] | Type | Width [min] | Area [mAU * s] | Height [mAU] | Area% |
|----------------|------|-------------|----------------|--------------|-------|
| 9.889          | MM m | 0.15        | 187.35         | 18.72        | 6.23  |
| 11.006         | MM m | 0.20        | 191.46         | 14.61        | 6.37  |
| 11.945         | MM m | 0.24        | 1304.70        | 84.03        | 43.40 |
| 14.256         | MM m | 0.29        | 1322.61        | 69.06        | 44.00 |

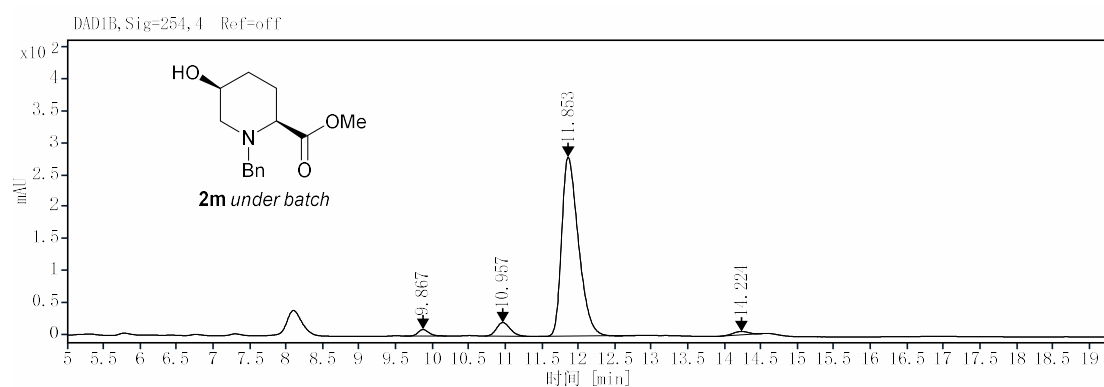

| Ret Time [min] | Type | Width [min] | Area [mAU * s] | Height [mAU] | Area% |
|----------------|------|-------------|----------------|--------------|-------|
| 9.867          | MM m | 0.16        | 104.58         | 10.23        | 2.13  |
| 10.957         | MM m | 0.20        | 278.87         | 21.27        | 5.67  |
| 11.853         | MM m | 0.24        | 4459.27        | 279.88       | 90.67 |
| 14.224         | MM m | 0.23        | 75.44          | 5.29         | 1.53  |

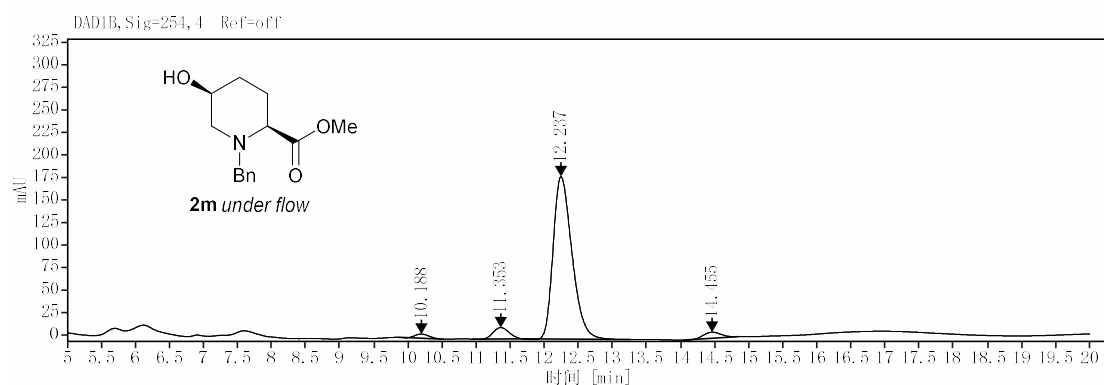

| Ret Time [min] | Type | Width [min] | Area [mAU * s] | Height [mAU] | Area% |
|----------------|------|-------------|----------------|--------------|-------|
| 10.188         | MM m | 0.23        | 68.42          | 4.81         | 1.78  |
| 11.353         | MM m | 0.26        | 204.21         | 12.67        | 5.31  |
| 12.237         | MM m | 0.30        | 3458.96        | 180.46       | 89.90 |
| 14.455         | MM m | 0.27        | 116.06         | 6.68         | 3.02  |

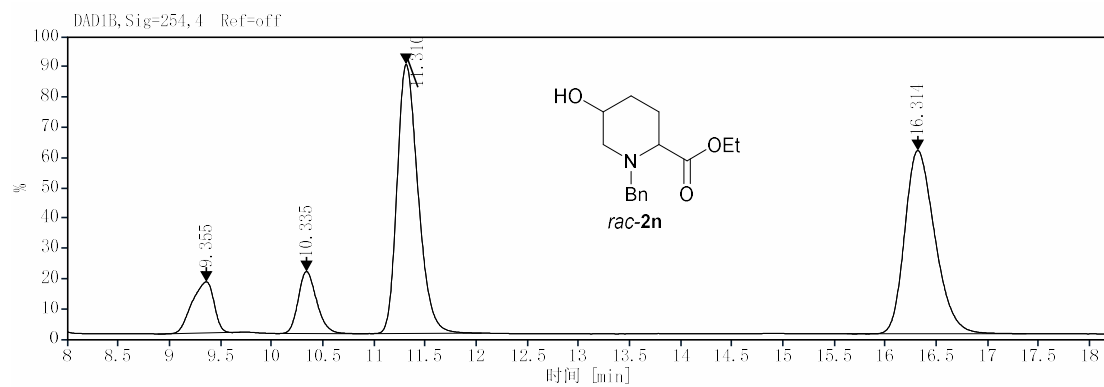

| Ret Time [min] | Type | Width [min] | Area [mAU * s] | Height [mAU] | Area% |
|----------------|------|-------------|----------------|--------------|-------|
| 9.355          | MM m | 0.25        | 226.33         | 15.25        | 8.31  |
| 10.335         | MM m | 0.19        | 229.62         | 18.47        | 8.43  |
| 11.310         | MM m | 0.22        | 1146.44        | 80.30        | 42.10 |
| 16.314         | MM m | 0.32        | 1120.62        | 54.67        | 41.15 |

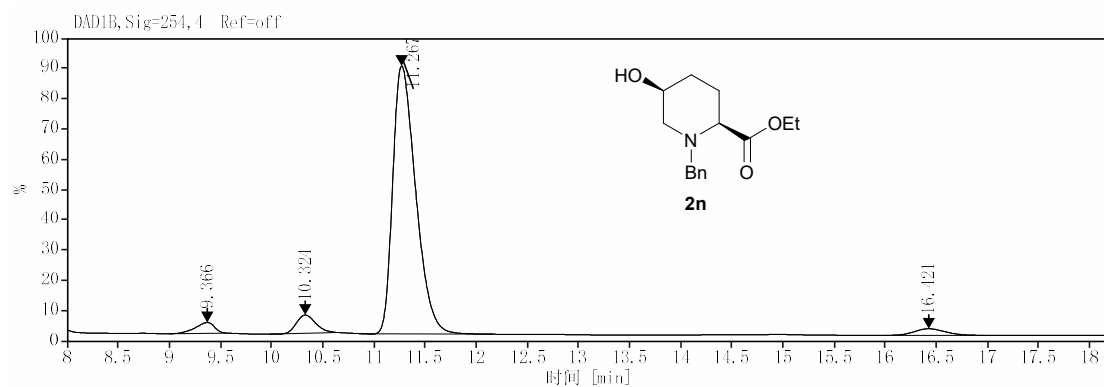

| Ret Time [min] | Type | Width [min] | Area [mAU * s] | Height [mAU] | Area% |
|----------------|------|-------------|----------------|--------------|-------|
| 9.366          | MM m | 0.20        | 122.88         | 9.45         | 3.01  |
| 10.324         | MM m | 0.20        | 206.61         | 15.87        | 5.06  |
| 11.267         | MM m | 0.24        | 3634.41        | 232.67       | 89.01 |
| 16.421         | MM m | 0.32        | 119.20         | 5.71         | 2.92  |

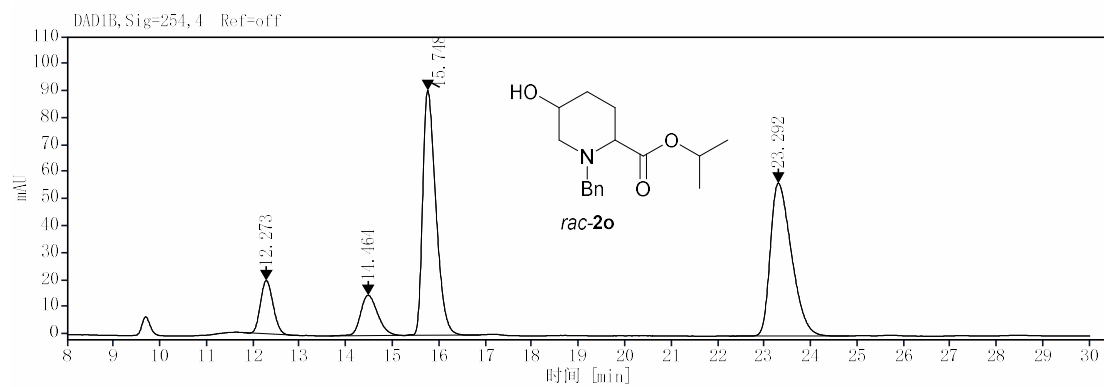

| Ret Time [min] | Type | Width [min] | Area [mAU * s] | Height [mAU] | Area% |
|----------------|------|-------------|----------------|--------------|-------|
| 12.273         | MM m | 0.29        | 368.19         | 19.65        | 8.52  |
| 14.464         | MM m | 0.39        | 380.31         | 14.93        | 8.80  |
| 15.748         | MM m | 0.30        | 1781.21        | 90.62        | 41.23 |
| 23.292         | MM m | 0.49        | 1790.55        | 56.64        | 41.45 |

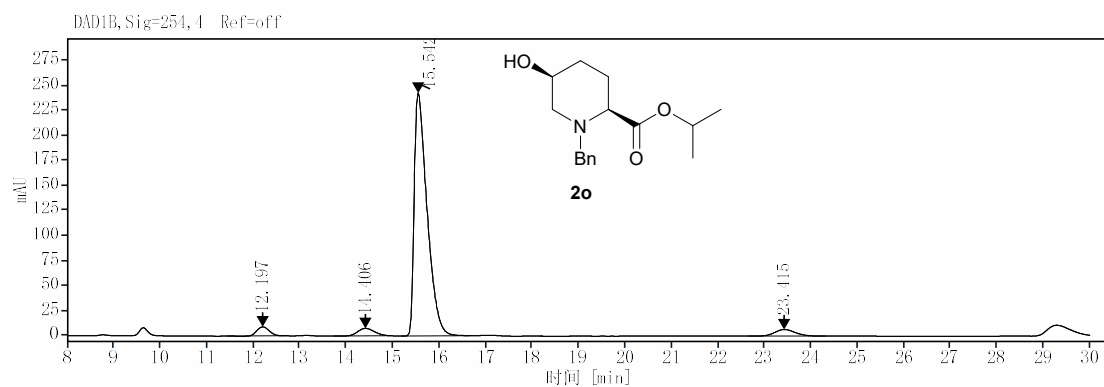

| Ret Time [min] | Type | Width [min] | Area [mAU * s] | Height [mAU] | Area% |
|----------------|------|-------------|----------------|--------------|-------|
| 12.197         | MM m | 0.29        | 164.21         | 9.07         | 3.14  |
| 14.406         | MM m | 0.39        | 189.25         | 7.53         | 3.62  |
| 15.542         | MM m | 0.29        | 4673.32        | 242.88       | 89.38 |
| 23.415         | MM m | 0.46        | 201.65         | 6.58         | 3.86  |

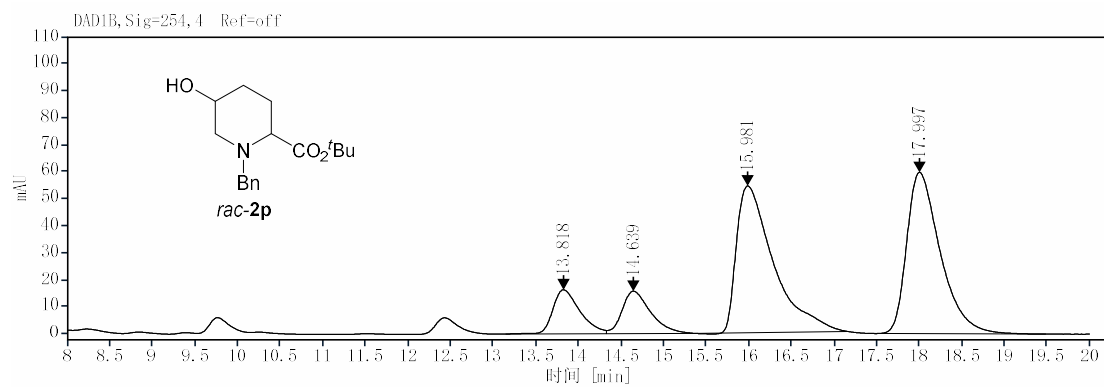

| Ret Time [min] | Type | Width [min] | Area [mAU * s] | Height [mAU] | Area% |
|----------------|------|-------------|----------------|--------------|-------|
| 13.818         | MM m | 0.33        | 358.07         | 16.31        | 8.95  |
| 14.639         | MM m | 0.35        | 364.05         | 15.69        | 9.10  |
| 15.981         | MM m | 0.45        | 1643.38        | 54.37        | 41.07 |
| 17.997         | MM m | 0.41        | 1635.44        | 59.74        | 40.88 |

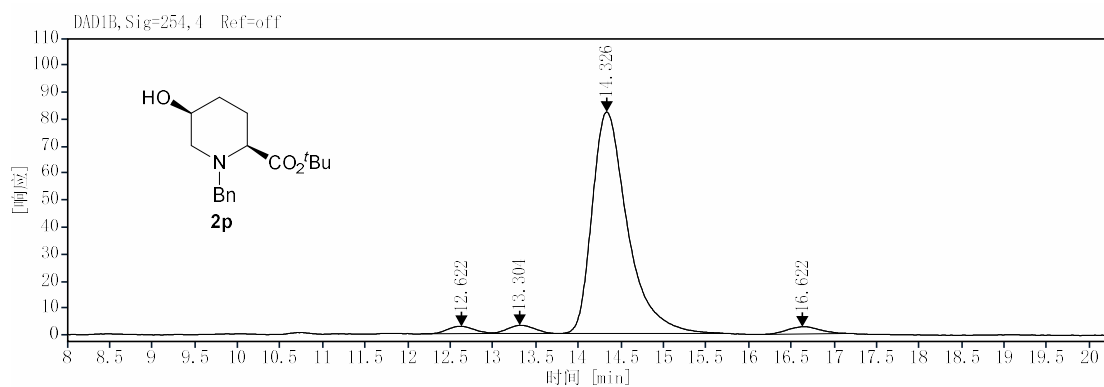

| Ret Time [min] | Type | Width [min] | Area [mAU * s] | Height [mAU] | Area% |
|----------------|------|-------------|----------------|--------------|-------|
| 12.622         | MM m | 0.27        | 60.50          | 2.76         | 2.36  |
| 13.304         | MM m | 0.27        | 65.84          | 3.03         | 2.57  |
| 14.326         | MM m | 0.44        | 2364.38        | 81.98        | 92.37 |
| 16.622         | MM m | 0.32        | 69.03          | 2.66         | 2.70  |

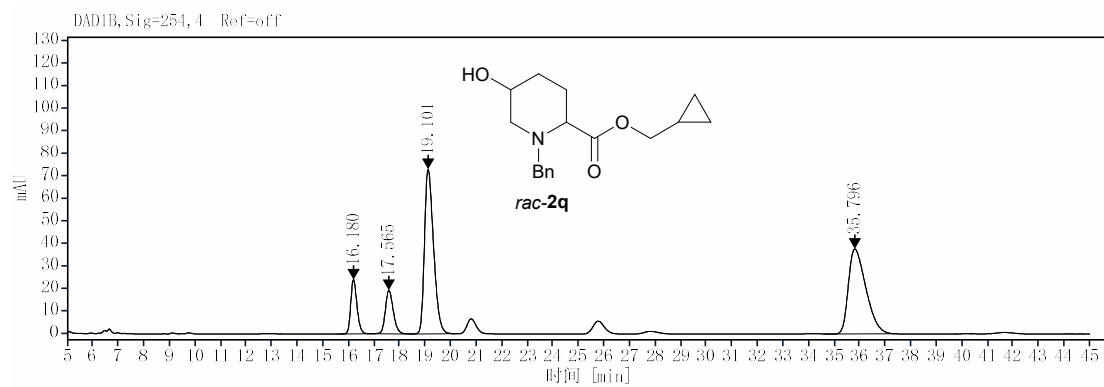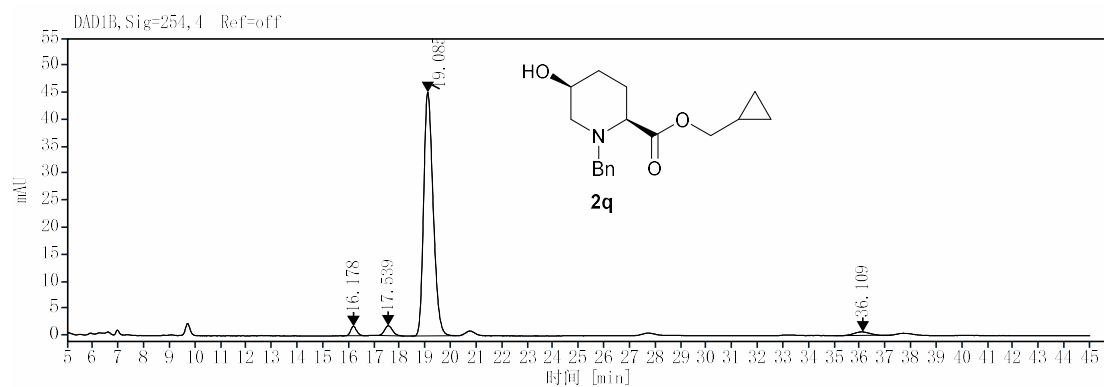

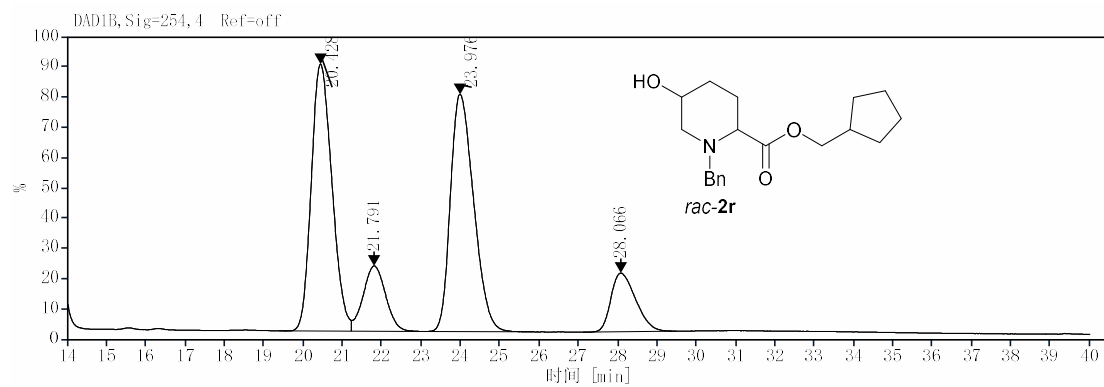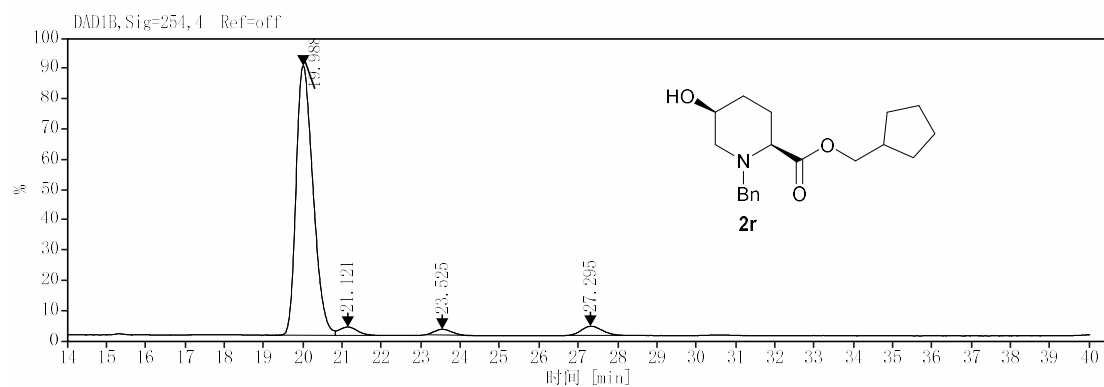

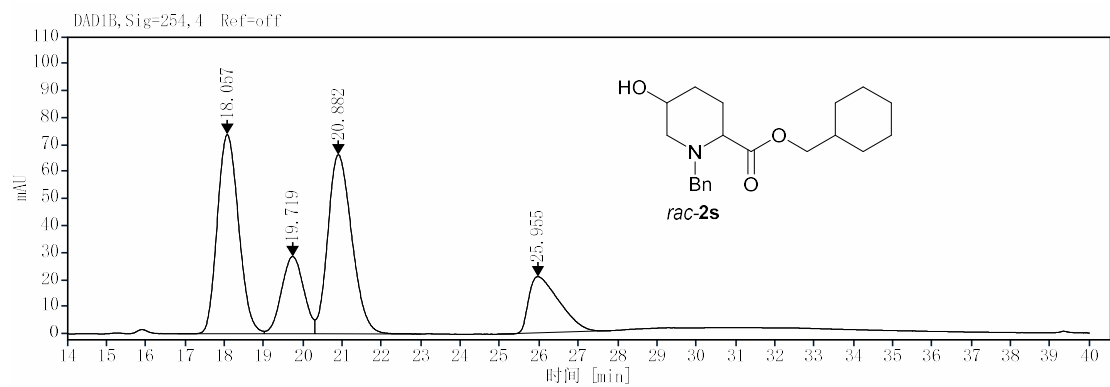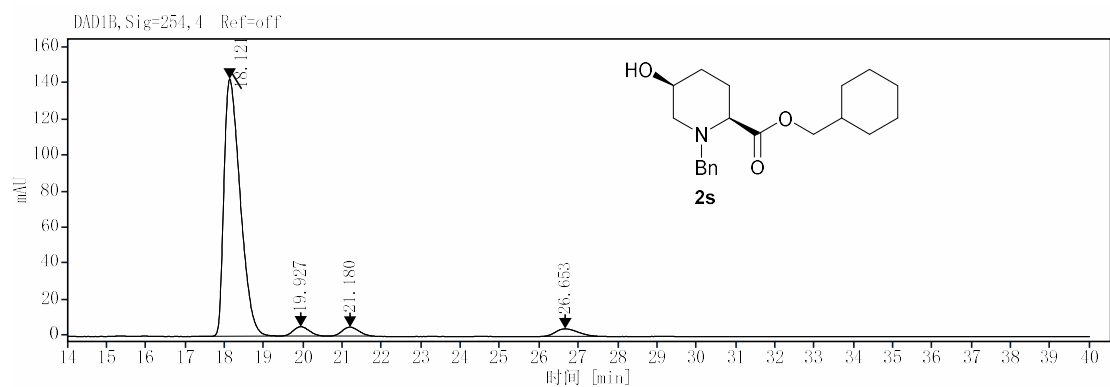

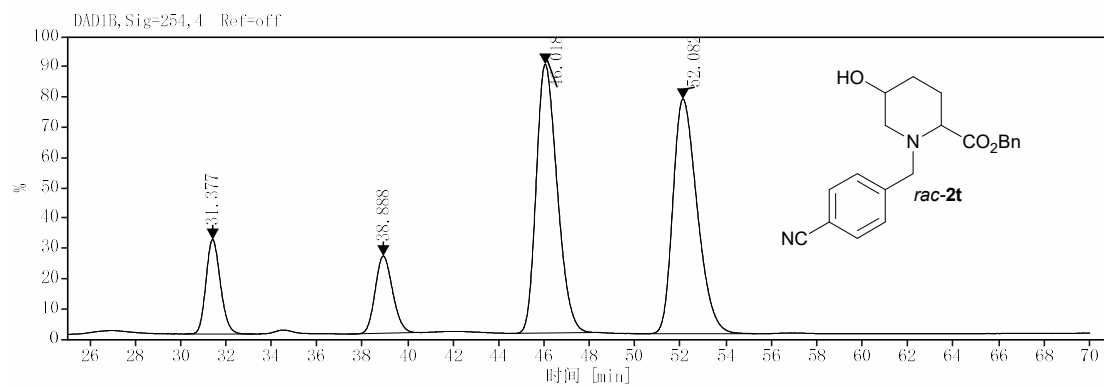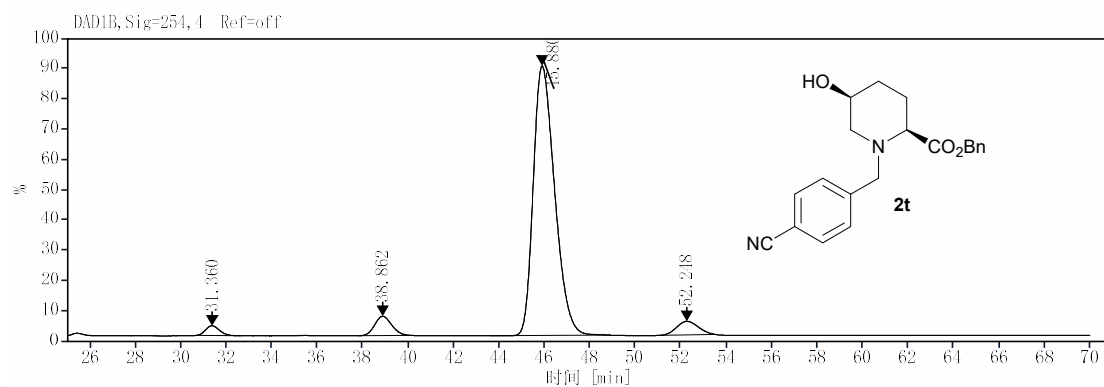



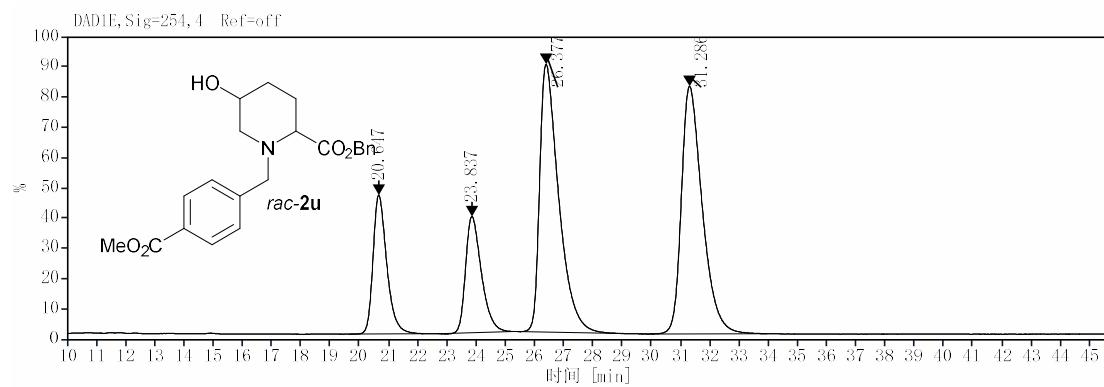

| Ret Time [min] | Type | Width [min] | Area [mAU * s] | Height [mAU] | Area% |
|----------------|------|-------------|----------------|--------------|-------|
| 20.647         | MM m | 0.50        | 5252.59        | 160.76       | 13.61 |
| 23.837         | MM m | 0.57        | 5056.26        | 134.56       | 13.10 |
| 26.377         | MM m | 0.66        | 14057.19       | 309.79       | 36.41 |
| 31.286         | MM m | 0.73        | 14238.86       | 286.42       | 36.88 |

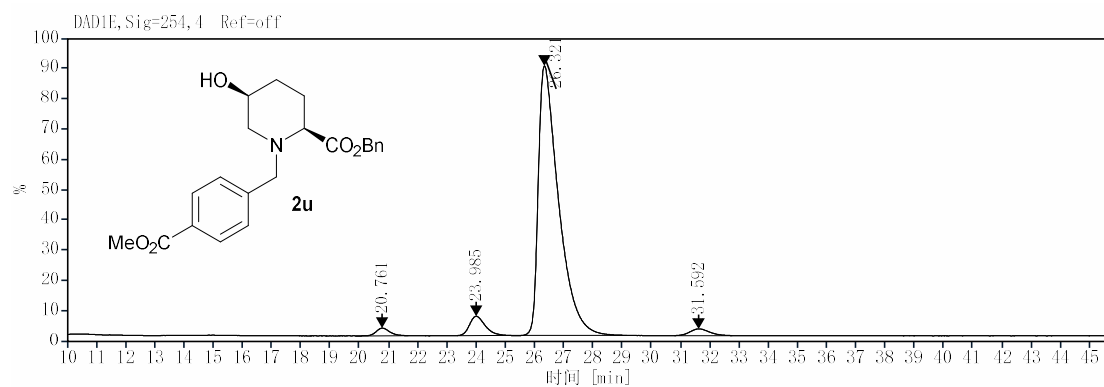

| Ret Time [min] | Type | Width [min] | Area [mAU * s] | Height [mAU] | Area% |
|----------------|------|-------------|----------------|--------------|-------|
| 20.761         | MM m | 0.43        | 439.02         | 13.75        | 1.72  |
| 23.985         | MM m | 0.53        | 1296.10        | 34.74        | 5.06  |
| 26.321         | MM m | 0.71        | 23298.98       | 483.48       | 91.03 |
| 31.592         | MM m | 0.57        | 560.10         | 12.01        | 2.19  |

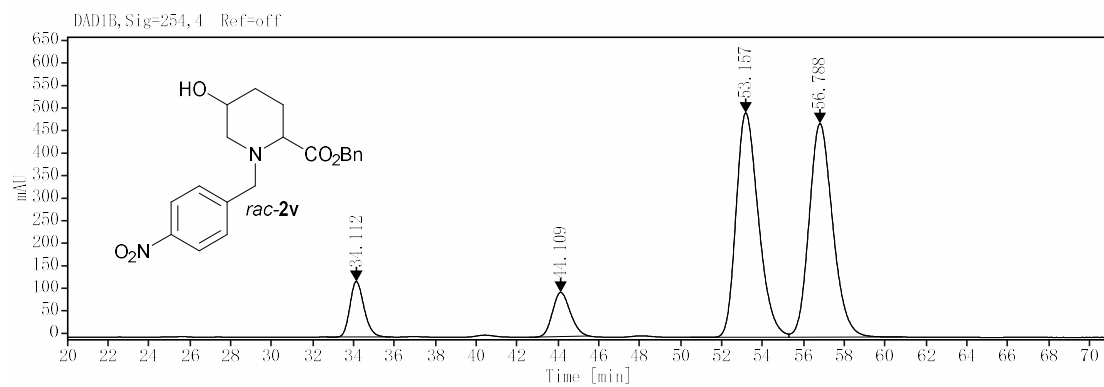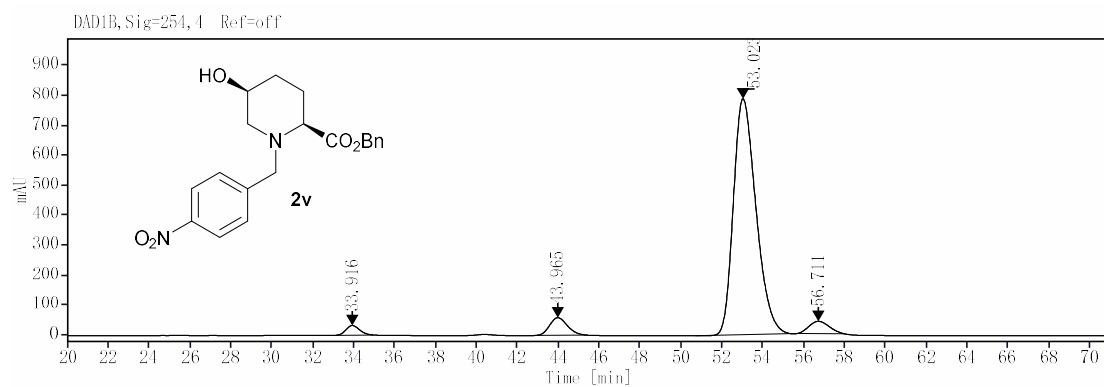

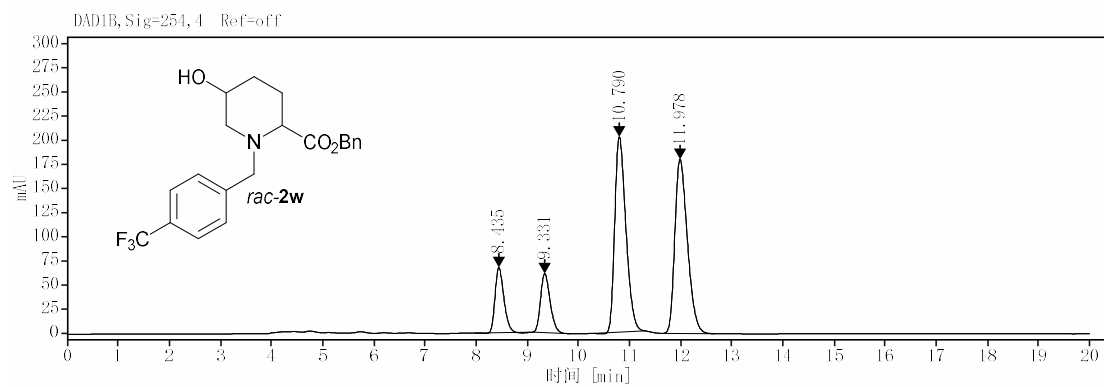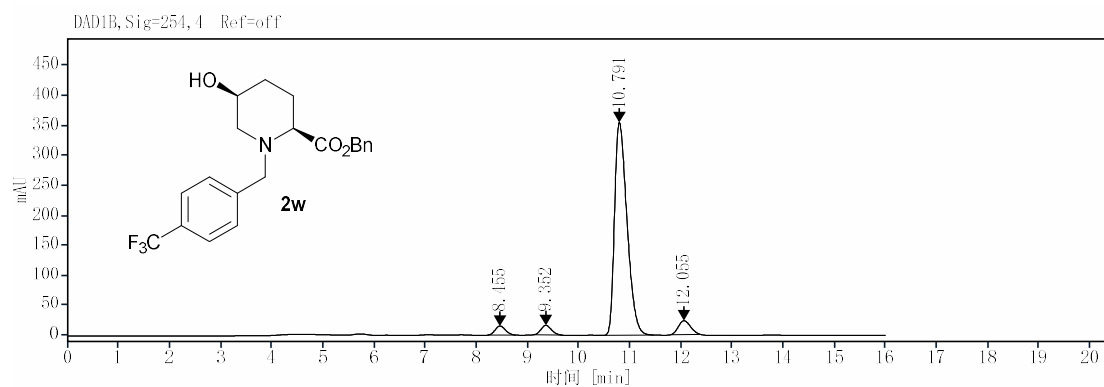

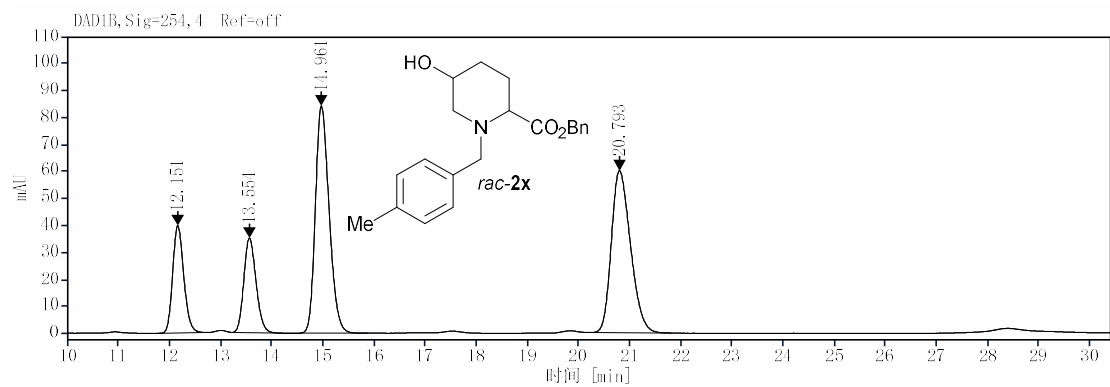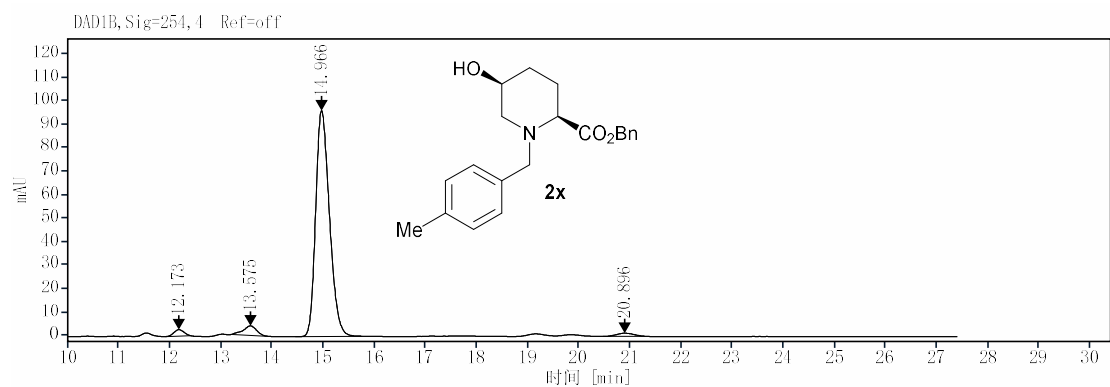

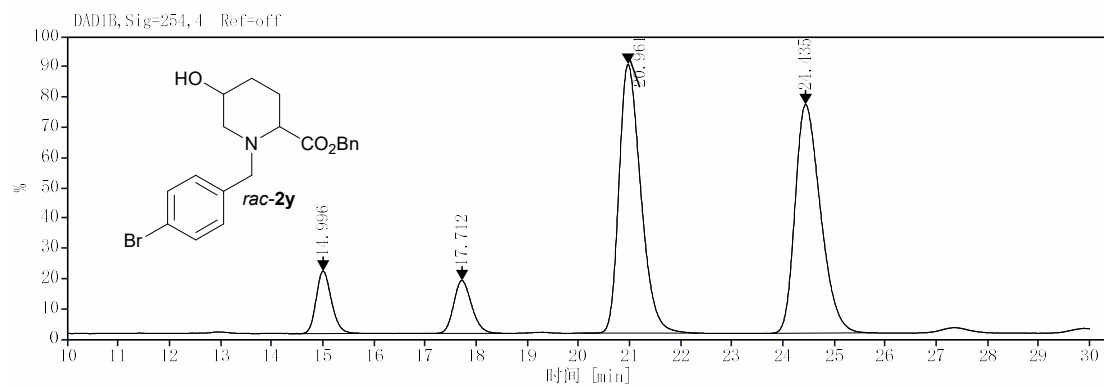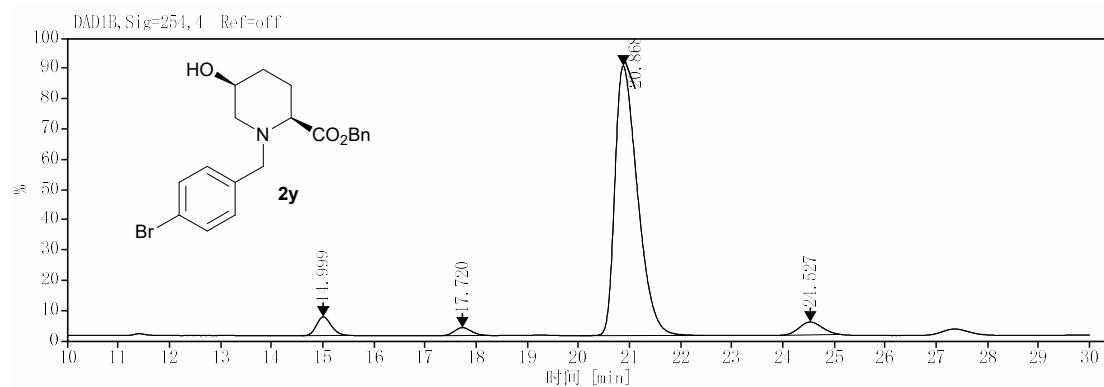

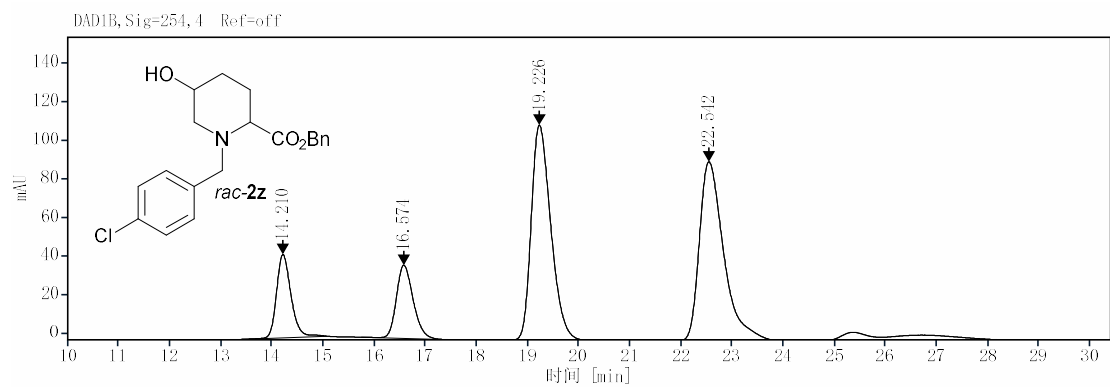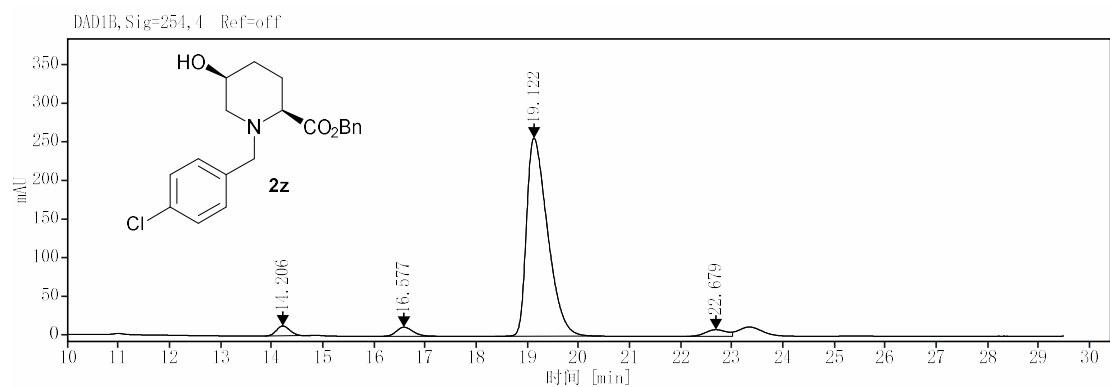

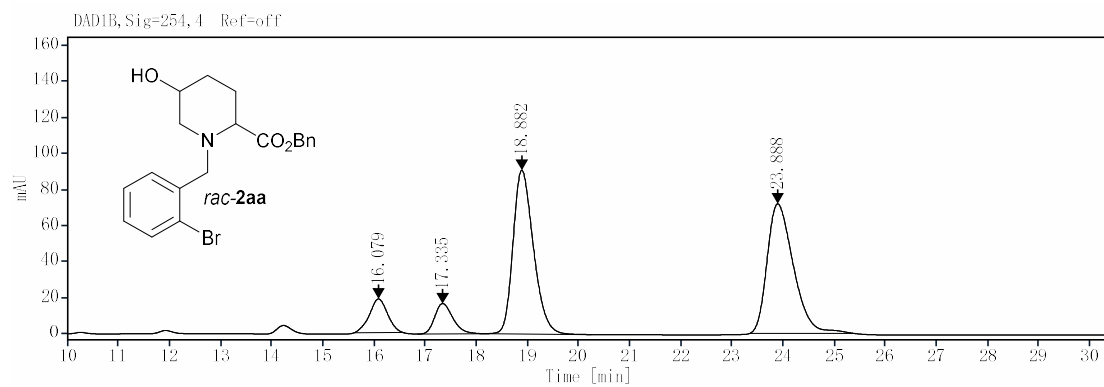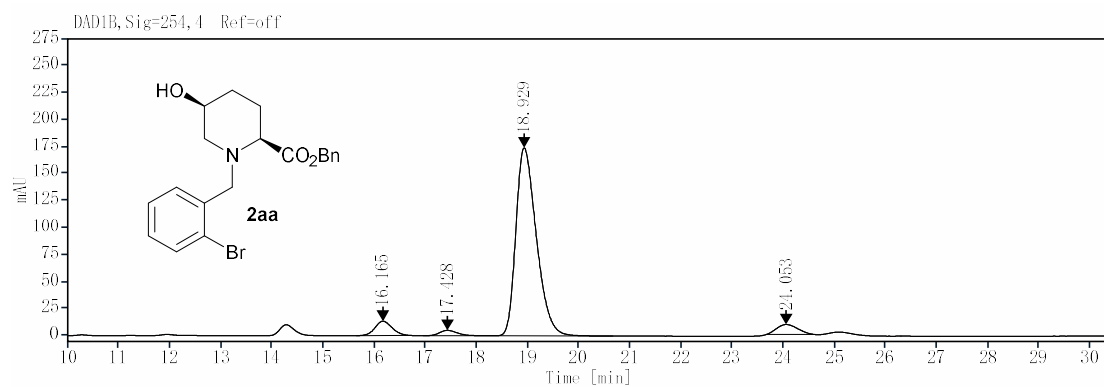

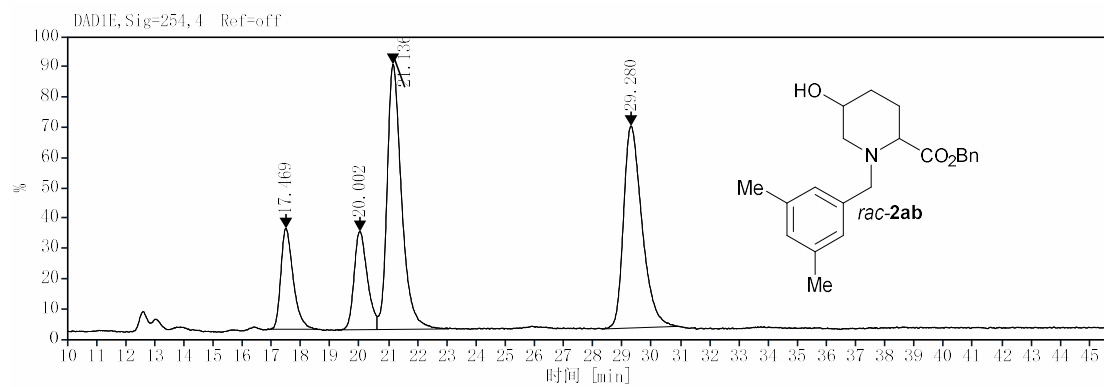

| Ret Time [min] | Type | Width [min] | Area [mAU * s] | Height [mAU] | Area% |
|----------------|------|-------------|----------------|--------------|-------|
| 17.469         | MM m | 0.42        | 569.31         | 19.43        | 12.28 |
| 20.002         | MM m | 0.44        | 597.82         | 18.93        | 12.89 |
| 21.136         | MM m | 0.50        | 1763.07        | 51.09        | 38.02 |
| 29.280         | MM m | 0.63        | 1706.97        | 38.88        | 36.81 |

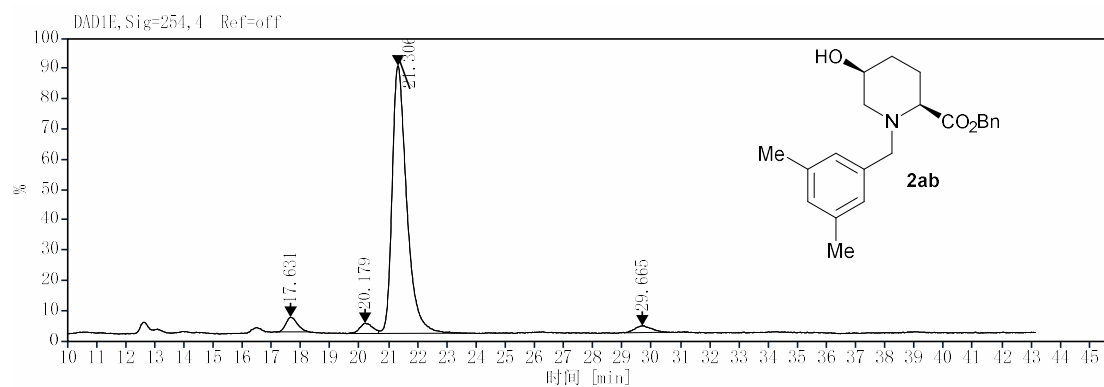

| Ret Time [min] | Type | Width [min] | Area [mAU * s] | Height [mAU] | Area% |
|----------------|------|-------------|----------------|--------------|-------|
| 17.631         | MM m | 0.33        | 98.51          | 3.65         | 3.83  |
| 20.179         | MM m | 0.37        | 77.03          | 2.51         | 3.00  |
| 21.306         | MM m | 0.52        | 2329.00        | 67.24        | 90.60 |
| 29.665         | MM m | 0.46        | 66.12          | 1.71         | 2.57  |



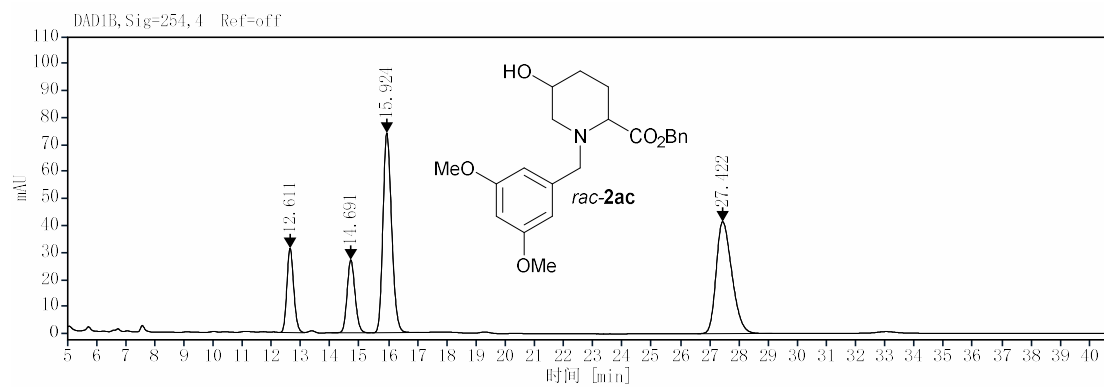

| Ret Time [min] | Type | Width [min] | Area [mAU * s] | Height [mAU] | Area% |
|----------------|------|-------------|----------------|--------------|-------|
| 12.611         | BV   | 0.88        | 510.27         | 31.24        | 12.43 |
| 14.691         | BB   | 1.33        | 512.23         | 27.01        | 12.48 |
| 15.924         | BB   | 1.61        | 1535.15        | 73.93        | 37.40 |
| 27.422         | BB   | 2.56        | 1547.46        | 41.46        | 37.70 |

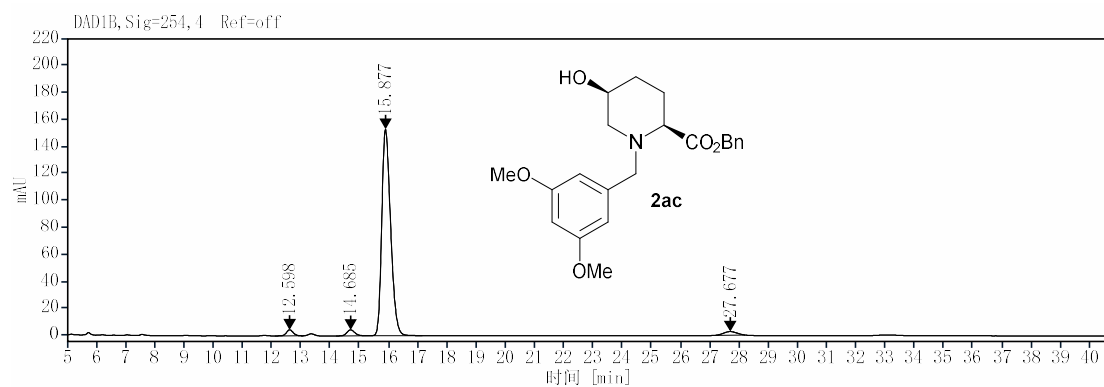

| Ret Time [min] | Type | Width [min] | Area [mAU * s] | Height [mAU] | Area% |
|----------------|------|-------------|----------------|--------------|-------|
| 12.598         | MM m | 0.24        | 70.89          | 4.47         | 2.06  |
| 14.685         | MM m | 0.29        | 81.19          | 4.39         | 2.36  |
| 15.877         | BB   | 1.79        | 3209.14        | 152.77       | 93.19 |
| 27.677         | MM m | 0.46        | 82.27          | 2.64         | 2.39  |

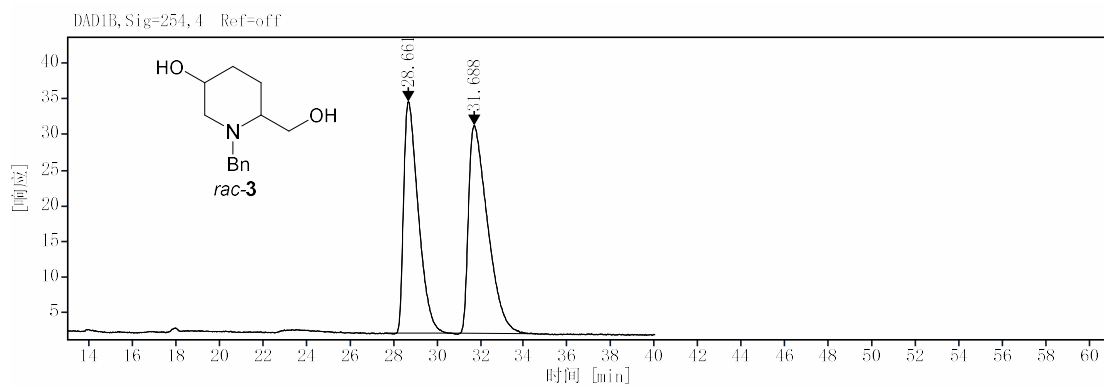

| Ret Time [min] | Type | Width [min] | Area [mAU * s] | Height [mAU] | Area% |
|----------------|------|-------------|----------------|--------------|-------|
| 28.661         | MM m | 0.65        | 1715.80        | 32.57        | 49.08 |
| 31.688         | MM m | 0.73        | 1780.13        | 29.24        | 50.92 |

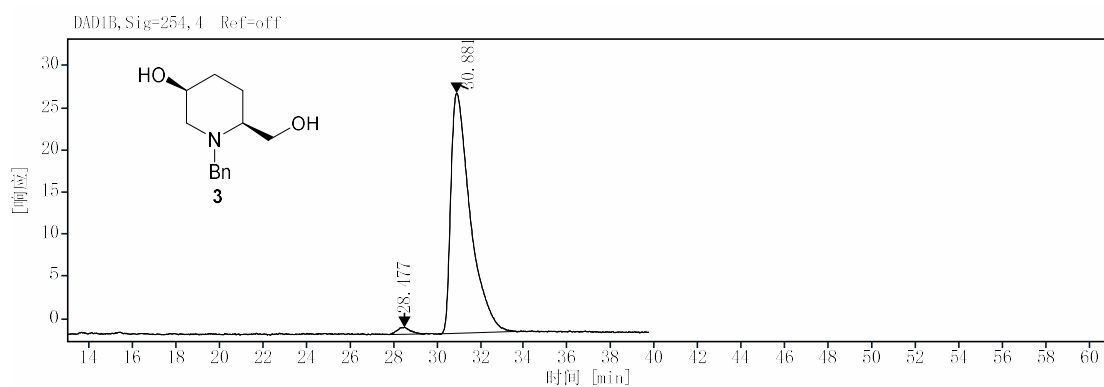

| Ret Time [min] | Type | Width [min] | Area [mAU * s] | Height [mAU] | Area% |
|----------------|------|-------------|----------------|--------------|-------|
| 28.477         | MM m | 0.50        | 34.82          | 0.82         | 1.93  |
| 30.881         | MM m | 0.82        | 1766.92        | 28.47        | 98.07 |

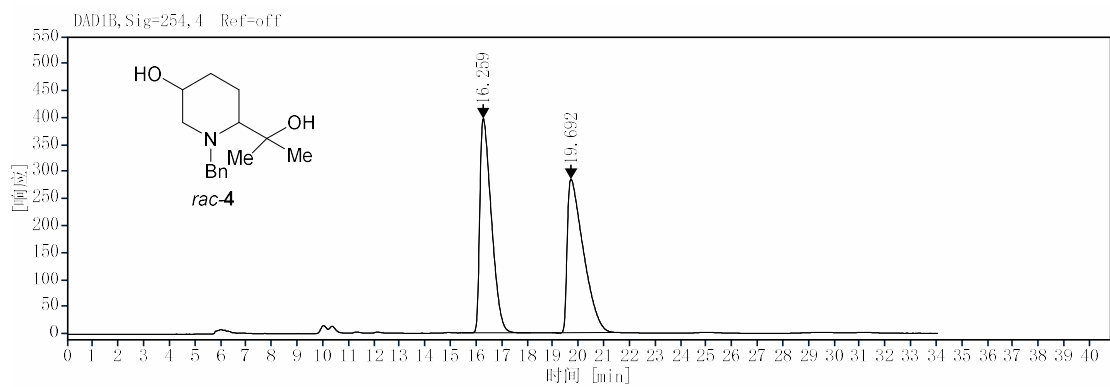

| Ret Time [min] | Type | Width [min] | Area [mAU * s] | Height [mAU] | Area% |
|----------------|------|-------------|----------------|--------------|-------|
| 16.259         | MM m | 0.49        | 12474.32       | 396.57       | 49.97 |
| 19.692         | MM m | 0.64        | 12491.48       | 284.37       | 50.03 |

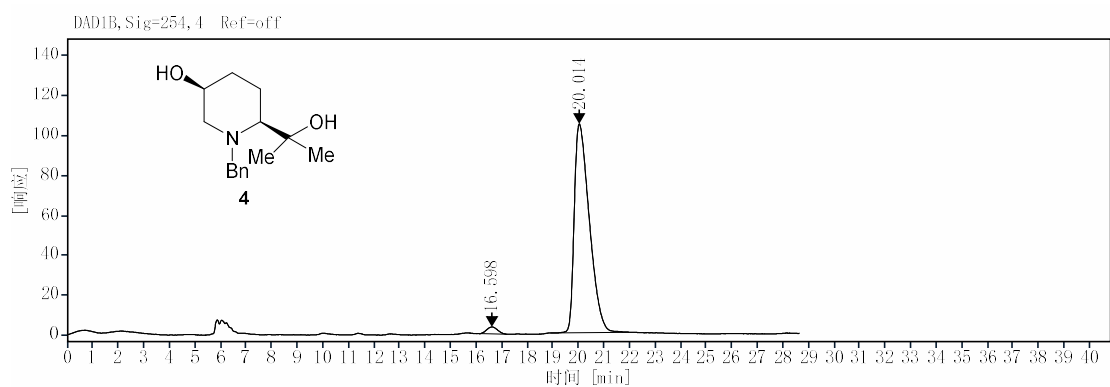

| Ret Time [min] | Type | Width [min] | Area [mAU * s] | Height [mAU] | Area% |
|----------------|------|-------------|----------------|--------------|-------|
| 16.598         | MM m | 0.35        | 99.96          | 3.47         | 2.28  |
| 20.014         | MM m | 0.60        | 4276.06        | 104.37       | 97.72 |

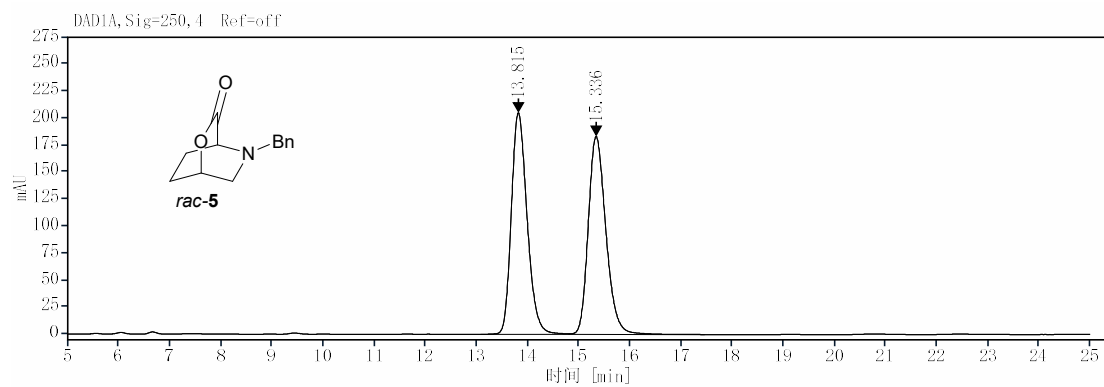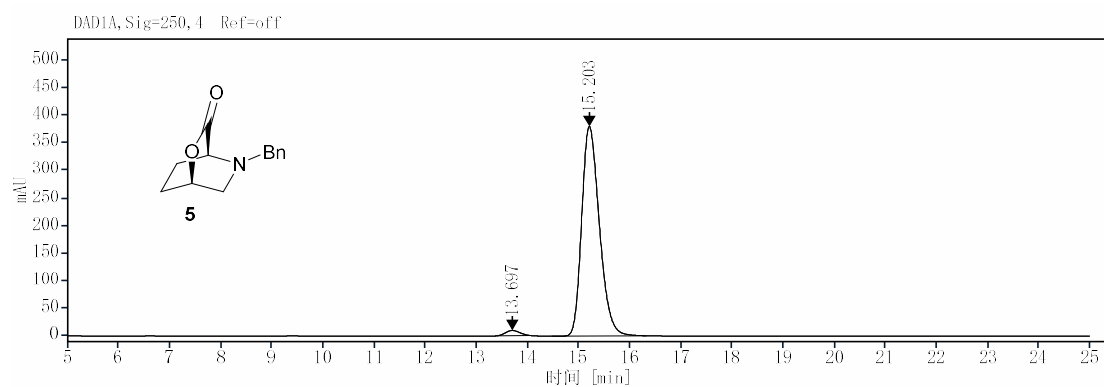

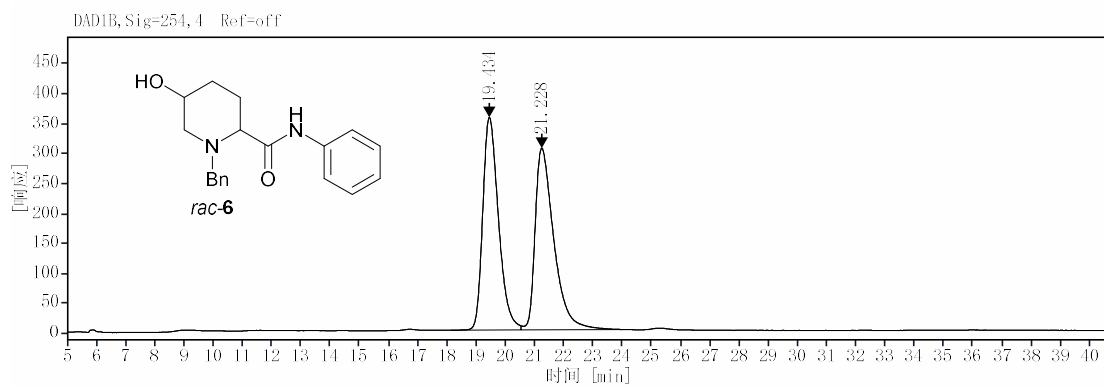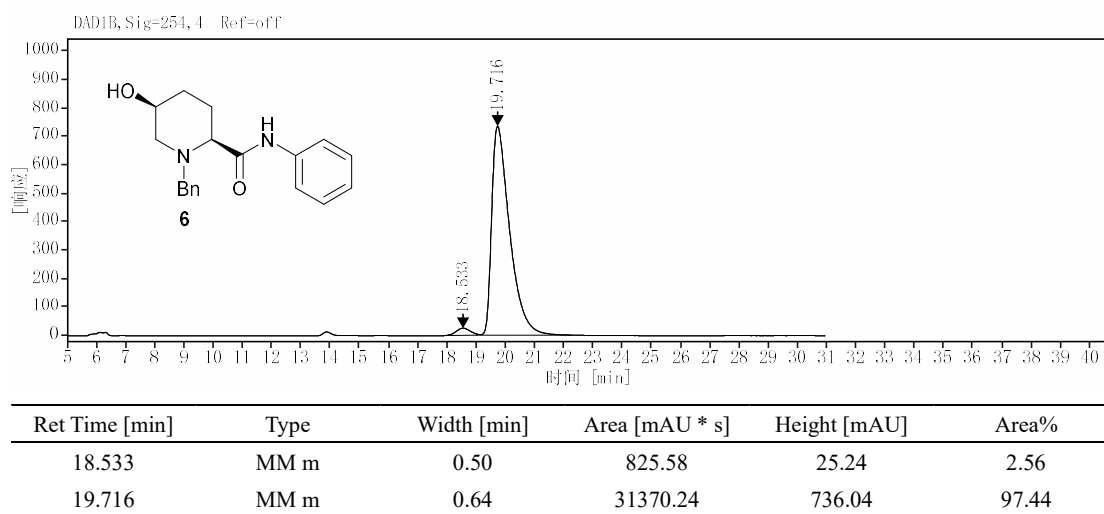

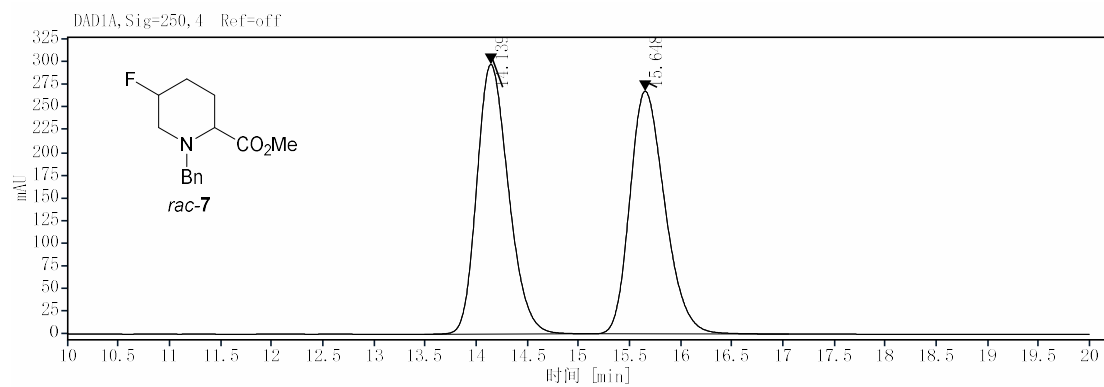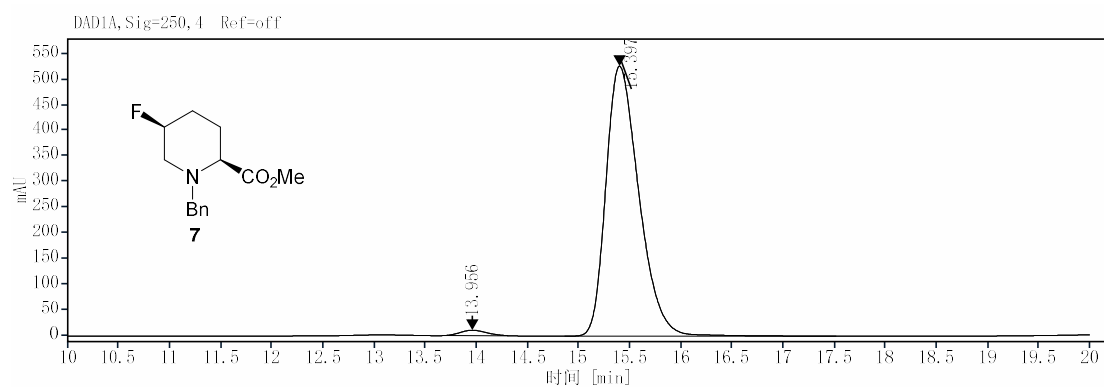

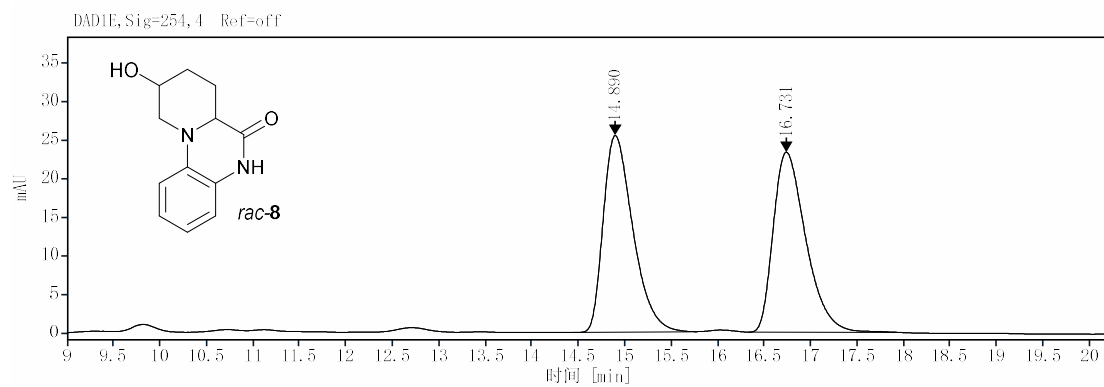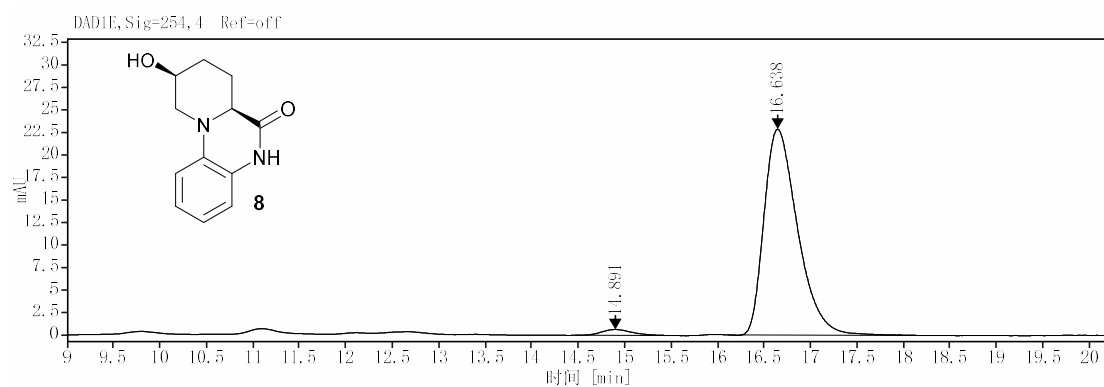

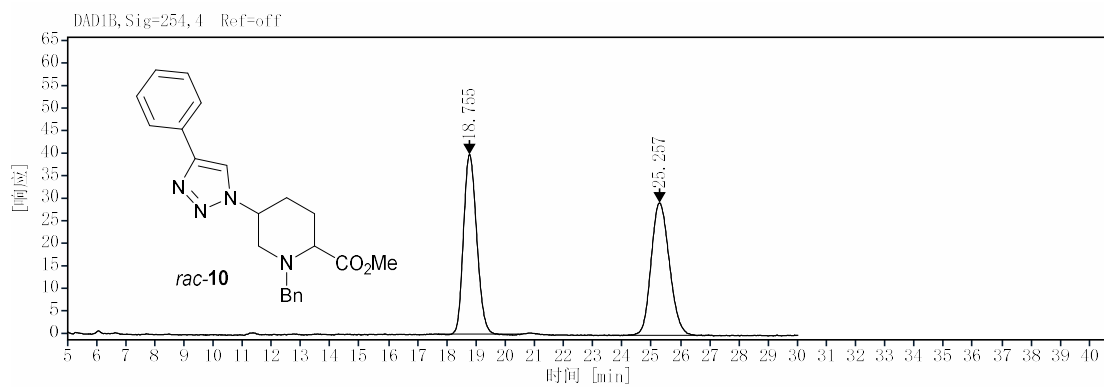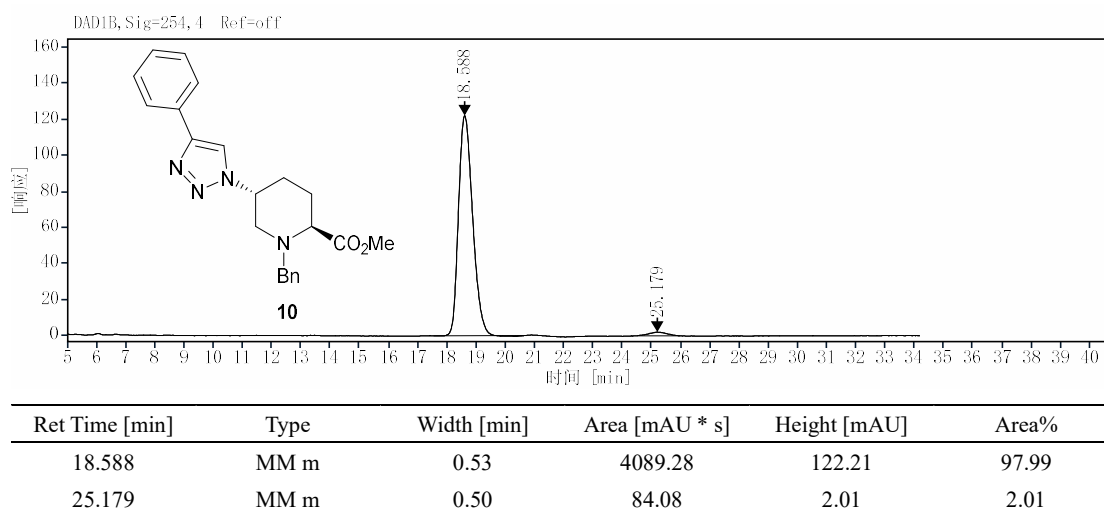



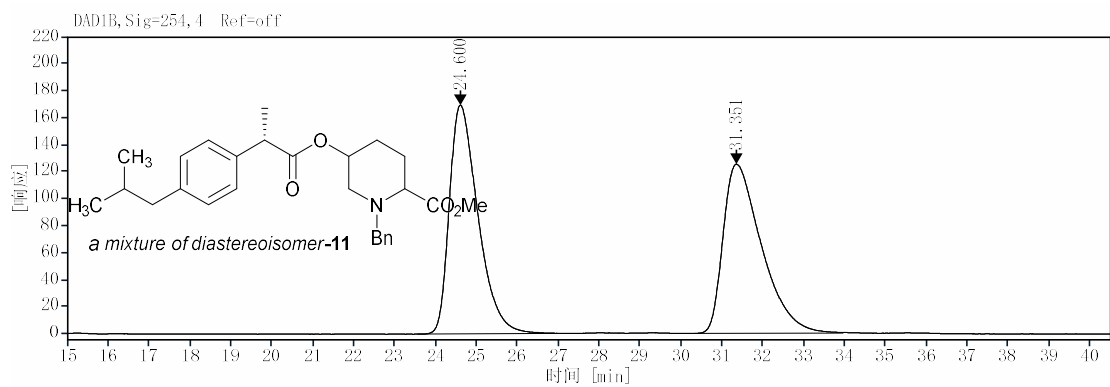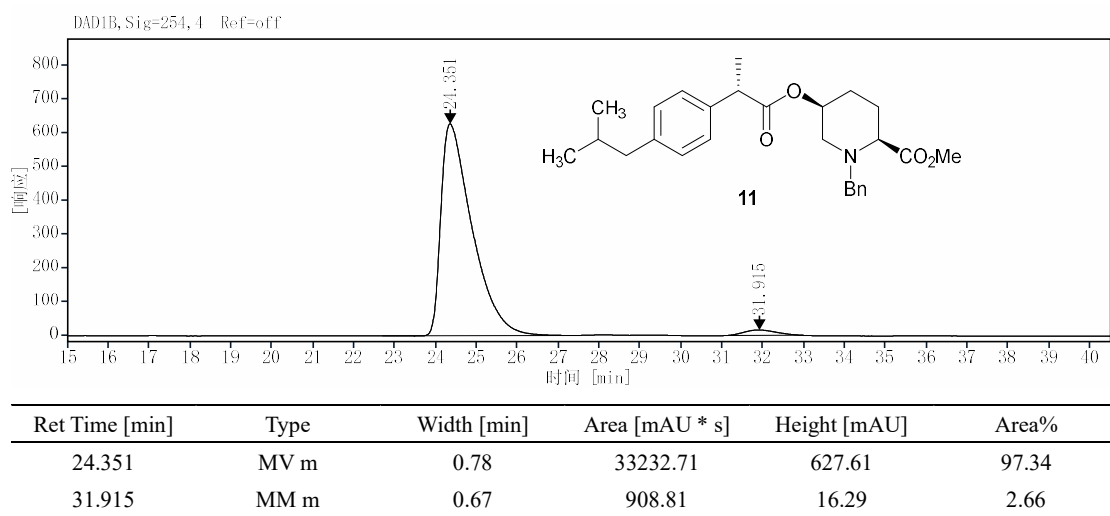

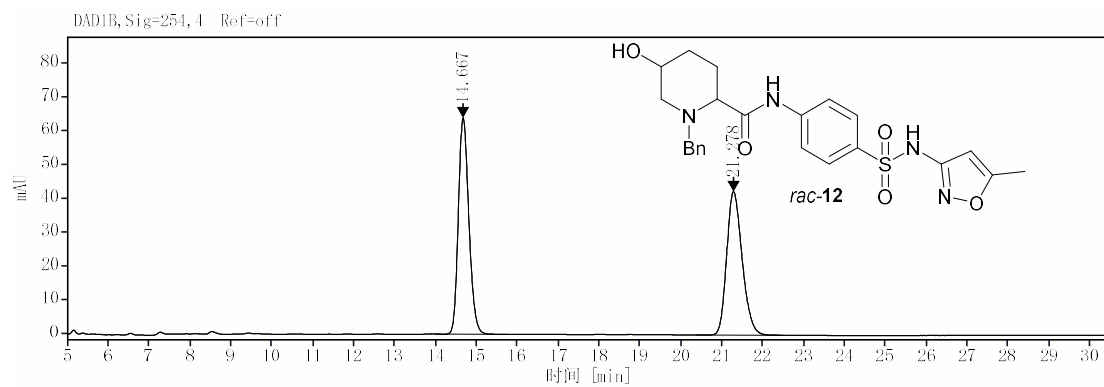

| Ret Time [min] | Type | Width [min] | Area [mAU * s] | Height [mAU] | Area% |
|----------------|------|-------------|----------------|--------------|-------|
| 14.667         | MM m | 0.27        | 1134.19        | 64.07        | 50.34 |
| 21.278         | MM m | 0.40        | 1118.73        | 42.54        | 49.66 |

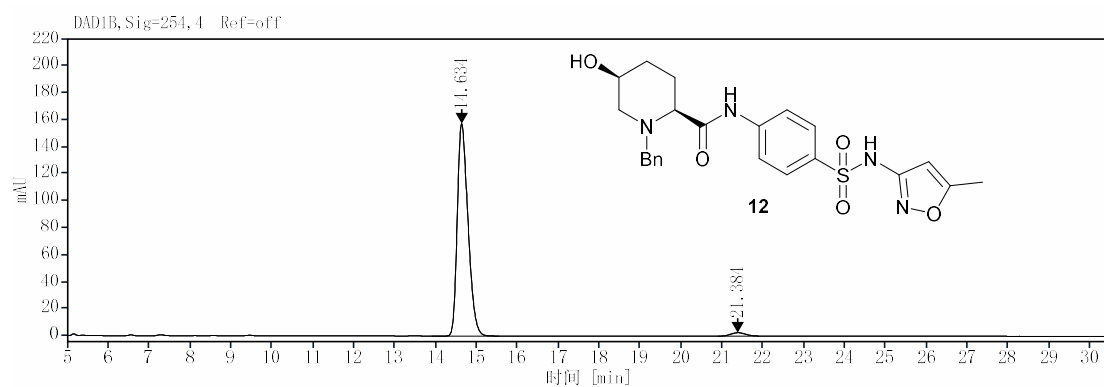

| Ret Time [min] | Type | Width [min] | Area [mAU * s] | Height [mAU] | Area% |
|----------------|------|-------------|----------------|--------------|-------|
| 14.634         | MM m | 0.28        | 2858.60        | 157.27       | 97.84 |
| 21.384         | MM m | 0.39        | 63.12          | 2.52         | 2.16  |

## 6. Crystallographic Data

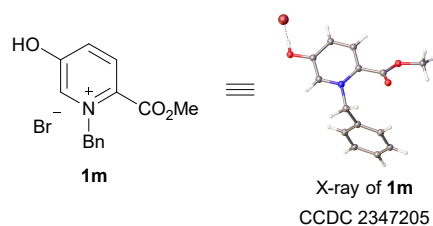

**Figure S4.** ORTEP of the molecular structure of **1m**.

Diffraction-quality crystal of compound **1m** was obtained in MeOH and DCM.

CCDC 2347205 contains the supplementary crystallographic data for compound **1m**.

|                                             |                                                               |
|---------------------------------------------|---------------------------------------------------------------|
| Empirical formula                           | C <sub>14</sub> H <sub>14</sub> BrNO <sub>3</sub>             |
| Formula weight                              | 324.17                                                        |
| Temperature/K                               | 150.0                                                         |
| Crystal system                              | monoclinic                                                    |
| Space group                                 | P2 <sub>1</sub> /c                                            |
| a/Å                                         | 10.2580(8)                                                    |
| b/Å                                         | 12.5884(9)                                                    |
| c/Å                                         | 21.5327(18)                                                   |
| $\alpha$ /°                                 | 90                                                            |
| $\beta$ /°                                  | 96.556(3)                                                     |
| $\gamma$ /°                                 | 90                                                            |
| Volume/Å <sup>3</sup>                       | 2762.4(4)                                                     |
| Z                                           | 8                                                             |
| $\rho_{\text{calc}}/\text{cm}^3$            | 1.559                                                         |
| $\mu/\text{mm}^{-1}$                        | 2.979                                                         |
| F(000)                                      | 1312.0                                                        |
| Crystal size/mm <sup>3</sup>                | 0.38 × 0.26 × 0.12                                            |
| Radiation                                   | MoK $\alpha$ ( $\lambda$ = 0.71073)                           |
| 2 $\theta$ range for data collection/°      | 3.996 to 55.202                                               |
| Index ranges                                | -13 ≤ h ≤ 13, -16 ≤ k ≤ 16, -28 ≤ l ≤ 23                      |
| Reflections collected                       | 31343                                                         |
| Independent reflections                     | 6314 [R <sub>int</sub> = 0.1055, R <sub>sigma</sub> = 0.0793] |
| Data/restraints/parameters                  | 6314/0/347                                                    |
| Goodness-of-fit on F <sup>2</sup>           | 1.007                                                         |
| Final R indexes [I ≥ 2 $\sigma$ (I)]        | R <sub>1</sub> = 0.0417, wR <sub>2</sub> = 0.0733             |
| Final R indexes [all data]                  | R <sub>1</sub> = 0.1003, wR <sub>2</sub> = 0.0885             |
| Largest diff. peak/hole / e Å <sup>-3</sup> | 0.35/-0.50                                                    |
